# Supplementary material
Source: Research Square preprint supplement (doi:10.21203/rs.3.rs-9902018/v1)
Supplement: Supplementary file 1 [file 336f9132639fdc9ab37d1205.xlsx]

## Sheet: Figure 2B
Apa, 20S CP and Apa-20S CP complex SEC MALS
volume (mL)	20S CP and Apa in complex (Rayleigh ratio)	volume (mL)	20S CP and Apa in complex (Molar mass)	volume (mL)	20S CP (Rayleigh ratio)	volume (mL)	20S CP (Molar mass)	volume (mL)	Apa (Rayleigh ratio)	volume (mL)	Apa (Molar mass)
1.82768	0.00118209	10.9655	1.88173e+06	1.82732	0.00064445	10.4668	2.2136e+06	1.82731	0.000750412	14.4061	431049
1.83441	0.00129409	10.9722	1.87877e+06	1.83405	0.000705773	10.4735	2.20739e+06	1.83404	0.000821119	14.4128	431727
1.84114	0.0013918	10.9789	1.87534e+06	1.84078	0.000758968	10.4803	2.20145e+06	1.84078	0.000880325	14.4196	431577
1.84788	0.00147939	10.9857	1.87096e+06	1.84752	0.000806219	10.487	2.1956e+06	1.84751	0.00093141	14.4263	431298
1.85461	0.00157164	10.9924	1.86561e+06	1.85425	0.000848722	10.4937	2.18917e+06	1.85424	0.000975172	14.433	430947
1.86134	0.00166359	10.9991	1.85997e+06	1.86098	0.000886579	10.5005	2.1823e+06	1.86098	0.00101263	14.4398	430603
1.86808	0.00173591	11.0059	1.85433e+06	1.86772	0.000919828	10.5072	2.17521e+06	1.86771	0.00104555	14.4465	430205
1.87481	0.001792	11.0126	1.84909e+06	1.87445	0.000949117	10.5139	2.16831e+06	1.87445	0.0010747	14.4532	429787
1.88155	0.00183937	11.0193	1.84434e+06	1.88119	0.000974688	10.5207	2.16147e+06	1.88118	0.00110155	14.46	429347
1.88828	0.00188138	11.0261	1.84161e+06	1.88792	0.000996667	10.5274	2.15462e+06	1.88791	0.00112707	14.4667	428835
1.89501	0.00191733	11.0328	1.83988e+06	1.89465	0.00101741	10.5341	2.14815e+06	1.89465	0.00115158	14.4734	428300
1.90175	0.0019469	11.0395	1.83806e+06	1.90139	0.00103732	10.5409	2.14136e+06	1.90138	0.00117507	14.4802	427787
1.90848	0.00197316	11.0463	1.83537e+06	1.90812	0.00105441	10.5476	2.13444e+06	1.90812	0.0011959	14.4869	427272
1.91522	0.00199799	11.053	1.83132e+06	1.91486	0.00106913	10.5544	2.1278e+06	1.91485	0.00121316	14.4936	426741
1.92195	0.00201765	11.0597	1.82696e+06	1.92159	0.00108161	10.5611	2.12097e+06	1.92158	0.00122691	14.5004	426219
1.92868	0.00202939	11.0665	1.82213e+06	1.92832	0.00109159	10.5678	2.11379e+06	1.92832	0.00123723	14.5071	425679
1.93542	0.00203528	11.0732	1.81764e+06	1.93506	0.00110045	10.5746	2.10703e+06	1.93505	0.00124369	14.5138	425123
1.94215	0.00203771	11.0799	1.8144e+06	1.94179	0.00110927	10.5813	2.10058e+06	1.94178	0.00124631	14.5206	424572
1.94888	0.00204116	11.0867	1.81117e+06	1.94852	0.0011175	10.588	2.09379e+06	1.94852	0.00124736	14.5273	423995
1.95562	0.00205994	11.0934	1.80619e+06	1.95526	0.00112442	10.5948	2.0872e+06	1.95525	0.00125036	14.534	423418
1.96235	0.00209329	11.1002	1.80149e+06	1.96199	0.00112963	10.6015	2.08074e+06	1.96199	0.00125574	14.5408	422829
1.96909	0.00212224	11.1069	1.79707e+06	1.96873	0.00113366	10.6082	2.07404e+06	1.96872	0.00126103	14.5475	422176
1.97582	0.00213971	11.1136	1.79206e+06	1.97546	0.00113642	10.615	2.06752e+06	1.97545	0.00126542	14.5542	421459
1.98255	0.00214257	11.1204	1.78759e+06	1.98219	0.00113737	10.6217	2.06131e+06	1.98219	0.00126908	14.561	420703
1.98929	0.00213648	11.1271	1.78294e+06	1.98893	0.00113766	10.6284	2.0548e+06	1.98892	0.00127178	14.5677	419934
1.99602	0.00213095	11.1338	1.77875e+06	1.99566	0.00113962	10.6352	2.04819e+06	1.99565	0.00127306	14.5744	419162
2.00276	0.00212535	11.1406	1.77613e+06	2.0024	0.00114302	10.6419	2.04159e+06	2.00239	0.00127254	14.5812	418365
2.00949	0.00211879	11.1473	1.77319e+06	2.00913	0.00114592	10.6486	2.03484e+06	2.00912	0.00127144	14.5879	417531
2.01622	0.00211069	11.154	1.7691e+06	2.01586	0.00114813	10.6554	2.02808e+06	2.01586	0.00127121	14.5946	416680
2.02296	0.00210244	11.1608	1.76487e+06	2.0226	0.00114943	10.6621	2.02146e+06	2.02259	0.00127123	14.6014	415829
2.02969	0.00209747	11.1675	1.76035e+06	2.02933	0.00114982	10.6688	2.01506e+06	2.02932	0.001271	14.6081	414943
2.03642	0.00209503	11.1742	1.75675e+06	2.03606	0.00115106	10.6756	2.00879e+06	2.03606	0.00127026	14.6148	414034
2.04316	0.00209203	11.181	1.75377e+06	2.0428	0.00115334	10.6823	2.0025e+06	2.04279	0.00126852	14.6216	413133
2.04989	0.0020876	11.1877	1.74969e+06	2.04953	0.00115487	10.689	1.99601e+06	2.04953	0.00126731	14.6283	412185
2.05663	0.00208075	11.1944	1.74412e+06	2.05627	0.00115481	10.6958	1.98925e+06	2.05626	0.00126746	14.635	411181
2.06336	0.00207238	11.2012	1.73911e+06	2.063	0.0011511	10.7025	1.9824e+06	2.06299	0.00126721	14.6418	410105
2.07009	0.00206466	11.2079	1.73422e+06	2.06973	0.00114473	10.7092	1.97564e+06	2.06973	0.00126529	14.6485	408948
2.07683	0.00205719	11.2146	1.72858e+06	2.07647	0.00113881	10.716	1.96914e+06	2.07646	0.00126174	14.6552	407729
2.08356	0.00204929	11.2214	1.72396e+06	2.0832	0.00113355	10.7227	1.96273e+06	2.08319	0.00125879	14.662	406474
2.09029	0.00204011	11.2281	1.72001e+06	2.08993	0.00112864	10.7294	1.95622e+06	2.08993	0.0012574	14.6687	405176
2.09703	0.00202994	11.2348	1.71692e+06	2.09667	0.00112461	10.7362	1.94974e+06	2.09666	0.00125629	14.6754	403843
2.10376	0.00201998	11.2416	1.71446e+06	2.1034	0.0011215	10.7429	1.94346e+06	2.1034	0.00125404	14.6822	402466
2.1105	0.00200905	11.2483	1.71082e+06	2.11014	0.00111841	10.7496	1.93723e+06	2.11013	0.00124989	14.6889	401019
2.11723	0.00199494	11.255	1.70722e+06	2.11687	0.00111488	10.7564	1.93118e+06	2.11686	0.00124601	14.6956	399508
2.12396	0.00198083	11.2618	1.70365e+06	2.1236	0.0011107	10.7631	1.92524e+06	2.1236	0.00124501	14.7024	397922
2.1307	0.00197204	11.2685	1.69898e+06	2.13034	0.00110664	10.7698	1.91899e+06	2.13033	0.00124472	14.7091	396295
2.13743	0.00196754	11.2752	1.6932e+06	2.13707	0.00110374	10.7766	1.91271e+06	2.13707	0.00124323	14.7158	394643
2.14417	0.00196418	11.282	1.68856e+06	2.14381	0.00110186	10.7833	1.9062e+06	2.1438	0.0012398	14.7226	395608
2.1509	0.00196078	11.2887	1.68434e+06	2.15054	0.00110079	10.79	1.89961e+06	2.15053	0.00123379	15.0929	271287
2.15763	0.00195709	11.2954	1.6792e+06	2.15727	0.00110268	10.7968	1.89329e+06	2.15727	0.00122729	15.0997	272568
2.16437	0.00195291	11.3022	1.67465e+06	2.16401	0.0011072	10.8035	1.88712e+06	2.164	0.00122216	15.1064	271824
2.1711	0.00194754	11.3089	1.66892e+06	2.17074	0.00111083	10.8102	1.88106e+06	2.17073	0.00121789	15.1131	271095
2.17783	0.00194245	11.3156	1.66366e+06	2.17747	0.0011112	10.817	1.87522e+06	2.17747	0.0012144	15.1199	270366
2.18457	0.00193939	11.3224	1.65934e+06	2.18421	0.00110687	10.8237	1.86956e+06	2.1842	0.00121314	15.1266	269630
2.1913	0.00193727	11.3291	1.65492e+06	2.19094	0.00110043	10.8304	1.86402e+06	2.19094	0.00121564	15.1333	268935
2.19804	0.00193561	11.3358	1.65148e+06	2.19768	0.00109413	10.8372	1.85832e+06	2.19767	0.00122049	15.1401	268190
2.20477	0.00193552	11.3426	1.64784e+06	2.20441	0.00108761	10.8439	1.85219e+06	2.2044	0.00122482	15.1468	267449
2.2115	0.00193799	11.3493	1.64331e+06	2.21114	0.00108159	10.8506	1.84634e+06	2.21114	0.00122706	15.1535	266758
2.21824	0.00194082	11.356	1.63894e+06	2.21788	0.00107814	10.8574	1.84055e+06	2.21787	0.00122544	15.1603	266102
2.22497	0.00194155	11.3628	1.63401e+06	2.22461	0.00107662	10.8641	1.8347e+06	2.2246	0.00122061	15.167	265488
2.23171	0.00193789	11.3695	1.62995e+06	2.23135	0.00107498	10.8708	1.82903e+06	2.23134	0.00121526	15.1737	264914
2.23844	0.00192957	11.3762	1.62566e+06	2.23808	0.0010725	10.8776	1.8234e+06	2.23807	0.00121	15.1805	264379
2.24517	0.00191731	11.383	1.62103e+06	2.24481	0.00106926	10.8843	1.81756e+06	2.24481	0.00120722	15.1872	263888
2.25191	0.00190667	11.3897	1.61617e+06	2.25155	0.00106737	10.891	1.81199e+06	2.25154	0.00120846	15.1939	263457
2.25864	0.00190215	11.3964	1.61159e+06	2.25828	0.00106744	10.8978	1.80661e+06	2.25827	0.00121291	15.2007	263032
2.26537	0.00189903	11.4032	1.60709e+06	2.26501	0.00106728	10.9045	1.80101e+06	2.26501	0.00121753	15.2074	262605
2.27211	0.00189624	11.4099	1.60165e+06	2.27175	0.00106639	10.9112	1.79555e+06	2.27174	0.00121919	15.2141	262198
2.27884	0.0018948	11.4166	1.59614e+06	2.27848	0.00106334	10.918	1.79015e+06	2.27848	0.00121579	15.2209	261765
2.28558	0.00189506	11.4234	1.59137e+06	2.28522	0.00105842	10.9247	1.7847e+06	2.28521	0.00120739	15.2276	261317
2.29231	0.00189601	11.4301	1.5876e+06	2.29195	0.0010537	10.9314	1.77934e+06	2.29194	0.00119827	15.2344	260877
2.29904	0.00189682	11.4368	1.58495e+06	2.29868	0.00104928	10.9382	1.77237e+06	2.29868	0.00119108	15.2411	260404
2.30578	0.00189658	11.4436	1.58195e+06	2.30542	0.00104511	10.9449	1.76593e+06	2.30541	0.00118531	15.2478	259952
2.31251	0.0018932	11.4503	1.57745e+06	2.31215	0.0010412	10.9516	1.76318e+06	2.31214	0.00117996	15.2546	259540
2.31924	0.00188399	11.457	1.57323e+06	2.31888	0.00103786	10.9584	1.75998e+06	2.31888	0.0011746	15.2613	259144
2.32598	0.00186871	11.4638	1.56898e+06	2.32562	0.00103518	10.9651	1.75513e+06	2.32561	0.00116947	15.268	258799
2.33271	0.00185023	11.4705	1.56525e+06	2.33235	0.00103294	10.9718	1.75016e+06	2.33235	0.00116589	15.2748	258471
2.33945	0.00183455	11.4772	1.56188e+06	2.33909	0.00103167	10.9786	1.745e+06	2.33908	0.00116377	15.2815	258126
2.34618	0.0018239	11.484	1.55728e+06	2.34582	0.00103202	10.9853	1.73953e+06	2.34581	0.00116094	15.2882	257788
2.35291	0.00181619	11.4907	1.55251e+06	2.35255	0.0010327	10.992	1.73415e+06	2.35255	0.00115627	15.295	257456
2.35965	0.00180944	11.4974	1.54812e+06	2.35929	0.00103213	10.9988	1.72891e+06	2.35928	0.00115213	15.3017	257132
2.36638	0.0018019	11.5042	1.54346e+06	2.36602	0.00102993	11.0055	1.72369e+06	2.36602	0.00115013	15.3084	256851
2.37312	0.00179295	11.5109	1.5379e+06	2.37276	0.0010266	11.0123	1.71871e+06	2.37275	0.00114892	15.3152	256598
2.37985	0.00178241	11.5176	1.53335e+06	2.37949	0.00102266	11.019	1.71396e+06	2.37948	0.00114762	15.3219	256322
2.38658	0.00177345	12.2112	1.10938e+06	2.38622	0.00101793	11.0257	1.70901e+06	2.38622	0.00114567	15.3286	256033
2.39332	0.00176826	12.218	1.10779e+06	2.39296	0.00101372	11.0325	1.70412e+06	2.39295	0.00114113	15.3354	255725
2.40005	0.00176484	12.2247	1.10614e+06	2.39969	0.00101057	11.0392	1.69943e+06	2.39968	0.00113305	15.3421	255404
2.40678	0.00176194	12.2314	1.10422e+06	2.40642	0.00100754	11.0459	1.69447e+06	2.40642	0.00112383	15.3488	255112
2.41352	0.00175945	12.2382	1.10219e+06	2.41316	0.00100469	11.0527	1.68945e+06	2.41315	0.00111528	15.3556	254848
2.42025	0.00175942	12.2449	1.10042e+06	2.41989	0.00100677	11.0594	1.68448e+06	2.41989	0.00110756	15.3623	254580
2.42699	0.00176184	12.2516	1.0988e+06	2.42663	0.00101266	11.0661	1.67961e+06	2.42662	0.00110009	15.369	254317
2.43372	0.00176324	12.2584	1.09708e+06	2.43336	0.0010151	11.0729	1.675e+06	2.43335	0.00109252	15.3758	254064
2.44045	0.00176255	12.2651	1.09523e+06	2.44009	0.0010129	11.0796	1.67037e+06	2.44009	0.00108591	15.3825	253821
2.44719	0.00175899	12.2718	1.09355e+06	2.44683	0.00100816	11.0863	1.66555e+06	2.44682	0.0010816	15.3892	253584
2.45392	0.00175062	12.2786	1.09194e+06	2.45356	0.00100373	11.0931	1.66121e+06	2.45355	0.00107921	15.396	253347
2.46066	0.00173917	12.2853	1.09018e+06	2.4603	0.000999765	11.0998	1.65748e+06	2.46029	0.00107769	15.4027	253105
2.46739	0.00172853	12.292	1.08859e+06	2.46703	0.000999745	11.1065	1.65335e+06	2.46702	0.00107649	15.4094	252864
2.47412	0.00172124	12.2988	1.08717e+06	2.47376	0.00101104	11.1133	1.64885e+06	2.47376	0.0010754	15.4162	252639
2.48086	0.00171786	12.3055	1.08601e+06	2.4805	0.0010294	11.12	1.6443e+06	2.48049	0.00107384	15.4229	252415
2.48759	0.00171597	12.3122	1.08488e+06	2.48723	0.00104446	11.1267	1.63967e+06	2.48722	0.00107118	15.4296	252190
2.49432	0.00171512	12.319	1.08352e+06	2.49396	0.0010504	11.1335	1.63508e+06	2.49396	0.00106655	15.4364	251956
2.50106	0.00172214	12.3257	1.08209e+06	2.5007	0.00104534	11.1402	1.63053e+06	2.50069	0.00106093	15.4431	251716
2.50779	0.00173844	12.3324	1.08056e+06	2.50743	0.00103511	11.1469	1.62593e+06	2.50743	0.00105666	15.4498	251480
2.51453	0.0017582	12.3392	1.07882e+06	2.51417	0.00102278	11.1537	1.62133e+06	2.51416	0.00105334	15.4566	251252
2.52126	0.00177688	12.3459	1.07709e+06	2.5209	0.00100954	11.1604	1.61671e+06	2.52089	0.00105	15.4633	251024
2.52799	0.00178906	12.3526	1.07544e+06	2.52763	0.000997242	11.1671	1.61208e+06	2.52763	0.00104635	15.47	250814
2.53473	0.00179274	12.3594	1.07397e+06	2.53437	0.000986589	11.1739	1.60756e+06	2.53436	0.00104228	15.4768	250633
2.54146	0.00178689	12.3661	1.07263e+06	2.5411	0.000977117	11.1806	1.60313e+06	2.54109	0.00103845	15.4835	250366
2.54819	0.00177181	12.3728	1.07128e+06	2.54783	0.000969052	11.1873	1.59869e+06	2.54783	0.00103562	15.4902	250083
2.55493	0.00175459	12.3796	1.06995e+06	2.55457	0.000962957	11.1941	1.59432e+06	2.55456	0.00103429	15.497	249854
2.56166	0.00174114	12.3863	1.06873e+06	2.5613	0.000958491	11.2008	1.58992e+06	2.5613	0.00103424	15.5037	249629
2.5684	0.00172814	12.393	1.06746e+06	2.56804	0.000953805	11.2075	1.58544e+06	2.56803	0.00103438	15.5104	249391
2.57513	0.00171291	12.3998	1.06631e+06	2.57477	0.000947578	11.2143	1.58117e+06	2.57476	0.00103413	15.5172	249154
2.58186	0.00169349	12.4065	1.06534e+06	2.5815	0.000940456	11.221	1.57695e+06	2.5815	0.00103226	15.5239	248916
2.5886	0.00167305	12.4132	1.0643e+06	2.58824	0.000933941	11.2277	1.57266e+06	2.58823	0.00102747	15.5306	248674
2.59533	0.00165521	12.42	1.06322e+06	2.59497	0.000928692	11.2345	1.56838e+06	2.59497	0.00102096	15.5374	248454
2.60207	0.00164021	12.4267	1.06207e+06	2.60171	0.000924228	11.2412	1.56405e+06	2.6017	0.00101442	15.5441	248301
2.6088	0.0016294	12.4334	1.06074e+06	2.60844	0.00092018	11.2479	1.55989e+06	2.60843	0.00100808	15.5508	248175
2.61553	0.00162258	12.4402	1.05924e+06	2.61517	0.000916438	11.2547	1.55578e+06	2.61517	0.00100184	15.5576	247979
2.62227	0.00161671	12.4469	1.05775e+06	2.62191	0.000913269	11.2614	1.55149e+06	2.6219	0.000995408	15.5643	247739
2.629	0.00161056	12.4536	1.05631e+06	2.62864	0.000910647	11.2681	1.54713e+06	2.62863	0.000988695	15.571	247485
2.63573	0.00160096	12.4604	1.05492e+06	2.63537	0.000908212	11.2749	1.54297e+06	2.63537	0.000982608	15.5778	247225
2.64247	0.00158748	12.4671	1.05364e+06	2.64211	0.000906157	11.2816	1.53882e+06	2.6421	0.000978499	15.5845	246957
2.6492	0.00157522	12.4738	1.05247e+06	2.64884	0.000904242	11.2883	1.53461e+06	2.64884	0.000975677	15.5912	246677
2.65594	0.00156579	12.4806	1.05122e+06	2.65558	0.000901975	11.2951	1.53053e+06	2.65557	0.000972736	15.598	246390
2.66267	0.00155606	12.4873	1.04998e+06	2.66231	0.000899962	11.3018	1.52639e+06	2.6623	0.000969502	15.6047	246092
2.6694	0.00154369	12.4941	1.04872e+06	2.66904	0.000898581	11.3085	1.52212e+06	2.66904	0.000966899	15.6114	245800
2.67614	0.00153018	12.5008	1.04736e+06	2.67578	0.000897483	11.3153	1.51798e+06	2.67577	0.000966437	15.6182	245535
2.68287	0.00152176	12.5075	1.04609e+06	2.68251	0.000896431	11.322	1.51392e+06	2.6825	0.000967109	15.6249	245286
2.68961	0.00152001	12.5143	1.04491e+06	2.68925	0.000895032	11.3287	1.50992e+06	2.68924	0.000967146	15.6316	245056
2.69634	0.00152073	12.521	1.04365e+06	2.69598	0.000893064	11.3355	1.50589e+06	2.69597	0.000966403	15.6384	244840
2.70307	0.00152409	12.5277	1.0425e+06	2.70271	0.000890443	11.3422	1.50162e+06	2.70271	0.000963944	15.6451	244602
2.70981	0.00152881	12.5345	1.04145e+06	2.70945	0.000886957	11.3489	1.49739e+06	2.70944	0.000959215	15.6518	244353
2.71654	0.0015323	12.5412	1.04032e+06	2.71618	0.000882621	11.3557	1.49336e+06	2.71617	0.000955346	15.6586	244113
2.72327	0.00153158	12.5479	1.03908e+06	2.72291	0.000878926	11.3624	1.48939e+06	2.72291	0.000954213	15.6653	243870
2.73001	0.00152541	12.5547	1.03777e+06	2.72965	0.000876395	11.3691	1.48549e+06	2.72964	0.000952814	15.672	243605
2.73674	0.0015163	12.5614	1.03653e+06	2.73638	0.000873907	11.3759	1.48145e+06	2.73638	0.000949069	15.6788	243329
2.74348	0.00150735	12.5681	1.03527e+06	2.74312	0.00087127	11.3826	1.47722e+06	2.74311	0.000944028	15.6855	243044
2.75021	0.00150043	12.5749	1.03397e+06	2.74985	0.000868368	11.3893	1.47306e+06	2.74984	0.000938954	15.6923	242759
2.75694	0.00149414	12.5816	1.03271e+06	2.75658	0.00086511	11.3961	1.46897e+06	2.75658	0.000934007	15.699	242492
2.76368	0.0014876	12.5883	1.03164e+06	2.76332	0.000860857	11.4028	1.46479e+06	2.76331	0.000929407	15.7057	242242
2.77041	0.0014802	12.5951	1.0304e+06	2.77005	0.000856172	11.4095	1.46073e+06	2.77004	0.000925005	15.7125	241985
2.77714	0.0014721	12.6018	1.0291e+06	2.77678	0.000852698	11.4163	1.45682e+06	2.77678	0.000920357	15.7192	241708
2.78388	0.0014669	12.6085	1.02767e+06	2.78352	0.000850535	11.423	1.4529e+06	2.78351	0.000915343	15.7259	241410
2.79061	0.00146504	12.6153	1.02644e+06	2.79025	0.000849073	11.4297	1.44905e+06	2.79025	0.000910878	15.7327	241131
2.79735	0.00146368	12.622	1.02516e+06	2.79699	0.000847792	11.4365	1.44519e+06	2.79698	0.000907259	15.7394	240898
2.80408	0.00146816	12.6287	1.02396e+06	2.80372	0.000846426	11.4432	1.44123e+06	2.80371	0.00090351	15.7461	240646
2.81081	0.00149054	12.6355	1.02276e+06	2.81045	0.000844901	11.4499	1.43727e+06	2.81045	0.000899265	15.7529	240434
2.81755	0.00152663	12.6422	1.02143e+06	2.81719	0.000843232	11.4567	1.43339e+06	2.81718	0.000895638	15.7596	240253
2.82428	0.00155203	12.6489	1.02008e+06	2.82392	0.000842235	11.4634	1.42956e+06	2.82392	0.000894186	15.7663	240005
2.83102	0.00155398	12.6557	1.01882e+06	2.83066	0.000843414	11.4702	1.42559e+06	2.83065	0.00089379	15.7731	239699
2.83775	0.00154137	12.6624	1.01753e+06	2.83739	0.000845944	11.4769	1.42163e+06	2.83738	0.000893037	15.7798	239384
2.84448	0.00152429	12.6691	1.01619e+06	2.84412	0.000846665	11.4836	1.41763e+06	2.84412	0.0008917	15.7865	239053
2.85122	0.00150549	12.6759	1.01488e+06	2.85086	0.000844076	11.4904	1.41371e+06	2.85085	0.000889865	15.7933	238713
2.85795	0.00148663	12.6826	1.01355e+06	2.85759	0.000839682	11.4971	1.40995e+06	2.85758	0.000887663	15.8	238393
2.86468	0.00146787	12.6893	1.01223e+06	2.86432	0.000835048	11.5038	1.40612e+06	2.86432	0.000885011	15.8067	238063
2.87142	0.00145068	12.6961	1.01085e+06	2.87106	0.000829613	11.5106	1.40237e+06	2.87105	0.000881992	15.8135	237731
2.87815	0.00143954	12.7028	1.00943e+06	2.87779	0.00082317	11.5173	1.39857e+06	2.87779	0.000878682	15.8202	237415
2.88489	0.00144189	12.7095	1.00815e+06	2.88453	0.000816603	11.524	1.39467e+06	2.88452	0.000874891	15.8269	237098
2.89162	0.00145291	12.7163	1.007e+06	2.89126	0.000810291	11.5308	1.39082e+06	2.89125	0.000870621	15.8337	236818
2.89835	0.00146139	12.723	1.00581e+06	2.89799	0.000804034	11.5375	1.387e+06	2.89799	0.0008668	15.8404	236548
2.90509	0.00146494	12.7297	1.00473e+06	2.90473	0.000798772	11.5442	1.38317e+06	2.90472	0.000863854	15.8471	236238
2.91182	0.00146279	12.7365	1.00366e+06	2.91146	0.000795634	11.551	1.37938e+06	2.91145	0.000861095	15.8539	235928
2.91856	0.00145426	12.7432	1.00239e+06	2.9182	0.00079367	11.5577	1.37571e+06	2.91819	0.000858138	15.8606	235629
2.92529	0.00144168	12.7499	1.00113e+06	2.92493	0.000791818	11.5644	1.37212e+06	2.92492	0.00085469	15.8673	235327
2.93202	0.00142888	12.7567	999976	2.93166	0.000789636	11.5712	1.3686e+06	2.93166	0.00085046	15.8741	234990
2.93876	0.00141551	12.7634	998732	2.9384	0.000786931	11.5779	1.36502e+06	2.93839	0.000845841	15.8808	234641
2.94549	0.00140173	12.7701	997397	2.94513	0.000784358	11.5846	1.3613e+06	2.94512	0.000841305	15.8875	234292
2.95222	0.00138768	12.7769	996029	2.95186	0.000782154	11.5914	1.35762e+06	2.95186	0.00083672	15.8943	233942
2.95896	0.00137244	12.7836	994624	2.9586	0.000778986	11.5981	1.35401e+06	2.95859	0.000831946
2.96569	0.00135526	12.7903	993253	2.96533	0.000773969	11.6048	1.35038e+06	2.96533	0.000827121
2.97243	0.00133812	12.7971	991770	2.97207	0.000768235	11.6116	1.34684e+06	2.97206	0.000823397
2.97916	0.00132384	12.8038	990265	2.9788	0.000763362	11.6183	1.34338e+06	2.97879	0.000821568
2.98589	0.00131284	12.8105	988972	2.98553	0.000759799	11.625	1.34001e+06	2.98553	0.000820662
2.99263	0.0013041	12.8173	987719	2.99227	0.000757299	11.6318	1.33674e+06	2.99226	0.00081973
2.99936	0.00129651	12.824	986619	2.999	0.000755301	11.6385	1.33348e+06	2.99899	0.000818494
3.00609	0.001289	12.8307	985741	3.00573	0.00075312	11.6452	1.33017e+06	3.00573	0.000817612
3.01283	0.00128111	12.8375	984835	3.01247	0.00075029	11.652	1.32677e+06	3.01246	0.000817269
3.01956	0.00127285	12.8442	983677	3.0192	0.000745507	11.6587	1.32328e+06	3.0192	0.000816914
3.0263	0.00126474	12.8509	982393	3.02594	0.000739399	11.6654	1.31978e+06	3.02593	0.000816726
3.03303	0.00125726	12.8577	981105	3.03267	0.000734478	11.6722	1.31643e+06	3.03266	0.000816571
3.03976	0.00125084	12.8644	979793	3.0394	0.000731122	11.6789	1.31317e+06	3.0394	0.000816023
3.0465	0.00124553	12.8711	978604	3.04614	0.000728854	11.6856	1.30987e+06	3.04613	0.00081501
3.05323	0.00124135	12.8779	977680	3.05287	0.000726753	11.6924	1.3065e+06	3.05286	0.000813059
3.05997	0.0012383	12.8846	976742	3.05961	0.000724229	11.6991	1.30316e+06	3.0596	0.000809782
3.0667	0.00123585	12.8913	975378	3.06634	0.000721024	11.7058	1.29992e+06	3.06633	0.000805819
3.07343	0.00123383	12.8981	973701	3.07307	0.000717039	11.7126	1.29674e+06	3.07307	0.000801837
3.08017	0.00123179	12.9048	971995	3.07981	0.000713556	11.7193	1.29352e+06	3.0798	0.000797842
3.0869	0.00122856	12.9115	970619	3.08654	0.000711563	11.726	1.29028e+06	3.08653	0.000793727
3.09363	0.00122229	12.9183	969350	3.09327	0.000710641	11.7328	1.28707e+06	3.09327	0.000788824
3.10037	0.00121105	12.925	968143	3.10001	0.000710203	11.7395	1.28391e+06	3.1	0.000782311
3.1071	0.00120067	12.9317	967179	3.10674	0.000709671	11.7462	1.28076e+06	3.10674	0.000775027
3.11384	0.00119731			3.11348	0.000708874	11.753	1.27758e+06	3.11347	0.000768164
3.12057	0.00119721			3.12021	0.000707724	11.7597	1.27435e+06	3.1202	0.000761845
3.1273	0.0011963			3.12694	0.000706078	11.7664	1.27112e+06	3.12694	0.000756034
3.13404	0.00119353			3.13368	0.000703	11.7732	1.26798e+06	3.13367	0.000750373
3.14077	0.00118729			3.14041	0.000698952	11.7799	1.26478e+06	3.1404	0.000744595
3.14751	0.00118065			3.14715	0.000695323	11.7866	1.26161e+06	3.14714	0.000739505
3.15424	0.00117966			3.15388	0.000691969	11.7934	1.25846e+06	3.15387	0.000735903
3.16097	0.00118278			3.16061	0.000688784	11.8001	1.25524e+06	3.16061	0.000734313
3.16771	0.00118492			3.16735	0.000686029	11.8068	1.25211e+06	3.16734	0.000737072
3.17444	0.00118436			3.17408	0.000683807	11.8136	1.24909e+06	3.17407	0.000742929
3.18117	0.00117959			3.18081	0.000682293	11.8203	1.24608e+06	3.18081	0.000747898
3.18791	0.00117084			3.18755	0.00068108	11.827	1.24315e+06	3.18754	0.000748695
3.19464	0.00116006			3.19428	0.000679217	11.8338	1.24032e+06	3.19428	0.000745656
3.20138	0.00114556			3.20102	0.000676358	11.8405	1.23742e+06	3.20101	0.000743021
3.20811	0.0011318			3.20775	0.000672305	11.8472	1.23446e+06	3.20774	0.000741026
3.21484	0.00113012			3.21448	0.000669314	11.854	1.23143e+06	3.21448	0.000737912
3.22158	0.00113636			3.22122	0.000668383	11.8607	1.22835e+06	3.22121	0.000732456
3.22831	0.00113983			3.22795	0.000667391	11.8674	1.22529e+06	3.22794	0.000725881
3.23504	0.00113771			3.23468	0.000665591	11.8742	1.22223e+06	3.23468	0.000719509
3.24178	0.00112863			3.24142	0.000662515	11.8809	1.21911e+06	3.24141	0.000713357
3.24851	0.00111594			3.24815	0.00065873	12.5947	804647	3.24815	0.000707336
3.25525	0.0011047			3.25489	0.000655052	12.6014	802757	3.25488	0.00070176
3.26198	0.00109999			3.26162	0.00065111	12.6082	800846	3.26161	0.000697749
3.26871	0.00110601			3.26835	0.00064698	12.6149	798850	3.26835	0.000695313
3.27545	0.00111695			3.27509	0.00064754	12.6216	796880	3.27508	0.000693444
3.28218	0.0011244			3.28182	0.000658411	12.6284	794946	3.28181	0.000692577
3.28892	0.00112579			3.28856	0.000672532	12.6351	793128	3.28855	0.000693245
3.29565	0.00111881			3.29529	0.000680975	12.6418	791395	3.29528	0.000694577
3.30238	0.00110825			3.30202	0.00068128	12.6486	789643	3.30202	0.000695399
3.30912	0.00109921			3.30876	0.00067413	12.6553	787968	3.30875	0.000693536
3.31585	0.00108993			3.31549	0.000664746	12.662	786497	3.31548	0.00068905
3.32258	0.00107919			3.32222	0.000656639	12.6688	785070	3.32222	0.00068511
3.32932	0.00106791			3.32896	0.000649878	12.6755	783635	3.32895	0.000683287
3.33605	0.00105952			3.33569	0.000643354	12.6822	782250	3.33569	0.000683005
3.34279	0.00105436			3.34243	0.000636324	12.689	780817	3.34242	0.000682438
3.34952	0.00104957			3.34916	0.000628517	12.6957	779485	3.34915	0.000681095
3.35625	0.00104538			3.35589	0.000621045	12.7024	778244	3.35589	0.000678325
3.36299	0.00104228			3.36263	0.000614746	12.7092	776962	3.36262	0.000674694
3.36972	0.00103965			3.36936	0.000609889	12.7159	775685	3.36935	0.000671565
3.37646	0.00103637			3.3761	0.000606173	12.7226	774425	3.37609	0.000668796
3.38319	0.00103181			3.38283	0.000602827	12.7294	773111	3.38282	0.000665424
3.38992	0.00102497			3.38956	0.000599558	12.7361	771846	3.38956	0.000660549
3.39666	0.00101561			3.3963	0.000596244	12.7428	770659	3.39629	0.000653486
3.40339	0.00100361			3.40303	0.000592807	12.7496	769490	3.40302	0.000645393
3.41012	0.000988867			3.40976	0.000589285	12.7563	768352	3.40976	0.000638402
3.41686	0.000973971			3.4165	0.000585654	12.763	767274	3.41649	0.000632851
3.42359	0.000961493			3.42323	0.000581727	12.7698	766217	3.42323	0.000629989
3.43033	0.000953243			3.42997	0.00057736	12.7765	765184	3.42996	0.000630814
3.43706	0.000950749			3.4367	0.000575193	12.7832	764176	3.43669	0.000634028
3.44379	0.000955287			3.44343	0.000576213	12.79	763176	3.44343	0.0006363
3.45053	0.000961593			3.45017	0.000577344	12.7967	762301	3.45016	0.000635319
3.45726	0.000962786			3.4569	0.000577583	12.8034	761451	3.45689	0.000631589
3.46399	0.000956789			3.46363	0.000576698	12.8102	760526	3.46363	0.000626219
3.47073	0.000943863			3.47037	0.000574935	12.8169	759587	3.47036	0.000619738
3.47746	0.000930348			3.4771	0.00057295	12.8236	758683	3.4771	0.000612257
3.4842	0.000920353			3.48384	0.000571326	12.8304	757778	3.48383	0.000605408
3.49093	0.000912526			3.49057	0.000569453	12.8371	756827	3.49056	0.000601858
3.49766	0.000905243			3.4973	0.000566191	12.8439	755919	3.4973	0.00060069
3.5044	0.000897578			3.50404	0.000561932	12.8506	755179	3.50403	0.000599328
3.51113	0.000889184			3.51077	0.000557376	12.8573	754399	3.51076	0.000597
3.51787	0.000880615			3.51751	0.000553017	12.8641	753564	3.5175	0.000593702
3.5246	0.000876073			3.52424	0.000549105	12.8708	752733	3.52423	0.000590046
3.53133	0.000880163			3.53097	0.000545793	12.8775	751919	3.53097	0.000585686
3.53807	0.000890018			3.53771	0.000543309	12.8843	751134	3.5377	0.000580695
3.5448	0.000895968			3.54444	0.000541375	12.891	750352	3.54443	0.000575641
3.55153	0.000892337			3.55117	0.000538952	12.8977	749580	3.55117	0.000570344
3.55827	0.000881913			3.55791	0.000535558	12.9045	748814	3.5579	0.000565694
3.565	0.000870009			3.56464	0.000534028	12.9112	748021	3.56464	0.000562383
3.57174	0.000859128			3.57138	0.000534779	12.9179	747247	3.57137	0.000559129
3.57847	0.000849232			3.57811	0.000534897	12.9247	746477	3.5781	0.000555144
3.5852	0.00084346			3.58484	0.000533591	12.9314	745665	3.58484	0.000550489
3.59194	0.000850369			3.59158	0.000530874	12.9381	744858	3.59157	0.000545446
3.59867	0.000876718			3.59831	0.000527262	12.9449	744164	3.5983	0.000540205
3.60541	0.000903766			3.60505	0.000522719	12.9516	743515	3.60504	0.000534341
3.61214	0.000909488			3.61178	0.000517719	12.9583	742641	3.61177	0.000528177
3.61887	0.000900655			3.61851	0.000512523	12.9651	741833	3.61851	0.00052369
3.62561	0.000888742			3.62525	0.00050695	12.9718	741110	3.62524	0.000521546
3.63234	0.000877293			3.63198	0.000503021	12.9785	740349	3.63197	0.000519836
3.63907	0.000865761			3.63871	0.000501545	12.9853	739583	3.63871	0.000517087
3.64581	0.000853532			3.64545	0.00050084	12.992	738800	3.64544	0.000513288
3.65254	0.000841613			3.65218	0.000500339	12.9987	738063	3.65218	0.000512113
3.65928	0.000830904			3.65892	0.000499499	13.0055	737354	3.65891	0.000515467
3.66601	0.000820398			3.66565	0.000498031	13.0122	736591	3.66564	0.000520225
3.67274	0.000809563			3.67238	0.000494855	13.0189	735810	3.67238	0.000524951
3.67948	0.000802664			3.67912	0.000489801	13.0257	735052	3.67911	0.000529038
3.68621	0.000801226			3.68585	0.000484703	13.0324	734328	3.68584	0.000532078
3.69294	0.000800114			3.69258	0.000480228	13.0391	733624	3.69258	0.000531052
3.69968	0.000798092			3.69932	0.000476072	13.0459	732876	3.69931	0.000525055
3.70641	0.000797126			3.70605	0.00047229	13.0526	732023	3.70605	0.000518967
3.71315	0.000796827			3.71279	0.000468481	13.0593	731242	3.71278	0.000514626
3.71988	0.000794343			3.71952	0.000464107	13.0661	730594	3.71951	0.000510712
3.72661	0.000788762			3.72625	0.000459712	13.0728	729905	3.72625	0.000506751
3.73335	0.000784435			3.73299	0.000456882	13.0795	729195	3.73298	0.000500804
3.74008	0.000782979			3.73972	0.000455386	13.0863	728472	3.73971	0.00049321
3.74682	0.000779679			3.74646	0.000453616	13.093	727675	3.74645	0.00048702
3.75355	0.000773123			3.75319	0.00045115	13.0997	726911	3.75318	0.000482191
3.76028	0.000764419			3.75992	0.000448215	13.1065	726287	3.75992	0.000477971
3.76702	0.000755679			3.76666	0.000446438	13.1132	725718	3.76665	0.000475598
3.77375	0.000746934			3.77339	0.00044809	13.1199	725090	3.77338	0.0004749
3.78048	0.00074102			3.78012	0.000452465	13.1267	724439	3.78012	0.000473323
3.78722	0.000738014			3.78686	0.000456175	13.1334	723732	3.78685	0.000469936
3.79395	0.000734248			3.79359	0.000457805	13.1401	722977	3.79359	0.000465513
3.80069	0.000725185			3.80033	0.000457837	13.1469	722231	3.80032	0.000460625
3.80742	0.000712018			3.80706	0.000457391	13.1536	721490	3.80705	0.000455099
3.81415	0.000700253			3.81379	0.00045645	13.1603	720758	3.81379	0.000449373
3.82089	0.000689303			3.82053	0.000454168	13.1671	720032	3.82052	0.000444606
3.82762	0.000678322			3.82726	0.000449793	13.1738	719300	3.82725	0.000441416
3.83436	0.000666585			3.834	0.000444349	13.1805	718567	3.83399	0.000439245
3.84109	0.000653779			3.84073	0.000442831	13.1873	717841	3.84072	0.000437175
3.84782	0.000639906			3.84746	0.000444802	13.194	717056	3.84746	0.000434592
3.85456	0.000627417			3.8542	0.000445707	13.2007	716318	3.85419	0.000431088
3.86129	0.000617733			3.86093	0.000444883	13.2075	715640	3.86092	0.00042632
3.86802	0.0006093			3.86766	0.000442223	13.2142	714931	3.86766	0.000420475
3.87476	0.000601507			3.8744	0.000438872	13.2209	714290	3.87439	0.000414399
3.88149	0.000595374			3.88113	0.000435324	13.2277	713730	3.88113	0.00040952
3.88823	0.000594335			3.88787	0.000430896	13.2344	713081	3.88786	0.000407102
3.89496	0.000602812			3.8946	0.000425403	13.2411	712378	3.89459	0.000406712
3.90169	0.000617416			3.90133	0.000419164	13.2479	711697	3.90133	0.000406476
3.90843	0.000630173			3.90807	0.000412718	13.2546	710978	3.90806	0.000405454
3.91516	0.000639121			3.9148	0.000405881	13.2613	710215	3.91479	0.000402955
3.92189	0.000646978			3.92153	0.000400425	13.2681	709529	3.92153	0.000399181
3.92863	0.000659431			3.92827	0.000398147	13.2748	708885	3.92826	0.000395913
3.93536	0.000676156			3.935	0.000397464	13.2815	708161	3.935	0.000393663
3.9421	0.0006881			3.94174	0.000396507	13.2883	707370	3.94173	0.000393168
3.94883	0.000689463			3.94847	0.000394575	13.295	706519	3.94846	0.000394323
3.95556	0.000678675			3.9552	0.000391366	13.3018	705914	3.9552	0.000395235
3.9623	0.000662924			3.96194	0.000387202	13.3085	705390	3.96193	0.000395405
3.96903	0.000651285			3.96867	0.000382768	13.3152	704637	3.96866	0.000393264
3.97577	0.000642062			3.97541	0.000377458	13.322	701763	3.9754	0.000389528
3.9825	0.000631208			3.98214	0.000370689			3.98213	0.000386442
3.98923	0.000616006			3.98887	0.000363484			3.98887	0.000382552
3.99597	0.000599765			3.99561	0.000357279			3.9956	0.000376679
4.0027	0.000586646			4.00234	0.000353971			4.00233	0.000370634
4.00943	0.000577832			4.00907	0.000353824			4.00907	0.000365826
4.01617	0.000572361			4.01581	0.000353808			4.0158	0.000361861
4.0229	0.000568585			4.02254	0.000352141			4.02254	0.000360436
4.02964	0.000566016			4.02928	0.000349483			4.02927	0.000362205
4.03637	0.00056428			4.03601	0.000346203			4.036	0.000364055
4.0431	0.000564624			4.04274	0.000341971			4.04274	0.000363755
4.04984	0.000567104			4.04948	0.000337629			4.04947	0.000360077
4.05657	0.000569496			4.05621	0.000333713			4.0562	0.00035318
4.06331	0.000568653			4.06295	0.000329814			4.06294	0.00034561
4.07004	0.000561952			4.06968	0.000325493			4.06967	0.000338942
4.07677	0.000549611			4.07641	0.000321538			4.07641	0.000333225
4.08351	0.000534136			4.08315	0.000320558			4.08314	0.000328107
4.09024	0.000519096			4.08988	0.000322503			4.08987	0.000324059
4.09697	0.00050515			4.09661	0.000323232			4.09661	0.000321486
4.10371	0.000491571			4.10335	0.000320085			4.10334	0.000319668
4.11044	0.000477242			4.11008	0.000314659			4.11008	0.000317854
4.11718	0.000462826			4.11682	0.000309398			4.11681	0.000315829
4.12391	0.000449665			4.12355	0.000305266			4.12354	0.000312647
4.13064	0.000437111			4.13028	0.000301635			4.13028	0.000308268
4.13738	0.000424862			4.13702	0.000297614			4.13701	0.000304518
4.14411	0.000412448			4.14375	0.000292961			4.14374	0.000301673
4.15084	0.00039849			4.15048	0.000288209			4.15048	0.000298272
4.15758	0.000383352			4.15722	0.000284025			4.15721	0.000293555
4.16431	0.000372059			4.16395	0.000280288			4.16395	0.000288309
4.17105	0.000366592			4.17069	0.000277236			4.17068	0.000283383
4.17778	0.000364683			4.17742	0.000274953			4.17741	0.000278974
4.18451	0.000364798			4.18415	0.000273176			4.18415	0.000276638
4.19125	0.000365166			4.19089	0.000271785			4.19088	0.000276871
4.19798	0.000365255			4.19762	0.000270705			4.19761	0.000276364
4.20472	0.00036736			4.20436	0.000269712			4.20435	0.000272921
4.21145	0.000371264			4.21109	0.000268102			4.21108	0.000269476
4.21818	0.000373902			4.21782	0.000265356			4.21782	0.000268569
4.22492	0.000373959			4.22456	0.000261296			4.22455	0.000268801
4.23165	0.000371878			4.23129	0.000255453			4.23128	0.000268717
4.23838	0.00036974			4.23802	0.000249633			4.23802	0.000267764
4.24512	0.00037077			4.24476	0.000246683			4.24475	0.0002655
4.25185	0.000374835			4.25149	0.000246015			4.25149	0.000262418
4.25859	0.000377959			4.25823	0.000246109			4.25822	0.000259086
4.26532	0.000376973			4.26496	0.000245911			4.26495	0.000254912
4.27205	0.000371084			4.27169	0.000244471			4.27169	0.000248877
4.27879	0.000362301			4.27843	0.000241244			4.27842	0.000241804
4.28552	0.000350477			4.28516	0.000236352			4.28515	0.000236688
4.29226	0.000335495			4.2919	0.000231599			4.29189	0.00023444
4.29899	0.000320714			4.29863	0.000228708			4.29862	0.000233721
4.30572	0.000308221			4.30536	0.000228106			4.30536	0.000231734
4.31246	0.000295743			4.3121	0.000228335			4.31209	0.000226825
4.31919	0.000281786			4.31883	0.000227847			4.31882	0.000220146
4.32592	0.000266727			4.32556	0.000226292			4.32556	0.000214027
4.33266	0.00025259			4.3323	0.000223499			4.33229	0.00020904
4.33939	0.000240989			4.33903	0.000220069			4.33903	0.000204326
4.34613	0.000232168			4.34577	0.000216615			4.34576	0.000199759
4.35286	0.000224759			4.3525	0.000213026			4.35249	0.000196511
4.35959	0.000220313			4.35923	0.000209094			4.35923	0.000194954
4.36633	0.00021944			4.36597	0.00020485			4.36596	0.000193518
4.37306	0.000220693			4.3727	0.000201099			4.37269	0.000191632
4.37979	0.000224023			4.37943	0.000199559			4.37943	0.00019013
4.38653	0.000227522			4.38617	0.000199953			4.38616	0.000188916
4.39326	0.000228789			4.3929	0.000199293			4.3929	0.00018684
4.4	0.000227713			4.39964	0.000195922			4.39963	0.00018331
4.40673	0.000224876			4.40637	0.000191069			4.40636	0.000179135
4.41346	0.000220915			4.4131	0.000186534			4.4131	0.0001755
4.4202	0.000214917			4.41984	0.000182856			4.41983	0.000171619
4.42693	0.000204436			4.42657	0.000179701			4.42656	0.000166951
4.43367	0.000192021			4.43331	0.000176437			4.4333	0.000161943
4.4404	0.000181553			4.44004	0.000172702			4.44003	0.000157079
4.44713	0.000172029			4.44677	0.000168747			4.44677	0.000152349
4.45387	0.000162977			4.45351	0.000164841			4.4535	0.000148518
4.4606	0.00015409			4.46024	0.000160964			4.46023	0.000146647
4.46733	0.000145132			4.46697	0.000158006			4.46697	0.000146196
4.47407	0.000135945			4.47371	0.000156709			4.4737	0.00014549
4.4808	0.000124408			4.48044	0.000156489			4.48044	0.00014356
4.48754	0.00011063			4.48718	0.000157057			4.48717	0.000140489
4.49427	9.96806e-05			4.49391	0.000159228			4.4939	0.000136948
4.501	9.50075e-05			4.50064	0.000162121			4.50064	0.000133614
4.50774	9.39419e-05			4.50738	0.000163696			4.50737	0.000130732
4.51447	9.14109e-05			4.51411	0.000163721			4.5141	0.000128257
4.52121	8.60132e-05			4.52085	0.000162095			4.52084	0.000125847
4.52794	8.05381e-05			4.52758	0.000158665			4.52757	0.0001234
4.53467	7.80156e-05			4.53431	0.000155117			4.53431	0.000120885
4.54141	7.64948e-05			4.54105	0.00015234			4.54104	0.000118712
4.54814	7.33021e-05			4.54778	0.000148983			4.54777	0.000118244
4.55487	6.75447e-05			4.55451	0.000144671			4.55451	0.000118928
4.56161	6.05236e-05			4.56125	0.000139427			4.56124	0.000118829
4.56834	5.42004e-05			4.56798	0.000133646			4.56798	0.000116091
4.57508	4.80797e-05			4.57472	0.000127914			4.57471	0.000110072
4.58181	4.15432e-05			4.58145	0.000123256			4.58144	0.000103177
4.58854	3.23027e-05			4.58818	0.000119552			4.58818	9.76549e-05
4.59528	4.28883e-05			4.59492	0.000115908			4.59491	9.38318e-05
4.60201	0.000104567			4.60165	0.00011116			4.60164	9.06289e-05
4.60874	0.00017169			4.60838	0.000105176			4.60838	8.74111e-05
4.61548	0.000188014			4.61512	9.90581e-05			4.61511	8.3954e-05
4.62221	0.000171041			4.62185	9.26263e-05			4.62185	8.04585e-05
4.62895	0.000147672			4.62859	8.64326e-05			4.62858	7.82435e-05
4.63568	0.000125581			4.63532	8.12859e-05			4.63531	8.03457e-05
4.64241	0.00010736			4.64205	7.68132e-05			4.64205	8.56241e-05
4.64915	9.42853e-05			4.64879	7.2758e-05			4.64878	9.03199e-05
4.65588	8.2593e-05			4.65552	6.97497e-05			4.65551	9.38822e-05
4.66262	6.87743e-05			4.66226	6.77423e-05			4.66225	9.66091e-05
4.66935	5.1662e-05			4.66899	6.56993e-05			4.66898	9.89327e-05
4.67608	3.26239e-05			4.67572	6.33169e-05			4.67572	0.00010052
4.68282	1.4897e-05			4.68246	6.03747e-05			4.68245	9.89076e-05
4.68955	-1.27956e-06			4.68919	5.68049e-05			4.68918	9.34738e-05
4.69628	-1.63476e-05			4.69592	5.32021e-05			4.69592	8.66526e-05
4.70302	-2.71686e-05			4.70266	5.01795e-05			4.70265	8.0926e-05
4.70975	-3.27077e-05			4.70939	4.91868e-05			4.70939	7.83822e-05
4.71649	-3.56384e-05			4.71613	5.03294e-05			4.71612	7.71838e-05
4.72322	-3.54123e-05			4.72286	5.04823e-05			4.72285	7.52436e-05
4.72995	-3.14155e-05			4.72959	4.78792e-05			4.72959	7.1737e-05
4.73669	-2.54676e-05			4.73633	4.38831e-05			4.73632	6.71208e-05
4.74342	-1.92192e-05			4.74306	3.99516e-05			4.74305	6.26569e-05
4.75016	-1.1884e-05			4.7498	3.61244e-05			4.74979	5.8241e-05
4.75689	-4.62759e-06			4.75653	3.21002e-05			4.75652	5.22062e-05
4.76362	-5.34037e-07			4.76326	2.77264e-05			4.76326	4.39957e-05
4.77036	-7.85729e-06			4.77	2.32007e-05			4.76999	3.53865e-05
4.77709	-2.87034e-05			4.77673	1.88742e-05			4.77672	2.65094e-05
4.78382	-5.03888e-05			4.78346	1.47558e-05			4.78346	1.87033e-05
4.79056	-6.70115e-05			4.7902	1.0521e-05			4.79019	1.42121e-05
4.79729	-7.97713e-05			4.79693	6.71629e-06			4.79693	1.14945e-05
4.80403	-8.48185e-05			4.80367	4.01816e-06			4.80366	8.48735e-06
4.81076	-8.13905e-05			4.8104	2.07932e-06			4.81039	4.81058e-06
4.81749	-8.16984e-05			4.81713	3.47164e-07			4.81713	8.15254e-07
4.82423	-9.41136e-05			4.82387	-1.23035e-06			4.82386	-2.86709e-06
4.83096	-0.000110861			4.8306	-2.88442e-06			4.83059	-6.03267e-06
4.83769	-0.000124055			4.83733	-4.87574e-06			4.83733	-6.58875e-06
4.84443	-0.000134578			4.84407	-7.12763e-06			4.84406	-6.07805e-06
4.85116	-0.000143807			4.8508	-9.56991e-06			4.8508	-8.62626e-06
4.8579	-0.000153578			4.85754	-1.25301e-05			4.85753	-1.35292e-05
4.86463	-0.000165199			4.86427	-1.59505e-05			4.86426	-1.8901e-05
4.87136	-0.000177283			4.871	-1.8436e-05			4.871	-2.38343e-05
4.8781	-0.000188261			4.87774	-1.87458e-05			4.87773	-2.86269e-05
4.88483	-0.00019737			4.88447	-1.72016e-05			4.88446	-3.35311e-05
4.89157	-0.000204995			4.89121	-1.56264e-05			4.8912	-3.87485e-05
4.8983	-0.000212434			4.89794	-1.54068e-05			4.89793	-4.44463e-05
4.90503	-0.000220223			4.90467	-1.62338e-05			4.90467	-4.98608e-05
4.91177	-0.000230073			4.91141	-1.77151e-05			4.9114	-5.41994e-05
4.9185	-0.000241767			4.91814	-2.02088e-05			4.91813	-5.61874e-05
4.92523	-0.000252901			4.92487	-2.3023e-05			4.92487	-5.59234e-05
4.93197	-0.000263227			4.93161	-2.53855e-05			4.9316	-5.54678e-05
4.9387	-0.000273166			4.93834	-2.79846e-05			4.93834	-5.59133e-05
4.94544	-0.00028154			4.94508	-3.27831e-05			4.94507	-5.77106e-05
4.95217	-0.000287946			4.95181	-3.97557e-05			4.9518	-5.78628e-05
4.9589	-0.00029496			4.95854	-4.52237e-05			4.95854	-5.57894e-05
4.96564	-0.000304351			4.96528	-4.86985e-05			4.96527	-5.44685e-05
4.97237	-0.000314763			4.97201	-5.18986e-05			4.972	-5.58059e-05
4.97911	-0.000323334			4.97875	-5.52665e-05			4.97874	-5.99194e-05
4.98584	-0.000327188			4.98548	-5.92354e-05			4.98547	-6.49147e-05
4.99257	-0.000327808			4.99221	-6.27858e-05			4.99221	-7.00586e-05
4.99931	-0.000328667			4.99895	-6.50191e-05			4.99894	-7.42282e-05
5.00604	-0.000330185			5.00568	-6.69216e-05			5.00567	-7.73859e-05
5.01277	-0.000332325			5.01241	-6.9017e-05			5.01241	-8.01486e-05
5.01951	-0.000334933			5.01915	-7.1564e-05			5.01914	-8.23821e-05
5.02624	-0.000338327			5.02588	-7.47762e-05			5.02588	-8.35126e-05
5.03298	-0.000342036			5.03262	-7.89881e-05			5.03261	-8.43882e-05
5.03971	-0.00034551			5.03935	-8.37147e-05			5.03934	-8.66295e-05
5.04644	-0.000350373			5.04608	-8.83029e-05			5.04608	-9.01529e-05
5.05318	-0.000357913			5.05282	-9.27597e-05			5.05281	-9.46922e-05
5.05991	-0.000367342			5.05955	-9.66532e-05			5.05954	-9.98447e-05
5.06664	-0.000375122			5.06628	-9.83286e-05			5.06628	-0.000105206
5.07338	-0.000377314			5.07302	-9.8313e-05			5.07301	-0.000110492
5.08011	-0.000374844			5.07975	-9.88018e-05			5.07975	-0.000113275
5.08685	-0.000370624			5.08649	-0.000100177			5.08648	-0.000112617
5.09358	-0.000366891			5.09322	-0.000102665			5.09321	-0.000111557
5.10031	-0.000365475			5.09995	-0.000106294			5.09995	-0.000111849
5.10705	-0.000370105			5.10669	-0.000111416			5.10668	-0.000114853
5.11378	-0.000379723			5.11342	-0.000116591			5.11341	-0.000121179
5.12052	-0.000389011			5.12016	-0.000120531			5.12015	-0.00012865
5.12725	-0.00039811			5.12689	-0.000123948			5.12688	-0.000134635
5.13398	-0.000407368			5.13362	-0.000126979			5.13362	-0.000138533
5.14072	-0.000416348			5.14036	-0.000130241			5.14035	-0.000141392
5.14745	-0.000423955			5.14709	-0.00013414			5.14708	-0.000144133
5.15418	-0.00042986			5.15382	-0.000138278			5.15382	-0.000147251
5.16092	-0.000435409			5.16056	-0.000141597			5.16055	-0.000150862
5.16765	-0.000441584			5.16729	-0.000143815			5.16729	-0.000155631
5.17439	-0.000446946			5.17403	-0.000145433			5.17402	-0.000160545
5.18112	-0.000450753			5.18076	-0.000146114			5.18075	-0.000164128
5.18785	-0.000453822			5.18749	-0.000145939			5.18749	-0.000167056
5.19459	-0.000454694			5.19423	-0.000145865			5.19422	-0.000170167
5.20132	-0.000452322			5.20096	-0.000146391			5.20095	-0.00017398
5.20805	-0.000449183			5.2077	-0.000147827			5.20769	-0.000178364
5.21479	-0.000447648			5.21443	-0.000150107			5.21442	-0.000181728
5.22152	-0.000450059			5.22116	-0.000152815			5.22116	-0.00018294
5.22826	-0.00045822			5.2279	-0.000156367			5.22789	-0.000182668
5.23499	-0.00046871			5.23463	-0.000161732			5.23462	-0.000181881
5.24172	-0.000478371			5.24136	-0.000168079			5.24136	-0.000181548
5.24846	-0.000487655			5.2481	-0.000172221			5.24809	-0.000182756
5.25519	-0.000497011			5.25483	-0.000172691			5.25483	-0.000185684
5.26193	-0.000506762			5.26157	-0.000169673			5.26156	-0.000189248
5.26866	-0.000517173			5.2683	-0.000165769			5.26829	-0.000192758
5.27539	-0.000527846			5.27503	-0.000164207			5.27503	-0.000195795
5.28213	-0.000535433			5.28177	-0.000164178			5.28176	-0.000198792
5.28886	-0.000530936			5.2885	-0.000164568			5.28849	-0.00020205
5.29559	-0.000518997			5.29523	-0.00016528			5.29523	-0.000205172
5.30233	-0.00051272			5.30197	-0.000166385			5.30196	-0.000206958
5.30906	-0.000515413			5.3087	-0.000167949			5.3087	-0.000199809
5.3158	-0.00052262			5.31544	-0.000170302			5.31543	-0.000180638
5.32253	-0.000525025			5.32217	-0.00017391			5.32216	-0.000163876
5.32926	-0.000523839			5.3289	-0.000178287			5.3289	-0.000160167
5.336	-0.000523091			5.33564	-0.00018277			5.33563	-0.000165175
5.34273	-0.000523235			5.34237	-0.000188166			5.34236	-0.000172263
5.34947	-0.000525301			5.34911	-0.000193878			5.3491	-0.000179322
5.3562	-0.000530292			5.35584	-0.000198686			5.35583	-0.000186911
5.36293	-0.000538354			5.36257	-0.000203069			5.36257	-0.000195125
5.36967	-0.000547859			5.36931	-0.000207098			5.3693	-0.000203437
5.3764	-0.000556419			5.37604	-0.000210789			5.37603	-0.000212747
5.38313	-0.000564107			5.38277	-0.000214587			5.38277	-0.000222807
5.38987	-0.0005716			5.38951	-0.000218984			5.3895	-0.000231688
5.3966	-0.000579259			5.39624	-0.000224244			5.39624	-0.000238487
5.40334	-0.000586786			5.40298	-0.000229741			5.40297	-0.000242733
5.41007	-0.000593825			5.40971	-0.000233995			5.4097	-0.000244806
5.4168	-0.00060077			5.41644	-0.000237258			5.41644	-0.000246055
5.42354	-0.000608479			5.42318	-0.000240557			5.42317	-0.0002473
5.43027	-0.00061956			5.42991	-0.000244292			5.4299	-0.000248979
5.437	-0.00063331			5.43665	-0.000249171			5.43664	-0.000251483
5.44374	-0.000642055			5.44338	-0.00025414			5.44337	-0.000255131
5.45047	-0.000644876			5.45011	-0.000257236			5.45011	-0.000260342
5.45721	-0.000647003			5.45685	-0.000258961			5.45684	-0.000266279
5.46394	-0.000649374			5.46358	-0.000260358			5.46357	-0.00027183
5.47067	-0.000652466			5.47031	-0.000261577			5.47031	-0.000277077
5.47741	-0.00065754			5.47705	-0.000262919			5.47704	-0.000282259
5.48414	-0.000666237			5.48378	-0.000264699			5.48378	-0.000287622
5.49088	-0.000677922			5.49052	-0.000267142			5.49051	-0.000293063
5.49761	-0.000691091			5.49725	-0.000270246			5.49724	-0.000298357
5.50434	-0.000703427			5.50398	-0.000272886			5.50398	-0.000303654
5.51108	-0.000713136			5.51072	-0.000274593			5.51071	-0.000308725
5.51781	-0.000720305			5.51745	-0.000276126			5.51744	-0.000312833
5.52454	-0.00072373			5.52418	-0.000277941			5.52418	-0.000315969
5.53128	-0.000725093			5.53092	-0.000280222			5.53091	-0.000318696
5.53801	-0.000727642			5.53765	-0.000282153			5.53765	-0.000320129
5.54475	-0.00073264			5.54439	-0.000282359			5.54438	-0.000319485
5.55148	-0.000740185			5.55112	-0.000281878			5.55111	-0.00031797
5.55821	-0.000747062			5.55785	-0.000282737			5.55785	-0.000316916
5.56495	-0.000751776			5.56459	-0.000286372			5.56458	-0.000316593
5.57168	-0.000756269			5.57132	-0.000292499			5.57131	-0.000317542
5.57842	-0.000761503			5.57806	-0.000297113			5.57805	-0.00032094
5.58515	-0.000766366			5.58479	-0.000297938			5.58478	-0.000326841
5.59188	-0.000770939			5.59152	-0.000296551			5.59152	-0.000333586
5.59862	-0.000776717			5.59826	-0.000294056			5.59825	-0.000340149
5.60535	-0.000784514			5.60499	-0.000292057			5.60498	-0.000346892
5.61208	-0.000792635			5.61172	-0.000292969			5.61172	-0.000353217
5.61882	-0.000798967			5.61846	-0.000298623			5.61845	-0.0003577
5.62555	-0.000804163			5.62519	-0.000307204			5.62519	-0.000360094
5.63229	-0.000808157			5.63193	-0.000312673			5.63192	-0.000361697
5.63902	-0.000812049			5.63866	-0.000314846			5.63865	-0.000363812
5.64575	-0.000817426			5.64539	-0.000316951			5.64539	-0.000366996
5.65249	-0.000825416			5.65213	-0.000319886			5.65212	-0.000370731
5.65922	-0.000834306			5.65886	-0.000323389			5.65885	-0.000374033
5.66595	-0.000840528			5.6656	-0.000327232			5.66559	-0.000377122
5.67269	-0.00084478			5.67233	-0.00033247			5.67232	-0.000380397
5.67942	-0.000848881			5.67906	-0.000339048			5.67906	-0.000384107
5.68616	-0.000853283			5.6858	-0.000345606			5.68579	-0.000387747
5.69289	-0.000858411			5.69253	-0.000351972			5.69252	-0.0003907
5.69962	-0.000864439			5.69926	-0.000357553			5.69926	-0.000392228
5.70636	-0.000871156			5.706	-0.000362258			5.70599	-0.000393688
5.71309	-0.000879406			5.71273	-0.000366727			5.71273	-0.000397395
5.71983	-0.000886355			5.71947	-0.000371069			5.71946	-0.000403105
5.72656	-0.00088937			5.7262	-0.000375083			5.72619	-0.000408387
5.73329	-0.000890316			5.73293	-0.000378644			5.73293	-0.000410745
5.74003	-0.000890157			5.73967	-0.000381901			5.73966	-0.000410995
5.74676	-0.000891034			5.7464	-0.000384538			5.74639	-0.000410844
5.75349	-0.000894631			5.75313	-0.000385892			5.75313	-0.000411238
5.76023	-0.000901275			5.75987	-0.000386346			5.75986	-0.000412615
5.76696	-0.00090917			5.7666	-0.000386482			5.7666	-0.000415204
5.7737	-0.000915911			5.77334	-0.000386904			5.77333	-0.000417686
5.78043	-0.000920801			5.78007	-0.000388524			5.78006	-0.000412806
5.78716	-0.000924805			5.7868	-0.000391086			5.7868	-0.000403894
5.7939	-0.000929619			5.79354	-0.000395033			5.79353	-0.00040169
5.80063	-0.000933528			5.80027	-0.000399901			5.80026	-0.000404165
5.80737	-0.000935809			5.80701	-0.000404403			5.807	-0.000408363
5.8141	-0.000938032			5.81374	-0.000408655			5.81373	-0.00041408
5.82083	-0.000940815			5.82047	-0.000412632			5.82047	-0.000421678
5.82757	-0.000946804			5.82721	-0.000416221			5.8272	-0.000430483
5.8343	-0.000955118			5.83394	-0.000419347			5.83393	-0.000438886
5.84103	-0.000947958			5.84067	-0.000421633			5.84067	-0.00044653
5.84777	-0.000925521			5.84741	-0.000423202			5.8474	-0.000453473
5.8545	-0.000906801			5.85414	-0.000425503			5.85414	-0.000458612
5.86124	-0.000900037			5.86088	-0.00042944			5.86087	-0.000461562
5.86797	-0.00090564			5.86761	-0.000434048			5.8676	-0.000463264
5.8747	-0.000915173			5.87434	-0.000438032			5.87434	-0.000463658
5.88144	-0.000926291			5.88108	-0.000441088			5.88107	-0.000463798
5.88817	-0.000936894			5.88781	-0.00044355			5.8878	-0.000465125
5.8949	-0.000941892			5.89455	-0.000445526			5.89454	-0.000467466
5.90164	-0.000941042			5.90128	-0.000447058			5.90127	-0.000468673
5.90837	-0.000938234			5.90801	-0.000447825			5.90801	-0.00046858
5.91511	-0.00093228			5.91475	-0.000447781			5.91474	-0.000469452
5.92184	-0.000924861			5.92148	-0.000448124			5.92147	-0.000471876
5.92857	-0.000920251			5.92821	-0.000449428			5.92821	-0.000475543
5.93531	-0.000923768			5.93495	-0.00045159			5.93494	-0.000479617
5.94204	-0.00093975			5.94168	-0.00045391			5.94168	-0.000484354
5.94878	-0.000963409			5.94842	-0.000455149			5.94841	-0.000490048
5.95551	-0.000986702			5.95515	-0.000454991			5.95514	-0.000496346
5.96224	-0.0010051			5.96188	-0.000454838			5.96188	-0.000502818
5.96898	-0.00102015			5.96862	-0.000455906			5.96861	-0.000509341
5.97571	-0.00103423			5.97535	-0.000458473			5.97534	-0.000516082
5.98244	-0.00104447			5.98208	-0.000460941			5.98208	-0.000522629
5.98918	-0.00104707			5.98882	-0.00046208			5.98881	-0.000528011
5.99591	-0.00104358			5.99555	-0.000462992			5.99555	-0.000531895
6.00265	-0.00103871			6.00229	-0.000464384			6.00228	-0.000534207
6.00938	-0.00103756			6.00902	-0.000466716			6.00901	-0.000534713
6.01611	-0.00104298			6.01575	-0.00047029			6.01575	-0.00053441
6.02285	-0.00105345			6.02249	-0.000474946			6.02248	-0.000534642
6.02958	-0.00106564			6.02922	-0.000478611			6.02921	-0.000535869
6.03632	-0.00107744			6.03596	-0.000479439			6.03595	-0.000538619
6.04305	-0.00109006			6.04269	-0.00047882			6.04268	-0.000543152
6.04978	-0.00110342			6.04942	-0.000478691			6.04942	-0.0005488
6.05652	-0.00111568			6.05616	-0.000480624			6.05615	-0.000554455
6.06325	-0.00112425			6.06289	-0.000484548			6.06288	-0.00055896
6.06998	-0.00112724			6.06962	-0.000488708			6.06962	-0.000561485
6.07672	-0.00112947			6.07636	-0.000493348			6.07635	-0.000562668
6.08345	-0.00113589			6.08309	-0.00049818			6.08309	-0.000563117
6.09019	-0.00114786			6.08983	-0.000502972			6.08982	-0.000562301
6.09692	-0.00116273			6.09656	-0.000508319			6.09655	-0.000560406
6.10365	-0.00117535			6.10329	-0.000513546			6.10329	-0.000558612
6.11039	-0.00118609			6.11003	-0.000516301			6.11002	-0.000557574
6.11712	-0.00119653			6.11676	-0.000517036			6.11675	-0.000557649
6.12385	-0.00120327			6.12349	-0.000518426			6.12349	-0.000559225
6.13059	-0.00120481			6.13023	-0.000521034			6.13022	-0.000563877
6.13732	-0.00120368			6.13696	-0.000524527			6.13696	-0.000570929
6.14406	-0.00119892			6.1437	-0.000528131			6.14369	-0.000577432
6.15079	-0.00119163			6.15043	-0.00053194			6.15042	-0.0005827
6.15752	-0.00118691			6.15716	-0.000535762			6.15716	-0.000587688
6.16426	-0.00118743			6.1639	-0.000539349			6.16389	-0.000593195
6.17099	-0.00119376			6.17063	-0.000542893			6.17062	-0.000599036
6.17773	-0.00120376			6.17737	-0.000546562			6.17736	-0.000603483
6.18446	-0.00121351			6.1841	-0.000550484			6.18409	-0.000605882
6.19119	-0.00122226			6.19083	-0.000554456			6.19083	-0.000607719
6.19793	-0.00123029			6.19757	-0.000558028			6.19756	-0.00060951
6.20466	-0.00123674			6.2043	-0.000561086			6.20429	-0.000611354
6.21139	-0.00124131			6.21103	-0.000563724			6.21103	-0.000613343
6.21813	-0.00124454			6.21777	-0.000564604			6.21776	-0.000615813
6.22486	-0.00124364			6.2245	-0.000563425			6.2245	-0.000618233
6.2316	-0.00123793			6.23124	-0.000562059			6.23123	-0.000619639
6.23833	-0.00123293			6.23797	-0.000561329			6.23796	-0.000620167
6.24506	-0.00123215			6.2447	-0.000561513			6.2447	-0.000620286
6.2518	-0.00123643			6.25144	-0.000563803			6.25143	-0.000620884
6.25853	-0.00124356			6.25817	-0.00056684			6.25816	-0.000622549
6.26527	-0.00125028			6.26491	-0.000568657			6.2649	-0.0006246
6.272	-0.0012568			6.27164	-0.000570701			6.27163	-0.000626413
6.27873	-0.00126346			6.27837	-0.000573861			6.27837	-0.000628212
6.28547	-0.00127076			6.28511	-0.000578514			6.2851	-0.000630176
6.2922	-0.00128146			6.29184	-0.00058354			6.29183	-0.000632441
6.29893	-0.00129563			6.29857	-0.000587755			6.29857	-0.00063506
6.30567	-0.00130881			6.30531	-0.000591767			6.3053	-0.000637687
6.3124	-0.00131991			6.31204	-0.000595747			6.31204	-0.000640235
6.31914	-0.00133011			6.31878	-0.000599587			6.31877	-0.00064297
6.32587	-0.00133928			6.32551	-0.00060299			6.3255	-0.000646215
6.3326	-0.00134718			6.33224	-0.000605961			6.33224	-0.000651036
6.33934	-0.00135404			6.33898	-0.000608806			6.33897	-0.00065688
6.34607	-0.00135938			6.34571	-0.000611647			6.3457	-0.000662106
6.3528	-0.0013639			6.35244	-0.000614515			6.35244	-0.000666821
6.35954	-0.0013694			6.35918	-0.000617445			6.35917	-0.000671352
6.36627	-0.0013774			6.36591	-0.00062054			6.36591	-0.000675909
6.37301	-0.00138774			6.37265	-0.00062403			6.37264	-0.000680686
6.37974	-0.00139536			6.37938	-0.000628065			6.37937	-0.000685859
6.38647	-0.0013986			6.38611	-0.000632882			6.38611	-0.000690842
6.39321	-0.00140055			6.39285	-0.000637789			6.39284	-0.000693746
6.39994	-0.00140371			6.39958	-0.000641959			6.39957	-0.000694276
6.40668	-0.00140936			6.40632	-0.000645722			6.40631	-0.000693751
6.41341	-0.00141236			6.41305	-0.000649272			6.41304	-0.000693276
6.42014	-0.00141057			6.41978	-0.000652831			6.41978	-0.000693713
6.42688	-0.00140974			6.42652	-0.000656524			6.42651	-0.00069569
6.43361	-0.0014125			6.43325	-0.000659749			6.43324	-0.00069827
6.44034	-0.0014181			6.43998	-0.000662004			6.43998	-0.000700049
6.44708	-0.00142566			6.44672	-0.000663213			6.44671	-0.000701534
6.45381	-0.0014357			6.45345	-0.000663565			6.45345	-0.0007034
6.46055	-0.0014461			6.46019	-0.000663601			6.46018	-0.000706164
6.46728	-0.00145464			6.46692	-0.000663856			6.46691	-0.000710581
6.47401	-0.00146251			6.47365	-0.000664867			6.47365	-0.000716184
6.48075	-0.00147011			6.48039	-0.000667382			6.48038	-0.000721523
6.48748	-0.00147764			6.48712	-0.000671968			6.48711	-0.000726429
6.49422	-0.00148457			6.49386	-0.000676654			6.49385	-0.00073073
6.50095	-0.00148938			6.50059	-0.000679627			6.50058	-0.000733393
6.50768	-0.00149262			6.50732	-0.000681947			6.50732	-0.000734188
6.51442	-0.00149592			6.51406	-0.000684732			6.51405	-0.000734385
6.52115	-0.00149968			6.52079	-0.000688395			6.52078	-0.000734547
6.52788	-0.0015047			6.52752	-0.000689632			6.52752	-0.000735026
6.53462	-0.00151123			6.53426	-0.000676693			6.53425	-0.000736154
6.54135	-0.00151825			6.54099	-0.000648588			6.54099	-0.000738258
6.54809	-0.00152448			6.54773	-0.000620078			6.54772	-0.000741351
6.55482	-0.00152934			6.55446	-0.000599022			6.55445	-0.000743747
6.56155	-0.00153319			6.56119	-0.000591216			6.56119	-0.000745113
6.56829	-0.00153612			6.56793	-0.000596906			6.56792	-0.000746833
6.57502	-0.00153883			6.57466	-0.00060795			6.57465	-0.000749255
6.58175	-0.00154255			6.58139	-0.000620737			6.58139	-0.000752965
6.58849	-0.0015482			6.58813	-0.000633643			6.58812	-0.000757793
6.59522	-0.00155543			6.59486	-0.000645971			6.59486	-0.000762439
6.60196	-0.00156254			6.6016	-0.000657404			6.60159	-0.000766478
6.60869	-0.00156808			6.60833	-0.000667779			6.60832	-0.000770279
6.61542	-0.00157154			6.61506	-0.000677665			6.61506	-0.000773812
6.62216	-0.00157366			6.6218	-0.000687494			6.62179	-0.00077746
6.62889	-0.00157377			6.62853	-0.000696219			6.62852	-0.000781805
6.63563	-0.00157248			6.63527	-0.00070285			6.63526	-0.000787434
6.64236	-0.00157188			6.642	-0.000707849			6.64199	-0.000793481
6.64909	-0.00157273			6.64873	-0.000712199			6.64873	-0.000797605
6.65583	-0.00157687			6.65547	-0.000716655			6.65546	-0.000799726
6.66256	-0.00158454			6.6622	-0.000721848			6.66219	-0.000799952
6.66929	-0.00159467			6.66893	-0.000727022			6.66893	-0.000798862
6.67603	-0.00160663			6.67567	-0.000731151			6.67566	-0.000798134
6.68276	-0.00161695			6.6824	-0.000734802			6.6824	-0.000798301
6.6895	-0.00162479			6.68914	-0.00073854			6.68913	-0.000799579
6.69623	-0.00163199			6.69587	-0.000742921			6.69586	-0.000801746
6.70296	-0.00163903			6.7026	-0.000748759			6.7026	-0.000804993
6.7097	-0.00164587			6.70934	-0.000756067			6.70933	-0.000809026
6.71643	-0.0016503			6.71607	-0.000763057			6.71606	-0.000812847
6.72317	-0.00165085			6.72281	-0.000768946			6.7228	-0.00081551
6.7299	-0.00164813			6.72954	-0.000774048			6.72953	-0.000817345
6.73663	-0.00164345			6.73627	-0.000778099			6.73627	-0.000819441
6.74337	-0.00163942			6.74301	-0.000780694			6.743	-0.000822396
6.7501	-0.00163743			6.74974	-0.000782509			6.74973	-0.000826368
6.75683	-0.0016423			6.75647	-0.000784443			6.75647	-0.000831774
6.76357	-0.00165528			6.76321	-0.000786562			6.7632	-0.000838887
6.7703	-0.00167018			6.76994	-0.000788855			6.76994	-0.00084626
6.77704	-0.00168429			6.77668	-0.000791339			6.77667	-0.000851812
6.78377	-0.00169776			6.78341	-0.000793422			6.7834	-0.000853291
6.7905	-0.00170977			6.79014	-0.000795579			6.79014	-0.00085117
6.79724	-0.00171915			6.79688	-0.000799037			6.79687	-0.00084881
6.80397	-0.00172669			6.80361	-0.000802785			6.8036	-0.000848237
6.8107	-0.00173252			6.81034	-0.000805659			6.81034	-0.000850174
6.81744	-0.00173667			6.81708	-0.000807854			6.81707	-0.000855456
6.82417	-0.00174085			6.82381	-0.000809654			6.82381	-0.000862116
6.83091	-0.00174606			6.83055	-0.000810156			6.83054	-0.000867933
6.83764	-0.0017524			6.83728	-0.000809254			6.83727	-0.000873163
6.84437	-0.00175887			6.84401	-0.000807981			6.84401	-0.000877954
6.85111	-0.00176494			6.85075	-0.000806534			6.85074	-0.000882395
6.85784	-0.00177145			6.85748	-0.00080524			6.85747	-0.000886491
6.86458	-0.00177963			6.86422	-0.000804916			6.86421	-0.000889952
6.87131	-0.0017877			6.87095	-0.000806184			6.87094	-0.00089286
6.87804	-0.00179143			6.87768	-0.000809461			6.87768	-0.0008958
6.88478	-0.00179134			6.88442	-0.000814264			6.88441	-0.000900297
6.89151	-0.00179005			6.89115	-0.000819109			6.89114	-0.000906811
6.89824	-0.00178889			6.89788	-0.000823294			6.89788	-0.000913378
6.90498	-0.00178844			6.90462	-0.000826861			6.90461	-0.000918835
6.91171	-0.00178945			6.91135	-0.000830303			6.91135	-0.000923242
6.91845	-0.00179554			6.91809	-0.000833908			6.91808	-0.000927351
6.92518	-0.00180406			6.92482	-0.000837927			6.92481	-0.000931653
6.93191	-0.00180163			6.93155	-0.000842347			6.93155	-0.00093592
6.93865	-0.00179127			6.93829	-0.000846893			6.93828	-0.000938437
6.94538	-0.00178581			6.94502	-0.000851722			6.94501	-0.000938811
6.95212	-0.00178777			6.95176	-0.000855285			6.95175	-0.000939131
6.95885	-0.00179318			6.95849	-0.000856734			6.95848	-0.00094022
6.96558	-0.00179317			6.96522	-0.000857387			6.96522	-0.000941162
6.97232	-0.00178572			6.97196	-0.000857716			6.97195	-0.000941268
6.97905	-0.00177697			6.97869	-0.0008582			6.97868	-0.000941627
6.98578	-0.00177253			6.98542	-0.000859759			6.98542	-0.000943208
6.99252	-0.00177373			6.99216	-0.000863094			6.99215	-0.000946656
6.99925	-0.00177874			6.99889	-0.000867283			6.99889	-0.000951037
7.00599	-0.00178193			7.00563	-0.000870492			7.00562	-0.000954015
7.01272	-0.00178261			7.01236	-0.0008728			7.01235	-0.000955328
7.01945	-0.00178315			7.01909	-0.000875581			7.01909	-0.000955059
7.02619	-0.00178303			7.02583	-0.000879887			7.02582	-0.000953661
7.03292	-0.00178118			7.03256	-0.000886424			7.03255	-0.000952691
7.03965	-0.00177841			7.03929	-0.000892445			7.03929	-0.000952752
7.04639	-0.00177613			7.04603	-0.000895753			7.04602	-0.000953605
7.05312	-0.00177484			7.05276	-0.000897772			7.05276	-0.000955003
7.05986	-0.00177495			7.0595	-0.000899449			7.05949	-0.000957346
7.06659	-0.00177728			7.06623	-0.000900771			7.06622	-0.000960536
7.07332	-0.00178421			7.07296	-0.000901287			7.07296	-0.000963851
7.08006	-0.00179216			7.0797	-0.000901094			7.07969	-0.000967088
7.08679	-0.00179224			7.08643	-0.000900797			7.08642	-0.000969525
7.09353	-0.00178078			7.09317	-0.000899781			7.09316	-0.000969494
7.10026	-0.00176456			7.0999	-0.000897146			7.09989	-0.000967841
7.10699	-0.00175192			7.10663	-0.000890299			7.10663	-0.000966932
7.11373	-0.00174416			7.11337	-0.000879228			7.11336	-0.000968704
7.12046	-0.00173998			7.1201	-0.000867959			7.12009	-0.000972604
7.12719	-0.00173709			7.12683	-0.0008583			7.12683	-0.000974878
7.13393	-0.00173509			7.13357	-0.000850891			7.13356	-0.000975555
7.14066	-0.00173168			7.1403	-0.000847803			7.1403	-0.000976341
7.1474	-0.00172684			7.14704	-0.000847855			7.14703	-0.000977581
7.15413	-0.00172313			7.15377	-0.000845065			7.15376	-0.000978933
7.16086	-0.0017204			7.1605	-0.000839179			7.1605	-0.000979975
7.1676	-0.0017172			7.16724	-0.000833088			7.16723	-0.000980616
7.17433	-0.00171224			7.17397	-0.000827652			7.17396	-0.000977753
7.18107	-0.00170448			7.18071	-0.000823444			7.1807	-0.000972497
7.1878	-0.00168881			7.18744	-0.000820298			7.18743	-0.000969848
7.19453	-0.00166478			7.19417	-0.000814924			7.19417	-0.000970944
7.20127	-0.00163983			7.20091	-0.000806611			7.2009	-0.000975034
7.208	-0.00161747			7.20764	-0.000798764			7.20763	-0.000979335
7.21473	-0.00159762			7.21437	-0.000791745			7.21437	-0.000980504
7.22147	-0.00158033			7.22111	-0.000783462			7.2211	-0.000974862
7.2282	-0.00156592			7.22784	-0.000768669			7.22784	-0.000965593
7.23494	-0.00155503			7.23458	-0.000749574			7.23457	-0.00095826
7.24167	-0.00154669			7.24131	-0.000732852			7.2413	-0.000953757
7.2484	-0.00153712			7.24804	-0.000719015			7.24804	-0.000950694
7.25514	-0.00152414			7.25478	-0.000706439			7.25477	-0.000946036
7.26187	-0.00150798			7.26151	-0.000694201			7.2615	-0.000940291
7.2686	-0.0014905			7.26824	-0.000682347			7.26824	-0.000935469
7.27534	-0.00147349			7.27498	-0.000668851			7.27497	-0.000932635
7.28207	-0.00145588			7.28171	-0.000651571			7.28171	-0.000930951
7.28881	-0.00143629			7.28845	-0.000631093			7.28844	-0.00092781
7.29554	-0.00141291			7.29518	-0.000609294			7.29517	-0.000920829
7.30227	-0.0013873			7.30191	-0.000585576			7.30191	-0.000909669
7.30901	-0.00136341			7.30865	-0.000562143			7.30864	-0.000893551
7.31574	-0.00134114			7.31538	-0.000542302			7.31537	-0.000873139
7.32248	-0.00131764			7.32212	-0.000524332			7.32211	-0.000854215
7.32921	-0.00129231			7.32885	-0.000505009			7.32884	-0.000839421
7.33594	-0.00126844			7.33558	-0.000484527			7.33558	-0.000830101
7.34268	-0.00124729			7.34232	-0.000463345			7.34231	-0.000824057
7.34941	-0.00122854			7.34905	-0.000439251			7.34904	-0.000816933
7.35614	-0.00120859			7.35578	-0.000411767			7.35578	-0.000809011
7.36288	-0.0011855			7.36252	-0.000383939			7.36251	-0.000801659
7.36961	-0.00116082			7.36925	-0.000359093			7.36925	-0.000795278
7.37635	-0.00112982			7.37599	-0.000337471			7.37598	-0.000789309
7.38308	-0.00109274			7.38272	-0.000318184			7.38271	-0.000783104
7.38981	-0.00105665			7.38945	-0.000299236			7.38945	-0.000775643
7.39655	-0.00102288			7.39619	-0.000279376			7.39618	-0.000763569
7.40328	-0.000988823			7.40292	-0.000258639			7.40291	-0.000748193
7.41002	-0.000954432			7.40966	-0.000236879			7.40965	-0.00073424
7.41675	-0.000923922			7.41639	-0.000214153			7.41638	-0.000722942
7.42348	-0.000898875			7.42312	-0.000191408			7.42312	-0.00071492
7.43022	-0.000880558			7.42986	-0.000169795			7.42985	-0.000709155
7.43695	-0.000872532			7.43659	-0.000150122			7.43658	-0.000702368
7.44368	-0.000870549			7.44332	-0.000133788			7.44332	-0.000694056
7.45042	-0.00086316			7.45006	-0.000121348			7.45005	-0.000686418
7.45715	-0.000849395			7.45679	-0.000109794			7.45679	-0.000676813
7.46389	-0.000833882			7.46353	-9.54761e-05			7.46352	-0.000661962
7.47062	-0.00081874			7.47026	-7.98471e-05			7.47025	-0.000644816
7.47735	-0.000805452			7.47699	-6.60158e-05			7.47699	-0.000629722
7.48409	-0.000791876			7.48373	-5.44395e-05			7.48372	-0.000617277
7.49082	-0.000772659			7.49046	-4.32099e-05			7.49045	-0.000607683
7.49755	-0.000750637			7.49719	-3.10186e-05			7.49719	-0.00060235
7.50429	-0.000733562			7.50393	-1.87251e-05			7.50392	-0.000600993
7.51102	-0.000727498			7.51066	-7.13546e-06			7.51066	-0.000598748
7.51776	-0.00073394			7.5174	3.03015e-06			7.51739	-0.000593909
7.52449	-0.000741024			7.52413	1.16072e-05			7.52412	-0.000588832
7.53122	-0.000742618			7.53086	1.84407e-05			7.53086	-0.00058317
7.53796	-0.000743026			7.5376	2.31393e-05			7.53759	-0.000576331
7.54469	-0.000744707			7.54433	3.34437e-05			7.54432	-0.00056933
7.55143	-0.000747743			7.55107	5.27122e-05			7.55106	-0.000562616
7.55816	-0.000746771			7.5578	7.31611e-05			7.55779	-0.000554097
7.56489	-0.000738466			7.56453	9.02134e-05			7.56453	-0.000544071
7.57163	-0.000727699			7.57127	0.000101461			7.57126	-0.000534688
7.57836	-0.000717167			7.578	0.000108923			7.57799	-0.000522584
7.58509	-0.000708194			7.58473	0.000114167			7.58473	-0.000507859
7.59183	-0.000702033			7.59147	0.000117818			7.59146	-0.000494833
7.59856	-0.000699998			7.5982	0.000121438			7.5982	-0.000484221
7.6053	-0.000695365			7.60494	0.000121713			7.60493	-0.000476249
7.61203	-0.000679276			7.61167	0.000114771			7.61166	-0.000468
7.61876	-0.000649701			7.6184	0.000104181			7.6184	-0.000456838
7.6255	-0.000612383			7.62514	9.55778e-05			7.62513	-0.000444183
7.63223	-0.000576584			7.63187	9.03767e-05			7.63186	-0.000431693
7.63897	-0.000543392			7.63861	8.50708e-05			7.6386	-0.000420715
7.6457	-0.000516403			7.64534	7.67517e-05			7.64533	-0.00041175
7.65243	-0.000499078			7.65207	6.68831e-05			7.65207	-0.000401589
7.65917	-0.00049083			7.65881	5.85918e-05			7.6588	-0.000389242
7.6659	-0.000490701			7.66554	5.28723e-05			7.66553	-0.000376964
7.67263	-0.000497089			7.67227	4.825e-05			7.67227	-0.000363167
7.67937	-0.000507024			7.67901	4.38577e-05			7.679	-0.000347661
7.6861	-0.000518383			7.68574	3.98295e-05			7.68574	-0.000332105
7.69284	-0.000532078			7.69248	3.6337e-05			7.69247	-0.000315984
7.69957	-0.000548834			7.69921	3.29548e-05			7.6992	-0.000298751
7.7063	-0.000564209			7.70594	2.91793e-05			7.70594	-0.000282204
7.71304	-0.000574999			7.71268	2.444e-05			7.71267	-0.000268221
7.71977	-0.000582416			7.71941	2.09209e-05			7.7194	-0.000257035
7.7265	-0.000583116			7.72614	2.00062e-05			7.72614	-0.000246442
7.73324	-0.00057673			7.73288	1.91566e-05			7.73287	-0.000232969
7.73997	-0.000569718			7.73961	1.71833e-05			7.73961	-0.000215621
7.74671	-0.000565194			7.74635	1.10073e-05			7.74634	-0.000193135
7.75344	-0.000561044			7.75308	1.99235e-06			7.75307	-0.000167512
7.76017	-0.00055667			7.75981	-5.0273e-06			7.75981	-0.000142765
7.76691	-0.00055411			7.76655	-9.53679e-06			7.76654	-0.000119536
7.77364	-0.000555045			7.77328	-1.20444e-05			7.77327	-9.67099e-05
7.78038	-0.000559515			7.78002	-1.48582e-05			7.78001	-7.43797e-05
7.78711	-0.000564366			7.78675	-1.93136e-05			7.78674	-5.4309e-05
7.79384	-0.000568219			7.79348	-2.51794e-05			7.79348	-3.51663e-05
7.80058	-0.000571471			7.80022	-3.17707e-05			7.80021	-1.00975e-05
7.80731	-0.000574644			7.80695	-3.86025e-05			7.80694	2.48704e-05
7.81404	-0.000579472			7.81368	-4.56637e-05			7.81368	6.35818e-05
7.82078	-0.000586968			7.82042	-5.15602e-05			7.82041	0.000100014
7.82751	-0.000592214			7.82715	-5.53017e-05			7.82715	0.000132498
7.83425	-0.000589747			7.83389	-5.65106e-05			7.83388	0.000161566
7.84098	-0.000583853			7.84062	-5.55055e-05			7.84061	0.000191079
7.84771	-0.000580314			7.84735	-5.42951e-05			7.84735	0.000223189
7.85445	-0.000580585			7.85409	-5.33633e-05			7.85408	0.00025785
7.86118	-0.000588404			7.86082	-5.2137e-05			7.86081	0.000295935
7.86792	-0.000598337			7.86756	-5.04824e-05			7.86755	0.000338319
7.87465	-0.000597913			7.87429	-4.88732e-05			7.87428	0.000383431
7.88138	-0.000584449			7.88102	-4.65514e-05			7.88102	0.000427214
7.88812	-0.000565803			7.88776	-4.31858e-05			7.88775	0.000471503
7.89485	-0.000550012			7.89449	-3.90673e-05			7.89448	0.000519492
7.90158	-0.000538216			7.90122	-3.05129e-05			7.90122	0.000572276
7.90832	-0.000531791			7.90796	-1.4574e-05			7.90795	0.000626389
7.91505	-0.000529662			7.91469	5.55648e-06			7.91469	0.00068188
7.92179	-0.000523584			7.92143	2.71867e-05			7.92142	0.00074206
7.92852	-0.000509893			7.92816	5.15618e-05			7.92815	0.000802642
7.93525	-0.000492454			7.93489	8.04481e-05			7.93489	0.000862955
7.94199	-0.000472992			7.94163	0.000112454			7.94162	0.000928239
7.94872	-0.000451884			7.94836	0.000147463			7.94835	0.000995293
7.95545	-0.000430679			7.95509	0.000190854			7.95509	0.00105967
7.96219	-0.000412798			7.96183	0.000248126			7.96182	0.00112499
7.96892	-0.000398921			7.96856	0.000313647			7.96856	0.00119274
7.97566	-0.000387037			7.9753	0.000384056			7.97529	0.00126131
7.98239	-0.000373096			7.98203	0.000467211			7.98202	0.00132945
7.98912	-0.000354246			7.98876	0.000558956			7.98876	0.00139691
7.99586	-0.000328517			7.9955	0.000650577			7.99549	0.00146316
8.00259	-0.000291971			8.00223	0.000746135			8.00222	0.00152876
8.00933	-0.000247688			8.00897	0.000848659			8.00896	0.00159724
8.01606	-0.000209532			8.0157	0.000957954			8.01569	0.00167127
8.02279	-0.00018575			8.02243	0.00107884			8.02243	0.00174664
8.02953	-0.000172657			8.02917	0.00120944			8.02916	0.00182227
8.03626	-0.000149812			8.0359	0.00134788			8.03589	0.00190564
8.04299	-0.000107991			8.04263	0.00149549			8.04263	0.00199251
8.04973	-5.89019e-05			8.04937	0.00165141			8.04936	0.0020749
8.05646	-1.18698e-05			8.0561	0.00182061			8.0561	0.00215686
8.0632	2.47463e-05			8.06284	0.00200459			8.06283	0.00224211
8.06993	4.69146e-05			8.06957	0.00219218			8.06956	0.00232819
8.07666	6.07981e-05			8.0763	0.00238218			8.0763	0.00241228
8.0834	7.46626e-05			8.08304	0.0025852			8.08303	0.00249822
8.09013	8.55107e-05			8.08977	0.00280097			8.08976	0.00259045
8.09687	9.19299e-05			8.09651	0.00301756			8.0965	0.0026848
8.1036	9.34936e-05			8.10324	0.00323199			8.10323	0.00277839
8.11033	9.99732e-05			8.10997	0.00345504			8.10997	0.0028706
8.11707	0.000124182			8.11671	0.0036881			8.1167	0.00295839
8.1238	0.000158847			8.12344	0.00392755			8.12343	0.00304303
8.13053	0.000190818			8.13017	0.0041699			8.13017	0.00312951
8.13727	0.000219227			8.13691	0.00441886			8.1369	0.00321531
8.144	0.000252764			8.14364	0.00467918			8.14364	0.0032948
8.15074	0.000292425			8.15038	0.00495017			8.15037	0.00336976
8.15747	0.000330921			8.15711	0.00522924			8.1571	0.00344153
8.1642	0.000385887			8.16384	0.005509			8.16384	0.00351405
8.17094	0.000455385			8.17058	0.00578981			8.17057	0.00359042
8.17767	0.000514788			8.17731	0.00607436			8.1773	0.00366786
8.1844	0.000552847			8.18404	0.00636522			8.18404	0.00374329
8.19114	0.000576784			8.19078	0.00666267			8.19077	0.00381482
8.19787	0.000602797			8.19751	0.00696473			8.19751	0.0038822
8.20461	0.000628814			8.20425	0.0072724			8.20424	0.0039444
8.21134	0.000655589			8.21098	0.0075858			8.21097	0.00400217
8.21807	0.000682104			8.21771	0.00790672			8.21771	0.00405541
8.22481	0.000706144			8.22445	0.00823912			8.22444	0.00410363
8.23154	0.000729652			8.23118	0.00857976			8.23117	0.00414712
8.23828	0.00074822			8.23792	0.00892553			8.23791	0.0041861
8.24501	0.000754962			8.24465	0.0092727			8.24464	0.00422142
8.25174	0.000753133			8.25138	0.00961919			8.25138	0.00425282
8.25848	0.000752044			8.25812	0.00997358			8.25811	0.00427946
8.26521	0.00075722			8.26485	0.0103406			8.26484	0.00430112
8.27194	0.000765693			8.27158	0.0107215			8.27158	0.00431724
8.27868	0.000772839			8.27832	0.0111035			8.27831	0.0043277
8.28541	0.000776045			8.28505	0.0114675			8.28505	0.00433161
8.29215	0.000777076			8.29179	0.0118196			8.29178	0.0043306
8.29888	0.000780813			8.29852	0.0121756			8.29851	0.00432791
8.30561	0.000788058			8.30525	0.0125355			8.30525	0.00432216
8.31235	0.000795862			8.31199	0.0128964			8.31198	0.00431175
8.31908	0.000805581			8.31872	0.0132585			8.31871	0.00429613
8.32582	0.000821062			8.32546	0.0136178			8.32545	0.00427478
8.33255	0.000843205			8.33219	0.0139753			8.33218	0.00424847
8.33928	0.00086664			8.33892	0.0143361			8.33892	0.00421828
8.34602	0.000883667			8.34566	0.014704			8.34565	0.00418583
8.35275	0.000890839			8.35239	0.0150793			8.35238	0.00415313
8.35948	0.000892601			8.35912	0.0154534			8.35912	0.00411793
8.36622	0.000901682			8.36586	0.0158123			8.36585	0.00407631
8.37295	0.000919704			8.37259	0.0161513			8.37259	0.00402355
8.37969	0.000936279			8.37933	0.0164776			8.37932	0.00396316
8.38642	0.000948896			8.38606	0.0167981			8.38605	0.00390507
8.39315	0.00095562			8.39279	0.017119			8.39279	0.00384963
8.39989	0.000956344			8.39953	0.0174391			8.39952	0.00379208
8.40662	0.000954869			8.40626	0.0177564			8.40625	0.00372764
8.41335	0.000957334			8.41299	0.018075			8.41299	0.00365925
8.42009	0.000964098			8.41973	0.0183913			8.41972	0.00358999
8.42682	0.000969121			8.42646	0.0186935			8.42646	0.00351627
8.43356	0.000970824			8.4332	0.0189814			8.43319	0.00343658
8.44029	0.000968452			8.43993	0.0192659			8.43992	0.00335484
8.44702	0.000962555			8.44666	0.0195495			8.44666	0.00327497
8.45376	0.000955674			8.4534	0.0198329			8.45339	0.00319683
8.46049	0.000948952			8.46013	0.0201131			8.46012	0.0031189
8.46723	0.000942607			8.46687	0.0203873			8.46686	0.00304259
8.47396	0.000940063			8.4736	0.0206535			8.47359	0.00296891
8.48069	0.000945933			8.48033	0.0209108			8.48033	0.00289142
8.48743	0.000957372			8.48707	0.0211676			8.48706	0.00280885
8.49416	0.00097041			8.4938	0.0214373			8.49379	0.00272917
8.50089	0.000985608			8.50053	0.021716			8.50053	0.00265426
8.50763	0.00100324			8.50727	0.0219812			8.50726	0.00257532
8.51436	0.00102204			8.514	0.0222266			8.514	0.00249133
8.5211	0.00103843			8.52074	0.022465			8.52073	0.00241134
8.52783	0.00105031			8.52747	0.0227022			8.52746	0.00233406
8.53456	0.0010578			8.5342	0.0229408			8.5342	0.00225775
8.5413	0.00106117			8.54094	0.0231821			8.54093	0.00218101
8.54803	0.00106059			8.54767	0.0234188			8.54766	0.00210517
8.55476	0.00106216			8.55441	0.0236494			8.5544	0.00203258
8.5615	0.00107107			8.56114	0.0238788			8.56113	0.00195664
8.56823	0.00108514			8.56787	0.0241106			8.56787	0.00187805
8.57497	0.0011018			8.57461	0.024345			8.5746	0.00180456
8.5817	0.00112234			8.58134	0.0245769			8.58133	0.00173683
8.58843	0.00115078			8.58807	0.0248124			8.58807	0.00167306
8.59517	0.00118557			8.59481	0.0250603			8.5948	0.00160863
8.6019	0.00122231			8.60154	0.0253095			8.60154	0.00154218
8.60864	0.00125673			8.60828	0.025549			8.60827	0.00147644
8.61537	0.0012866			8.61501	0.0257824			8.615	0.00141255
8.6221	0.00131194			8.62174	0.0260146			8.62174	0.00134856
8.62884	0.00133495			8.62848	0.0262503			8.62847	0.00128278
8.63557	0.00136136			8.63521	0.0264992			8.6352	0.00121859
8.6423	0.00139297			8.64194	0.0267601			8.64194	0.00115831
8.64904	0.0014257			8.64868	0.0270176			8.64867	0.0011003
8.65577	0.00145778			8.65541	0.027267			8.65541	0.00104336
8.66251	0.00149104			8.66215	0.0275144			8.66214	0.000987821
8.66924	0.0015243			8.66888	0.0277645			8.66887	0.000931747
8.67597	0.00155418			8.67561	0.0280151			8.67561	0.000875958
8.68271	0.00158207			8.68235	0.0282636			8.68234	0.000823462
8.68944	0.00160885			8.68908	0.0285159			8.68907	0.000773121
8.69618	0.00163297			8.69582	0.0287766			8.69581	0.000724799
8.70291	0.00165392			8.70255	0.029038			8.70254	0.00068212
8.70964	0.00167505			8.70928	0.0292986			8.70928	0.000645727
8.71638	0.0016986			8.71602	0.0295638			8.71601	0.000611339
8.72311	0.00172812			8.72275	0.0298377			8.72274	0.000576523
8.72984	0.00176294			8.72948	0.0301217			8.72948	0.000542047
8.73658	0.00179577			8.73622	0.0304036			8.73621	0.000506499
8.74331	0.00182613			8.74295	0.0306798			8.74295	0.000468505
8.75005	0.00186152			8.74969	0.0309575			8.74968	0.0004299
8.75678	0.0019032			8.75642	0.0312422			8.75641	0.000392413
8.76351	0.00194374			8.76315	0.0315412			8.76315	0.000357468
8.77025	0.00198103			8.76989	0.0318465			8.76988	0.000327084
8.77698	0.0020137			8.77662	0.0321483			8.77661	0.000301955
8.78371	0.00204195			8.78336	0.0324445			8.78335	0.000275915
8.79045	0.0020706			8.79009	0.0327354			8.79008	0.000243905
8.79718	0.00211284			8.79682	0.033031			8.79682	0.000209363
8.80392	0.00217272			8.80356	0.0333348			8.80355	0.000175806
8.81065	0.00223626			8.81029	0.033638			8.81028	0.00014299
8.81738	0.00229358			8.81702	0.0339385			8.81702	0.000110286
8.82412	0.00234681			8.82376	0.0342407			8.82375	7.87849e-05
8.83085	0.00240126			8.83049	0.034547			8.83049	5.02424e-05
8.83759	0.0024594			8.83723	0.0348594			8.83722	2.42593e-05
8.84432	0.00251723			8.84396	0.0351806			8.84395	-1.09714e-06
8.85105	0.00257895			8.85069	0.0355101			8.85069	-2.68952e-05
8.85779	0.0026435			8.85743	0.0358484			8.85742	-5.38782e-05
8.86452	0.00269925			8.86416	0.036193			8.86415	-8.23685e-05
8.87125	0.00274508			8.87089	0.0365316			8.87089	-0.000110434
8.87799	0.00278511			8.87763	0.0368642			8.87762	-0.000136448
8.88472	0.00283296			8.88436	0.0371972			8.88436	-0.000160406
8.89146	0.00288831			8.8911	0.037532			8.89109	-0.0001835
8.89819	0.00293984			8.89783	0.0378666			8.89782	-0.000205864
8.90492	0.00299182			8.90456	0.0381974			8.90456	-0.000227576
8.91166	0.00305548			8.9113	0.0385269			8.91129	-0.000249506
8.91839	0.00312799			8.91803	0.0388701			8.91802	-0.000271203
8.92513	0.00319702			8.92477	0.039228			8.92476	-0.000291275
8.93186	0.00326888			8.9315	0.0395763			8.93149	-0.000310472
8.93859	0.00335188			8.93823	0.0399104			8.93823	-0.000329664
8.94533	0.00343674			8.94497	0.0402495			8.94496	-0.000349004
8.95206	0.00351554			8.9517	0.0405978			8.95169	-0.000369713
8.95879	0.00358765			8.95843	0.0409532			8.95843	-0.000390607
8.96553	0.00365204			8.96517	0.0413132			8.96516	-0.000408459
8.97226	0.00371174			8.9719	0.0416774			8.9719	-0.000423603
8.979	0.00377601			8.97864	0.0420457			8.97863	-0.000437988
8.98573	0.00385552			8.98537	0.0424156			8.98536	-0.000452528
8.99246	0.00394331			8.9921	0.0427889			8.9921	-0.00046672
8.9992	0.00402802			8.99884	0.0431667			8.99883	-0.000480963
9.00593	0.00410979			9.00557	0.0435415			9.00556	-0.00049628
9.01266	0.00419241			9.01231	0.0439179			9.0123	-0.000511815
9.0194	0.00427515			9.01904	0.0443034			9.01903	-0.000527063
9.02613	0.00435146			9.02577	0.0446873			9.02577	-0.000542463
9.03287	0.00442036			9.03251	0.0450748			9.0325	-0.000557786
9.0396	0.00448353			9.03924	0.0454751			9.03923	-0.000572532
9.04633	0.00455389			9.04597	0.0458777			9.04597	-0.00058651
9.05307	0.00464463			9.05271	0.046275			9.0527	-0.000600281
9.0598	0.00474569			9.05944	0.0466669			9.05944	-0.000614261
9.06654	0.00484782			9.06618	0.0470612			9.06617	-0.000628331
9.07327	0.00494976			9.07291	0.0474544			9.0729	-0.000641237
9.08	0.00504703			9.07964	0.0478493			9.07964	-0.000652115
9.08674	0.00514094			9.08638	0.0482491			9.08637	-0.000662871
9.09347	0.00523301			9.09311	0.0486488			9.0931	-0.000674985
9.1002	0.00532012			9.09984	0.0490485			9.09984	-0.000688104
9.10694	0.00540349			9.10658	0.0494502			9.10657	-0.000701161
9.11367	0.00549127			9.11331	0.0498555			9.11331	-0.000713474
9.12041	0.00558381			9.12005	0.0502705			9.12004	-0.000725468
9.12714	0.00567443			9.12678	0.050698			9.12677	-0.00073689
9.13387	0.0057667			9.13351	0.0511253			9.13351	-0.000746061
9.14061	0.00586739			9.14025	0.0515466			9.14024	-0.000754004
9.14734	0.00597225			9.14698	0.0519696			9.14697	-0.000763196
9.15408	0.00607683			9.15372	0.0523925			9.15371	-0.00077538
9.16081	0.00617636			9.16045	0.0528138			9.16044	-0.000791997
9.16754	0.00627017			9.16718	0.053239			9.16718	-0.000809972
9.17428	0.00636475			9.17392	0.0536675			9.17391	-0.000824957
9.18101	0.00646252			9.18065	0.0540979			9.18064	-0.000836999
9.18774	0.0065642			9.18738	0.0545332			9.18738	-0.000848072
9.19448	0.00667018			9.19412	0.0549736			9.19411	-0.000858899
9.20121	0.00678104			9.20085	0.0554232			9.20085	-0.000869919
9.20795	0.00689507			9.20759	0.0558783			9.20758	-0.000880621
9.21468	0.0070112			9.21432	0.0563375			9.21431	-0.000890317
9.22141	0.00713308			9.22105	0.0567972			9.22105	-0.000899211
9.22815	0.0072605			9.22779	0.0572479			9.22778	-0.000905446
9.23488	0.00739783			9.23452	0.0576967			9.23451	-0.000909343
9.24161	0.00754023			9.24126	0.0581533			9.24125	-0.000913596
9.24835	0.00767485			9.24799	0.0586211			9.24798	-0.000918705
9.25508	0.00780021			9.25472	0.0590903			9.25472	-0.000924105
9.26182	0.00792302			9.26146	0.0595629			9.26145	-0.000929096
9.26855	0.00805214			9.26819	0.0600478			9.26818	-0.000935006
9.27528	0.00818363			9.27492	0.0605269			9.27492	-0.000942995
9.28202	0.00831961			9.28166	0.0609929			9.28165	-0.000951837
9.28875	0.00846114			9.28839	0.0614628			9.28839	-0.000960074
9.29549	0.00859945			9.29513	0.0619405			9.29512	-0.000967955
9.30222	0.00873142			9.30186	0.0624271			9.30185	-0.000976086
9.30895	0.00886157			9.30859	0.0629185			9.30859	-0.000984851
9.31569	0.00899705			9.31533	0.0634075			9.31532	-0.000993744
9.32242	0.00914374			9.32206	0.0638956			9.32205	-0.00100189
9.32915	0.00930055			9.32879	0.0643852			9.32879	-0.00100977
9.33589	0.00945733			9.33553	0.0648784			9.33552	-0.00101802
9.34262	0.0096174			9.34226	0.065375			9.34226	-0.00102799
9.34936	0.00977838			9.349	0.0658761			9.34899	-0.0010405
9.35609	0.00992825			9.35573	0.0663829			9.35572	-0.00105287
9.36282	0.0100691			9.36246	0.0668919			9.36246	-0.00106257
9.36956	0.0102179			9.3692	0.0674101			9.36919	-0.00107068
9.37629	0.0103825			9.37593	0.0679371			9.37592	-0.00107877
9.38303	0.0105476			9.38267	0.0684596			9.38266	-0.00108732
9.38976	0.0107081			9.3894	0.0689744			9.38939	-0.00109634
9.39649	0.0108727			9.39613	0.0694907			9.39613	-0.0011063
9.40323	0.011037			9.40287	0.0700248			9.40286	-0.00111455
9.40996	0.0111951			9.4096	0.0705605			9.40959	-0.00111947
9.41669	0.0113547			9.41633	0.0710823			9.41633	-0.00112406
9.42343	0.0115241			9.42307	0.0716038			9.42306	-0.00112895
9.43016	0.011702			9.4298	0.0721312			9.4298	-0.00113411
9.4369	0.0118823			9.43654	0.0726645			9.43653	-0.00113956
9.44363	0.0120621			9.44327	0.0732133			9.44326	-0.00114526
9.45036	0.0122613			9.45	0.0737845			9.45	-0.00115015
9.4571	0.0124839			9.45674	0.0743646			9.45673	-0.00115398
9.46383	0.0127115			9.46347	0.074933			9.46346	-0.00115768
9.47056	0.0129353			9.47021	0.0754886			9.4702	-0.00116139
9.4773	0.0131443			9.47694	0.076049			9.47693	-0.00116516
9.48403	0.013334			9.48367	0.0766313			9.48367	-0.00116957
9.49077	0.0135063			9.49041	0.0772412			9.4904	-0.00117567
9.4975	0.0136689			9.49714	0.0778533			9.49713	-0.00118338
9.50423	0.0138359			9.50387	0.0784361			9.50387	-0.00119189
9.51097	0.0140176			9.51061	0.0790107			9.5106	-0.00120103
9.5177	0.0142113			9.51734	0.0795984			9.51733	-0.00121147
9.52444	0.0144065			9.52408	0.0801815			9.52407	-0.00122149
9.53117	0.0145998			9.53081	0.0807563			9.5308	-0.00122868
9.5379	0.0147904			9.53754	0.0813329			9.53754	-0.0012341
9.54464	0.0149815			9.54428	0.0819151			9.54427	-0.00123897
9.55137	0.0151815			9.55101	0.0825063			9.551	-0.00124375
9.5581	0.0153913			9.55774	0.0831071			9.55774	-0.00124886
9.56484	0.0155972			9.56448	0.0837182			9.56447	-0.00125558
9.57157	0.0157931			9.57121	0.0843323			9.57121	-0.00126271
9.57831	0.0159922			9.57795	0.0849421			9.57794	-0.00126884
9.58504	0.0162071			9.58468	0.0855536			9.58467	-0.00127524
9.59177	0.0164363			9.59141	0.0861652			9.59141	-0.00128268
9.59851	0.0166629			9.59815	0.0867752			9.59814	-0.00129071
9.60524	0.0168834			9.60488	0.0873892			9.60487	-0.00129849
9.61198	0.0171081			9.61162	0.0880111			9.61161	-0.00130647
9.61871	0.017346			9.61835	0.0886433			9.61834	-0.00131488
9.62544	0.0175877			9.62508	0.0892883			9.62508	-0.001322
9.63218	0.0178225			9.63182	0.0899379			9.63181	-0.00132666
9.63891	0.0180617			9.63855	0.0905876			9.63854	-0.00133063
9.64564	0.0183146			9.64528	0.0912446			9.64528	-0.00133466
9.65238	0.0185644			9.65202	0.0919054			9.65201	-0.00133763
9.65911	0.0188029			9.65875	0.0925728			9.65875	-0.00133789
9.66585	0.0190357			9.66549	0.09325			9.66548	-0.00133651
9.67258	0.0192713			9.67222	0.0939274			9.67221	-0.00133611
9.67931	0.0195172			9.67895	0.0946024			9.67895	-0.00133773
9.68605	0.0197602			9.68569	0.0952843			9.68568	-0.00134208
9.69278	0.0200004			9.69242	0.0959702			9.69241	-0.0013492
9.69951	0.0202495			9.69916	0.0966547			9.69915	-0.0013578
9.70625	0.0205077			9.70589	0.0973438			9.70588	-0.0013662
9.71298	0.0207687			9.71262	0.098037			9.71262	-0.00137348
9.71972	0.0210328			9.71936	0.098736			9.71935	-0.0013802
9.72645	0.0212999			9.72609	0.0994442			9.72608	-0.0013866
9.73318	0.0215601			9.73282	0.100161			9.73282	-0.00139293
9.73992	0.021815			9.73956	0.100881			9.73955	-0.00140016
9.74665	0.0220691			9.74629	0.101614			9.74628	-0.00140838
9.75339	0.0223318			9.75303	0.102368			9.75302	-0.00141589
9.76012	0.0226019			9.75976	0.103119			9.75975	-0.00142217
9.76685	0.0228667			9.76649	0.103865			9.76649	-0.00142788
9.77359	0.0231279			9.77323	0.104621			9.77322	-0.00143337
9.78032	0.0233954			9.77996	0.105374			9.77995	-0.0014404
9.78705	0.0236729			9.78669	0.106125			9.78669	-0.00144786
9.79379	0.0239554			9.79343	0.106873			9.79342	-0.00145191
9.80052	0.0242389			9.80016	0.107612			9.80016	-0.00145297
9.80726	0.0245265			9.8069	0.108356			9.80689	-0.00145244
9.81399	0.0248208			9.81363	0.109106			9.81362	-0.001451
9.82072	0.0251154			9.82036	0.10986			9.82036	-0.00145054
9.82746	0.0254092			9.8271	0.110631			9.82709	-0.00145231
9.83419	0.0257112			9.83383	0.111405			9.83382	-0.00145539
9.84093	0.0260225			9.84057	0.11218			9.84056	-0.0014588
9.84766	0.0263303			9.8473	0.112968			9.84729	-0.00146313
9.85439	0.0266305			9.85403	0.113757			9.85403	-0.00146846
9.86113	0.0269252			9.86077	0.114554			9.86076	-0.00147411
9.86786	0.0272215			9.8675	0.115362			9.86749	-0.00148047
9.87459	0.0275264			9.87423	0.116172			9.87423	-0.00148635
9.88133	0.0278383			9.88097	0.116981			9.88096	-0.0014906
9.88806	0.0281507			9.8877	0.117794			9.8877	-0.0014943
9.8948	0.0284548			9.89444	0.118618			9.89443	-0.00149866
9.90153	0.0287612			9.90117	0.119463			9.90116	-0.00150456
9.90826	0.0290886			9.9079	0.120326			9.9079	-0.00151031
9.915	0.0294373			9.91464	0.121193			9.91463	-0.00151194
9.92173	0.0297828			9.92137	0.122044			9.92136	-0.00151119
9.92846	0.0301128			9.92811	0.122876			9.9281	-0.00151301
9.9352	0.0304422			9.93484	0.123708			9.93483	-0.00151862
9.94193	0.0307786			9.94157	0.124562			9.94157	-0.00152549
9.94867	0.0311273			9.94831	0.125429			9.9483	-0.00153057
9.9554	0.0314837			9.95504	0.126291			9.95503	-0.00153491
9.96213	0.0318285			9.96177	0.127154			9.96177	-0.001539
9.96887	0.0321562			9.96851	0.12802			9.9685	-0.00154313
9.9756	0.0324823			9.97524	0.128892			9.97523	-0.00154757
9.98234	0.032814			9.98198	0.129776			9.98197	-0.00155257
9.98907	0.0331487			9.98871	0.130661			9.9887	-0.00155811
9.9958	0.0334896			9.99544	0.131542			9.99544	-0.00156296
10.0025	0.0338426			10.0022	0.132424			10.0022	-0.00156652
10.0093	0.0342117			10.0089	0.13331			10.0089	-0.00157006
10.016	0.034586			10.0156	0.134205			10.0156	-0.00157438
10.0227	0.0349614			10.0224	0.135111			10.0224	-0.00157872
10.0295	0.0353431			10.0291	0.136025			10.0291	-0.00158208
10.0362	0.0357187			10.0358	0.136942			10.0358	-0.00158425
10.0429	0.0360924			10.0426	0.137866			10.0426	-0.00158586
10.0497	0.0364779			10.0493	0.138796			10.0493	-0.00158756
10.0564	0.0368669			10.056	0.139731			10.056	-0.00158971
10.0631	0.0372497			10.0628	0.140676			10.0628	-0.00159374
10.0699	0.0376337			10.0695	0.14164			10.0695	-0.00159942
10.0766	0.0380254			10.0762	0.142625			10.0762	-0.00160447
10.0833	0.0384119			10.083	0.1436			10.083	-0.0016085
10.0901	0.0387969			10.0897	0.144554			10.0897	-0.00161207
10.0968	0.0391959			10.0965	0.145509			10.0964	-0.00161535
10.1035	0.0396197			10.1032	0.146461			10.1032	-0.00161873
10.1103	0.0400639			10.1099	0.147413			10.1099	-0.0016226
10.117	0.0404951			10.1167	0.14837			10.1166	-0.0016278
10.1237	0.040908			10.1234	0.14933			10.1234	-0.00163411
10.1305	0.0413351			10.1301	0.150297			10.1301	-0.00164034
10.1372	0.041775			10.1369	0.151282			10.1368	-0.00164662
10.1439	0.04221			10.1436	0.15229			10.1436	-0.00165311
10.1507	0.0426396			10.1503	0.153293			10.1503	-0.00165964
10.1574	0.0430709			10.1571	0.15428			10.157	-0.00166489
10.1641	0.0435039			10.1638	0.155268			10.1638	-0.00166651
10.1709	0.0439414			10.1705	0.156282			10.1705	-0.00166486
10.1776	0.0443874			10.1773	0.157317			10.1772	-0.00166262
10.1844	0.0448393			10.184	0.158331			10.184	-0.00166113
10.1911	0.0453022			10.1907	0.159324			10.1907	-0.00166256
10.1978	0.0457743			10.1975	0.160319			10.1975	-0.00166683
10.2046	0.0462469			10.2042	0.161327			10.2042	-0.00167148
10.2113	0.0467247			10.2109	0.162341			10.2109	-0.00167641
10.218	0.0472105			10.2177	0.163351			10.2177	-0.00168201
10.2248	0.0477037			10.2244	0.164371			10.2244	-0.00168778
10.2315	0.0482303			10.2311	0.165399			10.2311	-0.00169303
10.2382	0.0487724			10.2379	0.166442			10.2379	-0.00169823
10.245	0.049293			10.2446	0.167506			10.2446	-0.001704
10.2517	0.0498149			10.2513	0.16856			10.2513	-0.00170941
10.2584	0.0503654			10.2581	0.169592			10.2581	-0.00171313
10.2652	0.0509145			10.2648	0.170631			10.2648	-0.0017161
10.2719	0.0514367			10.2715	0.171678			10.2715	-0.00171893
10.2786	0.051971			10.2783	0.172727			10.2783	-0.00172026
10.2854	0.0525353			10.285	0.173773			10.285	-0.00171979
10.2921	0.0531144			10.2917	0.174819			10.2917	-0.0017189
10.2988	0.0536764			10.2985	0.175865			10.2985	-0.00171846
10.3056	0.054226			10.3052	0.176912			10.3052	-0.00171923
10.3123	0.0547935			10.3119	0.177962			10.3119	-0.0017218
10.319	0.0553834			10.3187	0.179014			10.3187	-0.00172523
10.3258	0.0559911			10.3254	0.180067			10.3254	-0.00172717
10.3325	0.0565909			10.3321	0.181121			10.3321	-0.00172787
10.3392	0.0571827			10.3389	0.182194			10.3389	-0.00172897
10.346	0.0577988			10.3456	0.183297			10.3456	-0.00173099
10.3527	0.0584312			10.3523	0.1844			10.3523	-0.00173371
10.3594	0.0590608			10.3591	0.18548			10.3591	-0.00173694
10.3662	0.0596899			10.3658	0.186549			10.3658	-0.00174084
10.3729	0.0603247			10.3725	0.187621			10.3725	-0.00174534
10.3796	0.0609805			10.3793	0.188693			10.3793	-0.00174955
10.3864	0.0616467			10.386	0.189773			10.386	-0.00174981
10.3931	0.0623098			10.3927	0.190863			10.3927	-0.0017468
10.3998	0.0629787			10.3995	0.191957			10.3995	-0.00174532
10.4066	0.0636593			10.4062	0.19305			10.4062	-0.00174668
10.4133	0.0643447			10.4129	0.194141			10.4129	-0.00175102
10.42	0.0650323			10.4197	0.195239			10.4197	-0.00175657
10.4268	0.0657298			10.4264	0.196353			10.4264	-0.00176219
10.4335	0.0664387			10.4331	0.197478			10.4331	-0.00176732
10.4402	0.0671644			10.4399	0.198608			10.4399	-0.00177154
10.447	0.0679072			10.4466	0.199746			10.4466	-0.0017751
10.4537	0.068652			10.4533	0.200892			10.4533	-0.0017783
10.4604	0.0693919			10.4601	0.202048			10.4601	-0.00178128
10.4672	0.0701522			10.4668	0.203209			10.4668	-0.00178433
10.4739	0.0709276			10.4735	0.204374			10.4735	-0.00178775
10.4806	0.0717082			10.4803	0.205549			10.4803	-0.00179236
10.4874	0.0724934			10.487	0.206743			10.487	-0.00179841
10.4941	0.0732808			10.4937	0.207937			10.4937	-0.00180336
10.5008	0.0740745			10.5005	0.209114			10.5005	-0.00180576
10.5076	0.07487			10.5072	0.210298			10.5072	-0.00180686
10.5143	0.0756745			10.5139	0.211489			10.5139	-0.00180816
10.521	0.0764966			10.5207	0.212676			10.5207	-0.00181077
10.5278	0.0773344			10.5274	0.213878			10.5274	-0.00181499
10.5345	0.0781807			10.5341	0.215093			10.5341	-0.00181963
10.5412	0.079037			10.5409	0.216305			10.5409	-0.00182307
10.548	0.0798994			10.5476	0.217521			10.5476	-0.00182534
10.5547	0.0807605			10.5544	0.218756			10.5543	-0.00182581
10.5614	0.0816314			10.5611	0.220015			10.5611	-0.00182243
10.5682	0.0825142			10.5678	0.221278			10.5678	-0.00181417
10.5749	0.0833931			10.5746	0.222534			10.5745	-0.00180571
10.5816	0.0842729			10.5813	0.223792			10.5813	-0.00180187
10.5884	0.0851813			10.588	0.225064			10.588	-0.00180188
10.5951	0.0861054			10.5948	0.226356			10.5947	-0.00180373
10.6018	0.0870233			10.6015	0.227658			10.6015	-0.00180629
10.6086	0.0879461			10.6082	0.228962			10.6082	-0.00180991
10.6153	0.0888872			10.615	0.230289			10.6149	-0.00181439
10.622	0.0899012			10.6217	0.231632			10.6217	-0.00181676
10.6288	0.0909343			10.6284	0.232968			10.6284	-0.00181623
10.6355	0.0918809			10.6352	0.234309			10.6351	-0.0018156
10.6423	0.0927826			10.6419	0.235667			10.6419	-0.00181609
10.649	0.0936785			10.6486	0.237032			10.6486	-0.00181874
10.6557	0.0945789			10.6554	0.238406			10.6554	-0.00182301
10.6625	0.0954968			10.6621	0.239797			10.6621	-0.00182668
10.6692	0.0964268			10.6688	0.24122			10.6688	-0.00182937
10.6759	0.0973508			10.6756	0.242688			10.6756	-0.00183154
10.6827	0.0982791			10.6823	0.244149			10.6823	-0.00183394
10.6894	0.0992473			10.689	0.245568			10.689	-0.00183731
10.6961	0.100251			10.6958	0.246981			10.6958	-0.00184209
10.7029	0.101233			10.7025	0.248404			10.7025	-0.00184781
10.7096	0.102173			10.7092	0.249838			10.7092	-0.0018535
10.7163	0.10311			10.716	0.25129			10.716	-0.00185972
10.7231	0.104056			10.7227	0.25276			10.7227	-0.00186457
10.7298	0.105001			10.7294	0.254238			10.7294	-0.00186685
10.7365	0.10593			10.7362	0.255728			10.7362	-0.00186878
10.7433	0.106848			10.7429	0.25724			10.7429	-0.00187093
10.75	0.107775			10.7496	0.258772			10.7496	-0.00187317
10.7567	0.108714			10.7564	0.260325			10.7564	-0.00187545
10.7635	0.109648			10.7631	0.261885			10.7631	-0.00187785
10.7702	0.11058			10.7698	0.26343			10.7698	-0.00188034
10.7769	0.11151			10.7766	0.264967			10.7766	-0.00188231
10.7837	0.112425			10.7833	0.266513			10.7833	-0.00188351
10.7904	0.113343			10.79	0.268064			10.79	-0.00188461
10.7971	0.114278			10.7968	0.269627			10.7968	-0.00188589
10.8039	0.115213			10.8035	0.271207			10.8035	-0.00188733
10.8106	0.116131			10.8102	0.272795			10.8102	-0.00188875
10.8173	0.117036			10.817	0.274394			10.817	-0.00189042
10.8241	0.117936			10.8237	0.276006			10.8237	-0.00189275
10.8308	0.118828			10.8304	0.277641			10.8304	-0.00189547
10.8375	0.119711			10.8372	0.279284			10.8372	-0.00189773
10.8443	0.120579			10.8439	0.280918			10.8439	-0.00189872
10.851	0.121432			10.8506	0.282557			10.8506	-0.00189894
10.8577	0.12228			10.8574	0.284196			10.8574	-0.00189922
10.8645	0.123127			10.8641	0.285843			10.8641	-0.00189911
10.8712	0.123969			10.8708	0.287488			10.8708	-0.00189868
10.8779	0.124809			10.8776	0.289127			10.8776	-0.0018996
10.8847	0.125657			10.8843	0.290779			10.8843	-0.00190287
10.8914	0.126515			10.891	0.292442			10.891	-0.00190734
10.8981	0.127347			10.8978	0.294089			10.8978	-0.00191101
10.9049	0.128151			10.9045	0.295717			10.9045	-0.00191351
10.9116	0.128953			10.9112	0.297347			10.9112	-0.00191554
10.9183	0.129762			10.918	0.298974			10.918	-0.00191702
10.9251	0.130591			10.9247	0.300601			10.9247	-0.00191801
10.9318	0.131423			10.9314	0.302235			10.9314	-0.00191889
10.9385	0.13221			10.9382	0.303875			10.9382	-0.00191999
10.9453	0.132953			10.9449	0.30551			10.9449	-0.00192142
10.952	0.133676			10.9516	0.307144			10.9516	-0.00192235
10.9587	0.134394			10.9584	0.308796			10.9584	-0.00192262
10.9655	0.13511			10.9651	0.310469			10.9651	-0.00192341
10.9722	0.135816			10.9718	0.312132			10.9718	-0.0019252
10.9789	0.136513			10.9786	0.313744			10.9786	-0.00192767
10.9857	0.137203			10.9853	0.315323			10.9853	-0.00193034
10.9924	0.137888			10.992	0.316889			10.992	-0.00193133
10.9991	0.138574			10.9988	0.318448			10.9988	-0.00193088
11.0059	0.139254			11.0055	0.319999			11.0055	-0.00193144
11.0126	0.139933			11.0123	0.321553			11.0122	-0.00193373
11.0193	0.140606			11.019	0.323116			11.019	-0.00193893
11.0261	0.141256			11.0257	0.324663			11.0257	-0.00194551
11.0328	0.141889			11.0325	0.326188			11.0324	-0.00194867
11.0395	0.142505			11.0392	0.327708			11.0392	-0.00194871
11.0463	0.143107			11.0459	0.32921			11.0459	-0.00194906
11.053	0.143702			11.0527	0.330693			11.0526	-0.00195035
11.0597	0.144295			11.0594	0.332163			11.0594	-0.00195238
11.0665	0.144884			11.0661	0.333618			11.0661	-0.00195349
11.0732	0.145453			11.0729	0.335057			11.0728	-0.00195331
11.0799	0.146011			11.0796	0.336485			11.0796	-0.00195283
11.0867	0.146571			11.0863	0.337901			11.0863	-0.00195179
11.0934	0.147121			11.0931	0.339314			11.093	-0.00194928
11.1002	0.147667			11.0998	0.340724			11.0998	-0.00194599
11.1069	0.148232			11.1065	0.342105			11.1065	-0.00194346
11.1136	0.148784			11.1133	0.343453			11.1133	-0.00194212
11.1204	0.149295			11.12	0.344774			11.12	-0.00194215
11.1271	0.149784			11.1267	0.346088			11.1267	-0.00194293
11.1338	0.150264			11.1335	0.3474			11.1335	-0.00194389
11.1406	0.150735			11.1402	0.348702			11.1402	-0.00194393
11.1473	0.151209			11.1469	0.349975			11.1469	-0.0019428
11.154	0.151701			11.1537	0.351216			11.1537	-0.00194169
11.1608	0.152193			11.1604	0.352435			11.1604	-0.00194101
11.1675	0.152655			11.1671	0.353636			11.1671	-0.00194116
11.1742	0.1531			11.1739	0.354811			11.1739	-0.00194431
11.181	0.153538			11.1806	0.355963			11.1806	-0.00195127
11.1877	0.153976			11.1873	0.357099			11.1873	-0.00195939
11.1944	0.154402			11.1941	0.35823			11.1941	-0.00196704
11.2012	0.154815			11.2008	0.359355			11.2008	-0.00197418
11.2079	0.155232			11.2075	0.360451			11.2075	-0.00197968
11.2146	0.155641			11.2143	0.361522			11.2143	-0.00198278
11.2214	0.156032			11.221	0.362581			11.221	-0.00198425
11.2281	0.156416			11.2277	0.363621			11.2277	-0.00198484
11.2348	0.156801			11.2345	0.364643			11.2345	-0.00198592
11.2416	0.157187			11.2412	0.365654			11.2412	-0.00198839
11.2483	0.157567			11.2479	0.366657			11.2479	-0.00199276
11.255	0.157934			11.2547	0.36764			11.2547	-0.00199861
11.2618	0.158297			11.2614	0.368593			11.2614	-0.00200374
11.2685	0.158662			11.2681	0.369523			11.2681	-0.00200759
11.2752	0.159018			11.2749	0.370443			11.2749	-0.00201087
11.282	0.159365			11.2816	0.371339			11.2816	-0.00201189
11.2887	0.159711			11.2883	0.372207			11.2883	-0.00201087
11.2954	0.160059			11.2951	0.373057			11.2951	-0.0020102
11.3022	0.160404			11.3018	0.373883			11.3018	-0.00201042
11.3089	0.16074			11.3085	0.374674			11.3085	-0.00201184
11.3156	0.161067			11.3153	0.375441			11.3153	-0.00201441
11.3224	0.161384			11.322	0.376202			11.322	-0.00201759
11.3291	0.161701			11.3287	0.376956			11.3287	-0.00201933
11.3358	0.162021			11.3355	0.377689			11.3355	-0.00201908
11.3426	0.162347			11.3422	0.3784			11.3422	-0.00201827
11.3493	0.162666			11.3489	0.379092			11.3489	-0.00201631
11.356	0.162967			11.3557	0.379771			11.3557	-0.00201351
11.3628	0.163263			11.3624	0.380449			11.3624	-0.0020109
11.3695	0.163564			11.3691	0.38112			11.3691	-0.002008
11.3762	0.163867			11.3759	0.381756			11.3759	-0.00200467
11.383	0.164174			11.3826	0.382355			11.3826	-0.00200155
11.3897	0.164481			11.3893	0.382935			11.3893	-0.0019992
11.3964	0.164788			11.3961	0.383502			11.3961	-0.00199956
11.4032	0.165085			11.4028	0.384052			11.4028	-0.00200075
11.4099	0.165368			11.4095	0.384579			11.4095	-0.00199767
11.4166	0.165642			11.4163	0.385094			11.4163	-0.00199149
11.4234	0.165908			11.423	0.3856			11.423	-0.00198619
11.4301	0.166174			11.4297	0.38609			11.4297	-0.00198344
11.4368	0.166444			11.4365	0.386565			11.4365	-0.00198335
11.4436	0.166712			11.4432	0.387022			11.4432	-0.00198623
11.4503	0.166972			11.4499	0.38746			11.4499	-0.00199253
11.457	0.167237			11.4567	0.387885			11.4567	-0.00200124
11.4638	0.167514			11.4634	0.388297			11.4634	-0.00200786
11.4705	0.167793			11.4702	0.388691			11.4701	-0.00201052
11.4772	0.168063			11.4769	0.389051			11.4769	-0.00201176
11.484	0.16833			11.4836	0.389381			11.4836	-0.00201287
11.4907	0.168599			11.4904	0.38969			11.4903	-0.00201437
11.4974	0.168873			11.4971	0.389978			11.4971	-0.00201743
11.5042	0.16916			11.5038	0.39025			11.5038	-0.00202122
11.5109	0.16945			11.5106	0.390507			11.5105	-0.002024
11.5176	0.169736			11.5173	0.390744			11.5173	-0.00202564
11.5244	0.170026			11.524	0.390964			11.524	-0.00202627
11.5311	0.170317			11.5308	0.391176			11.5307	-0.0020273
11.5378	0.170606			11.5375	0.391371			11.5375	-0.00202949
11.5446	0.170903			11.5442	0.391547			11.5442	-0.00203441
11.5513	0.171206			11.551	0.391703			11.5509	-0.00204148
11.5581	0.171523			11.5577	0.391841			11.5577	-0.00204835
11.5648	0.17185			11.5644	0.391957			11.5644	-0.00205492
11.5715	0.172173			11.5712	0.392045			11.5712	-0.00205938
11.5783	0.172504			11.5779	0.392106			11.5779	-0.00205938
11.585	0.172857			11.5846	0.39214			11.5846	-0.00205691
11.5917	0.173259			11.5914	0.392149			11.5914	-0.00205499
11.5985	0.173691			11.5981	0.392143			11.5981	-0.00205437
11.6052	0.174115			11.6048	0.392122			11.6048	-0.00205542
11.6119	0.174561			11.6116	0.392084			11.6116	-0.00205699
11.6187	0.175045			11.6183	0.39203			11.6183	-0.00205755
11.6254	0.175542			11.625	0.391959			11.625	-0.00205726
11.6321	0.176041			11.6318	0.391867			11.6318	-0.00205688
11.6389	0.176564			11.6385	0.391766			11.6385	-0.00205665
11.6456	0.177118			11.6452	0.391633			11.6452	-0.00205677
11.6523	0.177694			11.652	0.391453			11.652	-0.0020574
11.6591	0.178307			11.6587	0.391243			11.6587	-0.00205938
11.6658	0.178961			11.6654	0.391007			11.6654	-0.00206343
11.6725	0.179668			11.6722	0.390767			11.6722	-0.0020674
11.6793	0.18045			11.6789	0.390515			11.6789	-0.00206819
11.686	0.181293			11.6856	0.390217			11.6856	-0.00206597
11.6927	0.182164			11.6924	0.389879			11.6924	-0.00206343
11.6995	0.183061			11.6991	0.38952			11.6991	-0.00206231
11.7062	0.184002			11.7058	0.389138			11.7058	-0.00206322
11.7129	0.185003			11.7126	0.388728			11.7126	-0.00206572
11.7197	0.186091			11.7193	0.38829			11.7193	-0.00206848
11.7264	0.187262			11.726	0.387824			11.726	-0.00207006
11.7331	0.188487			11.7328	0.387333			11.7328	-0.00206933
11.7399	0.189771			11.7395	0.386823			11.7395	-0.00206717
11.7466	0.191122			11.7462	0.38629			11.7462	-0.0020645
11.7533	0.192549			11.753	0.38573			11.753	-0.00206253
11.7601	0.194097			11.7597	0.385145			11.7597	-0.00206246
11.7668	0.19575			11.7664	0.384537			11.7664	-0.00206504
11.7735	0.197468			11.7732	0.383898			11.7732	-0.0020682
11.7803	0.199259			11.7799	0.383227			11.7799	-0.0020693
11.787	0.20115			11.7866	0.382531			11.7866	-0.00206954
11.7937	0.203154			11.7934	0.381809			11.7934	-0.0020699
11.8005	0.20528			11.8001	0.381069			11.8001	-0.00207051
11.8072	0.207518			11.8068	0.380314			11.8068	-0.00207151
11.8139	0.209868			11.8136	0.379538			11.8136	-0.00207301
11.8207	0.212368			11.8203	0.37874			11.8203	-0.00207433
11.8274	0.214997			11.827	0.377927			11.827	-0.00207434
11.8341	0.217737			11.8338	0.377119			11.8338	-0.00207296
11.8409	0.220624			11.8405	0.376289			11.8405	-0.00207097
11.8476	0.223688			11.8472	0.375405			11.8472	-0.00206884
11.8543	0.226887			11.854	0.374489			11.854	-0.0020669
11.8611	0.230201			11.8607	0.373549			11.8607	-0.00206552
11.8678	0.233707			11.8674	0.37259			11.8674	-0.00206531
11.8745	0.23736			11.8742	0.371615			11.8742	-0.00206469
11.8813	0.241127			11.8809	0.370623			11.8809	-0.0020626
11.888	0.245063			11.8876	0.36961			11.8876	-0.0020597
11.8947	0.249206			11.8944	0.36858			11.8944	-0.00205582
11.9015	0.253548			11.9011	0.367544			11.9011	-0.00205082
11.9082	0.258066			11.9078	0.366521			11.9078	-0.00204415
11.9149	0.262771			11.9146	0.365495			11.9146	-0.00203721
11.9217	0.267645			11.9213	0.364424			11.9213	-0.00203142
11.9284	0.272687			11.9281	0.363327			11.928	-0.00202714
11.9351	0.277916			11.9348	0.362228			11.9348	-0.00202369
11.9419	0.283321			11.9415	0.361126			11.9415	-0.0020196
11.9486	0.28893			11.9483	0.360018			11.9482	-0.00201458
11.9553	0.294766			11.955	0.358902			11.955	-0.00200939
11.9621	0.30077			11.9617	0.357782			11.9617	-0.00200464
11.9688	0.306946			11.9685	0.35666			11.9684	-0.00200086
11.9755	0.313327			11.9752	0.35554			11.9752	-0.0019981
11.9823	0.319905			11.9819	0.354423			11.9819	-0.00199535
11.989	0.32669			11.9887	0.35331			11.9886	-0.00199269
11.9957	0.333676			11.9954	0.352207			11.9954	-0.00199151
12.0025	0.340901			12.0021	0.351117			12.0021	-0.0019915
12.0092	0.348356			12.0089	0.350039			12.0088	-0.00199176
12.0159	0.35598			12.0156	0.34898			12.0156	-0.00199021
12.0227	0.363795			12.0223	0.347951			12.0223	-0.00198512
12.0294	0.371761			12.0291	0.346949			12.0291	-0.00197503
12.0362	0.379856			12.0358	0.345964			12.0358	-0.00196301
12.0429	0.3881			12.0425	0.345003			12.0425	-0.00195441
12.0496	0.396535			12.0493	0.34408			12.0493	-0.00195022
12.0564	0.405218			12.056	0.343187			12.056	-0.00194878
12.0631	0.414057			12.0627	0.342311			12.0627	-0.0019465
12.0698	0.423005			12.0695	0.341471			12.0695	-0.00194315
12.0766	0.432144			12.0762	0.340668			12.0762	-0.00193913
12.0833	0.441546			12.0829	0.339899			12.0829	-0.00193433
12.09	0.451134			12.0897	0.339175			12.0897	-0.00192952
12.0968	0.460899			12.0964	0.338503			12.0964	-0.00192413
12.1035	0.470809			12.1031	0.337888			12.1031	-0.00191801
12.1102	0.480735			12.1099	0.337335			12.1099	-0.00191095
12.117	0.49076			12.1166	0.336847			12.1166	-0.001902
12.1237	0.500891			12.1233	0.336427			12.1233	-0.00189194
12.1304	0.511103			12.1301	0.336073			12.1301	-0.00188224
12.1372	0.521392			12.1368	0.33579			12.1368	-0.00187375
12.1439	0.531765			12.1435	0.335588			12.1435	-0.0018668
12.1506	0.542233			12.1503	0.335467			12.1503	-0.0018615
12.1574	0.552801			12.157	0.335428			12.157	-0.00185679
12.1641	0.563473			12.1637	0.335481			12.1637	-0.00185097
12.1708	0.574266			12.1705	0.335621			12.1705	-0.00184402
12.1776	0.585115			12.1772	0.335845			12.1772	-0.00183543
12.1843	0.59595			12.1839	0.33617			12.1839	-0.00182491
12.191	0.606807			12.1907	0.336608			12.1907	-0.00181325
12.1978	0.617727			12.1974	0.337154			12.1974	-0.00180136
12.2045	0.628731			12.2041	0.337809			12.2041	-0.00179027
12.2112	0.63977			12.2109	0.338591			12.2109	-0.00178067
12.218	0.65081			12.2176	0.339505			12.2176	-0.00177317
12.2247	0.661773			12.2243	0.340549			12.2243	-0.00176794
12.2314	0.672621			12.2311	0.341729			12.2311	-0.00176324
12.2382	0.683444			12.2378	0.34305			12.2378	-0.00175619
12.2449	0.694249			12.2445	0.344511			12.2445	-0.00174737
12.2516	0.704974			12.2513	0.346122			12.2513	-0.00173642
12.2584	0.715606			12.258	0.347886			12.258	-0.0017237
12.2651	0.726165			12.2647	0.349806			12.2647	-0.00171205
12.2718	0.736656			12.2715	0.351897			12.2715	-0.00170169
12.2786	0.747071			12.2782	0.354165			12.2782	-0.00169273
12.2853	0.757389			12.2849	0.35664			12.2849	-0.00168519
12.292	0.767616			12.2917	0.359303			12.2917	-0.00167856
12.2988	0.777807			12.2984	0.36209			12.2984	-0.00167222
12.3055	0.787958			12.3051	0.365057			12.3051	-0.00166498
12.3122	0.797963			12.3119	0.368218			12.3119	-0.00165543
12.319	0.807772			12.3186	0.37154			12.3186	-0.00164427
12.3257	0.817374			12.3253	0.375061			12.3253	-0.00163331
12.3324	0.826758			12.3321	0.378787			12.3321	-0.00162379
12.3392	0.835925			12.3388	0.382718			12.3388	-0.00161621
12.3459	0.844894			12.3455	0.386863			12.3455	-0.00161018
12.3526	0.85368			12.3523	0.391231			12.3523	-0.00160299
12.3594	0.86232			12.359	0.39581			12.359	-0.00159248
12.3661	0.870762			12.3657	0.400569			12.3657	-0.0015808
12.3728	0.878937			12.3725	0.405507			12.3725	-0.00157043
12.3796	0.886921			12.3792	0.410652			12.3792	-0.00156186
12.3863	0.894701			12.386	0.416015			12.3859	-0.0015537
12.393	0.902237			12.3927	0.421702			12.3927	-0.00154543
12.3998	0.909593			12.3994	0.427777			12.3994	-0.001538
12.4065	0.916726			12.4062	0.433956			12.4061	-0.00153061
12.4132	0.923595			12.4129	0.44013			12.4129	-0.00151978
12.42	0.93022			12.4196	0.446489			12.4196	-0.00150597
12.4267	0.936545			12.4264	0.45307			12.4263	-0.00149337
12.4334	0.942531			12.4331	0.459857			12.4331	-0.0014825
12.4402	0.948184			12.4398	0.466845			12.4398	-0.00147307
12.4469	0.953545			12.4466	0.474029			12.4465	-0.00146442
12.4536	0.958631			12.4533	0.481399			12.4533	-0.00145625
12.4604	0.963445			12.46	0.488956			12.46	-0.00144871
12.4671	0.96798			12.4668	0.496688			12.4667	-0.00144094
12.4738	0.972225			12.4735	0.504586			12.4735	-0.00143193
12.4806	0.97618			12.4802	0.512666			12.4802	-0.00142224
12.4873	0.979843			12.487	0.52096			12.487	-0.00141322
12.4941	0.98323			12.4937	0.529431			12.4937	-0.00140538
12.5008	0.98633			12.5004	0.538021			12.5004	-0.00139821
12.5075	0.989109			12.5072	0.546774			12.5072	-0.00139155
12.5143	0.991563			12.5139	0.55569			12.5139	-0.00138604
12.521	0.993702			12.5206	0.564759			12.5206	-0.00138191
12.5277	0.995557			12.5274	0.57398			12.5274	-0.00137834
12.5345	0.997104			12.5341	0.583333			12.5341	-0.00137505
12.5412	0.998313			12.5408	0.592812			12.5408	-0.00137258
12.5479	0.999191			12.5476	0.602413			12.5476	-0.00137002
12.5547	0.999748			12.5543	0.612101			12.5543	-0.00136579
12.5614	1			12.561	0.621865			12.561	-0.00136045
12.5681	0.999952			12.5678	0.631714			12.5678	-0.00135562
12.5749	0.999604			12.5745	0.641681			12.5745	-0.0013516
12.5816	0.998955			12.5812	0.651695			12.5812	-0.00134842
12.5883	0.998016			12.588	0.6617			12.588	-0.00134615
12.5951	0.996788			12.5947	0.671741			12.5947	-0.00134379
12.6018	0.995266			12.6014	0.681814			12.6014	-0.00133919
12.6085	0.993472			12.6082	0.691908			12.6082	-0.0013331
12.6153	0.9914			12.6149	0.702005			12.6149	-0.00132785
12.622	0.989022			12.6216	0.71211			12.6216	-0.00132385
12.6287	0.986354			12.6284	0.722216			12.6284	-0.00132212
12.6355	0.983417			12.6351	0.732315			12.6351	-0.00132172
12.6422	0.980216			12.6418	0.742372			12.6418	-0.00132086
12.6489	0.976755			12.6486	0.752354			12.6486	-0.00131976
12.6557	0.973042			12.6553	0.762255			12.6553	-0.00131526
12.6624	0.969084			12.662	0.772072			12.662	-0.001307
12.6691	0.96489			12.6688	0.7818			12.6688	-0.00130013
12.6759	0.960466			12.6755	0.791443			12.6755	-0.00129687
12.6826	0.955814			12.6822	0.801007			12.6822	-0.00129737
12.6893	0.950932			12.689	0.810453			12.689	-0.0013008
12.6961	0.945811			12.6957	0.819751			12.6957	-0.00130517
12.7028	0.940466			12.7024	0.828905			12.7024	-0.00130911
12.7095	0.934919			12.7092	0.837916			12.7092	-0.0013125
12.7163	0.929167			12.7159	0.846768			12.7159	-0.00131575
12.723	0.923214			12.7226	0.855452			12.7226	-0.00131896
12.7297	0.917076			12.7294	0.863967			12.7294	-0.00132226
12.7365	0.910754			12.7361	0.872303			12.7361	-0.00132632
12.7432	0.904247			12.7428	0.880439			12.7428	-0.00133082
12.7499	0.897587			12.7496	0.888352			12.7496	-0.00133329
12.7567	0.890798			12.7563	0.896035			12.7563	-0.00133331
12.7634	0.883844			12.763	0.903509			12.763	-0.00133273
12.7701	0.876702			12.7698	0.91077			12.7698	-0.00133213
12.7769	0.869402			12.7765	0.917796			12.7765	-0.00132934
12.7836	0.861975			12.7832	0.924573			12.7832	-0.00132484
12.7903	0.854407			12.79	0.931119			12.79	-0.00132187
12.7971	0.846692			12.7967	0.937478			12.7967	-0.00132158
12.8038	0.838856			12.8034	0.943569			12.8034	-0.00132353
12.8105	0.830929			12.8102	0.94931			12.8102	-0.00132335
12.8173	0.822918			12.8169	0.954755			12.8169	-0.00132079
12.824	0.814843			12.8236	0.959937			12.8236	-0.00131965
12.8307	0.806714			12.8304	0.964835			12.8304	-0.00132363
12.8375	0.798498			12.8371	0.969419			12.8371	-0.00133177
12.8442	0.790175			12.8439	0.97369			12.8438	-0.0013385
12.8509	0.781763			12.8506	0.977649			12.8506	-0.00134353
12.8577	0.773289			12.8573	0.981295			12.8573	-0.00134846
12.8644	0.764747			12.8641	0.984632			12.864	-0.0013543
12.8711	0.756211			12.8708	0.987645			12.8708	-0.00136104
12.8779	0.747691			12.8775	0.990327			12.8775	-0.00136448
12.8846	0.739086			12.8843	0.992698			12.8842	-0.00134771
12.8913	0.730349			12.891	0.994754			12.891	-0.0013168
12.8981	0.721516			12.8977	0.996474			12.8977	-0.00129512
12.9048	0.712665			12.9045	0.997853			12.9044	-0.00128709
12.9115	0.703815			12.9112	0.99889			12.9112	-0.00129097
12.9183	0.694968			12.9179	0.999608			12.9179	-0.00130264
12.925	0.686131			12.9247	0.999988			12.9246	-0.00131884
12.9317	0.677319			12.9314	1			12.9314	-0.00133283
12.9385	0.668517			12.9381	0.99968			12.9381	-0.00134362
12.9452	0.659701			12.9449	0.999033			12.9449	-0.00135341
12.952	0.650888			12.9516	0.998066			12.9516	-0.00136272
12.9587	0.642104			12.9583	0.996773			12.9583	-0.00137191
12.9654	0.633357			12.9651	0.995176			12.9651	-0.00138208
12.9722	0.624629			12.9718	0.993264			12.9718	-0.00139333
12.9789	0.615901			12.9785	0.991009			12.9785	-0.00140449
12.9856	0.607234			12.9853	0.988445			12.9853	-0.0014153
12.9924	0.598597			12.992	0.985573			12.992	-0.00142493
12.9991	0.589926			12.9987	0.982401			12.9987	-0.00143204
13.0058	0.581316			13.0055	0.978917			13.0055	-0.00143686
13.0126	0.572786			13.0122	0.975114			13.0122	-0.00144126
13.0193	0.564316			13.0189	0.971012			13.0189	-0.00144643
13.026	0.556			13.0257	0.966629			13.0257	-0.00145252
13.0328	0.547783			13.0324	0.961991			13.0324	-0.00145972
13.0395	0.539544			13.0391	0.957108			13.0391	-0.00146699
13.0462	0.531334			13.0459	0.951956			13.0459	-0.00147228
13.053	0.523247			13.0526	0.946525			13.0526	-0.00147423
13.0597	0.515234			13.0593	0.940808			13.0593	-0.00147395
13.0664	0.507217			13.0661	0.934827			13.0661	-0.00147329
13.0732	0.499255			13.0728	0.928601			13.0728	-0.00147245
13.0799	0.491376			13.0795	0.922141			13.0795	-0.00147175
13.0866	0.483627			13.0863	0.915437			13.0863	-0.00147157
13.0934	0.475966			13.093	0.908475			13.093	-0.00147225
13.1001	0.4683			13.0997	0.901283			13.0997	-0.00147402
13.1068	0.460673			13.1065	0.893895			13.1065	-0.0014752
13.1136	0.453141			13.1132	0.886324			13.1132	-0.00147454
13.1203	0.445726			13.1199	0.878548			13.1199	-0.00147274
13.127	0.438484			13.1267	0.870568			13.1267	-0.00147051
13.1338	0.431361			13.1334	0.862393			13.1334	-0.00146758
13.1405	0.424263			13.1401	0.854037			13.1401	-0.00146349
13.1472	0.417243			13.1469	0.845526			13.1469	-0.00145888
13.154	0.410321			13.1536	0.836868			13.1536	-0.00145373
13.1607	0.403477			13.1603	0.828071			13.1603	-0.00144829
13.1674	0.396705			13.1671	0.819126			13.1671	-0.00144298
13.1742	0.390016			13.1738	0.810041			13.1738	-0.00143766
13.1809	0.383428			13.1805	0.800833			13.1805	-0.00143183
13.1876	0.376912			13.1873	0.791509			13.1873	-0.00142559
13.1944	0.370446			13.194	0.782065			13.194	-0.00141946
13.2011	0.364072			13.2007	0.772507			13.2007	-0.00141333
13.2078	0.357823			13.2075	0.762862			13.2075	-0.00140749
13.2146	0.351685			13.2142	0.753138			13.2142	-0.00140235
13.2213	0.34565			13.2209	0.743341			13.2209	-0.00139669
13.228	0.339752			13.2277	0.733488			13.2277	-0.00138957
13.2348	0.333955			13.2344	0.723583			13.2344	-0.00138157
13.2415	0.328219			13.2411	0.713635			13.2411	-0.00137089
13.2482	0.322608			13.2479	0.703652			13.2479	-0.00135772
13.255	0.317107			13.2546	0.693634			13.2546	-0.0013443
13.2617	0.311653			13.2613	0.683574			13.2613	-0.00132792
13.2684	0.306258			13.2681	0.673476			13.2681	-0.0013093
13.2752	0.300939			13.2748	0.663355			13.2748	-0.00129204
13.2819	0.295751			13.2815	0.653228			13.2815	-0.00127576
13.2886	0.29072			13.2883	0.643109			13.2883	-0.00126006
13.2954	0.28579			13.295	0.632991			13.295	-0.00124483
13.3021	0.280869			13.3018	0.622897			13.3017	-0.00122935
13.3088	0.275977			13.3085	0.612853			13.3085	-0.00121419
13.3156	0.271182			13.3152	0.602818			13.3152	-0.00120003
13.3223	0.266477			13.322	0.592804			13.3219	-0.00118538
13.329	0.261873			13.3287	0.582852			13.3287	-0.0011691
13.3358	0.257349			13.3354	0.572975			13.3354	-0.00115274
13.3425	0.252903			13.3422	0.563168			13.3421	-0.00113605
13.3492	0.248538			13.3489	0.553428			13.3489	-0.00111733
13.356	0.244257			13.3556	0.543755			13.3556	-0.00109631
13.3627	0.240063			13.3624	0.534148			13.3623	-0.00107108
13.3694	0.235953			13.3691	0.524619			13.3691	-0.00104407
13.3762	0.231912			13.3758	0.515167			13.3758	-0.00101979
13.3829	0.227939			13.3826	0.505811			13.3825	-0.000998113
13.3896	0.224034			13.3893	0.496559			13.3893	-0.000977081
13.3964	0.220202			13.396	0.487396			13.396	-0.000956036
13.4031	0.216451			13.4028	0.478344			13.4028	-0.000935169
13.4099	0.212781			13.4095	0.46945			13.4095	-0.000911859
13.4166	0.209193			13.4162	0.460665			13.4162	-0.000884125
13.4233	0.205736			13.423	0.451956			13.423	-0.000854229
13.4301	0.202382			13.4297	0.443362			13.4297	-0.000824927
13.4368	0.199054			13.4364	0.434893			13.4364	-0.000794702
13.4435	0.19578			13.4432	0.42656			13.4432	-0.000761771
13.4503	0.192567			13.4499	0.418384			13.4499	-0.000727083
13.457	0.189397			13.4566	0.410351			13.4566	-0.000693411
13.4637	0.186289			13.4634	0.402425			13.4634	-0.000660632
13.4705	0.18326			13.4701	0.394607			13.4701	-0.000625246
13.4772	0.180304			13.4768	0.386902			13.4768	-0.000586345
13.4839	0.177397			13.4836	0.37933			13.4836	-0.000545896
13.4907	0.174542			13.4903	0.371907			13.4903	-0.000503232
13.4974	0.171744			13.497	0.364619			13.497	-0.000456811
13.5041	0.168992			13.5038	0.357466			13.5038	-0.000408021
13.5109	0.166303			13.5105	0.350468			13.5105	-0.000360366
13.5176	0.163718			13.5172	0.343613			13.5172	-0.000314591
13.5243	0.161206			13.524	0.33689			13.524	-0.000267437
13.5311	0.158716			13.5307	0.330304			13.5307	-0.000215125
13.5378	0.156254			13.5374	0.323859			13.5374	-0.000155745
13.5445	0.15386			13.5442	0.31756			13.5442	-9.26115e-05
13.5513	0.151532			13.5509	0.311414			13.5509	-2.85013e-05
13.558	0.149271			13.5576	0.305465			13.5576	3.37931e-05
13.5647	0.147053			13.5644	0.299652			13.5644	9.52242e-05
13.5715	0.144838			13.5711	0.293924			13.5711	0.000158305
13.5782	0.142668			13.5778	0.288337			13.5778	0.000225736
13.5849	0.140556			13.5846	0.282874			13.5846	0.000299583
13.5917	0.138478			13.5913	0.277524			13.5913	0.000376826
13.5984	0.136437			13.598	0.272298			13.598	0.00045548
13.6051	0.134459			13.6048	0.267203			13.6048	0.000536874
13.6119	0.132531			13.6115	0.26225			13.6115	0.000621153
13.6186	0.130637			13.6182	0.257441			13.6182	0.000705716
13.6253	0.128791			13.625	0.252772			13.625	0.000792218
13.6321	0.126981			13.6317	0.248242			13.6317	0.000882882
13.6388	0.125208			13.6384	0.243844			13.6384	0.000981859
13.6455	0.12347			13.6452	0.239565			13.6452	0.0010883
13.6523	0.121764			13.6519	0.235405			13.6519	0.00119501
13.659	0.120097			13.6586	0.23136			13.6586	0.00130417
13.6657	0.11846			13.6654	0.22743			13.6654	0.00141995
13.6725	0.116855			13.6721	0.223615			13.6721	0.00154532
13.6792	0.115287			13.6788	0.219919			13.6788	0.00167904
13.6859	0.113752			13.6856	0.216327			13.6856	0.00181616
13.6927	0.112251			13.6923	0.212832			13.6923	0.00195357
13.6994	0.110784			13.699	0.209453			13.699	0.00209391
13.7061	0.109353			13.7058	0.206178			13.7058	0.00224293
13.7129	0.107971			13.7125	0.20299			13.7125	0.00240304
13.7196	0.106632			13.7192	0.199905			13.7192	0.00257576
13.7263	0.105315			13.726	0.196924			13.726	0.00275797
13.7331	0.104013			13.7327	0.194055			13.7327	0.00294928
13.7398	0.102737			13.7394	0.191295			13.7394	0.00315009
13.7465	0.101493			13.7462	0.188613			13.7462	0.0033591
13.7533	0.100286			13.7529	0.185995			13.7529	0.00358098
13.76	0.0990999			13.7597	0.183463			13.7596	0.00381694
13.7667	0.0979168			13.7664	0.18104			13.7664	0.0040614
13.7735	0.0967473			13.7731	0.178704			13.7731	0.00431804
13.7802	0.0956057			13.7799	0.176458			13.7798	0.00459924
13.7869	0.0945079			13.7866	0.174287			13.7866	0.00490973
13.7937	0.0934313			13.7933	0.172139			13.7933	0.00522813
13.8004	0.0923669			13.8001	0.170044			13.8	0.00554621
13.8071	0.0913527			13.8068	0.168018			13.8068	0.00587979
13.8139	0.0903948			13.8135	0.166065			13.8135	0.00623134
13.8206	0.0894317			13.8203	0.164182			13.8202	0.00660563
13.8273	0.0884501			13.827	0.162359			13.827	0.00701718
13.8341	0.0874935			13.8337	0.16059			13.8337	0.00746846
13.8408	0.086557			13.8405	0.158882			13.8404	0.00793492
13.8475	0.0856319			13.8472	0.157231			13.8472	0.00840527
13.8543	0.0847158			13.8539	0.155633			13.8539	0.00889205
13.861	0.0838186			13.8607	0.154087			13.8607	0.00940677
13.8678	0.0829412			13.8674	0.152618			13.8674	0.00995561
13.8745	0.0820836			13.8741	0.151206			13.8741	0.010544
13.8812	0.0812431			13.8809	0.149805			13.8809	0.0111746
13.888	0.080414			13.8876	0.148439			13.8876	0.0118372
13.8947	0.0795978			13.8943	0.14712			13.8943	0.0125246
13.9014	0.0788009			13.9011	0.145831			13.9011	0.0132459
13.9082	0.0780247			13.9078	0.144572			13.9078	0.0140103
13.9149	0.0772677			13.9145	0.143354			13.9145	0.014829
13.9216	0.076527			13.9213	0.142174			13.9213	0.015704
13.9284	0.0757977			13.928	0.141036			13.928	0.016631
13.9351	0.0750817			13.9347	0.139943			13.9347	0.0176106
13.9418	0.0743865			13.9415	0.138887			13.9415	0.018654
13.9486	0.0737172			13.9482	0.13784			13.9482	0.0197299
13.9553	0.0730696			13.9549	0.136802			13.9549	0.0208283
13.962	0.0724252			13.9617	0.135791			13.9617	0.0219877
13.9688	0.071789			13.9684	0.134803			13.9684	0.0231772
13.9755	0.0711694			13.9751	0.133833			13.9751	0.0243932
13.9822	0.0705543			13.9819	0.132876			13.9819	0.0256639
13.989	0.0699325			13.9886	0.131939			13.9886	0.0270004
13.9957	0.0693036			13.9953	0.131023			13.9953	0.0284065
14.0024	0.0686988			14.0021	0.130126			14.0021	0.0298772
14.0092	0.0681203			14.0088	0.129244			14.0088	0.0314151
14.0159	0.067534			14.0155	0.128379			14.0155	0.0330247
14.0226	0.0669453			14.0223	0.12753			14.0223	0.0347048
14.0294	0.0663672			14.029	0.126698			14.029	0.036442
14.0361	0.0657956			14.0357	0.125885			14.0357	0.0382337
14.0428	0.0652386			14.0425	0.125084			14.0425	0.0400902
14.0496	0.0646997			14.0492	0.124294			14.0492	0.0420115
14.0563	0.0641668			14.0559	0.123514			14.0559	0.0439959
14.063	0.0636333			14.0627	0.122738			14.0627	0.0460609
14.0698	0.0631052			14.0694	0.121962			14.0694	0.0482393
14.0765	0.0625857			14.0761	0.121182			14.0761	0.0504636
14.0832	0.0620799			14.0829	0.120407			14.0829	0.0526931
14.09	0.0615861			14.0896	0.119648			14.0896	0.0549957
14.0967	0.0610942			14.0963	0.118896			14.0963	0.0573918
14.1034	0.0606136			14.1031	0.118135			14.1031	0.0598449
14.1102	0.0601452			14.1098	0.117368			14.1098	0.0623347
14.1169	0.0596821			14.1165	0.11661			14.1165	0.0648934
14.1236	0.059238			14.1233	0.115862			14.1233	0.0675225
14.1304	0.0588			14.13	0.115118			14.13	0.0701989
14.1371	0.0583552			14.1367	0.114385			14.1367	0.0729246
14.1438	0.0579166			14.1435	0.113657			14.1435	0.0757136
14.1506	0.057476			14.1502	0.112918			14.1502	0.0785559
14.1573	0.0570364			14.1569	0.112167			14.1569	0.0814626
14.164	0.0566074			14.1637	0.111412			14.1637	0.0844307
14.1708	0.0561782			14.1704	0.110667			14.1704	0.0874567
14.1775	0.0557496			14.1771	0.109917			14.1771	0.0905227
14.1842	0.05533			14.1839	0.109148			14.1839	0.0935851
14.191	0.0549141			14.1906	0.108372			14.1906	0.0966751
14.1977	0.0545045			14.1973	0.107602			14.1973	0.0998093
14.2044	0.0541182			14.2041	0.10684			14.2041	0.102991
14.2112	0.0537605			14.2108	0.106066			14.2108	0.106216
14.2179	0.0534233			14.2176	0.105281			14.2175	0.109474
14.2246	0.0530654			14.2243	0.104493			14.2243	0.11276
14.2314	0.0526788			14.231	0.103704			14.231	0.116063
14.2381	0.0522989			14.2378	0.102916			14.2377	0.11938
14.2448	0.0519264			14.2445	0.102142			14.2445	0.12271
14.2516	0.0515567			14.2512	0.101387			14.2512	0.126047
14.2583	0.0511839			14.258	0.100618			14.2579	0.129385
14.265	0.0508189			14.2647	0.0998162			14.2647	0.132737
14.2718	0.0504665			14.2714	0.0990008			14.2714	0.136105
14.2785	0.0501146			14.2782	0.0981829			14.2781	0.13946
14.2852	0.0497494			14.2849	0.0973751			14.2849	0.142797
14.292	0.0493715			14.2916	0.0965672			14.2916	0.146135
14.2987	0.0489951			14.2984	0.0957368			14.2983	0.14948
14.3054	0.0486256			14.3051	0.0948972			14.3051	0.152854
14.3122	0.0482753			14.3118	0.0940592			14.3118	0.156236
14.3189	0.0479388			14.3186	0.0932193			14.3186	0.159568
14.3257	0.0476007			14.3253	0.0923751			14.3253	0.162855
14.3324	0.0472572			14.332	0.0915312			14.332	0.166115
14.3391	0.04691			14.3388	0.0906914			14.3388	0.169338
14.3459	0.0465676			14.3455	0.0898556			14.3455	0.172524
14.3526	0.0462325			14.3522	0.0890159			14.3522	0.175694
14.3593	0.0459018			14.359	0.0881722			14.359	0.178853
14.3661	0.0455741			14.3657	0.0873259			14.3657	0.18195
14.3728	0.0452524			14.3724	0.0864755			14.3724	0.184974
14.3795	0.0449287			14.3792	0.0856202			14.3792	0.187954
14.3863	0.0445947			14.3859	0.0847646			14.3859	0.190892
14.393	0.0442621			14.3926	0.0839122			14.3926	0.193786
14.3997	0.0439359			14.3994	0.0830537			14.3994	0.196636
14.4065	0.0436136			14.4061	0.0821893			14.4061	0.199451
14.4132	0.0433007			14.4128	0.0813372			14.4128	0.202232
14.4199	0.0429972			14.4196	0.0804955			14.4196	0.204949
14.4267	0.0426948			14.4263	0.079651			14.4263	0.20758
14.4334	0.0423929			14.433	0.0787981			14.433	0.210135
14.4401	0.0421014			14.4398	0.0779448			14.4398	0.21262
14.4469	0.0418166			14.4465	0.0771086			14.4465	0.215036
14.4536	0.0415289			14.4532	0.0762804			14.4532	0.217372
14.4603	0.041243			14.46	0.0754416			14.46	0.219619
14.4671	0.0409561			14.4667	0.074598			14.4667	0.221784
14.4738	0.0406617			14.4734	0.0737495			14.4734	0.223869
14.4805	0.040364			14.4802	0.0728886			14.4802	0.225887
14.4873	0.0400754			14.4869	0.0720348			14.4869	0.227839
14.494	0.0397981			14.4936	0.0711845			14.4936	0.229719
14.5007	0.0395262			14.5004	0.0703416			14.5004	0.231531
14.5075	0.0392558			14.5071	0.0695093			14.5071	0.233277
14.5142	0.0389817			14.5138	0.0686723			14.5138	0.234954
14.5209	0.0387078			14.5206	0.0678371			14.5206	0.236561
14.5277	0.0384365			14.5273	0.0670114			14.5273	0.238095
14.5344	0.0381662			14.534	0.0661992			14.534	0.239555
14.5411	0.0379015			14.5408	0.0654005			14.5408	0.240942
14.5479	0.0376434			14.5475	0.0645987			14.5475	0.24225
14.5546	0.0373891			14.5542	0.0637901			14.5542	0.243467
14.5613	0.037135			14.561	0.0629874			14.561	0.244602
14.5681	0.0368804			14.5677	0.0621896			14.5677	0.245671
14.5748	0.0366261			14.5744	0.061397			14.5744	0.246679
14.5815	0.036376			14.5812	0.0606125			14.5812	0.247628
14.5883	0.0361341			14.5879	0.0598428			14.5879	0.248524
14.595	0.0358915			14.5946	0.0590801			14.5946	0.249368
14.6017	0.0356428			14.6014	0.0583199			14.6014	0.250164
14.6085	0.0353919			14.6081	0.0575716			14.6081	0.250912
14.6152	0.0351473			14.6148	0.0568348			14.6148	0.251618
14.6219	0.0349155			14.6216	0.0561174			14.6216	0.252291
14.6287	0.0346942			14.6283	0.0554274			14.6283	0.252929
14.6354	0.0344808			14.635	0.0547568			14.635	0.253522
14.6421	0.0342745			14.6418	0.0540696			14.6418	0.254073
14.6489	0.0340749			14.6485	0.0533611			14.6485	0.254594
14.6556	0.0338685			14.6552	0.0526595			14.6552	0.255097
14.6623	0.0336601			14.662	0.0519667			14.662	0.255587
14.6691	0.033469			14.6687	0.0512801			14.6687	0.256074
14.6758	0.033286			14.6755	0.0506011			14.6754	0.256569
14.6825	0.0330919			14.6822	0.0499329			14.6822	0.25708
14.6893	0.0328726			14.6889	0.0492757			14.6889	0.257615
14.696	0.0326425			14.6957	0.0486317			14.6956	0.258183
14.7027	0.0324248			14.7024	0.0480038			14.7024	0.258788
14.7095	0.0322099			14.7091	0.0473812			14.7091	0.259451
14.7162	0.0319856			14.7159	0.046758			14.7158	0.260189
14.7229	0.0317647			14.7226	0.0461447			14.7226	0.260982
14.7297	0.0315559			14.7293	0.0455416			14.7293	0.261822
14.7364	0.0313519			14.7361	0.0449468			14.736	0.262736
14.7431	0.0311485			14.7428	0.0443639			14.7428	0.263727
14.7499	0.0309472			14.7495	0.0437926			14.7495	0.264806
14.7566	0.0307457			14.7563	0.0432319			14.7562	0.265995
14.7633	0.0305488			14.763	0.0426793			14.763	0.267309
14.7701	0.0303643			14.7697	0.0421312			14.7697	0.268762
14.7768	0.0301794			14.7765	0.0415906			14.7765	0.270357
14.7836	0.0299905			14.7832	0.0410606			14.7832	0.272095
14.7903	0.0298068			14.7899	0.0405411			14.7899	0.274
14.797	0.0296238			14.7967	0.0400338			14.7967	0.276079
14.8038	0.0294427			14.8034	0.0395354			14.8034	0.278341
14.8105	0.0292696			14.8101	0.0390496			14.8101	0.280821
14.8172	0.0290964			14.8169	0.0385769			14.8169	0.28354
14.824	0.0289174			14.8236	0.0381111			14.8236	0.286449
14.8307	0.028739			14.8303	0.0376517			14.8303	0.289529
14.8374	0.0285599			14.8371	0.0371975			14.8371	0.292826
14.8442	0.0283814			14.8438	0.0367492			14.8438	0.296351
14.8509	0.0282095			14.8505	0.036308			14.8505	0.300108
14.8576	0.0280428			14.8573	0.0358761			14.8573	0.304133
14.8644	0.0278829			14.864	0.0354551			14.864	0.308436
14.8711	0.0277327			14.8707	0.0350545			14.8707	0.31297
14.8778	0.0275875			14.8775	0.0346747			14.8775	0.317717
14.8846	0.027438			14.8842	0.0342894			14.8842	0.322713
14.8913	0.0272841			14.8909	0.0338979			14.8909	0.327979
14.898	0.0271325			14.8977	0.0335142			14.8977	0.33351
14.9048	0.026984			14.9044	0.0331381			14.9044	0.339311
14.9115	0.0268437			14.9111	0.0327698			14.9111	0.345388
14.9182	0.0267164			14.9179	0.0324103			14.9179	0.351739
14.925	0.026587			14.9246	0.0320582			14.9246	0.358365
14.9317	0.0264439			14.9313	0.0317078			14.9313	0.365294
14.9384	0.0262965			14.9381	0.0313626			14.9381	0.372445
14.9452	0.0261536			14.9448	0.0310243			14.9448	0.379747
14.9519	0.0260158			14.9515	0.0306938			14.9515	0.387271
14.9586	0.0258789			14.9583	0.0303727			14.9583	0.395039
14.9654	0.0257419			14.965	0.030059			14.965	0.403047
14.9721	0.0256047			14.9717	0.0297497			14.9717	0.411282
14.9788	0.0254696			14.9785	0.0294444			14.9785	0.419732
14.9856	0.02534			14.9852	0.0291438			14.9852	0.42838
14.9923	0.0252133			14.9919	0.0288568			14.9919	0.437221
14.999	0.0250899			14.9987	0.0285793			14.9987	0.446252
15.0058	0.0249676			15.0054	0.0283018			15.0054	0.455465
15.0125	0.0248438			15.0121	0.028028			15.0121	0.464866
15.0192	0.0247225			15.0189	0.0277603			15.0189	0.474429
15.026	0.0246082			15.0256	0.0275025			15.0256	0.484101
15.0327	0.0245007			15.0323	0.0272607			15.0323	0.493875
15.0394	0.0243968			15.0391	0.0270266			15.0391	0.503751
15.0462	0.0242925			15.0458	0.0267984			15.0458	0.513715
15.0529	0.0241862			15.0525	0.026582			15.0525	0.523791
15.0596	0.0240731			15.0593	0.0263604			15.0593	0.533977
15.0664	0.0239527			15.066	0.026129			15.066	0.544234
15.0731	0.0238322			15.0727	0.0259051			15.0727	0.554554
15.0798	0.0237171			15.0795	0.0256883			15.0795	0.564937
15.0866	0.023608			15.0862	0.0254683			15.0862	0.57538
15.0933	0.023504			15.0929	0.0252497			15.0929	0.585865
15.1	0.0234018			15.0997	0.0250375			15.0997	0.59641
15.1068	0.0232931			15.1064	0.02483			15.1064	0.606986
15.1135	0.0231813			15.1131	0.0246269			15.1131	0.617551
15.1202	0.0230747			15.1199	0.0244285			15.1199	0.628112
15.127	0.0229716			15.1266	0.0242334			15.1266	0.638645
15.1337	0.0228654			15.1334	0.0240455			15.1333	0.649143
15.1404	0.0227551			15.1401	0.0238652			15.1401	0.659608
15.1472	0.0226494			15.1468	0.0236885			15.1468	0.67004
15.1539	0.0225534			15.1536	0.023512			15.1535	0.680441
15.1606	0.0224664			15.1603	0.0233372			15.1603	0.690807
15.1674	0.0223838			15.167	0.0231709			15.167	0.70114
15.1741	0.0223074			15.1738	0.0230055			15.1737	0.711438
15.1808	0.0222512			15.1805	0.0228366			15.1805	0.721693
15.1876	0.022209			15.1872	0.0226757			15.1872	0.731926
15.1943	0.0221629			15.194	0.0225289			15.1939	0.742139
15.201	0.0220937			15.2007	0.0223941			15.2007	0.752294
15.2078	0.0219929			15.2074	0.022254			15.2074	0.762363
15.2145	0.0218825			15.2142	0.0221037			15.2141	0.772355
15.2212	0.0217766			15.2209	0.0219603			15.2209	0.782251
15.228	0.0216753			15.2276	0.0218185			15.2276	0.792024
15.2347	0.0215777			15.2344	0.0216704			15.2344	0.801672
15.2415	0.0214718			15.2411	0.0215211			15.2411	0.811189
15.2482	0.0213548			15.2478	0.0213734			15.2478	0.820564
15.2549	0.0212418			15.2546	0.0212287			15.2546	0.829803
15.2617	0.0211336			15.2613	0.0210881			15.2613	0.838911
15.2684	0.0210278			15.268	0.0209525			15.268	0.847887
15.2751	0.0209259			15.2748	0.0208252			15.2748	0.856705
[truncated: 1,448 more rows]

## Sheet: Fig. 4D Left
Apa-20S CP WT BLI curves
	100 nM		50 nM		25 nM		12.5 nM		6.25 nM		3.125 nM		1.56 nM
Adjusted time	Raw	fit	Raw	fit	Raw	fit	Raw	fit	Raw	fit	Raw	fit	Raw	fit
0	-0.006	0	-0.009	0	-0.005	0	-0.003	0	-0.006	0	-0.003	0	-0.004	0
0.2	-0.002	0	-0.011	0	-0.003	0.002	-0.012	0.001	-0.012	0.001	-0.005	0	0	0
0.4	0	0	-0.013	0	-0.007	0.005	-0.01	0.002	-0.016	0.001	-0.01	0.001	-0.01	0
0.6	0.011	0	-0.001	0	-0.001	0.007	-0.007	0.004	-0.012	0.002	-0.008	0.001	-0.012	0
0.8	0.017	0	0.003	0	0.002	0.009	-0.005	0.005	-0.015	0.002	-0.005	0.001	-0.009	0
1	0.022	0	0.008	0	-0.002	0.012	-0.01	0.006	-0.009	0.003	-0.011	0.001	-0.009	0
1.2	0.031	0	0.013	0	0.005	0.014	-0.011	0.007	-0.014	0.003	-0.011	0.002	-0.007	0.001
1.4	0.036	0	0.01	0	0.007	0.016	-0.002	0.009	-0.01	0.004	-0.01	0.002	-0.006	0.001
1.6	0.043	0	0.019	0	0.009	0.018	-0.001	0.01	-0.008	0.004	-0.008	0.002	-0.01	0.001
1.8	0.06	0	0.022	0	0.005	0.021	0.002	0.011	-0.012	0.005	-0.008	0.002	-0.005	0.001
2	0.06	0	0.029	0	0.011	0.023	0.001	0.012	-0.008	0.005	-0.003	0.003	-0.007	0.001
2.2	0.075	0	0.039	0	0.02	0.025	0	0.013	-0.001	0.006	0.003	0.003	0.001	0.001
2.4	0.074	0	0.037	0	0.01	0.027	0.003	0.015	-0.013	0.006	-0.01	0.003	-0.01	0.001
2.6	0.09	0	0.042	0	0.017	0.029	0.009	0.016	-0.009	0.007	-0.001	0.003	0.001	0.001
2.8	0.092	0	0.047	0	0.022	0.032	0.01	0.017	-0.01	0.007	-0.007	0.004	-0.001	0.001
3	0.094	0	0.045	0	0.021	0.034	0.002	0.018	-0.013	0.008	-0.013	0.004	-0.014	0.001
3.2	0.106	0	0.056	0	0.024	0.036	0.004	0.019	-0.006	0.008	-0.005	0.004	-0.006	0.002
3.4	0.11	0	0.053	0	0.021	0.038	0.004	0.02	-0.008	0.009	-0.009	0.004	-0.012	0.002
3.6	0.121	0	0.066	0	0.027	0.04	0.009	0.022	-0.009	0.009	-0.01	0.005	-0.009	0.002
3.8	0.13	0	0.064	0	0.024	0.042	0.004	0.023	-0.008	0.01	-0.005	0.005	-0.01	0.002
4	0.135	0	0.071	0	0.028	0.044	0.006	0.024	-0.006	0.01	-0.005	0.005	-0.007	0.002
4.2	0.131	0	0.074	0	0.03	0.046	0.007	0.025	-0.013	0.011	-0.005	0.005	-0.01	0.002
4.4	0.149	0	0.08	0	0.034	0.048	0.011	0.026	0.001	0.011	-0.002	0.006	-0.007	0.002
4.6	0.153	0	0.081	0	0.035	0.05	0.005	0.027	-0.008	0.012	-0.012	0.006	-0.009	0.002
4.8	0.155	0	0.089	0	0.037	0.052	0.011	0.028	-0.008	0.012	-0.007	0.006	-0.009	0.002
5	0.161	0	0.093	0	0.043	0.054	0.02	0.029	-0.004	0.013	-0.004	0.006	-0.006	0.002
5.2	0.173	0	0.092	0	0.041	0.056	0.009	0.031	-0.004	0.013	-0.005	0.007	-0.001	0.003
5.4	0.171	0	0.099	0	0.041	0.058	0.017	0.032	-0.01	0.014	-0.005	0.007	-0.006	0.003
5.6	0.179	0	0.107	0	0.05	0.06	0.023	0.033	0.004	0.014	-0.002	0.007	-0.004	0.003
5.8	0.182	0	0.106	0	0.047	0.062	0.021	0.034	-0.002	0.015	-0.004	0.007	-0.009	0.003
6	0.191	0	0.113	0	0.05	0.064	0.022	0.035	-0.002	0.015	-0.006	0.008	-0.002	0.003
6.2	0.187	0	0.105	0	0.043	0.066	0.012	0.036	-0.01	0.016	-0.009	0.008	-0.011	0.003
6.4	0.196	0	0.117	0	0.052	0.068	0.015	0.037	-0.007	0.016	-0.009	0.008	-0.008	0.003
6.6	0.202	0	0.126	0	0.057	0.07	0.021	0.038	0.006	0.017	-0.007	0.008	-0.004	0.003
6.8	0.206	0	0.118	0	0.054	0.072	0.02	0.039	-0.005	0.017	-0.004	0.009	-0.009	0.003
7	0.209	0	0.131	0	0.056	0.074	0.025	0.041	-0.01	0.018	-0.007	0.009	-0.01	0.003
7.2	0.215	0	0.138	0	0.064	0.075	0.023	0.042	0.005	0.018	-0.004	0.009	-0.004	0.004
7.4	0.225	0	0.136	0	0.069	0.077	0.027	0.043	0.001	0.019	0.003	0.009	-0.005	0.004
7.6	0.223	0	0.138	0	0.069	0.079	0.024	0.044	0.003	0.019	-0.002	0.01	-0.005	0.004
7.8	0.23	0	0.147	0	0.071	0.081	0.028	0.045	0.005	0.02	-0.005	0.01	-0.006	0.004
8	0.231	0	0.147	0	0.071	0.083	0.028	0.046	0.003	0.02	-0.003	0.01	-0.003	0.004
8.2	0.241	0	0.155	0	0.079	0.084	0.037	0.047	0.003	0.021	0	0.01	-0.001	0.004
8.4	0.238	0	0.159	0	0.072	0.086	0.035	0.048	0.002	0.021	0.002	0.011	-0.003	0.004
8.6	0.242	0	0.159	0	0.081	0.088	0.033	0.049	0.004	0.021	-0.002	0.011	0.001	0.004
8.8	0.246	0	0.163	0	0.079	0.09	0.039	0.05	0.004	0.022	0	0.011	-0.002	0.004
9	0.246	0	0.168	0	0.083	0.092	0.033	0.051	-0.002	0.022	-0.002	0.011	-0.004	0.004
9.2	0.248	0	0.17	0	0.079	0.093	0.027	0.052	-0.002	0.023	-0.004	0.012	-0.006	0.005
9.4	0.251	0	0.172	0	0.089	0.095	0.034	0.053	0.012	0.023	-0.006	0.012	-0.004	0.005
9.6	0.255	0	0.179	0	0.087	0.097	0.038	0.054	0.005	0.024	0.004	0.012	-0.001	0.005
9.8	0.259	0	0.179	0	0.084	0.098	0.042	0.055	0.008	0.024	-0.001	0.012	-0.004	0.005
10	0.26	0	0.18	0	0.089	0.1	0.038	0.056	0.003	0.025	-0.002	0.013	-0.007	0.005
10.2	0.265	0	0.184	0	0.089	0.102	0.039	0.057	0.003	0.025	0.001	0.013	-0.01	0.005
10.4	0.264	0	0.186	0	0.09	0.103	0.041	0.058	0.004	0.026	-0.002	0.013	-0.006	0.005
10.6	0.267	0	0.189	0	0.096	0.105	0.045	0.059	0.012	0.026	-0.002	0.013	-0.002	0.005
10.8	0.276	0	0.189	0	0.096	0.107	0.049	0.06	0.013	0.027	0.003	0.014	-0.002	0.005
11	0.273	0	0.198	0	0.1	0.108	0.046	0.061	0.009	0.027	0.002	0.014	-0.003	0.005
11.2	0.27	0	0.199	0	0.099	0.11	0.046	0.062	0.008	0.028	0.002	0.014	-0.003	0.005
11.4	0.273	0	0.198	0	0.099	0.112	0.043	0.063	0.004	0.028	-0.001	0.014	-0.004	0.006
11.6	0.277	0	0.202	0	0.105	0.113	0.047	0.064	0.007	0.029	0.004	0.014	-0.004	0.006
11.8	0.278	0	0.205	0	0.106	0.115	0.045	0.065	0.011	0.029	0.001	0.015	-0.002	0.006
12	0.278	0	0.208	0	0.109	0.116	0.048	0.066	0.009	0.03	-0.004	0.015	-0.003	0.006
12.2	0.281	0	0.21	0	0.108	0.118	0.048	0.067	0.011	0.03	-0.001	0.015	-0.004	0.006
12.4	0.287	0	0.217	0	0.117	0.12	0.05	0.068	0.016	0.031	0.003	0.015	0.001	0.006
12.6	0.292	0	0.212	0	0.112	0.121	0.05	0.069	0.017	0.031	0	0.016	-0.003	0.006
12.8	0.285	0	0.218	0	0.114	0.123	0.051	0.07	0.014	0.031	0.004	0.016	-0.002	0.006
13	0.295	0	0.229	0	0.127	0.124	0.062	0.071	0.019	0.032	0.009	0.016	-0.001	0.006
13.2	0.288	0	0.226	0	0.114	0.126	0.053	0.072	0.013	0.032	0.001	0.016	-0.006	0.006
13.4	0.294	0	0.222	0	0.118	0.127	0.056	0.073	0.014	0.033	0.002	0.017	-0.005	0.007
13.6	0.297	0	0.23	0	0.123	0.129	0.06	0.074	0.018	0.033	0.004	0.017	-0.001	0.007
13.8	0.303	0	0.236	0	0.133	0.13	0.064	0.075	0.021	0.034	0.009	0.017	0.004	0.007
14	0.293	0	0.227	0	0.125	0.132	0.057	0.076	0.012	0.034	0.002	0.017	-0.006	0.007
14.2	0.298	0	0.232	0	0.131	0.133	0.059	0.077	0.02	0.035	0.006	0.018	-0.007	0.007
14.4	0.293	0	0.233	0	0.128	0.135	0.062	0.078	0.016	0.035	0.004	0.018	-0.003	0.007
14.6	0.296	0	0.236	0	0.133	0.136	0.062	0.079	0.019	0.036	0.007	0.018	-0.001	0.007
14.8	0.309	0	0.244	0	0.135	0.137	0.065	0.08	0.02	0.036	0.006	0.018	-0.003	0.007
15	0.305	0	0.243	0	0.137	0.139	0.068	0.081	0.02	0.037	0.006	0.019	-0.004	0.007
15.2	0.307	0	0.243	0	0.14	0.14	0.072	0.082	0.024	0.037	0.009	0.019	-0.002	0.007
15.4	0.31	0	0.255	0	0.146	0.142	0.073	0.083	0.029	0.038	0.012	0.019	0	0.007
15.6	0.304	0	0.249	0	0.143	0.143	0.061	0.084	0.02	0.038	0.005	0.019	-0.004	0.008
15.8	0.306	0	0.247	0	0.142	0.145	0.067	0.085	0.016	0.038	-0.001	0.02	-0.006	0.008
16	0.308	0	0.247	0	0.144	0.146	0.066	0.085	0.017	0.039	0	0.02	-0.003	0.008
16.2	0.308	0	0.254	0	0.152	0.147	0.07	0.086	0.021	0.039	0.005	0.02	-0.003	0.008
16.4	0.314	0	0.257	0	0.145	0.149	0.074	0.087	0.023	0.04	0.002	0.02	-0.002	0.008
16.6	0.317	0	0.26	0	0.154	0.15	0.074	0.088	0.027	0.04	0.013	0.021	0.003	0.008
16.8	0.317	0	0.259	0	0.151	0.151	0.075	0.089	0.021	0.041	0.009	0.021	0.002	0.008
17	0.313	0	0.259	0	0.152	0.153	0.076	0.09	0.022	0.041	0.007	0.021	-0.002	0.008
17.2	0.311	0	0.261	0	0.149	0.154	0.074	0.091	0.022	0.042	0.005	0.021	-0.001	0.008
17.4	0.314	0	0.259	0	0.154	0.155	0.078	0.092	0.026	0.042	0.004	0.021	-0.003	0.008
17.6	0.317	0	0.267	0	0.16	0.157	0.08	0.093	0.026	0.043	0.01	0.022	-0.001	0.009
17.8	0.312	0	0.263	0	0.159	0.158	0.079	0.094	0.023	0.043	0.006	0.022	-0.003	0.009
18	0.317	0	0.268	0	0.163	0.159	0.079	0.094	0.025	0.043	0.008	0.022	0.003	0.009
18.2	0.319	0	0.27	0	0.155	0.161	0.072	0.095	0.021	0.044	0.004	0.022	-0.005	0.009
18.4	0.321	0	0.27	0	0.167	0.162	0.085	0.096	0.031	0.044	0.014	0.023	0.003	0.009
18.6	0.321	0	0.275	0	0.162	0.163	0.08	0.097	0.027	0.045	0.01	0.023	0.005	0.009
18.8	0.322	0	0.271	0	0.162	0.164	0.079	0.098	0.029	0.045	0.006	0.023	0	0.009
19	0.32	0	0.275	0	0.162	0.166	0.082	0.099	0.028	0.046	0.006	0.023	-0.004	0.009
19.2	0.317	0	0.27	0	0.162	0.167	0.086	0.1	0.025	0.046	0.006	0.024	-0.006	0.009
19.4	0.32	0	0.279	0	0.17	0.168	0.086	0.101	0.03	0.047	0.014	0.024	0	0.009
19.6	0.319	0	0.277	0	0.172	0.169	0.086	0.101	0.028	0.047	0.011	0.024	-0.002	0.009
19.8	0.334	0	0.282	0	0.178	0.171	0.09	0.102	0.032	0.047	0.012	0.024	-0.002	0.01
20	0.325	0	0.281	0	0.178	0.172	0.089	0.103	0.032	0.048	0.008	0.025	-0.001	0.01
20.2	0.327	0	0.283	0	0.179	0.173	0.084	0.104	0.037	0.048	0.015	0.025	0	0.01
20.4	0.334	0	0.286	0	0.182	0.174	0.101	0.105	0.033	0.049	0.016	0.025	0.004	0.01
20.6	0.333	0	0.286	0	0.18	0.175	0.095	0.106	0.035	0.049	0.013	0.025	0.008	0.01
20.8	0.327	0	0.294	0	0.184	0.177	0.101	0.107	0.032	0.05	0.013	0.026	0.004	0.01
21	0.331	0	0.292	0	0.186	0.178	0.095	0.107	0.037	0.05	0.015	0.026	0.005	0.01
21.2	0.328	0	0.292	0	0.182	0.179	0.093	0.108	0.036	0.051	0.013	0.026	-0.002	0.01
21.4	0.332	0	0.29	0	0.183	0.18	0.101	0.109	0.038	0.051	0.015	0.026	0.002	0.01
21.6	0.329	0	0.289	0	0.184	0.181	0.096	0.11	0.03	0.051	0.012	0.026	-0.002	0.01
21.8	0.328	0	0.292	0	0.187	0.182	0.099	0.111	0.034	0.052	0.01	0.027	0	0.011
22	0.332	0	0.293	0	0.184	0.184	0.1	0.112	0.034	0.052	0.016	0.027	-0.003	0.011
22.2	0.338	0	0.294	0	0.195	0.185	0.109	0.112	0.04	0.053	0.015	0.027	0.006	0.011
22.4	0.325	0	0.289	0	0.186	0.186	0.095	0.113	0.033	0.053	0.01	0.027	-0.001	0.011
22.6	0.335	0	0.298	0	0.197	0.187	0.11	0.114	0.043	0.054	0.02	0.028	0.008	0.011
22.8	0.336	0	0.297	0	0.191	0.188	0.105	0.115	0.038	0.054	0.018	0.028	0.002	0.011
23	0.33	0	0.292	0	0.189	0.189	0.104	0.116	0.036	0.054	0.013	0.028	-0.001	0.011
23.2	0.335	0	0.298	0	0.192	0.19	0.108	0.116	0.036	0.055	0.016	0.028	0.002	0.011
23.4	0.335	0	0.302	0	0.196	0.191	0.106	0.117	0.038	0.055	0.014	0.029	0.003	0.011
23.6	0.335	0	0.298	0	0.201	0.192	0.103	0.118	0.041	0.056	0.012	0.029	-0.001	0.011
23.8	0.335	0	0.302	0	0.197	0.193	0.109	0.119	0.035	0.056	0.015	0.029	-0.003	0.011
24	0.339	0	0.301	0	0.204	0.195	0.115	0.12	0.041	0.057	0.018	0.029	0.001	0.012
24.2	0.339	0	0.303	0	0.205	0.196	0.114	0.12	0.044	0.057	0.014	0.029	0.003	0.012
24.4	0.341	0	0.307	0	0.207	0.197	0.109	0.121	0.04	0.057	0.016	0.03	0.008	0.012
24.6	0.343	0	0.311	0	0.208	0.198	0.113	0.122	0.046	0.058	0.023	0.03	0.003	0.012
24.8	0.344	0	0.305	0	0.209	0.199	0.114	0.123	0.043	0.058	0.016	0.03	0.005	0.012
25	0.341	0	0.306	0	0.206	0.2	0.11	0.124	0.047	0.059	0.015	0.03	0.002	0.012
25.2	0.339	0	0.303	0	0.202	0.201	0.11	0.124	0.041	0.059	0.015	0.031	-0.001	0.012
25.4	0.345	0	0.308	0	0.217	0.202	0.118	0.125	0.048	0.06	0.029	0.031	0.008	0.012
25.6	0.341	0	0.303	0	0.208	0.203	0.116	0.126	0.044	0.06	0.015	0.031	0.005	0.012
25.8	0.337	0	0.304	0	0.212	0.204	0.118	0.127	0.042	0.06	0.015	0.031	0.001	0.012
26	0.342	0	0.311	0	0.211	0.205	0.117	0.127	0.043	0.061	0.017	0.032	0.006	0.012
26.2	0.345	0	0.313	0	0.211	0.206	0.12	0.128	0.043	0.061	0.021	0.032	0.005	0.013
26.4	0.348	0	0.319	0	0.221	0.207	0.128	0.129	0.05	0.062	0.027	0.032	0.01	0.013
26.6	0.345	0	0.31	0	0.216	0.208	0.116	0.13	0.043	0.062	0.022	0.032	0.005	0.013
26.8	0.345	0	0.31	0	0.219	0.209	0.121	0.131	0.043	0.063	0.018	0.032	0.003	0.013
27	0.344	0	0.304	0	0.214	0.21	0.12	0.131	0.042	0.063	0.017	0.033	-0.002	0.013
27.2	0.345	0	0.315	0	0.219	0.211	0.123	0.132	0.049	0.063	0.025	0.033	0.003	0.013
27.4	0.348	0	0.315	0	0.225	0.212	0.129	0.133	0.044	0.064	0.018	0.033	0.009	0.013
27.6	0.346	0	0.319	0	0.215	0.213	0.126	0.134	0.049	0.064	0.018	0.033	0.002	0.013
27.8	0.338	0	0.311	0	0.216	0.214	0.122	0.134	0.047	0.065	0.019	0.034	0	0.013
28	0.344	0	0.313	0	0.221	0.214	0.127	0.135	0.042	0.065	0.019	0.034	0.004	0.013
28.2	0.35	0	0.317	0	0.227	0.215	0.13	0.136	0.044	0.066	0.024	0.034	0.006	0.014
28.4	0.347	0	0.319	0	0.224	0.216	0.129	0.137	0.051	0.066	0.023	0.034	0.009	0.014
28.6	0.352	0	0.32	0	0.23	0.217	0.13	0.137	0.053	0.066	0.019	0.035	0.007	0.014
28.8	0.35	0	0.32	0	0.226	0.218	0.132	0.138	0.052	0.067	0.021	0.035	0	0.014
29	0.352	0	0.324	0	0.231	0.219	0.133	0.139	0.055	0.067	0.023	0.035	0.011	0.014
29.2	0.346	0	0.317	0	0.227	0.22	0.133	0.139	0.05	0.068	0.023	0.035	0.004	0.014
29.4	0.353	0	0.319	0	0.237	0.221	0.136	0.14	0.057	0.068	0.024	0.035	0.005	0.014
29.6	0.354	0	0.327	0	0.237	0.222	0.135	0.141	0.057	0.068	0.027	0.036	0.011	0.014
29.8	0.35	0	0.323	0	0.231	0.223	0.129	0.142	0.05	0.069	0.019	0.036	0.004	0.014
30	0.354	0	0.326	0	0.233	0.224	0.132	0.142	0.058	0.069	0.024	0.036	0.007	0.014
30.2	0.355	0	0.325	0	0.237	0.224	0.133	0.143	0.061	0.07	0.027	0.036	0.008	0.014
30.4	0.348	0	0.323	0	0.235	0.225	0.138	0.144	0.061	0.07	0.022	0.037	0.005	0.015
30.6	0.348	0	0.319	0	0.233	0.226	0.135	0.145	0.053	0.07	0.02	0.037	0.002	0.015
30.8	0.354	0	0.335	0	0.241	0.227	0.142	0.145	0.061	0.071	0.026	0.037	0.006	0.015
31	0.357	0	0.328	0	0.245	0.228	0.143	0.146	0.061	0.071	0.027	0.037	0.011	0.015
31.2	0.35	0	0.328	0	0.235	0.229	0.14	0.147	0.057	0.072	0.023	0.037	0.003	0.015
31.4	0.352	0	0.331	0	0.241	0.23	0.144	0.147	0.062	0.072	0.02	0.038	0.001	0.015
31.6	0.36	0	0.33	0	0.244	0.23	0.146	0.148	0.063	0.073	0.025	0.038	0.013	0.015
31.8	0.359	0	0.329	0	0.239	0.231	0.146	0.149	0.058	0.073	0.023	0.038	0.009	0.015
32	0.353	0	0.333	0	0.248	0.232	0.144	0.149	0.059	0.073	0.034	0.038	0.01	0.015
32.2	0.354	0	0.329	0	0.24	0.233	0.146	0.15	0.061	0.074	0.024	0.039	0.006	0.015
32.4	0.355	0	0.329	0	0.24	0.234	0.142	0.151	0.058	0.074	0.027	0.039	0.004	0.015
32.6	0.355	0	0.331	0	0.244	0.235	0.149	0.151	0.06	0.075	0.027	0.039	0.012	0.016
32.8	0.357	0	0.332	0	0.245	0.235	0.144	0.152	0.061	0.075	0.027	0.039	0.004	0.016
33	0.354	0	0.329	0	0.246	0.236	0.15	0.153	0.061	0.075	0.024	0.04	0.003	0.016
33.2	0.354	0	0.333	0	0.249	0.237	0.149	0.154	0.063	0.076	0.028	0.04	0.003	0.016
33.4	0.359	0	0.33	0	0.251	0.238	0.144	0.154	0.066	0.076	0.029	0.04	0.003	0.016
33.6	0.36	0	0.339	0	0.251	0.238	0.156	0.155	0.065	0.077	0.028	0.04	0.009	0.016
33.8	0.355	0	0.331	0	0.248	0.239	0.151	0.156	0.065	0.077	0.024	0.04	0.008	0.016
34	0.359	0	0.335	0	0.249	0.24	0.147	0.156	0.067	0.077	0.026	0.041	0.007	0.016
34.2	0.362	0	0.339	0	0.252	0.241	0.157	0.157	0.062	0.078	0.027	0.041	0.009	0.016
34.4	0.36	0	0.334	0	0.249	0.242	0.149	0.158	0.065	0.078	0.028	0.041	0.009	0.016
34.6	0.362	0	0.334	0	0.256	0.242	0.162	0.158	0.068	0.079	0.031	0.041	0.007	0.016
34.8	0.357	0	0.332	0	0.249	0.243	0.152	0.159	0.062	0.079	0.023	0.042	0.004	0.017
35	0.356	0	0.335	0	0.253	0.244	0.162	0.16	0.067	0.079	0.03	0.042	0.008	0.017
35.2	0.358	0	0.343	0	0.257	0.245	0.159	0.16	0.069	0.08	0.033	0.042	0.015	0.017
35.4	0.36	0	0.336	0	0.254	0.245	0.157	0.161	0.065	0.08	0.032	0.042	0.008	0.017
35.6	0.36	0	0.336	0	0.254	0.246	0.156	0.162	0.062	0.081	0.027	0.042	0.005	0.017
35.8	0.356	0	0.332	0	0.256	0.247	0.157	0.162	0.061	0.081	0.027	0.043	0.003	0.017
36	0.358	0	0.34	0	0.257	0.248	0.158	0.163	0.063	0.081	0.03	0.043	0.005	0.017
36.2	0.356	0	0.34	0	0.259	0.248	0.163	0.164	0.067	0.082	0.026	0.043	0.002	0.017
36.4	0.359	0	0.341	0	0.256	0.249	0.165	0.164	0.07	0.082	0.031	0.043	0.008	0.017
36.6	0.361	0	0.344	0	0.262	0.25	0.167	0.165	0.07	0.083	0.033	0.044	0.014	0.017
36.8	0.363	0	0.343	0	0.26	0.25	0.162	0.165	0.065	0.083	0.03	0.044	0.009	0.017
37	0.361	0	0.337	0	0.256	0.251	0.16	0.166	0.066	0.083	0.025	0.044	0.003	0.018
37.2	0.361	0	0.339	0	0.26	0.252	0.166	0.167	0.068	0.084	0.032	0.044	0.006	0.018
37.4	0.357	0	0.345	0	0.262	0.253	0.163	0.167	0.072	0.084	0.031	0.044	0.008	0.018
37.6	0.367	0	0.35	0	0.27	0.253	0.174	0.168	0.08	0.084	0.035	0.045	0.012	0.018
37.8	0.363	0	0.348	0	0.269	0.254	0.171	0.169	0.077	0.085	0.035	0.045	0.009	0.018
38	0.362	0	0.344	0	0.267	0.255	0.167	0.169	0.074	0.085	0.033	0.045	0.009	0.018
38.2	0.365	0	0.347	0	0.266	0.255	0.168	0.17	0.074	0.086	0.033	0.045	0.013	0.018
38.4	0.363	0	0.341	0	0.262	0.256	0.168	0.17	0.069	0.086	0.031	0.046	0.009	0.018
38.6	0.361	0	0.341	0	0.263	0.257	0.166	0.171	0.071	0.086	0.031	0.046	0.004	0.018
38.8	0.365	0	0.348	0	0.268	0.257	0.172	0.172	0.074	0.087	0.029	0.046	0.009	0.018
39	0.364	0	0.34	0	0.263	0.258	0.167	0.172	0.068	0.087	0.025	0.046	0.004	0.018
39.2	0.365	0	0.344	0	0.266	0.259	0.172	0.173	0.075	0.088	0.031	0.046	0.011	0.019
39.4	0.361	0	0.346	0	0.266	0.259	0.171	0.174	0.072	0.088	0.033	0.047	0.004	0.019
39.6	0.363	0	0.343	0	0.268	0.26	0.17	0.174	0.079	0.088	0.033	0.047	0.008	0.019
39.8	0.365	0	0.345	0	0.264	0.261	0.166	0.175	0.074	0.089	0.033	0.047	0.01	0.019
40	0.368	0	0.348	0	0.267	0.261	0.175	0.175	0.079	0.089	0.032	0.047	0.007	0.019
40.2	0.371	0	0.344	0	0.266	0.262	0.178	0.176	0.078	0.089	0.037	0.047	0.013	0.019
40.4	0.369	0	0.348	0	0.277	0.262	0.182	0.177	0.082	0.09	0.042	0.048	0.013	0.019
40.6	0.373	0	0.354	0	0.279	0.263	0.189	0.177	0.085	0.09	0.041	0.048	0.013	0.019
40.8	0.369	0	0.349	0	0.273	0.264	0.183	0.178	0.079	0.091	0.039	0.048	0.015	0.019
41	0.366	0	0.349	0	0.274	0.264	0.183	0.178	0.079	0.091	0.034	0.048	0.007	0.019
41.2	0.361	0	0.346	0	0.269	0.265	0.177	0.179	0.079	0.091	0.031	0.049	0.01	0.019
41.4	0.37	0	0.353	0	0.279	0.266	0.183	0.18	0.082	0.092	0.04	0.049	0.012	0.02
41.6	0.366	0	0.35	0	0.276	0.266	0.181	0.18	0.076	0.092	0.03	0.049	0.007	0.02
41.8	0.364	0	0.349	0	0.275	0.267	0.182	0.181	0.082	0.092	0.033	0.049	0.014	0.02
42	0.37	0	0.351	0	0.275	0.267	0.182	0.181	0.087	0.093	0.036	0.049	0.015	0.02
42.2	0.369	0	0.353	0	0.282	0.268	0.19	0.182	0.086	0.093	0.038	0.05	0.007	0.02
42.4	0.368	0	0.351	0	0.274	0.269	0.185	0.183	0.083	0.094	0.039	0.05	0.01	0.02
42.6	0.366	0	0.349	0	0.282	0.269	0.188	0.183	0.081	0.094	0.033	0.05	0.01	0.02
42.8	0.363	0	0.347	0	0.277	0.27	0.183	0.184	0.079	0.094	0.034	0.05	0.006	0.02
43	0.362	0	0.353	0	0.278	0.27	0.181	0.184	0.081	0.095	0.035	0.051	0.008	0.02
43.2	0.366	0	0.347	0	0.281	0.271	0.186	0.185	0.083	0.095	0.037	0.051	0.013	0.02
43.4	0.37	0	0.355	0	0.283	0.271	0.191	0.185	0.083	0.095	0.044	0.051	0.011	0.02
43.6	0.363	0	0.353	0	0.277	0.272	0.189	0.186	0.081	0.096	0.039	0.051	0.009	0.021
43.8	0.366	0	0.353	0	0.285	0.273	0.192	0.187	0.089	0.096	0.043	0.051	0.012	0.021
44	0.366	0	0.349	0	0.284	0.273	0.189	0.187	0.088	0.097	0.044	0.052	0.015	0.021
44.2	0.368	0	0.353	0	0.28	0.274	0.186	0.188	0.082	0.097	0.038	0.052	0.013	0.021
44.4	0.371	0	0.357	0	0.284	0.274	0.188	0.188	0.083	0.097	0.037	0.052	0.014	0.021
44.6	0.374	0	0.356	0	0.291	0.275	0.196	0.189	0.09	0.098	0.043	0.052	0.014	0.021
44.8	0.376	0	0.358	0	0.282	0.275	0.195	0.189	0.094	0.098	0.044	0.052	0.011	0.021
45	0.376	0	0.354	0	0.288	0.276	0.196	0.19	0.091	0.098	0.045	0.053	0.017	0.021
45.2	0.372	0	0.358	0	0.288	0.277	0.198	0.191	0.091	0.099	0.044	0.053	0.016	0.021
45.4	0.368	0	0.354	0	0.285	0.277	0.192	0.191	0.093	0.099	0.038	0.053	0.014	0.021
45.6	0.363	0	0.353	0	0.281	0.278	0.192	0.192	0.09	0.1	0.039	0.053	0.012	0.021
45.8	0.37	0	0.349	0	0.283	0.278	0.192	0.192	0.09	0.1	0.036	0.054	0.008	0.022
46	0.368	0	0.354	0	0.286	0.279	0.194	0.193	0.089	0.1	0.038	0.054	0.007	0.022
46.2	0.371	0	0.357	0	0.287	0.279	0.195	0.193	0.088	0.101	0.04	0.054	0.012	0.022
46.4	0.371	0	0.353	0	0.286	0.28	0.191	0.194	0.089	0.101	0.039	0.054	0.011	0.022
46.6	0.368	0	0.358	0	0.29	0.28	0.199	0.194	0.093	0.101	0.04	0.054	0.014	0.022
46.8	0.377	0	0.36	0	0.291	0.281	0.208	0.195	0.097	0.102	0.048	0.055	0.016	0.022
47	0.369	0	0.353	0	0.288	0.281	0.195	0.196	0.091	0.102	0.038	0.055	0.014	0.022
47.2	0.375	0	0.359	0	0.295	0.282	0.203	0.196	0.097	0.102	0.043	0.055	0.015	0.022
47.4	0.372	0	0.356	0	0.292	0.282	0.205	0.197	0.094	0.103	0.042	0.055	0.02	0.022
47.6	0.367	0	0.357	0	0.284	0.283	0.2	0.197	0.09	0.103	0.039	0.055	0.01	0.022
47.8	0.373	0	0.356	0	0.29	0.283	0.204	0.198	0.097	0.104	0.042	0.056	0.018	0.022
48	0.371	0	0.354	0	0.29	0.284	0.2	0.198	0.093	0.104	0.041	0.056	0.014	0.023
48.2	0.377	0	0.361	0	0.296	0.284	0.209	0.199	0.097	0.104	0.051	0.056	0.021	0.023
48.4	0.371	0	0.355	0	0.287	0.285	0.198	0.199	0.091	0.105	0.039	0.056	0.014	0.023
48.6	0.375	0	0.357	0	0.292	0.285	0.206	0.2	0.096	0.105	0.042	0.057	0.019	0.023
48.8	0.376	0	0.365	0	0.293	0.286	0.207	0.2	0.098	0.105	0.047	0.057	0.019	0.023
49	0.372	0	0.358	0	0.29	0.286	0.203	0.201	0.095	0.106	0.048	0.057	0.012	0.023
49.2	0.371	0	0.36	0	0.291	0.287	0.205	0.201	0.094	0.106	0.038	0.057	0.019	0.023
49.4	0.374	0	0.366	0	0.299	0.287	0.206	0.202	0.101	0.106	0.046	0.057	0.016	0.023
49.6	0.371	0	0.358	0	0.291	0.288	0.205	0.202	0.096	0.107	0.043	0.058	0.015	0.023
49.8	0.375	0	0.361	0	0.296	0.288	0.209	0.203	0.101	0.107	0.045	0.058	0.012	0.023
50	0.375	0	0.358	0	0.29	0.289	0.207	0.203	0.101	0.107	0.046	0.058	0.015	0.023
50.2	0.37	0	0.357	0	0.289	0.289	0.208	0.204	0.099	0.108	0.04	0.058	0.015	0.024
50.4	0.38	0	0.362	0	0.297	0.29	0.213	0.204	0.103	0.108	0.049	0.058	0.017	0.024
50.6	0.372	0	0.363	0	0.299	0.29	0.214	0.205	0.104	0.109	0.048	0.059	0.021	0.024
50.8	0.373	0	0.365	0	0.297	0.291	0.21	0.205	0.102	0.109	0.041	0.059	0.021	0.024
51	0.374	0	0.359	0	0.297	0.291	0.212	0.206	0.102	0.109	0.045	0.059	0.017	0.024
51.2	0.379	0	0.363	0	0.301	0.291	0.213	0.207	0.105	0.11	0.048	0.059	0.012	0.024
51.4	0.374	0	0.363	0	0.305	0.292	0.219	0.207	0.107	0.11	0.048	0.059	0.017	0.024
51.6	0.378	0	0.366	0	0.301	0.292	0.213	0.208	0.104	0.11	0.05	0.06	0.016	0.024
51.8	0.375	0	0.364	0	0.301	0.293	0.217	0.208	0.101	0.111	0.04	0.06	0.013	0.024
52	0.366	0	0.356	0	0.294	0.293	0.206	0.209	0.099	0.111	0.039	0.06	0.01	0.024
52.2	0.377	0	0.363	0	0.299	0.294	0.216	0.209	0.101	0.111	0.043	0.06	0.017	0.024
52.4	0.372	0	0.361	0	0.296	0.294	0.213	0.21	0.104	0.112	0.045	0.06	0.014	0.025
52.6	0.383	0	0.369	0	0.302	0.295	0.216	0.21	0.108	0.112	0.055	0.061	0.017	0.025
52.8	0.374	0	0.358	0	0.299	0.295	0.215	0.211	0.104	0.112	0.05	0.061	0.015	0.025
53	0.374	0	0.363	0	0.294	0.295	0.209	0.211	0.097	0.113	0.045	0.061	0.016	0.025
53.2	0.376	0	0.369	0	0.303	0.296	0.218	0.211	0.105	0.113	0.047	0.061	0.017	0.025
53.4	0.385	0	0.367	0	0.302	0.296	0.224	0.212	0.113	0.113	0.051	0.062	0.02	0.025
53.6	0.377	0	0.372	0	0.3	0.297	0.218	0.212	0.11	0.114	0.047	0.062	0.016	0.025
53.8	0.373	0	0.363	0	0.301	0.297	0.213	0.213	0.108	0.114	0.042	0.062	0.012	0.025
54	0.383	0	0.372	0	0.303	0.297	0.228	0.213	0.111	0.114	0.053	0.062	0.02	0.025
54.2	0.377	0	0.364	0	0.298	0.298	0.22	0.214	0.105	0.115	0.047	0.062	0.013	0.025
54.4	0.386	0	0.365	0	0.311	0.298	0.224	0.214	0.114	0.115	0.054	0.063	0.02	0.025
54.6	0.374	0	0.364	0	0.306	0.299	0.22	0.215	0.115	0.115	0.052	0.063	0.019	0.025
54.8	0.372	0	0.364	0	0.301	0.299	0.215	0.215	0.109	0.116	0.048	0.063	0.013	0.026
55	0.372	0	0.365	0	0.306	0.3	0.22	0.216	0.107	0.116	0.052	0.063	0.018	0.026
55.2	0.38	0	0.369	0	0.305	0.3	0.224	0.216	0.112	0.116	0.054	0.063	0.017	0.026
55.4	0.375	0	0.365	0	0.307	0.3	0.223	0.217	0.114	0.117	0.051	0.064	0.011	0.026
55.6	0.377	0	0.371	0	0.306	0.301	0.225	0.217	0.109	0.117	0.053	0.064	0.019	0.026
55.8	0.379	0	0.363	0	0.307	0.301	0.226	0.218	0.108	0.118	0.053	0.064	0.011	0.026
56	0.382	0	0.372	0	0.305	0.301	0.22	0.218	0.112	0.118	0.056	0.064	0.018	0.026
56.2	0.384	0	0.365	0	0.305	0.302	0.219	0.219	0.112	0.118	0.052	0.064	0.018	0.026
56.4	0.381	0	0.371	0	0.313	0.302	0.231	0.219	0.115	0.119	0.059	0.065	0.019	0.026
56.6	0.374	0	0.366	0	0.304	0.303	0.23	0.22	0.113	0.119	0.047	0.065	0.019	0.026
56.8	0.376	0	0.364	0	0.306	0.303	0.227	0.22	0.114	0.119	0.05	0.065	0.015	0.026
57	0.378	0	0.372	0	0.304	0.303	0.225	0.221	0.116	0.12	0.055	0.065	0.02	0.027
57.2	0.383	0	0.373	0	0.316	0.304	0.229	0.221	0.117	0.12	0.053	0.065	0.019	0.027
57.4	0.376	0	0.368	0	0.304	0.304	0.225	0.221	0.114	0.12	0.052	0.066	0.02	0.027
57.6	0.376	0	0.365	0	0.306	0.305	0.224	0.222	0.113	0.121	0.049	0.066	0.014	0.027
57.8	0.375	0	0.368	0	0.302	0.305	0.225	0.222	0.108	0.121	0.048	0.066	0.015	0.027
58	0.383	0	0.376	0	0.315	0.305	0.232	0.223	0.121	0.121	0.057	0.066	0.024	0.027
58.2	0.376	0	0.366	0	0.303	0.306	0.23	0.223	0.116	0.122	0.057	0.066	0.018	0.027
58.4	0.38	0	0.364	0	0.31	0.306	0.23	0.224	0.115	0.122	0.054	0.067	0.018	0.027
58.6	0.381	0	0.371	0	0.314	0.306	0.232	0.224	0.114	0.122	0.06	0.067	0.024	0.027
58.8	0.384	0	0.381	0	0.314	0.307	0.234	0.225	0.119	0.123	0.059	0.067	0.02	0.027
59	0.38	0	0.369	0	0.308	0.307	0.225	0.225	0.114	0.123	0.049	0.067	0.016	0.027
59.2	0.375	0	0.367	0	0.305	0.307	0.231	0.226	0.119	0.123	0.051	0.067	0.022	0.027
59.4	0.373	0	0.37	0	0.305	0.308	0.233	0.226	0.114	0.124	0.051	0.068	0.017	0.028
59.6	0.383	0	0.373	0	0.31	0.308	0.239	0.226	0.121	0.124	0.056	0.068	0.023	0.028
59.8	0.378	0	0.373	0	0.312	0.308	0.234	0.227	0.124	0.124	0.054	0.068	0.021	0.028
60	0.382	0	0.37	0	0.309	0.309	0.234	0.227	0.119	0.125	0.054	0.068	0.022	0.028
60.2	0.377	0	0.369	0	0.314	0.309	0.234	0.228	0.114	0.125	0.052	0.068	0.016	0.028
60.4	0.38	0	0.37	0	0.307	0.31	0.229	0.228	0.117	0.125	0.055	0.069	0.018	0.028
60.6	0.38	0	0.37	0	0.306	0.31	0.23	0.229	0.12	0.125	0.048	0.069	0.015	0.028
60.8	0.377	0	0.373	0	0.314	0.31	0.236	0.229	0.118	0.126	0.056	0.069	0.017	0.028
61	0.379	0	0.37	0	0.31	0.311	0.233	0.229	0.119	0.126	0.056	0.069	0.017	0.028
61.2	0.384	0	0.371	0	0.315	0.311	0.241	0.23	0.119	0.126	0.057	0.069	0.018	0.028
61.4	0.381	0	0.371	0	0.311	0.311	0.236	0.23	0.122	0.127	0.055	0.07	0.02	0.028
61.6	0.375	0	0.369	0	0.308	0.312	0.235	0.231	0.123	0.127	0.054	0.07	0.018	0.029
61.8	0.381	0	0.374	0	0.313	0.312	0.239	0.231	0.126	0.127	0.059	0.07	0.018	0.029
62	0.382	0	0.38	0	0.314	0.312	0.24	0.232	0.129	0.128	0.062	0.07	0.024	0.029
62.2	0.381	0	0.368	0	0.313	0.312	0.237	0.232	0.126	0.128	0.057	0.07	0.02	0.029
62.4	0.382	0	0.373	0	0.32	0.313	0.242	0.232	0.128	0.128	0.059	0.071	0.022	0.029
62.6	0.387	0	0.371	0	0.318	0.313	0.238	0.233	0.128	0.129	0.057	0.071	0.019	0.029
62.8	0.385	0	0.377	0	0.313	0.313	0.238	0.233	0.127	0.129	0.058	0.071	0.022	0.029
63	0.385	0	0.38	0	0.325	0.314	0.248	0.234	0.132	0.129	0.061	0.071	0.027	0.029
63.2	0.376	0	0.372	0	0.313	0.314	0.238	0.234	0.123	0.13	0.054	0.071	0.015	0.029
63.4	0.381	0	0.375	0	0.31	0.314	0.236	0.235	0.121	0.13	0.055	0.072	0.014	0.029
63.6	0.385	0	0.375	0	0.319	0.315	0.248	0.235	0.132	0.13	0.062	0.072	0.024	0.029
63.8	0.39	0	0.377	0	0.327	0.315	0.25	0.235	0.134	0.131	0.063	0.072	0.027	0.029
64	0.383	0	0.374	0	0.319	0.315	0.242	0.236	0.125	0.131	0.057	0.072	0.022	0.03
64.2	0.383	0	0.368	0	0.313	0.316	0.237	0.236	0.128	0.131	0.06	0.072	0.021	0.03
64.4	0.386	0	0.378	0	0.317	0.316	0.248	0.237	0.132	0.132	0.064	0.073	0.026	0.03
64.6	0.381	0	0.37	0	0.316	0.316	0.239	0.237	0.126	0.132	0.057	0.073	0.015	0.03
64.8	0.381	0	0.376	0	0.322	0.317	0.249	0.237	0.131	0.132	0.057	0.073	0.021	0.03
65	0.379	0	0.374	0	0.319	0.317	0.243	0.238	0.131	0.133	0.064	0.073	0.02	0.03
65.2	0.375	0	0.37	0	0.312	0.317	0.242	0.238	0.13	0.133	0.061	0.073	0.017	0.03
65.4	0.378	0	0.378	0	0.314	0.317	0.241	0.239	0.129	0.133	0.061	0.074	0.017	0.03
65.6	0.381	0	0.376	0	0.311	0.318	0.247	0.239	0.13	0.134	0.06	0.074	0.022	0.03
65.8	0.381	0	0.371	0	0.313	0.318	0.244	0.239	0.127	0.134	0.057	0.074	0.015	0.03
66	0.379	0	0.372	0	0.318	0.318	0.241	0.24	0.133	0.134	0.059	0.074	0.019	0.03
66.2	0.381	0	0.369	0	0.314	0.319	0.246	0.24	0.127	0.134	0.06	0.074	0.019	0.031
66.4	0.386	0	0.375	0	0.319	0.319	0.246	0.241	0.132	0.135	0.059	0.075	0.022	0.031
66.6	0.385	0	0.375	0	0.324	0.319	0.251	0.241	0.136	0.135	0.067	0.075	0.02	0.031
66.8	0.386	0	0.377	0	0.32	0.319	0.258	0.241	0.14	0.135	0.063	0.075	0.029	0.031
67	0.376	0	0.373	0	0.316	0.32	0.24	0.242	0.127	0.136	0.056	0.075	0.018	0.031
67.2	0.376	0	0.373	0	0.321	0.32	0.253	0.242	0.128	0.136	0.06	0.075	0.022	0.031
67.4	0.375	0	0.371	0	0.315	0.32	0.246	0.243	0.127	0.136	0.061	0.076	0.02	0.031
67.6	0.386	0	0.383	0	0.329	0.321	0.256	0.243	0.14	0.137	0.068	0.076	0.023	0.031
67.8	0.39	0	0.381	0	0.324	0.321	0.26	0.243	0.137	0.137	0.071	0.076	0.032	0.031
68	0.385	0	0.379	0	0.318	0.321	0.248	0.244	0.134	0.137	0.064	0.076	0.023	0.031
68.2	0.382	0	0.378	0	0.319	0.321	0.249	0.244	0.136	0.138	0.063	0.076	0.027	0.031
68.4	0.388	0	0.384	0	0.326	0.322	0.256	0.245	0.137	0.138	0.07	0.077	0.028	0.031
68.6	0.389	0	0.38	0	0.327	0.322	0.262	0.245	0.144	0.138	0.069	0.077	0.027	0.032
68.8	0.378	0	0.381	0	0.319	0.322	0.246	0.245	0.129	0.138	0.062	0.077	0.019	0.032
69	0.389	0	0.376	0	0.323	0.322	0.259	0.246	0.138	0.139	0.067	0.077	0.03	0.032
69.2	0.385	0	0.374	0	0.321	0.323	0.249	0.246	0.138	0.139	0.067	0.077	0.024	0.032
69.4	0.387	0	0.377	0	0.319	0.323	0.253	0.246	0.138	0.139	0.067	0.078	0.024	0.032
69.6	0.387	0	0.379	0	0.325	0.323	0.253	0.247	0.139	0.14	0.073	0.078	0.025	0.032
69.8	0.386	0	0.38	0	0.322	0.323	0.254	0.247	0.138	0.14	0.066	0.078	0.021	0.032
70	0.381	0	0.372	0	0.314	0.324	0.25	0.248	0.134	0.14	0.063	0.078	0.02	0.032
70.2	0.38	0	0.374	0	0.322	0.324	0.253	0.248	0.141	0.141	0.064	0.078	0.027	0.032
70.4	0.384	0	0.38	0	0.326	0.324	0.261	0.248	0.142	0.141	0.068	0.079	0.027	0.032
70.6	0.376	0	0.374	0	0.315	0.324	0.251	0.249	0.134	0.141	0.061	0.079	0.018	0.032
70.8	0.387	0	0.387	0	0.329	0.325	0.263	0.249	0.145	0.142	0.076	0.079	0.029	0.032
71	0.385	0	0.385	0	0.325	0.325	0.263	0.249	0.148	0.142	0.073	0.079	0.033	0.033
71.2	0.385	0	0.387	0	0.323	0.325	0.255	0.25	0.137	0.142	0.066	0.079	0.021	0.033
71.4	0.385	0	0.378	0	0.328	0.325	0.257	0.25	0.143	0.142	0.067	0.08	0.024	0.033
71.6	0.386	0	0.382	0	0.329	0.326	0.256	0.251	0.138	0.143	0.07	0.08	0.025	0.033
71.8	0.383	0	0.374	0	0.321	0.326	0.248	0.251	0.138	0.143	0.061	0.08	0.022	0.033
72	0.383	0	0.376	0	0.324	0.326	0.256	0.251	0.14	0.143	0.069	0.08	0.025	0.033
72.2	0.389	0	0.378	0	0.323	0.326	0.255	0.252	0.144	0.144	0.066	0.08	0.022	0.033
72.4	0.386	0	0.383	0	0.327	0.327	0.258	0.252	0.146	0.144	0.073	0.08	0.025	0.033
72.6	0.391	0	0.387	0	0.328	0.327	0.265	0.252	0.154	0.144	0.062	0.081	0.031	0.033
72.8	0.388	0	0.386	0	0.332	0.327	0.267	0.253	0.148	0.145	0.067	0.081	0.032	0.033
73	0.383	0	0.379	0	0.329	0.327	0.254	0.253	0.146	0.145	0.071	0.081	0.025	0.033
73.2	0.38	0	0.376	0	0.321	0.328	0.263	0.253	0.14	0.145	0.07	0.081	0.018	0.034
73.4	0.384	0	0.382	0	0.322	0.328	0.257	0.254	0.142	0.145	0.074	0.081	0.021	0.034
73.6	0.389	0	0.384	0	0.332	0.328	0.269	0.254	0.147	0.146	0.071	0.082	0.029	0.034
73.8	0.388	0	0.383	0	0.332	0.328	0.261	0.255	0.149	0.146	0.07	0.082	0.026	0.034
74	0.385	0	0.383	0	0.325	0.328	0.263	0.255	0.147	0.146	0.07	0.082	0.026	0.034
74.2	0.39	0	0.385	0	0.328	0.329	0.26	0.255	0.145	0.147	0.072	0.082	0.024	0.034
74.4	0.38	0	0.38	0	0.324	0.329	0.26	0.256	0.147	0.147	0.07	0.082	0.021	0.034
74.6	0.385	0	0.384	0	0.329	0.329	0.263	0.256	0.151	0.147	0.069	0.083	0.03	0.034
74.8	0.386	0	0.384	0	0.332	0.329	0.265	0.256	0.152	0.148	0.073	0.083	0.025	0.034
75	0.387	0	0.382	0	0.323	0.33	0.262	0.257	0.149	0.148	0.075	0.083	0.03	0.034
75.2	0.386	0	0.385	0	0.331	0.33	0.266	0.257	0.15	0.148	0.076	0.083	0.029	0.034
75.4	0.379	0	0.379	0	0.326	0.33	0.26	0.257	0.143	0.148	0.066	0.083	0.024	0.034
75.6	0.386	0	0.38	0	0.33	0.33	0.264	0.258	0.147	0.149	0.069	0.084	0.03	0.035
75.8	0.381	0	0.382	0	0.325	0.33	0.26	0.258	0.151	0.149	0.063	0.084	0.026	0.035
76	0.385	0	0.381	0	0.329	0.331	0.26	0.258	0.15	0.149	0.073	0.084	0.024	0.035
76.2	0.387	0	0.384	0	0.33	0.331	0.263	0.259	0.152	0.15	0.075	0.084	0.03	0.035
76.4	0.38	0	0.381	0	0.32	0.331	0.262	0.259	0.147	0.15	0.069	0.084	0.023	0.035
76.6	0.393	0	0.388	0	0.336	0.331	0.272	0.259	0.157	0.15	0.078	0.085	0.032	0.035
76.8	0.381	0	0.383	0	0.325	0.331	0.265	0.26	0.147	0.15	0.071	0.085	0.03	0.035
77	0.396	0	0.385	0	0.334	0.332	0.267	0.26	0.153	0.151	0.076	0.085	0.032	0.035
77.2	0.383	0	0.388	0	0.328	0.332	0.262	0.26	0.151	0.151	0.07	0.085	0.023	0.035
77.4	0.394	0	0.384	0	0.333	0.332	0.271	0.261	0.155	0.151	0.08	0.085	0.028	0.035
77.6	0.384	0	0.376	0	0.326	0.332	0.263	0.261	0.153	0.152	0.071	0.085	0.026	0.035
77.8	0.392	0	0.384	0	0.333	0.333	0.271	0.261	0.157	0.152	0.078	0.086	0.031	0.035
78	0.388	0	0.381	0	0.332	0.333	0.268	0.262	0.154	0.152	0.076	0.086	0.031	0.036
78.2	0.384	0	0.379	0	0.328	0.333	0.268	0.262	0.155	0.152	0.08	0.086	0.023	0.036
78.4	0.389	0	0.38	0	0.333	0.333	0.271	0.262	0.157	0.153	0.078	0.086	0.036	0.036
78.6	0.384	0	0.385	0	0.331	0.333	0.271	0.263	0.151	0.153	0.073	0.086	0.02	0.036
78.8	0.388	0	0.384	0	0.333	0.334	0.267	0.263	0.155	0.153	0.076	0.087	0.023	0.036
79	0.384	0	0.388	0	0.335	0.334	0.272	0.263	0.157	0.154	0.079	0.087	0.028	0.036
79.2	0.387	0	0.382	0	0.325	0.334	0.267	0.264	0.152	0.154	0.073	0.087	0.029	0.036
79.4	0.391	0	0.387	0	0.327	0.334	0.269	0.264	0.158	0.154	0.075	0.087	0.028	0.036
79.6	0.39	0	0.386	0	0.337	0.334	0.269	0.264	0.155	0.154	0.076	0.087	0.025	0.036
79.8	0.384	0	0.388	0	0.328	0.334	0.265	0.265	0.157	0.155	0.079	0.088	0.031	0.036
80	0.389	0	0.39	0	0.332	0.335	0.275	0.265	0.16	0.155	0.079	0.088	0.028	0.036
80.2	0.393	0	0.389	0	0.333	0.335	0.277	0.265	0.16	0.155	0.08	0.088	0.03	0.036
80.4	0.386	0	0.386	0	0.331	0.335	0.271	0.266	0.153	0.156	0.074	0.088	0.032	0.037
80.6	0.385	0	0.386	0	0.333	0.335	0.269	0.266	0.152	0.156	0.077	0.088	0.025	0.037
80.8	0.388	0	0.385	0	0.333	0.335	0.269	0.266	0.159	0.156	0.073	0.088	0.026	0.037
81	0.387	0	0.385	0	0.328	0.336	0.27	0.267	0.154	0.156	0.074	0.089	0.022	0.037
81.2	0.391	0	0.389	0	0.334	0.336	0.276	0.267	0.158	0.157	0.079	0.089	0.031	0.037
81.4	0.385	0	0.39	0	0.337	0.336	0.272	0.267	0.161	0.157	0.075	0.089	0.027	0.037
81.6	0.391	0	0.386	0	0.335	0.336	0.275	0.268	0.161	0.157	0.079	0.089	0.035	0.037
81.8	0.394	0	0.388	0	0.339	0.336	0.275	0.268	0.161	0.158	0.079	0.089	0.033	0.037
82	0.39	0	0.389	0	0.334	0.336	0.272	0.268	0.159	0.158	0.079	0.09	0.025	0.037
82.2	0.387	0	0.387	0	0.331	0.337	0.273	0.269	0.164	0.158	0.082	0.09	0.03	0.037
82.4	0.39	0	0.389	0	0.336	0.337	0.268	0.269	0.157	0.158	0.078	0.09	0.025	0.037
82.6	0.384	0	0.381	0	0.332	0.337	0.276	0.269	0.161	0.159	0.078	0.09	0.028	0.037
82.8	0.393	0	0.389	0	0.339	0.337	0.276	0.269	0.166	0.159	0.078	0.09	0.031	0.038
83	0.385	0	0.387	0	0.333	0.337	0.274	0.27	0.165	0.159	0.078	0.09	0.026	0.038
83.2	0.39	0	0.39	0	0.334	0.338	0.278	0.27	0.164	0.159	0.078	0.091	0.036	0.038
83.4	0.389	0	0.387	0	0.334	0.338	0.274	0.27	0.163	0.16	0.077	0.091	0.032	0.038
83.6	0.388	0	0.389	0	0.333	0.338	0.276	0.271	0.163	0.16	0.081	0.091	0.029	0.038
83.8	0.386	0	0.387	0	0.335	0.338	0.273	0.271	0.163	0.16	0.075	0.091	0.029	0.038
84	0.382	0	0.383	0	0.334	0.338	0.278	0.271	0.16	0.161	0.08	0.091	0.027	0.038
84.2	0.385	0	0.384	0	0.336	0.338	0.274	0.272	0.162	0.161	0.083	0.092	0.032	0.038
84.4	0.386	0	0.387	0	0.329	0.339	0.274	0.272	0.16	0.161	0.078	0.092	0.024	0.038
84.6	0.386	0	0.384	0	0.336	0.339	0.276	0.272	0.173	0.161	0.082	0.092	0.028	0.038
84.8	0.394	0	0.393	0	0.34	0.339	0.286	0.272	0.168	0.162	0.084	0.092	0.034	0.038
85	0.393	0	0.392	0	0.341	0.339	0.279	0.273	0.164	0.162	0.085	0.092	0.031	0.038
85.2	0.392	0	0.386	0	0.334	0.339	0.279	0.273	0.167	0.162	0.082	0.093	0.036	0.039
85.4	0.389	0	0.385	0	0.331	0.339	0.274	0.273	0.162	0.162	0.081	0.093	0.028	0.039
85.6	0.39	0	0.389	0	0.338	0.339	0.283	0.274	0.167	0.163	0.087	0.093	0.036	0.039
85.8	0.384	0	0.386	0	0.34	0.34	0.279	0.274	0.169	0.163	0.08	0.093	0.031	0.039
86	0.388	0	0.388	0	0.338	0.34	0.279	0.274	0.164	0.163	0.083	0.093	0.029	0.039
86.2	0.387	0	0.385	0	0.333	0.34	0.279	0.275	0.164	0.164	0.082	0.093	0.025	0.039
86.4	0.389	0	0.388	0	0.338	0.34	0.279	0.275	0.166	0.164	0.086	0.094	0.034	0.039
86.6	0.386	0	0.393	0	0.336	0.34	0.282	0.275	0.165	0.164	0.084	0.094	0.031	0.039
86.8	0.392	0	0.389	0	0.342	0.34	0.285	0.275	0.17	0.164	0.089	0.094	0.034	0.039
87	0.386	0	0.386	0	0.333	0.341	0.28	0.276	0.166	0.165	0.075	0.094	0.03	0.039
87.2	0.392	0	0.391	0	0.341	0.341	0.28	0.276	0.17	0.165	0.089	0.094	0.035	0.039
87.4	0.386	0	0.385	0	0.332	0.341	0.277	0.276	0.166	0.165	0.084	0.095	0.032	0.039
87.6	0.39	0	0.393	0	0.339	0.341	0.288	0.277	0.172	0.165	0.089	0.095	0.034	0.04
87.8	0.387	0	0.392	0	0.337	0.341	0.279	0.277	0.174	0.166	0.085	0.095	0.037	0.04
88	0.393	0	0.39	0	0.336	0.341	0.282	0.277	0.165	0.166	0.083	0.095	0.029	0.04
88.2	0.387	0	0.387	0	0.337	0.341	0.279	0.277	0.168	0.166	0.082	0.095	0.034	0.04
88.4	0.387	0	0.389	0	0.337	0.342	0.277	0.278	0.165	0.166	0.08	0.095	0.032	0.04
88.6	0.387	0	0.389	0	0.339	0.342	0.285	0.278	0.167	0.167	0.084	0.096	0.034	0.04
88.8	0.39	0	0.392	0	0.34	0.342	0.288	0.278	0.172	0.167	0.09	0.096	0.034	0.04
89	0.398	0	0.393	0	0.338	0.342	0.281	0.279	0.173	0.167	0.085	0.096	0.034	0.04
89.2	0.392	0	0.38	0	0.34	0.342	0.283	0.279	0.171	0.168	0.083	0.096	0.032	0.04
89.4	0.391	0	0.388	0	0.336	0.342	0.286	0.279	0.169	0.168	0.083	0.096	0.032	0.04
89.6	0.391	0	0.391	0	0.336	0.342	0.282	0.279	0.171	0.168	0.087	0.096	0.03	0.04
89.8	0.394	0	0.393	0	0.346	0.343	0.287	0.28	0.177	0.168	0.094	0.097	0.04	0.04
90	0.39	0	0.391	0	0.34	0.343	0.287	0.28	0.179	0.169	0.09	0.097	0.035	0.04
90.2	0.392	0	0.39	0	0.343	0.343	0.287	0.28	0.177	0.169	0.089	0.097	0.035	0.041
90.4	0.391	0	0.39	0	0.339	0.343	0.282	0.281	0.174	0.169	0.088	0.097	0.041	0.041
90.6	0.387	0	0.394	0	0.344	0.343	0.292	0.281	0.175	0.169	0.091	0.097	0.034	0.041
90.8	0.384	0	0.391	0	0.336	0.343	0.278	0.281	0.174	0.17	0.085	0.098	0.035	0.041
91	0.397	0	0.39	0	0.34	0.343	0.287	0.281	0.179	0.17	0.09	0.098	0.038	0.041
91.2	0.391	0	0.394	0	0.342	0.344	0.285	0.282	0.172	0.17	0.09	0.098	0.037	0.041
91.4	0.389	0	0.391	0	0.34	0.344	0.282	0.282	0.175	0.17	0.085	0.098	0.034	0.041
91.6	0.388	0	0.392	0	0.339	0.344	0.281	0.282	0.171	0.171	0.091	0.098	0.033	0.041
91.8	0.392	0	0.39	0	0.339	0.344	0.281	0.282	0.175	0.171	0.088	0.098	0.033	0.041
92	0.388	0	0.388	0	0.338	0.344	0.284	0.283	0.179	0.171	0.084	0.099	0.032	0.041
92.2	0.382	0	0.386	0	0.335	0.344	0.281	0.283	0.174	0.171	0.087	0.099	0.033	0.041
92.4	0.391	0	0.385	0	0.335	0.344	0.282	0.283	0.175	0.172	0.092	0.099	0.033	0.041
92.6	0.389	0	0.387	0	0.339	0.345	0.287	0.283	0.174	0.172	0.089	0.099	0.032	0.042
92.8	0.388	0	0.385	0	0.336	0.345	0.279	0.284	0.175	0.172	0.086	0.099	0.032	0.042
93	0.394	0	0.389	0	0.335	0.345	0.288	0.284	0.177	0.172	0.088	0.1	0.034	0.042
93.2	0.396	0	0.398	0	0.348	0.345	0.296	0.284	0.183	0.173	0.097	0.1	0.039	0.042
93.4	0.384	0	0.389	0	0.341	0.345	0.284	0.285	0.173	0.173	0.087	0.1	0.034	0.042
93.6	0.387	0	0.391	0	0.336	0.345	0.278	0.285	0.172	0.173	0.091	0.1	0.032	0.042
93.8	0.389	0	0.388	0	0.34	0.345	0.283	0.285	0.171	0.173	0.086	0.1	0.033	0.042
94	0.39	0	0.392	0	0.344	0.345	0.288	0.285	0.177	0.174	0.094	0.1	0.04	0.042
94.2	0.39	0	0.388	0	0.339	0.346	0.283	0.286	0.171	0.174	0.087	0.101	0.034	0.042
94.4	0.394	0	0.394	0	0.349	0.346	0.294	0.286	0.184	0.174	0.095	0.101	0.037	0.042
94.6	0.391	0	0.398	0	0.349	0.346	0.298	0.286	0.183	0.175	0.09	0.101	0.045	0.042
94.8	0.391	0	0.392	0	0.341	0.346	0.29	0.286	0.178	0.175	0.088	0.101	0.035	0.042
95	0.385	0	0.388	0	0.339	0.346	0.283	0.287	0.176	0.175	0.086	0.101	0.03	0.043
95.2	0.384	0	0.386	0	0.339	0.346	0.285	0.287	0.173	0.175	0.091	0.101	0.032	0.043
95.4	0.388	0	0.401	0	0.347	0.346	0.292	0.287	0.188	0.176	0.097	0.102	0.045	0.043
95.6	0.388	0	0.388	0	0.347	0.346	0.291	0.287	0.182	0.176	0.088	0.102	0.038	0.043
95.8	0.388	0	0.391	0	0.343	0.346	0.287	0.288	0.176	0.176	0.088	0.102	0.029	0.043
96	0.383	0	0.391	0	0.341	0.347	0.286	0.288	0.179	0.176	0.089	0.102	0.034	0.043
96.2	0.393	0	0.394	0	0.346	0.347	0.289	0.288	0.179	0.177	0.088	0.102	0.036	0.043
96.4	0.39	0	0.389	0	0.341	0.347	0.29	0.288	0.179	0.177	0.094	0.103	0.033	0.043
96.6	0.389	0	0.397	0	0.339	0.347	0.288	0.289	0.181	0.177	0.094	0.103	0.034	0.043
96.8	0.39	0	0.392	0	0.34	0.347	0.292	0.289	0.184	0.177	0.092	0.103	0.039	0.043
97	0.394	0	0.4	0	0.35	0.347	0.296	0.289	0.186	0.178	0.098	0.103	0.04	0.043
97.2	0.389	0	0.394	0	0.343	0.347	0.285	0.289	0.184	0.178	0.094	0.103	0.035	0.043
97.4	0.388	0	0.39	0	0.338	0.347	0.287	0.29	0.177	0.178	0.09	0.103	0.033	0.043
97.6	0.387	0	0.391	0	0.344	0.348	0.294	0.29	0.183	0.178	0.094	0.104	0.037	0.044
97.8	0.391	0	0.39	0	0.345	0.348	0.294	0.29	0.186	0.179	0.092	0.104	0.04	0.044
98	0.389	0	0.395	0	0.343	0.348	0.295	0.29	0.184	0.179	0.093	0.104	0.037	0.044
98.2	0.39	0	0.398	0	0.344	0.348	0.29	0.291	0.185	0.179	0.096	0.104	0.037	0.044
98.4	0.385	0	0.39	0	0.345	0.348	0.285	0.291	0.18	0.179	0.092	0.104	0.034	0.044
98.6	0.393	0	0.397	0	0.345	0.348	0.29	0.291	0.182	0.179	0.096	0.104	0.037	0.044
98.8	0.388	0	0.392	0	0.341	0.348	0.293	0.291	0.183	0.18	0.098	0.105	0.038	0.044
99	0.385	0	0.389	0	0.342	0.348	0.289	0.292	0.182	0.18	0.09	0.105	0.028	0.044
99.2	0.39	0	0.395	0	0.347	0.348	0.294	0.292	0.183	0.18	0.1	0.105	0.039	0.044
99.4	0.388	0	0.388	0	0.346	0.348	0.29	0.292	0.186	0.18	0.097	0.105	0.039	0.044
99.6	0.396	0	0.396	0	0.348	0.349	0.296	0.292	0.195	0.181	0.1	0.105	0.043	0.044
99.8	0.394	0	0.394	0	0.347	0.349	0.291	0.293	0.185	0.181	0.097	0.105	0.04	0.044
100	0.399	0	0.396	0	0.351	0.349	0.299	0.293	0.188	0.181	0.102	0.106	0.044	0.045
100.2	0.391	0	0.395	0	0.347	0.349	0.297	0.293	0.196	0.181	0.098	0.106	0.039	0.045
100.4	0.392	0	0.397	0	0.35	0.349	0.297	0.293	0.189	0.182	0.094	0.106	0.041	0.045
100.6	0.392	0	0.396	0	0.343	0.349	0.295	0.293	0.183	0.182	0.097	0.106	0.037	0.045
100.8	0.387	0	0.395	0	0.348	0.349	0.298	0.294	0.189	0.182	0.096	0.106	0.038	0.045
101	0.386	0	0.388	0	0.341	0.349	0.293	0.294	0.182	0.182	0.092	0.107	0.033	0.045
101.2	0.391	0	0.394	0	0.351	0.349	0.295	0.294	0.189	0.183	0.094	0.107	0.038	0.045
101.4	0.39	0	0.395	0	0.347	0.35	0.294	0.294	0.186	0.183	0.095	0.107	0.038	0.045
101.6	0.391	0	0.39	0	0.348	0.35	0.303	0.295	0.19	0.183	0.099	0.107	0.039	0.045
101.8	0.396	0	0.4	0	0.349	0.35	0.299	0.295	0.195	0.183	0.106	0.107	0.043	0.045
102	0.39	0	0.393	0	0.347	0.35	0.295	0.295	0.19	0.184	0.099	0.107	0.038	0.045
102.2	0.393	0	0.396	0	0.347	0.35	0.292	0.295	0.192	0.184	0.096	0.108	0.036	0.045
102.4	0.388	0	0.395	0	0.345	0.35	0.293	0.296	0.184	0.184	0.096	0.108	0.037	0.045
102.6	0.397	0	0.403	0	0.353	0.35	0.297	0.296	0.198	0.184	0.108	0.108	0.044	0.046
102.8	0.389	0	0.398	0	0.344	0.35	0.295	0.296	0.192	0.185	0.099	0.108	0.044	0.046
103	0.395	0	0.396	0	0.346	0.35	0.303	0.296	0.191	0.185	0.099	0.108	0.043	0.046
103.2	0.393	0	0.394	0	0.35	0.35	0.294	0.296	0.189	0.185	0.1	0.108	0.044	0.046
103.4	0.393	0	0.396	0	0.345	0.35	0.296	0.297	0.192	0.185	0.101	0.109	0.041	0.046
103.6	0.396	0	0.395	0	0.351	0.351	0.294	0.297	0.189	0.186	0.105	0.109	0.04	0.046
103.8	0.396	0	0.394	0	0.344	0.351	0.299	0.297	0.191	0.186	0.102	0.109	0.038	0.046
104	0.396	0	0.395	0	0.348	0.351	0.301	0.297	0.193	0.186	0.101	0.109	0.043	0.046
104.2	0.39	0	0.394	0	0.345	0.351	0.293	0.298	0.187	0.186	0.098	0.109	0.04	0.046
104.4	0.388	0	0.391	0	0.344	0.351	0.293	0.298	0.186	0.186	0.099	0.109	0.032	0.046
104.6	0.397	0	0.394	0	0.347	0.351	0.3	0.298	0.192	0.187	0.107	0.11	0.042	0.046
104.8	0.391	0	0.393	0	0.345	0.351	0.296	0.298	0.19	0.187	0.103	0.11	0.039	0.046
105	0.4	0	0.402	0	0.354	0.351	0.302	0.298	0.198	0.187	0.109	0.11	0.045	0.047
105.2	0.39	0	0.393	0	0.344	0.351	0.294	0.299	0.19	0.187	0.097	0.11	0.036	0.047
105.4	0.399	0	0.401	0	0.352	0.351	0.306	0.299	0.197	0.188	0.106	0.11	0.046	0.047
105.6	0.393	0	0.394	0	0.35	0.351	0.293	0.299	0.195	0.188	0.101	0.11	0.042	0.047
105.8	0.395	0	0.395	0	0.347	0.352	0.299	0.299	0.193	0.188	0.101	0.111	0.04	0.047
106	0.393	0	0.393	0	0.344	0.352	0.299	0.3	0.193	0.188	0.107	0.111	0.039	0.047
106.2	0.397	0	0.399	0	0.351	0.352	0.298	0.3	0.2	0.189	0.106	0.111	0.041	0.047
106.4	0.398	0	0.399	0	0.356	0.352	0.306	0.3	0.201	0.189	0.104	0.111	0.048	0.047
106.6	0.395	0	0.396	0	0.352	0.352	0.3	0.3	0.197	0.189	0.104	0.111	0.046	0.047
106.8	0.391	0	0.395	0	0.346	0.352	0.295	0.3	0.194	0.189	0.103	0.111	0.045	0.047
107	0.389	0	0.391	0	0.343	0.352	0.293	0.301	0.189	0.189	0.1	0.112	0.04	0.047
107.2	0.394	0	0.395	0	0.352	0.352	0.299	0.301	0.192	0.19	0.1	0.112	0.039	0.047
107.4	0.394	0	0.396	0	0.351	0.352	0.3	0.301	0.194	0.19	0.104	0.112	0.044	0.047
107.6	0.396	0	0.4	0	0.352	0.352	0.302	0.301	0.193	0.19	0.104	0.112	0.045	0.048
107.8	0.396	0	0.397	0	0.351	0.352	0.306	0.302	0.2	0.19	0.102	0.112	0.045	0.048
108	0.397	0	0.399	0	0.357	0.352	0.298	0.302	0.198	0.191	0.11	0.112	0.044	0.048
108.2	0.396	0	0.395	0	0.349	0.353	0.3	0.302	0.198	0.191	0.106	0.113	0.042	0.048
108.4	0.398	0	0.397	0	0.351	0.353	0.302	0.302	0.199	0.191	0.108	0.113	0.045	0.048
108.6	0.393	0	0.395	0	0.348	0.353	0.3	0.302	0.196	0.191	0.1	0.113	0.043	0.048
108.8	0.395	0	0.399	0	0.356	0.353	0.304	0.303	0.2	0.192	0.105	0.113	0.042	0.048
109	0.391	0	0.402	0	0.349	0.353	0.301	0.303	0.197	0.192	0.104	0.113	0.046	0.048
109.2	0.394	0	0.396	0	0.348	0.353	0.302	0.303	0.199	0.192	0.097	0.113	0.043	0.048
109.4	0.394	0	0.399	0	0.354	0.353	0.305	0.303	0.203	0.192	0.105	0.114	0.048	0.048
109.6	0.393	0	0.395	0	0.35	0.353	0.302	0.303	0.195	0.192	0.104	0.114	0.043	0.048
109.8	0.391	0	0.393	0	0.346	0.353	0.303	0.304	0.197	0.193	0.104	0.114	0.04	0.048
110	0.384	0	0.393	0	0.347	0.353	0.296	0.304	0.187	0.193	0.101	0.114	0.036	0.048
110.2	0.391	0	0.393	0	0.347	0.353	0.295	0.304	0.19	0.193	0.098	0.114	0.041	0.049
110.4	0.392	0	0.396	0	0.349	0.353	0.301	0.304	0.192	0.193	0.106	0.114	0.047	0.049
110.6	0.399	0	0.401	0	0.354	0.353	0.303	0.304	0.204	0.194	0.107	0.115	0.045	0.049
110.8	0.398	0	0.399	0	0.354	0.354	0.304	0.305	0.204	0.194	0.104	0.115	0.048	0.049
111	0.391	0	0.395	0	0.347	0.354	0.305	0.305	0.199	0.194	0.109	0.115	0.044	0.049
111.2	0.397	0	0.394	0	0.352	0.354	0.308	0.305	0.198	0.194	0.112	0.115	0.04	0.049
111.4	0.394	0	0.401	0	0.354	0.354	0.306	0.305	0.202	0.194	0.107	0.115	0.044	0.049
111.6	0.394	0	0.399	0	0.356	0.354	0.306	0.305	0.2	0.195	0.108	0.115	0.045	0.049
111.8	0.4	0	0.402	0	0.354	0.354	0.31	0.306	0.207	0.195	0.111	0.116	0.05	0.049
112	0.395	0	0.398	0	0.356	0.354	0.306	0.306	0.201	0.195	0.111	0.116	0.044	0.049
112.2	0.398	0	0.396	0	0.358	0.354	0.304	0.306	0.205	0.195	0.111	0.116	0.048	0.049
112.4	0.397	0	0.402	0	0.351	0.354	0.31	0.306	0.202	0.196	0.108	0.116	0.048	0.049
112.6	0.396	0	0.397	0	0.359	0.354	0.307	0.306	0.207	0.196	0.112	0.116	0.047	0.05
112.8	0.397	0	0.396	0	0.352	0.354	0.306	0.307	0.199	0.196	0.107	0.116	0.045	0.05
113	0.398	0	0.396	0	0.357	0.354	0.309	0.307	0.199	0.196	0.112	0.117	0.041	0.05
113.2	0.396	0	0.401	0	0.353	0.354	0.303	0.307	0.201	0.196	0.109	0.117	0.05	0.05
113.4	0.394	0	0.398	0	0.351	0.355	0.307	0.307	0.201	0.197	0.111	0.117	0.047	0.05
113.6	0.397	0	0.392	0	0.35	0.355	0.301	0.307	0.203	0.197	0.108	0.117	0.043	0.05
113.8	0.399	0	0.399	0	0.359	0.355	0.311	0.308	0.208	0.197	0.109	0.117	0.047	0.05
114	0.4	0	0.398	0	0.355	0.355	0.308	0.308	0.206	0.197	0.113	0.117	0.05	0.05
114.2	0.397	0	0.4	0	0.352	0.355	0.304	0.308	0.204	0.198	0.11	0.118	0.041	0.05
114.4	0.391	0	0.4	0	0.346	0.355	0.298	0.308	0.206	0.198	0.11	0.118	0.043	0.05
114.6	0.382	0	0.389	0	0.347	0.355	0.298	0.308	0.196	0.198	0.1	0.118	0.039	0.05
114.8	0.397	0	0.395	0	0.352	0.355	0.306	0.309	0.203	0.198	0.108	0.118	0.046	0.05
115	0.39	0	0.398	0	0.354	0.355	0.307	0.309	0.206	0.198	0.104	0.118	0.046	0.05
115.2	0.398	0	0.402	0	0.357	0.355	0.311	0.309	0.208	0.199	0.12	0.118	0.047	0.051
115.4	0.396	0	0.404	0	0.354	0.355	0.305	0.309	0.209	0.199	0.113	0.119	0.048	0.051
115.6	0.391	0	0.395	0	0.343	0.355	0.305	0.309	0.201	0.199	0.107	0.119	0.043	0.051
115.8	0.403	0	0.4	0	0.355	0.355	0.308	0.309	0.212	0.199	0.11	0.119	0.051	0.051
116	0.398	0	0.403	0	0.354	0.355	0.309	0.31	0.207	0.2	0.113	0.119	0.048	0.051
116.2	0.393	0	0.396	0	0.352	0.355	0.308	0.31	0.207	0.2	0.111	0.119	0.044	0.051
116.4	0.396	0	0.393	0	0.354	0.356	0.305	0.31	0.201	0.2	0.11	0.119	0.046	0.051
116.6	0.397	0	0.397	0	0.357	0.356	0.31	0.31	0.212	0.2	0.109	0.12	0.045	0.051
116.8	0.391	0	0.398	0	0.352	0.356	0.302	0.31	0.205	0.2	0.111	0.12	0.039	0.051
117	0.394	0	0.397	0	0.355	0.356	0.309	0.311	0.205	0.201	0.108	0.12	0.042	0.051
117.2	0.401	0	0.402	0	0.355	0.356	0.31	0.311	0.208	0.201	0.111	0.12	0.051	0.051
117.4	0.395	0	0.396	0	0.351	0.356	0.307	0.311	0.208	0.201	0.118	0.12	0.05	0.051
117.6	0.396	0	0.395	0	0.353	0.356	0.308	0.311	0.207	0.201	0.112	0.12	0.041	0.051
117.8	0.402	0	0.411	0	0.361	0.356	0.317	0.311	0.215	0.201	0.123	0.12	0.054	0.052
118	0.392	0	0.396	0	0.355	0.356	0.31	0.311	0.208	0.202	0.113	0.121	0.044	0.052
118.2	0.393	0	0.392	0	0.354	0.356	0.308	0.312	0.202	0.202	0.108	0.121	0.044	0.052
118.4	0.39	0	0.4	0	0.354	0.356	0.304	0.312	0.205	0.202	0.115	0.121	0.043	0.052
118.6	0.395	0	0.399	0	0.351	0.356	0.306	0.312	0.208	0.202	0.118	0.121	0.052	0.052
118.8	0.396	0	0.399	0	0.354	0.356	0.31	0.312	0.21	0.203	0.118	0.121	0.054	0.052
119	0.391	0	0.396	0	0.352	0.356	0.302	0.312	0.21	0.203	0.11	0.121	0.046	0.052
119.2	0.395	0	0.399	0	0.351	0.356	0.306	0.313	0.204	0.203	0.114	0.122	0.046	0.052
119.4	0.394	0	0.398	0	0.357	0.356	0.308	0.313	0.208	0.203	0.113	0.122	0.045	0.052
119.6	0.388	0	0.396	0	0.35	0.356	0.307	0.313	0.213	0.203	0.114	0.122	0.047	0.052
119.8	0.392	0	0.396	0	0.348	0.357	0.304	0.313	0.207	0.204	0.114	0.122	0.043	0.052
120.004	0.392	0	0.396	0	0.348	0.357	0.304	0.313	0.207	0.204	0.114	0.122	0.043	0.052
120.204	0.392	0	0.388	0	0.354	0.356	0.312	0.313	0.212	0.204	0.125	0.122	0.05	0.052
120.404	0.384	0	0.388	0	0.348	0.356	0.311	0.313	0.212	0.204	0.116	0.122	0.047	0.052
120.604	0.387	0	0.387	0	0.355	0.356	0.308	0.313	0.21	0.204	0.121	0.122	0.047	0.052
120.804	0.389	0	0.388	0	0.352	0.355	0.31	0.313	0.211	0.204	0.121	0.122	0.052	0.052
121.004	0.382	0	0.384	0	0.349	0.355	0.311	0.312	0.21	0.204	0.12	0.122	0.047	0.052
121.204	0.378	0	0.382	0	0.35	0.355	0.305	0.312	0.205	0.204	0.117	0.122	0.047	0.052
121.404	0.381	0	0.383	0	0.35	0.355	0.307	0.312	0.209	0.204	0.12	0.122	0.047	0.052
121.604	0.378	0	0.377	0	0.346	0.354	0.306	0.312	0.208	0.204	0.119	0.122	0.045	0.052
121.804	0.379	0	0.386	0	0.347	0.354	0.313	0.312	0.214	0.204	0.125	0.122	0.053	0.052
122.004	0.382	0	0.384	0	0.342	0.354	0.308	0.312	0.214	0.204	0.125	0.122	0.051	0.052
122.204	0.384	0	0.382	0	0.345	0.354	0.308	0.311	0.21	0.204	0.12	0.122	0.049	0.052
122.404	0.377	0	0.386	0	0.345	0.353	0.309	0.311	0.202	0.204	0.12	0.122	0.046	0.052
122.604	0.376	0	0.38	0	0.35	0.353	0.311	0.311	0.21	0.204	0.127	0.122	0.06	0.052
122.804	0.373	0	0.378	0	0.344	0.353	0.305	0.311	0.211	0.204	0.123	0.122	0.046	0.052
123.004	0.379	0	0.381	0	0.343	0.353	0.309	0.311	0.21	0.204	0.124	0.122	0.051	0.052
123.204	0.377	0	0.379	0	0.346	0.352	0.309	0.311	0.211	0.204	0.127	0.122	0.055	0.052
123.404	0.378	0	0.382	0	0.35	0.352	0.313	0.311	0.213	0.204	0.124	0.122	0.055	0.052
123.604	0.378	0	0.381	0	0.345	0.352	0.308	0.31	0.212	0.204	0.121	0.122	0.056	0.052
123.804	0.373	0	0.383	0	0.345	0.352	0.31	0.31	0.216	0.204	0.124	0.122	0.055	0.052
124.004	0.37	0	0.372	0	0.34	0.351	0.306	0.31	0.207	0.204	0.116	0.122	0.049	0.052
124.204	0.373	0	0.375	0	0.345	0.351	0.306	0.31	0.212	0.204	0.122	0.122	0.051	0.052
124.404	0.37	0	0.373	0	0.345	0.351	0.307	0.31	0.213	0.203	0.121	0.122	0.051	0.052
124.604	0.369	0	0.375	0	0.344	0.351	0.308	0.31	0.212	0.203	0.119	0.122	0.049	0.052
124.804	0.371	0	0.37	0	0.345	0.35	0.304	0.309	0.206	0.203	0.123	0.122	0.052	0.052
125.004	0.37	0	0.376	0	0.346	0.35	0.309	0.309	0.215	0.203	0.122	0.122	0.049	0.052
125.204	0.37	0	0.375	0	0.344	0.35	0.308	0.309	0.21	0.203	0.123	0.122	0.047	0.052
125.404	0.368	0	0.373	0	0.344	0.35	0.305	0.309	0.211	0.203	0.126	0.122	0.054	0.052
125.604	0.371	0	0.375	0	0.336	0.349	0.301	0.309	0.213	0.203	0.124	0.122	0.048	0.052
125.804	0.375	0	0.374	0	0.345	0.349	0.308	0.309	0.211	0.203	0.128	0.122	0.051	0.052
126.004	0.369	0	0.376	0	0.341	0.349	0.304	0.309	0.207	0.203	0.116	0.122	0.049	0.052
126.204	0.371	0	0.369	0	0.347	0.349	0.306	0.308	0.214	0.203	0.125	0.122	0.054	0.052
126.404	0.369	0	0.372	0	0.346	0.348	0.304	0.308	0.214	0.203	0.123	0.122	0.053	0.052
126.604	0.366	0	0.371	0	0.343	0.348	0.306	0.308	0.208	0.203	0.125	0.122	0.054	0.052
126.804	0.368	0	0.364	0	0.345	0.348	0.302	0.308	0.21	0.203	0.124	0.122	0.052	0.052
127.004	0.366	0	0.376	0	0.342	0.348	0.306	0.308	0.209	0.203	0.118	0.122	0.051	0.052
127.204	0.363	0	0.375	0	0.343	0.347	0.309	0.308	0.214	0.203	0.119	0.122	0.055	0.052
127.404	0.359	0	0.373	0	0.34	0.347	0.3	0.308	0.21	0.203	0.119	0.122	0.052	0.052
127.604	0.364	0	0.368	0	0.334	0.347	0.302	0.307	0.208	0.203	0.12	0.122	0.054	0.052
127.804	0.359	0	0.366	0	0.336	0.347	0.302	0.307	0.2	0.203	0.117	0.122	0.044	0.052
128.004	0.364	0	0.368	0	0.339	0.346	0.305	0.307	0.207	0.203	0.121	0.122	0.053	0.052
128.204	0.365	0	0.366	0	0.342	0.346	0.302	0.307	0.206	0.203	0.122	0.122	0.053	0.052
128.404	0.358	0	0.364	0	0.331	0.346	0.3	0.307	0.201	0.203	0.114	0.122	0.046	0.052
128.604	0.37	0	0.373	0	0.346	0.346	0.308	0.307	0.21	0.203	0.129	0.122	0.056	0.052
128.804	0.367	0	0.369	0	0.339	0.346	0.301	0.307	0.212	0.203	0.122	0.122	0.054	0.052
129.004	0.361	0	0.363	0	0.339	0.345	0.3	0.307	0.204	0.203	0.12	0.122	0.05	0.052
129.204	0.367	0	0.375	0	0.339	0.345	0.307	0.306	0.214	0.203	0.128	0.122	0.057	0.052
129.404	0.363	0	0.367	0	0.334	0.345	0.301	0.306	0.208	0.203	0.121	0.122	0.045	0.052
129.604	0.364	0	0.369	0	0.336	0.345	0.305	0.306	0.21	0.203	0.127	0.122	0.05	0.052
129.804	0.359	0	0.371	0	0.336	0.344	0.301	0.306	0.205	0.203	0.116	0.122	0.054	0.052
130.004	0.366	0	0.366	0	0.336	0.344	0.307	0.306	0.205	0.203	0.124	0.122	0.053	0.052
130.204	0.361	0	0.369	0	0.337	0.344	0.305	0.306	0.209	0.203	0.127	0.122	0.05	0.052
130.404	0.364	0	0.368	0	0.338	0.344	0.309	0.306	0.213	0.203	0.124	0.122	0.054	0.052
130.604	0.365	0	0.369	0	0.342	0.344	0.304	0.306	0.208	0.203	0.127	0.122	0.055	0.052
130.804	0.357	0	0.364	0	0.337	0.343	0.304	0.305	0.208	0.203	0.123	0.122	0.05	0.052
131.004	0.362	0	0.369	0	0.34	0.343	0.305	0.305	0.212	0.203	0.128	0.122	0.055	0.052
131.204	0.356	0	0.363	0	0.337	0.343	0.301	0.305	0.206	0.203	0.122	0.122	0.055	0.052
131.404	0.363	0	0.365	0	0.334	0.343	0.304	0.305	0.212	0.203	0.124	0.122	0.058	0.052
131.604	0.365	0	0.369	0	0.339	0.343	0.302	0.305	0.209	0.203	0.123	0.122	0.06	0.052
131.804	0.36	0	0.364	0	0.339	0.342	0.3	0.305	0.205	0.203	0.117	0.122	0.05	0.052
132.004	0.355	0	0.354	0	0.337	0.342	0.295	0.305	0.203	0.203	0.119	0.122	0.049	0.052
132.204	0.36	0	0.364	0	0.34	0.342	0.31	0.305	0.212	0.203	0.122	0.122	0.06	0.052
132.404	0.36	0	0.358	0	0.335	0.342	0.304	0.304	0.213	0.203	0.121	0.122	0.049	0.052
132.604	0.356	0	0.364	0	0.333	0.342	0.303	0.304	0.211	0.203	0.119	0.122	0.051	0.052
132.804	0.355	0	0.36	0	0.331	0.341	0.298	0.304	0.209	0.203	0.121	0.122	0.046	0.052
133.004	0.362	0	0.365	0	0.339	0.341	0.303	0.304	0.215	0.203	0.125	0.122	0.054	0.052
133.204	0.357	0	0.364	0	0.33	0.341	0.296	0.304	0.206	0.203	0.118	0.122	0.049	0.052
133.404	0.357	0	0.356	0	0.332	0.341	0.296	0.304	0.204	0.203	0.12	0.122	0.051	0.052
133.604	0.354	0	0.359	0	0.334	0.341	0.302	0.304	0.204	0.203	0.12	0.122	0.056	0.052
133.804	0.358	0	0.364	0	0.339	0.34	0.304	0.304	0.205	0.203	0.124	0.122	0.053	0.052
134.004	0.358	0	0.361	0	0.333	0.34	0.306	0.303	0.21	0.203	0.118	0.122	0.051	0.052
134.204	0.358	0	0.359	0	0.335	0.34	0.301	0.303	0.209	0.203	0.12	0.122	0.053	0.052
134.404	0.356	0	0.362	0	0.336	0.34	0.301	0.303	0.208	0.203	0.122	0.122	0.054	0.052
134.604	0.36	0	0.362	0	0.333	0.34	0.298	0.303	0.209	0.203	0.119	0.122	0.052	0.052
134.804	0.353	0	0.355	0	0.336	0.339	0.297	0.303	0.207	0.203	0.115	0.122	0.049	0.052
135.004	0.35	0	0.356	0	0.333	0.339	0.297	0.303	0.204	0.203	0.114	0.122	0.047	0.052
135.204	0.353	0	0.36	0	0.334	0.339	0.299	0.303	0.214	0.203	0.128	0.122	0.052	0.052
135.404	0.357	0	0.361	0	0.337	0.339	0.3	0.303	0.209	0.203	0.125	0.122	0.054	0.052
135.604	0.358	0	0.364	0	0.337	0.339	0.303	0.303	0.205	0.203	0.129	0.122	0.058	0.052
135.804	0.346	0	0.355	0	0.331	0.339	0.293	0.302	0.201	0.203	0.119	0.122	0.045	0.052
136.004	0.351	0	0.368	0	0.333	0.338	0.298	0.302	0.206	0.203	0.12	0.122	0.05	0.052
136.204	0.353	0	0.358	0	0.331	0.338	0.297	0.302	0.204	0.203	0.117	0.122	0.047	0.052
136.404	0.357	0	0.36	0	0.334	0.338	0.301	0.302	0.208	0.203	0.119	0.122	0.051	0.052
136.604	0.353	0	0.352	0	0.328	0.338	0.298	0.302	0.201	0.203	0.118	0.122	0.046	0.052
136.804	0.356	0	0.362	0	0.341	0.338	0.3	0.302	0.215	0.203	0.128	0.122	0.057	0.052
137.004	0.352	0	0.356	0	0.333	0.337	0.294	0.302	0.202	0.203	0.121	0.122	0.051	0.052
137.204	0.353	0	0.357	0	0.334	0.337	0.301	0.302	0.206	0.203	0.118	0.122	0.055	0.052
137.404	0.35	0	0.354	0	0.332	0.337	0.298	0.302	0.201	0.203	0.119	0.122	0.05	0.052
137.604	0.353	0	0.359	0	0.327	0.337	0.296	0.301	0.206	0.203	0.12	0.122	0.05	0.052
137.804	0.356	0	0.363	0	0.335	0.337	0.301	0.301	0.212	0.203	0.126	0.122	0.054	0.052
138.004	0.351	0	0.359	0	0.331	0.337	0.298	0.301	0.208	0.203	0.118	0.122	0.054	0.052
138.204	0.354	0	0.361	0	0.334	0.336	0.302	0.301	0.208	0.203	0.122	0.122	0.055	0.052
138.404	0.356	0	0.363	0	0.336	0.336	0.303	0.301	0.211	0.203	0.127	0.122	0.057	0.052
138.604	0.352	0	0.358	0	0.331	0.336	0.304	0.301	0.208	0.203	0.124	0.122	0.052	0.052
138.804	0.353	0	0.36	0	0.335	0.336	0.3	0.301	0.208	0.203	0.119	0.122	0.049	0.052
139.004	0.351	0	0.356	0	0.334	0.336	0.301	0.301	0.207	0.203	0.122	0.122	0.05	0.052
139.204	0.359	0	0.365	0	0.335	0.336	0.299	0.301	0.209	0.203	0.126	0.122	0.055	0.052
139.404	0.358	0	0.366	0	0.334	0.335	0.307	0.301	0.211	0.203	0.127	0.122	0.059	0.052
139.604	0.352	0	0.359	0	0.328	0.335	0.295	0.3	0.211	0.203	0.123	0.122	0.051	0.052
139.804	0.354	0	0.357	0	0.331	0.335	0.299	0.3	0.207	0.203	0.124	0.122	0.055	0.052
140.004	0.353	0	0.365	0	0.335	0.335	0.306	0.3	0.209	0.203	0.128	0.122	0.059	0.052
140.204	0.349	0	0.354	0	0.325	0.335	0.296	0.3	0.2	0.203	0.115	0.122	0.051	0.052
140.404	0.353	0	0.356	0	0.328	0.335	0.298	0.3	0.209	0.203	0.12	0.122	0.052	0.052
140.604	0.349	0	0.353	0	0.333	0.334	0.301	0.3	0.205	0.203	0.121	0.122	0.055	0.052
140.804	0.343	0	0.354	0	0.326	0.334	0.29	0.3	0.202	0.202	0.123	0.122	0.048	0.052
141.004	0.353	0	0.355	0	0.33	0.334	0.297	0.3	0.203	0.202	0.124	0.121	0.049	0.052
141.204	0.349	0	0.358	0	0.329	0.334	0.296	0.3	0.209	0.202	0.122	0.121	0.053	0.052
141.404	0.353	0	0.357	0	0.335	0.334	0.3	0.3	0.209	0.202	0.122	0.121	0.055	0.052
141.604	0.351	0	0.362	0	0.326	0.334	0.299	0.299	0.203	0.202	0.123	0.121	0.047	0.052
141.804	0.347	0	0.349	0	0.321	0.333	0.294	0.299	0.203	0.202	0.117	0.121	0.048	0.052
142.004	0.348	0	0.36	0	0.332	0.333	0.299	0.299	0.211	0.202	0.12	0.121	0.049	0.052
142.204	0.346	0	0.353	0	0.33	0.333	0.295	0.299	0.205	0.202	0.118	0.121	0.05	0.052
142.404	0.346	0	0.35	0	0.323	0.333	0.293	0.299	0.201	0.202	0.114	0.121	0.05	0.052
142.604	0.347	0	0.349	0	0.326	0.333	0.289	0.299	0.199	0.202	0.121	0.121	0.052	0.052
142.804	0.351	0	0.361	0	0.325	0.333	0.3	0.299	0.208	0.202	0.122	0.121	0.056	0.052
143.004	0.353	0	0.357	0	0.33	0.333	0.294	0.299	0.202	0.202	0.119	0.121	0.054	0.052
143.204	0.351	0	0.357	0	0.333	0.332	0.298	0.299	0.207	0.202	0.123	0.121	0.052	0.052
143.404	0.351	0	0.361	0	0.334	0.332	0.297	0.299	0.21	0.202	0.126	0.121	0.056	0.052
143.604	0.349	0	0.355	0	0.33	0.332	0.295	0.298	0.204	0.202	0.122	0.121	0.051	0.052
143.804	0.349	0	0.353	0	0.328	0.332	0.295	0.298	0.211	0.202	0.119	0.121	0.051	0.052
144.004	0.35	0	0.359	0	0.326	0.332	0.297	0.298	0.204	0.202	0.123	0.121	0.054	0.052
144.204	0.355	0	0.356	0	0.328	0.332	0.295	0.298	0.208	0.202	0.122	0.121	0.053	0.052
144.404	0.347	0	0.351	0	0.333	0.331	0.293	0.298	0.206	0.202	0.121	0.121	0.049	0.052
144.604	0.344	0	0.352	0	0.325	0.331	0.293	0.298	0.199	0.202	0.126	0.121	0.049	0.052
144.804	0.341	0	0.353	0	0.325	0.331	0.291	0.298	0.195	0.202	0.124	0.121	0.053	0.052
145.004	0.348	0	0.357	0	0.333	0.331	0.297	0.298	0.207	0.202	0.122	0.121	0.057	0.052
145.204	0.346	0	0.351	0	0.332	0.331	0.291	0.298	0.21	0.202	0.118	0.121	0.045	0.052
145.404	0.35	0	0.346	0	0.323	0.331	0.291	0.298	0.2	0.202	0.119	0.121	0.046	0.052
145.604	0.349	0	0.358	0	0.328	0.331	0.297	0.298	0.204	0.202	0.117	0.121	0.052	0.052
145.804	0.348	0	0.349	0	0.324	0.33	0.3	0.298	0.2	0.202	0.118	0.121	0.048	0.052
146.004	0.346	0	0.348	0	0.325	0.33	0.29	0.297	0.2	0.202	0.116	0.121	0.047	0.052
146.204	0.353	0	0.352	0	0.334	0.33	0.296	0.297	0.209	0.202	0.121	0.121	0.053	0.052
146.404	0.342	0	0.349	0	0.325	0.33	0.292	0.297	0.204	0.202	0.118	0.121	0.049	0.052
146.604	0.346	0	0.352	0	0.327	0.33	0.293	0.297	0.202	0.202	0.123	0.121	0.052	0.052
146.804	0.346	0	0.355	0	0.327	0.33	0.299	0.297	0.204	0.202	0.123	0.121	0.051	0.052
147.004	0.353	0	0.36	0	0.33	0.33	0.296	0.297	0.206	0.202	0.123	0.121	0.059	0.052
147.204	0.347	0	0.351	0	0.327	0.33	0.294	0.297	0.202	0.202	0.119	0.121	0.047	0.052
147.404	0.349	0	0.349	0	0.33	0.329	0.299	0.297	0.207	0.202	0.12	0.121	0.052	0.052
147.604	0.346	0	0.348	0	0.327	0.329	0.297	0.297	0.205	0.202	0.12	0.121	0.048	0.052
147.804	0.349	0	0.352	0	0.332	0.329	0.295	0.297	0.208	0.202	0.125	0.121	0.05	0.052
148.004	0.346	0	0.354	0	0.324	0.329	0.291	0.297	0.203	0.202	0.116	0.121	0.048	0.052
148.204	0.344	0	0.35	0	0.323	0.329	0.293	0.296	0.202	0.202	0.118	0.121	0.05	0.052
148.404	0.352	0	0.359	0	0.326	0.329	0.3	0.296	0.207	0.202	0.122	0.121	0.055	0.052
148.604	0.35	0	0.355	0	0.33	0.329	0.292	0.296	0.21	0.202	0.124	0.121	0.052	0.052
148.804	0.35	0	0.352	0	0.331	0.328	0.299	0.296	0.209	0.202	0.127	0.121	0.057	0.052
149.004	0.345	0	0.347	0	0.331	0.328	0.294	0.296	0.205	0.202	0.12	0.121	0.05	0.052
149.204	0.348	0	0.353	0	0.325	0.328	0.3	0.296	0.21	0.202	0.123	0.121	0.053	0.052
149.404	0.343	0	0.351	0	0.33	0.328	0.294	0.296	0.207	0.202	0.123	0.121	0.053	0.052
149.604	0.344	0	0.353	0	0.329	0.328	0.294	0.296	0.199	0.202	0.117	0.121	0.054	0.052
149.804	0.336	0	0.348	0	0.325	0.328	0.29	0.296	0.196	0.202	0.119	0.121	0.046	0.052
150.004	0.346	0	0.349	0	0.326	0.328	0.283	0.296	0.206	0.202	0.118	0.121	0.051	0.052
150.204	0.339	0	0.349	0	0.323	0.328	0.291	0.296	0.203	0.202	0.12	0.121	0.052	0.052
150.404	0.347	0	0.353	0	0.325	0.327	0.3	0.296	0.211	0.202	0.124	0.121	0.055	0.052
150.604	0.348	0	0.355	0	0.323	0.327	0.293	0.296	0.204	0.202	0.114	0.121	0.048	0.052
150.804	0.351	0	0.356	0	0.332	0.327	0.3	0.295	0.212	0.202	0.12	0.121	0.051	0.052
151.004	0.347	0	0.353	0	0.332	0.327	0.299	0.295	0.206	0.202	0.124	0.121	0.052	0.052
151.204	0.342	0	0.349	0	0.321	0.327	0.292	0.295	0.203	0.202	0.123	0.121	0.054	0.052
151.404	0.344	0	0.35	0	0.324	0.327	0.293	0.295	0.2	0.202	0.121	0.121	0.055	0.052
151.604	0.352	0	0.36	0	0.331	0.327	0.303	0.295	0.209	0.202	0.128	0.121	0.055	0.052
151.804	0.349	0	0.353	0	0.324	0.327	0.294	0.295	0.2	0.202	0.122	0.121	0.05	0.052
152.004	0.347	0	0.351	0	0.325	0.326	0.297	0.295	0.204	0.202	0.12	0.121	0.051	0.052
152.204	0.344	0	0.35	0	0.322	0.326	0.29	0.295	0.201	0.202	0.116	0.121	0.045	0.052
152.404	0.348	0	0.351	0	0.331	0.326	0.294	0.295	0.206	0.202	0.125	0.121	0.053	0.052
152.604	0.346	0	0.351	0	0.328	0.326	0.291	0.295	0.201	0.202	0.122	0.121	0.055	0.052
152.804	0.342	0	0.352	0	0.323	0.326	0.29	0.295	0.204	0.202	0.121	0.121	0.053	0.052
153.004	0.348	0	0.357	0	0.329	0.326	0.302	0.295	0.21	0.202	0.127	0.121	0.06	0.052
153.204	0.349	0	0.351	0	0.325	0.326	0.298	0.295	0.21	0.202	0.126	0.121	0.06	0.052
153.404	0.345	0	0.35	0	0.325	0.326	0.295	0.294	0.207	0.202	0.12	0.121	0.049	0.052
153.604	0.347	0	0.353	0	0.33	0.325	0.299	0.294	0.208	0.202	0.123	0.121	0.051	0.052
153.804	0.346	0	0.349	0	0.321	0.325	0.299	0.294	0.208	0.202	0.121	0.121	0.05	0.052
154.004	0.344	0	0.347	0	0.321	0.325	0.292	0.294	0.202	0.202	0.12	0.121	0.049	0.052
154.204	0.344	0	0.349	0	0.326	0.325	0.293	0.294	0.204	0.202	0.121	0.121	0.048	0.052
154.404	0.337	0	0.345	0	0.326	0.325	0.292	0.294	0.208	0.202	0.125	0.121	0.051	0.052
154.604	0.343	0	0.346	0	0.325	0.325	0.298	0.294	0.206	0.202	0.127	0.121	0.05	0.052
154.804	0.34	0	0.344	0	0.324	0.325	0.288	0.294	0.198	0.202	0.118	0.121	0.046	0.052
155.004	0.338	0	0.344	0	0.319	0.325	0.288	0.294	0.196	0.202	0.112	0.121	0.045	0.052
155.204	0.34	0	0.352	0	0.324	0.325	0.292	0.294	0.202	0.202	0.125	0.121	0.052	0.052
155.404	0.343	0	0.348	0	0.322	0.324	0.286	0.294	0.202	0.202	0.12	0.121	0.049	0.052
155.604	0.346	0	0.352	0	0.323	0.324	0.294	0.294	0.207	0.202	0.124	0.121	0.052	0.052
155.804	0.347	0	0.347	0	0.323	0.324	0.29	0.294	0.204	0.202	0.12	0.121	0.049	0.052
156.004	0.34	0	0.351	0	0.319	0.324	0.285	0.294	0.203	0.202	0.122	0.121	0.046	0.052
156.204	0.346	0	0.348	0	0.332	0.324	0.296	0.293	0.208	0.202	0.118	0.121	0.05	0.052
156.404	0.345	0	0.349	0	0.326	0.324	0.295	0.293	0.203	0.202	0.12	0.121	0.054	0.052
156.604	0.336	0	0.351	0	0.319	0.324	0.288	0.293	0.198	0.202	0.113	0.121	0.052	0.052
156.804	0.339	0	0.345	0	0.322	0.324	0.291	0.293	0.203	0.202	0.116	0.121	0.05	0.052
157.004	0.345	0	0.35	0	0.324	0.324	0.293	0.293	0.21	0.202	0.123	0.121	0.06	0.052
157.204	0.341	0	0.346	0	0.321	0.324	0.29	0.293	0.199	0.202	0.117	0.121	0.048	0.052
157.404	0.344	0	0.356	0	0.331	0.323	0.305	0.293	0.206	0.201	0.125	0.121	0.057	0.052
157.604	0.339	0	0.348	0	0.323	0.323	0.297	0.293	0.205	0.201	0.119	0.121	0.054	0.052
157.804	0.346	0	0.348	0	0.321	0.323	0.292	0.293	0.207	0.201	0.123	0.121	0.051	0.052
158.004	0.348	0	0.35	0	0.331	0.323	0.297	0.293	0.207	0.201	0.124	0.121	0.058	0.052
158.204	0.337	0	0.342	0	0.322	0.323	0.292	0.293	0.2	0.201	0.12	0.121	0.05	0.052
158.404	0.338	0	0.346	0	0.322	0.323	0.295	0.293	0.202	0.201	0.125	0.121	0.053	0.052
158.604	0.339	0	0.352	0	0.329	0.323	0.297	0.293	0.205	0.201	0.12	0.121	0.054	0.052
158.804	0.344	0	0.344	0	0.321	0.323	0.292	0.293	0.199	0.201	0.119	0.121	0.048	0.052
159.004	0.339	0	0.343	0	0.324	0.323	0.289	0.293	0.201	0.201	0.114	0.121	0.054	0.052
159.204	0.337	0	0.345	0	0.318	0.322	0.289	0.292	0.199	0.201	0.116	0.121	0.047	0.052
159.404	0.338	0	0.343	0	0.321	0.322	0.291	0.292	0.201	0.201	0.118	0.121	0.048	0.052
159.604	0.346	0	0.351	0	0.325	0.322	0.295	0.292	0.209	0.201	0.125	0.121	0.053	0.052
159.804	0.344	0	0.351	0	0.326	0.322	0.29	0.292	0.208	0.201	0.127	0.121	0.052	0.052
160.004	0.342	0	0.348	0	0.32	0.322	0.291	0.292	0.205	0.201	0.125	0.121	0.055	0.052
160.204	0.343	0	0.352	0	0.323	0.322	0.296	0.292	0.209	0.201	0.126	0.121	0.057	0.052
160.404	0.341	0	0.345	0	0.326	0.322	0.291	0.292	0.207	0.201	0.121	0.121	0.054	0.052
160.604	0.343	0	0.352	0	0.328	0.322	0.294	0.292	0.207	0.201	0.117	0.121	0.057	0.052
160.804	0.343	0	0.344	0	0.322	0.322	0.291	0.292	0.195	0.201	0.116	0.121	0.049	0.052
161.004	0.343	0	0.344	0	0.324	0.322	0.292	0.292	0.2	0.201	0.122	0.121	0.052	0.052
161.204	0.345	0	0.356	0	0.325	0.321	0.294	0.292	0.206	0.201	0.122	0.121	0.06	0.052
161.404	0.342	0	0.349	0	0.327	0.321	0.291	0.292	0.207	0.201	0.121	0.121	0.05	0.052
161.604	0.334	0	0.339	0	0.316	0.321	0.287	0.292	0.204	0.201	0.119	0.121	0.052	0.052
161.804	0.343	0	0.342	0	0.319	0.321	0.29	0.292	0.204	0.201	0.126	0.121	0.05	0.052
162.004	0.344	0	0.345	0	0.324	0.321	0.292	0.292	0.205	0.201	0.12	0.121	0.054	0.052
162.204	0.345	0	0.351	0	0.323	0.321	0.293	0.292	0.205	0.201	0.126	0.121	0.056	0.052
162.404	0.344	0	0.352	0	0.322	0.321	0.295	0.292	0.209	0.201	0.123	0.121	0.054	0.052
162.604	0.34	0	0.347	0	0.322	0.321	0.291	0.291	0.203	0.201	0.118	0.121	0.052	0.052
162.804	0.343	0	0.345	0	0.324	0.321	0.297	0.291	0.202	0.201	0.122	0.121	0.051	0.052
163.004	0.343	0	0.348	0	0.325	0.321	0.292	0.291	0.201	0.201	0.121	0.121	0.054	0.052
163.204	0.344	0	0.35	0	0.326	0.321	0.294	0.291	0.207	0.201	0.125	0.121	0.059	0.052
163.404	0.339	0	0.345	0	0.32	0.32	0.294	0.291	0.204	0.201	0.119	0.121	0.055	0.052
163.604	0.343	0	0.349	0	0.322	0.32	0.289	0.291	0.206	0.201	0.121	0.121	0.052	0.052
163.804	0.337	0	0.341	0	0.318	0.32	0.286	0.291	0.197	0.201	0.117	0.121	0.056	0.052
164.004	0.342	0	0.347	0	0.318	0.32	0.293	0.291	0.209	0.201	0.122	0.121	0.053	0.052
164.204	0.338	0	0.344	0	0.318	0.32	0.292	0.291	0.205	0.201	0.122	0.121	0.054	0.052
164.404	0.334	0	0.346	0	0.321	0.32	0.292	0.291	0.202	0.201	0.123	0.121	0.052	0.052
164.604	0.334	0	0.346	0	0.321	0.32	0.289	0.291	0.202	0.201	0.117	0.121	0.05	0.052
164.804	0.344	0	0.353	0	0.327	0.32	0.296	0.291	0.207	0.201	0.12	0.121	0.058	0.052
165.004	0.337	0	0.341	0	0.316	0.32	0.288	0.291	0.2	0.201	0.117	0.121	0.05	0.052
165.204	0.336	0	0.345	0	0.318	0.32	0.291	0.291	0.2	0.201	0.118	0.121	0.051	0.052
165.404	0.333	0	0.337	0	0.318	0.32	0.284	0.291	0.199	0.201	0.116	0.121	0.047	0.052
165.604	0.336	0	0.34	0	0.315	0.319	0.285	0.291	0.198	0.201	0.115	0.121	0.047	0.052
165.804	0.338	0	0.347	0	0.317	0.319	0.29	0.291	0.2	0.201	0.118	0.121	0.054	0.052
166.004	0.336	0	0.341	0	0.315	0.319	0.287	0.29	0.205	0.201	0.118	0.121	0.046	0.052
166.204	0.334	0	0.343	0	0.321	0.319	0.292	0.29	0.201	0.201	0.116	0.121	0.048	0.052
166.404	0.339	0	0.344	0	0.315	0.319	0.291	0.29	0.201	0.201	0.124	0.121	0.053	0.052
166.604	0.338	0	0.345	0	0.318	0.319	0.291	0.29	0.2	0.201	0.121	0.121	0.051	0.052
166.804	0.334	0	0.348	0	0.318	0.319	0.289	0.29	0.205	0.201	0.121	0.121	0.052	0.052
167.004	0.34	0	0.34	0	0.325	0.319	0.288	0.29	0.204	0.201	0.127	0.121	0.049	0.052
167.204	0.339	0	0.343	0	0.321	0.319	0.286	0.29	0.202	0.201	0.122	0.121	0.055	0.052
167.404	0.333	0	0.344	0	0.323	0.319	0.29	0.29	0.201	0.201	0.12	0.121	0.05	0.052
167.604	0.335	0	0.345	0	0.321	0.319	0.288	0.29	0.203	0.201	0.119	0.121	0.051	0.052
167.804	0.34	0	0.344	0	0.324	0.319	0.287	0.29	0.205	0.201	0.122	0.121	0.055	0.052
168.004	0.338	0	0.342	0	0.321	0.318	0.288	0.29	0.205	0.201	0.12	0.121	0.049	0.052
168.204	0.335	0	0.344	0	0.319	0.318	0.292	0.29	0.204	0.201	0.116	0.121	0.049	0.052
168.404	0.333	0	0.341	0	0.317	0.318	0.287	0.29	0.2	0.201	0.119	0.121	0.05	0.052
168.604	0.34	0	0.35	0	0.324	0.318	0.29	0.29	0.205	0.201	0.124	0.12	0.051	0.052
168.804	0.335	0	0.343	0	0.319	0.318	0.295	0.29	0.208	0.201	0.119	0.12	0.05	0.052
169.004	0.338	0	0.344	0	0.313	0.318	0.286	0.29	0.204	0.201	0.116	0.12	0.057	0.052
169.204	0.335	0	0.342	0	0.318	0.318	0.287	0.29	0.202	0.201	0.117	0.12	0.05	0.052
169.404	0.338	0	0.343	0	0.321	0.318	0.29	0.29	0.201	0.201	0.117	0.12	0.051	0.052
169.604	0.333	0	0.35	0	0.321	0.318	0.295	0.29	0.202	0.201	0.122	0.12	0.054	0.052
169.804	0.34	0	0.342	0	0.323	0.318	0.29	0.289	0.202	0.201	0.123	0.12	0.052	0.052
170.004	0.338	0	0.343	0	0.318	0.318	0.291	0.289	0.202	0.201	0.119	0.12	0.05	0.052
170.204	0.339	0	0.345	0	0.325	0.318	0.293	0.289	0.204	0.201	0.121	0.12	0.054	0.052
170.404	0.338	0	0.343	0	0.314	0.318	0.286	0.289	0.202	0.201	0.117	0.12	0.053	0.052
170.604	0.338	0	0.345	0	0.318	0.317	0.29	0.289	0.197	0.201	0.113	0.12	0.047	0.052
170.804	0.335	0	0.34	0	0.318	0.317	0.286	0.289	0.2	0.201	0.118	0.12	0.052	0.052
171.004	0.338	0	0.342	0	0.317	0.317	0.291	0.289	0.205	0.201	0.124	0.12	0.055	0.052
171.204	0.335	0	0.344	0	0.314	0.317	0.287	0.289	0.199	0.201	0.115	0.12	0.046	0.052
171.404	0.332	0	0.342	0	0.317	0.317	0.29	0.289	0.2	0.201	0.12	0.12	0.053	0.052
171.604	0.336	0	0.342	0	0.314	0.317	0.288	0.289	0.202	0.201	0.118	0.12	0.053	0.052
171.804	0.335	0	0.342	0	0.314	0.317	0.282	0.289	0.203	0.201	0.117	0.12	0.05	0.052
172.004	0.337	0	0.346	0	0.323	0.317	0.29	0.289	0.207	0.201	0.12	0.12	0.051	0.052
172.204	0.337	0	0.341	0	0.32	0.317	0.289	0.289	0.205	0.201	0.122	0.12	0.052	0.052
172.404	0.335	0	0.342	0	0.319	0.317	0.287	0.289	0.205	0.201	0.121	0.12	0.053	0.052
172.604	0.335	0	0.343	0	0.313	0.317	0.288	0.289	0.199	0.201	0.114	0.12	0.052	0.052
172.804	0.336	0	0.343	0	0.319	0.317	0.292	0.289	0.201	0.201	0.122	0.12	0.052	0.052
173.004	0.331	0	0.333	0	0.314	0.317	0.286	0.289	0.199	0.201	0.122	0.12	0.05	0.052
173.204	0.331	0	0.331	0	0.316	0.316	0.283	0.289	0.196	0.201	0.118	0.12	0.045	0.052
173.404	0.335	0	0.343	0	0.319	0.316	0.289	0.289	0.2	0.201	0.127	0.12	0.051	0.052
173.604	0.341	0	0.338	0	0.319	0.316	0.291	0.289	0.206	0.201	0.121	0.12	0.053	0.052
173.804	0.335	0	0.348	0	0.327	0.316	0.294	0.288	0.203	0.201	0.122	0.12	0.052	0.052
174.004	0.337	0	0.341	0	0.315	0.316	0.286	0.288	0.199	0.2	0.12	0.12	0.048	0.052
174.204	0.33	0	0.34	0	0.317	0.316	0.285	0.288	0.198	0.2	0.121	0.12	0.049	0.052
174.404	0.336	0	0.34	0	0.319	0.316	0.282	0.288	0.201	0.2	0.119	0.12	0.051	0.052
174.604	0.337	0	0.344	0	0.324	0.316	0.294	0.288	0.208	0.2	0.125	0.12	0.052	0.052
174.804	0.336	0	0.344	0	0.31	0.316	0.291	0.288	0.195	0.2	0.118	0.12	0.05	0.052
175.004	0.336	0	0.34	0	0.318	0.316	0.287	0.288	0.201	0.2	0.126	0.12	0.056	0.052
175.204	0.329	0	0.336	0	0.319	0.316	0.286	0.288	0.197	0.2	0.114	0.12	0.052	0.052
175.404	0.333	0	0.339	0	0.313	0.316	0.281	0.288	0.199	0.2	0.118	0.12	0.048	0.052
175.604	0.336	0	0.339	0	0.316	0.316	0.285	0.288	0.197	0.2	0.116	0.12	0.046	0.052
175.804	0.331	0	0.336	0	0.313	0.316	0.284	0.288	0.196	0.2	0.12	0.12	0.046	0.052
176.004	0.329	0	0.342	0	0.317	0.315	0.29	0.288	0.201	0.2	0.121	0.12	0.051	0.052
176.204	0.34	0	0.344	0	0.316	0.315	0.295	0.288	0.202	0.2	0.126	0.12	0.048	0.052
176.404	0.335	0	0.341	0	0.317	0.315	0.284	0.288	0.197	0.2	0.116	0.12	0.048	0.051
176.604	0.342	0	0.34	0	0.318	0.315	0.288	0.288	0.209	0.2	0.12	0.12	0.056	0.051
176.804	0.328	0	0.336	0	0.318	0.315	0.282	0.288	0.201	0.2	0.117	0.12	0.049	0.051
177.004	0.329	0	0.338	0	0.312	0.315	0.285	0.288	0.199	0.2	0.115	0.12	0.048	0.051
177.204	0.333	0	0.341	0	0.317	0.315	0.288	0.288	0.203	0.2	0.122	0.12	0.049	0.051
177.404	0.337	0	0.343	0	0.319	0.315	0.287	0.288	0.198	0.2	0.124	0.12	0.053	0.051
177.604	0.334	0	0.336	0	0.319	0.315	0.291	0.288	0.198	0.2	0.117	0.12	0.051	0.051
177.804	0.329	0	0.345	0	0.315	0.315	0.283	0.288	0.199	0.2	0.12	0.12	0.056	0.051
178.004	0.336	0	0.341	0	0.317	0.315	0.287	0.288	0.204	0.2	0.121	0.12	0.055	0.051
178.204	0.338	0	0.34	0	0.317	0.315	0.292	0.287	0.199	0.2	0.117	0.12	0.048	0.051
178.404	0.334	0	0.334	0	0.313	0.315	0.287	0.287	0.199	0.2	0.11	0.12	0.044	0.051
178.604	0.329	0	0.34	0	0.316	0.315	0.284	0.287	0.196	0.2	0.114	0.12	0.047	0.051
178.804	0.334	0	0.337	0	0.314	0.315	0.288	0.287	0.2	0.2	0.116	0.12	0.049	0.051
179.004	0.339	0	0.343	0	0.321	0.314	0.29	0.287	0.204	0.2	0.124	0.12	0.058	0.051
179.204	0.33	0	0.332	0	0.315	0.314	0.285	0.287	0.203	0.2	0.116	0.12	0.049	0.051
179.404	0.332	0	0.34	0	0.315	0.314	0.285	0.287	0.2	0.2	0.115	0.12	0.054	0.051
179.604	0.332	0	0.336	0	0.317	0.314	0.285	0.287	0.197	0.2	0.117	0.12	0.048	0.051
179.804	0.328	0	0.34	0	0.313	0.314	0.287	0.287	0.2	0.2	0.12	0.12	0.053	0.051
180.004	0.336	0	0.341	0	0.32	0.314	0.286	0.287	0.206	0.2	0.123	0.12	0.05	0.051
180.204	0.338	0	0.34	0	0.324	0.314	0.288	0.287	0.203	0.2	0.119	0.12	0.053	0.051
180.404	0.336	0	0.344	0	0.321	0.314	0.289	0.287	0.202	0.2	0.126	0.12	0.053	0.051
180.604	0.33	0	0.333	0	0.316	0.314	0.282	0.287	0.201	0.2	0.119	0.12	0.052	0.051
180.804	0.338	0	0.339	0	0.319	0.314	0.289	0.287	0.201	0.2	0.118	0.12	0.056	0.051
181.004	0.334	0	0.337	0	0.316	0.314	0.285	0.287	0.202	0.2	0.115	0.12	0.05	0.051
181.204	0.328	0	0.337	0	0.309	0.314	0.28	0.287	0.197	0.2	0.114	0.12	0.046	0.051
181.404	0.333	0	0.34	0	0.317	0.314	0.287	0.287	0.202	0.2	0.123	0.12	0.053	0.051
181.604	0.329	0	0.339	0	0.314	0.314	0.285	0.287	0.196	0.2	0.114	0.12	0.047	0.051
181.804	0.329	0	0.334	0	0.305	0.314	0.279	0.287	0.196	0.2	0.118	0.12	0.049	0.051
182.004	0.335	0	0.338	0	0.317	0.314	0.283	0.287	0.198	0.2	0.122	0.12	0.051	0.051
182.204	0.329	0	0.338	0	0.312	0.314	0.283	0.287	0.198	0.2	0.118	0.12	0.049	0.051
182.404	0.331	0	0.339	0	0.312	0.313	0.284	0.287	0.195	0.2	0.122	0.12	0.049	0.051
182.604	0.33	0	0.333	0	0.316	0.313	0.282	0.287	0.197	0.2	0.12	0.12	0.047	0.051
182.804	0.329	0	0.338	0	0.32	0.313	0.283	0.287	0.199	0.2	0.122	0.12	0.049	0.051
183.004	0.332	0	0.342	0	0.317	0.313	0.288	0.286	0.2	0.2	0.114	0.12	0.057	0.051
183.204	0.332	0	0.338	0	0.308	0.313	0.284	0.286	0.199	0.2	0.118	0.12	0.051	0.051
183.404	0.33	0	0.34	0	0.314	0.313	0.286	0.286	0.2	0.2	0.123	0.12	0.052	0.051
183.604	0.329	0	0.336	0	0.315	0.313	0.284	0.286	0.198	0.2	0.118	0.12	0.051	0.051
183.804	0.327	0	0.334	0	0.309	0.313	0.278	0.286	0.194	0.2	0.114	0.12	0.047	0.051
184.004	0.332	0	0.341	0	0.322	0.313	0.293	0.286	0.201	0.2	0.121	0.12	0.055	0.051
184.204	0.333	0	0.336	0	0.315	0.313	0.282	0.286	0.201	0.2	0.118	0.12	0.05	0.051
184.404	0.337	0	0.344	0	0.32	0.313	0.288	0.286	0.203	0.2	0.12	0.12	0.06	0.051
184.604	0.33	0	0.338	0	0.311	0.313	0.283	0.286	0.198	0.2	0.115	0.12	0.048	0.051
184.804	0.328	0	0.333	0	0.308	0.313	0.283	0.286	0.195	0.2	0.117	0.12	0.044	0.051
185.004	0.335	0	0.339	0	0.316	0.313	0.288	0.286	0.202	0.2	0.119	0.12	0.051	0.051
185.204	0.328	0	0.339	0	0.315	0.313	0.286	0.286	0.196	0.2	0.118	0.12	0.057	0.051
185.404	0.329	0	0.335	0	0.314	0.313	0.284	0.286	0.194	0.2	0.118	0.12	0.049	0.051
185.604	0.334	0	0.334	0	0.315	0.313	0.279	0.286	0.202	0.2	0.121	0.12	0.054	0.051
185.804	0.328	0	0.337	0	0.313	0.312	0.284	0.286	0.197	0.2	0.119	0.12	0.052	0.051
186.004	0.338	0	0.341	0	0.319	0.312	0.29	0.286	0.197	0.2	0.121	0.12	0.057	0.051
186.204	0.331	0	0.339	0	0.313	0.312	0.283	0.286	0.203	0.2	0.116	0.12	0.051	0.051
186.404	0.338	0	0.344	0	0.318	0.312	0.287	0.286	0.202	0.2	0.123	0.12	0.053	0.051
186.604	0.334	0	0.344	0	0.314	0.312	0.285	0.286	0.201	0.2	0.122	0.12	0.053	0.051
186.804	0.33	0	0.336	0	0.315	0.312	0.286	0.286	0.198	0.2	0.12	0.12	0.05	0.051
187.004	0.328	0	0.333	0	0.312	0.312	0.282	0.286	0.197	0.2	0.118	0.12	0.054	0.051
187.204	0.328	0	0.338	0	0.318	0.312	0.284	0.286	0.204	0.2	0.122	0.12	0.053	0.051
187.404	0.328	0	0.339	0	0.31	0.312	0.283	0.286	0.202	0.2	0.116	0.12	0.046	0.051
187.604	0.327	0	0.341	0	0.309	0.312	0.284	0.286	0.2	0.2	0.118	0.12	0.053	0.051
187.804	0.335	0	0.34	0	0.316	0.312	0.288	0.286	0.203	0.2	0.123	0.12	0.053	0.051
188.004	0.325	0	0.335	0	0.315	0.312	0.286	0.286	0.199	0.2	0.117	0.12	0.053	0.051
188.204	0.327	0	0.334	0	0.307	0.312	0.28	0.285	0.197	0.2	0.111	0.12	0.043	0.051
188.404	0.328	0	0.338	0	0.315	0.312	0.285	0.285	0.2	0.2	0.122	0.12	0.057	0.051
188.604	0.331	0	0.34	0	0.316	0.312	0.291	0.285	0.201	0.2	0.118	0.12	0.051	0.051
188.804	0.336	0	0.347	0	0.319	0.312	0.29	0.285	0.204	0.2	0.12	0.12	0.054	0.051
189.004	0.329	0	0.339	0	0.317	0.312	0.287	0.285	0.202	0.2	0.126	0.12	0.056	0.051
189.204	0.331	0	0.34	0	0.313	0.312	0.284	0.285	0.204	0.2	0.118	0.12	0.05	0.051
189.404	0.337	0	0.344	0	0.325	0.311	0.291	0.285	0.205	0.2	0.13	0.12	0.058	0.051
189.604	0.322	0	0.334	0	0.317	0.311	0.284	0.285	0.196	0.2	0.12	0.12	0.049	0.051
189.804	0.329	0	0.332	0	0.313	0.311	0.278	0.285	0.199	0.2	0.116	0.12	0.05	0.051
190.004	0.331	0	0.333	0	0.314	0.311	0.282	0.285	0.201	0.2	0.113	0.12	0.048	0.051
190.204	0.329	0	0.336	0	0.316	0.311	0.29	0.285	0.205	0.2	0.122	0.12	0.051	0.051
190.404	0.331	0	0.341	0	0.312	0.311	0.287	0.285	0.198	0.2	0.12	0.12	0.054	0.051
190.604	0.329	0	0.336	0	0.315	0.311	0.286	0.285	0.202	0.2	0.117	0.12	0.051	0.051
190.804	0.33	0	0.338	0	0.313	0.311	0.287	0.285	0.2	0.199	0.122	0.12	0.049	0.051
191.004	0.335	0	0.331	0	0.316	0.311	0.285	0.285	0.201	0.199	0.124	0.12	0.056	0.051
191.204	0.334	0	0.339	0	0.32	0.311	0.288	0.285	0.202	0.199	0.12	0.12	0.053	0.051
191.404	0.326	0	0.33	0	0.314	0.311	0.285	0.285	0.197	0.199	0.116	0.12	0.047	0.051
191.604	0.329	0	0.333	0	0.312	0.311	0.283	0.285	0.202	0.199	0.118	0.12	0.043	0.051
191.804	0.329	0	0.334	0	0.311	0.311	0.285	0.285	0.203	0.199	0.118	0.12	0.052	0.051
192.004	0.334	0	0.34	0	0.315	0.311	0.286	0.285	0.206	0.199	0.124	0.12	0.052	0.051
192.204	0.325	0	0.342	0	0.315	0.311	0.284	0.285	0.196	0.199	0.118	0.12	0.045	0.051
192.404	0.33	0	0.334	0	0.315	0.311	0.28	0.285	0.202	0.199	0.119	0.12	0.049	0.051
192.604	0.326	0	0.329	0	0.31	0.311	0.286	0.285	0.2	0.199	0.118	0.12	0.054	0.051
192.804	0.335	0	0.34	0	0.319	0.311	0.289	0.285	0.201	0.199	0.122	0.12	0.056	0.051
193.004	0.329	0	0.334	0	0.314	0.311	0.288	0.285	0.198	0.199	0.121	0.12	0.053	0.051
193.204	0.329	0	0.325	0	0.31	0.311	0.281	0.285	0.199	0.199	0.116	0.12	0.048	0.051
193.404	0.328	0	0.332	0	0.309	0.31	0.283	0.285	0.197	0.199	0.115	0.12	0.047	0.051
193.604	0.33	0	0.335	0	0.317	0.31	0.286	0.285	0.202	0.199	0.118	0.12	0.054	0.051
193.804	0.328	0	0.334	0	0.312	0.31	0.282	0.284	0.197	0.199	0.117	0.12	0.051	0.051
194.004	0.327	0	0.336	0	0.307	0.31	0.288	0.284	0.2	0.199	0.12	0.12	0.052	0.051
194.204	0.332	0	0.333	0	0.314	0.31	0.289	0.284	0.201	0.199	0.126	0.12	0.056	0.051
194.404	0.326	0	0.338	0	0.309	0.31	0.287	0.284	0.196	0.199	0.119	0.12	0.049	0.051
194.604	0.331	0	0.336	0	0.315	0.31	0.292	0.284	0.201	0.199	0.125	0.12	0.054	0.051
194.804	0.334	0	0.333	0	0.314	0.31	0.285	0.284	0.202	0.199	0.119	0.12	0.05	0.051
195.004	0.326	0	0.337	0	0.31	0.31	0.285	0.284	0.2	0.199	0.124	0.12	0.05	0.051
195.204	0.322	0	0.334	0	0.307	0.31	0.281	0.284	0.193	0.199	0.119	0.12	0.052	0.051
195.404	0.332	0	0.338	0	0.316	0.31	0.292	0.284	0.204	0.199	0.121	0.12	0.055	0.051
195.604	0.325	0	0.33	0	0.311	0.31	0.286	0.284	0.204	0.199	0.119	0.12	0.048	0.051
195.804	0.33	0	0.329	0	0.31	0.31	0.281	0.284	0.205	0.199	0.116	0.12	0.049	0.051
196.004	0.327	0	0.334	0	0.313	0.31	0.281	0.284	0.202	0.199	0.117	0.12	0.048	0.051
196.204	0.325	0	0.333	0	0.315	0.31	0.288	0.284	0.201	0.199	0.122	0.12	0.056	0.051
196.404	0.33	0	0.335	0	0.315	0.31	0.285	0.284	0.197	0.199	0.116	0.119	0.05	0.051
196.604	0.33	0	0.336	0	0.311	0.31	0.282	0.284	0.197	0.199	0.118	0.119	0.05	0.051
196.804	0.327	0	0.338	0	0.311	0.31	0.286	0.284	0.197	0.199	0.123	0.119	0.058	0.051
197.004	0.331	0	0.338	0	0.313	0.31	0.283	0.284	0.202	0.199	0.121	0.119	0.051	0.051
197.204	0.327	0	0.333	0	0.312	0.31	0.285	0.284	0.198	0.199	0.119	0.119	0.05	0.051
197.404	0.332	0	0.337	0	0.313	0.31	0.285	0.284	0.199	0.199	0.115	0.119	0.054	0.051
197.604	0.328	0	0.332	0	0.308	0.31	0.285	0.284	0.196	0.199	0.114	0.119	0.052	0.051
197.804	0.331	0	0.333	0	0.308	0.309	0.283	0.284	0.194	0.199	0.121	0.119	0.048	0.051
198.004	0.324	0	0.334	0	0.312	0.309	0.282	0.284	0.202	0.199	0.117	0.119	0.048	0.051
198.204	0.324	0	0.331	0	0.317	0.309	0.283	0.284	0.201	0.199	0.12	0.119	0.05	0.051
198.404	0.33	0	0.338	0	0.312	0.309	0.284	0.284	0.2	0.199	0.12	0.119	0.048	0.051
198.604	0.329	0	0.333	0	0.315	0.309	0.286	0.284	0.198	0.199	0.12	0.119	0.049	0.051
198.804	0.326	0	0.334	0	0.316	0.309	0.287	0.284	0.194	0.199	0.121	0.119	0.046	0.051
199.004	0.329	0	0.337	0	0.31	0.309	0.282	0.284	0.198	0.199	0.121	0.119	0.047	0.051
199.204	0.329	0	0.338	0	0.309	0.309	0.287	0.284	0.193	0.199	0.121	0.119	0.051	0.051
199.404	0.334	0	0.342	0	0.318	0.309	0.29	0.284	0.2	0.199	0.125	0.119	0.056	0.051
199.604	0.331	0	0.335	0	0.315	0.309	0.286	0.284	0.206	0.199	0.121	0.119	0.053	0.051
199.804	0.334	0	0.341	0	0.319	0.309	0.29	0.284	0.202	0.199	0.126	0.119	0.051	0.051
200.004	0.332	0	0.334	0	0.315	0.309	0.284	0.283	0.203	0.199	0.122	0.119	0.054	0.051
200.204	0.328	0	0.335	0	0.312	0.309	0.283	0.283	0.201	0.199	0.12	0.119	0.051	0.051
200.404	0.327	0	0.335	0	0.311	0.309	0.281	0.283	0.198	0.199	0.12	0.119	0.045	0.051
200.604	0.328	0	0.335	0	0.311	0.309	0.284	0.283	0.197	0.199	0.116	0.119	0.049	0.051
200.804	0.328	0	0.338	0	0.313	0.309	0.284	0.283	0.201	0.199	0.123	0.119	0.05	0.051
201.004	0.329	0	0.338	0	0.316	0.309	0.29	0.283	0.202	0.199	0.125	0.119	0.055	0.051
201.204	0.334	0	0.333	0	0.314	0.309	0.29	0.283	0.202	0.199	0.126	0.119	0.052	0.051
201.404	0.32	0	0.334	0	0.308	0.309	0.288	0.283	0.198	0.199	0.123	0.119	0.048	0.051
201.604	0.325	0	0.336	0	0.31	0.309	0.285	0.283	0.2	0.199	0.12	0.119	0.052	0.051
201.804	0.329	0	0.336	0	0.311	0.309	0.288	0.283	0.199	0.199	0.12	0.119	0.053	0.051
202.004	0.329	0	0.333	0	0.309	0.309	0.282	0.283	0.198	0.199	0.123	0.119	0.052	0.051
202.204	0.335	0	0.335	0	0.313	0.309	0.285	0.283	0.197	0.199	0.127	0.119	0.055	0.051
202.404	0.33	0	0.336	0	0.306	0.308	0.277	0.283	0.199	0.199	0.117	0.119	0.052	0.051
202.604	0.332	0	0.335	0	0.305	0.308	0.286	0.283	0.2	0.199	0.118	0.119	0.05	0.051
202.804	0.327	0	0.343	0	0.312	0.308	0.291	0.283	0.199	0.199	0.123	0.119	0.055	0.051
203.004	0.333	0	0.334	0	0.312	0.308	0.283	0.283	0.202	0.199	0.123	0.119	0.045	0.051
203.204	0.327	0	0.333	0	0.309	0.308	0.282	0.283	0.195	0.199	0.118	0.119	0.048	0.051
203.404	0.327	0	0.331	0	0.313	0.308	0.288	0.283	0.199	0.199	0.117	0.119	0.053	0.051
203.604	0.326	0	0.336	0	0.311	0.308	0.289	0.283	0.199	0.199	0.122	0.119	0.047	0.051
203.804	0.329	0	0.333	0	0.31	0.308	0.281	0.283	0.202	0.199	0.118	0.119	0.046	0.051
204.004	0.33	0	0.333	0	0.311	0.308	0.284	0.283	0.203	0.199	0.12	0.119	0.049	0.051
204.204	0.327	0	0.333	0	0.306	0.308	0.281	0.283	0.199	0.199	0.115	0.119	0.053	0.051
204.404	0.327	0	0.331	0	0.307	0.308	0.28	0.283	0.196	0.199	0.118	0.119	0.048	0.051
204.604	0.329	0	0.336	0	0.312	0.308	0.283	0.283	0.201	0.199	0.121	0.119	0.055	0.051
204.804	0.324	0	0.336	0	0.31	0.308	0.283	0.283	0.205	0.199	0.121	0.119	0.052	0.051
205.004	0.331	0	0.331	0	0.312	0.308	0.287	0.283	0.2	0.199	0.123	0.119	0.049	0.051
205.204	0.328	0	0.334	0	0.312	0.308	0.281	0.283	0.198	0.199	0.114	0.119	0.049	0.051
205.404	0.328	0	0.333	0	0.316	0.308	0.286	0.283	0.2	0.199	0.121	0.119	0.053	0.051
205.604	0.325	0	0.329	0	0.31	0.308	0.278	0.283	0.196	0.199	0.12	0.119	0.048	0.051
205.804	0.331	0	0.333	0	0.315	0.308	0.285	0.283	0.204	0.199	0.124	0.119	0.052	0.051
206.004	0.328	0	0.33	0	0.307	0.308	0.283	0.283	0.196	0.199	0.119	0.119	0.049	0.051
206.204	0.329	0	0.336	0	0.31	0.308	0.282	0.283	0.203	0.199	0.121	0.119	0.055	0.051
206.404	0.321	0	0.331	0	0.312	0.308	0.288	0.283	0.2	0.199	0.121	0.119	0.049	0.051
206.604	0.326	0	0.334	0	0.309	0.308	0.285	0.283	0.194	0.199	0.118	0.119	0.048	0.051
206.804	0.327	0	0.333	0	0.313	0.308	0.289	0.282	0.2	0.199	0.119	0.119	0.05	0.051
207.004	0.333	0	0.336	0	0.312	0.308	0.286	0.282	0.197	0.199	0.12	0.119	0.053	0.051
207.204	0.326	0	0.335	0	0.311	0.308	0.29	0.282	0.203	0.199	0.123	0.119	0.049	0.051
207.404	0.333	0	0.336	0	0.314	0.308	0.286	0.282	0.196	0.199	0.124	0.119	0.052	0.051
207.604	0.326	0	0.339	0	0.313	0.307	0.287	0.282	0.201	0.198	0.123	0.119	0.051	0.051
207.804	0.322	0	0.333	0	0.31	0.307	0.275	0.282	0.197	0.198	0.119	0.119	0.044	0.051
208.004	0.336	0	0.34	0	0.313	0.307	0.289	0.282	0.205	0.198	0.125	0.119	0.056	0.051
208.204	0.33	0	0.335	0	0.309	0.307	0.289	0.282	0.201	0.198	0.119	0.119	0.053	0.051
208.404	0.328	0	0.34	0	0.311	0.307	0.284	0.282	0.199	0.198	0.12	0.119	0.055	0.051
208.604	0.327	0	0.336	0	0.312	0.307	0.289	0.282	0.202	0.198	0.123	0.119	0.055	0.051
208.804	0.319	0	0.328	0	0.311	0.307	0.277	0.282	0.196	0.198	0.116	0.119	0.044	0.051
209.004	0.324	0	0.331	0	0.305	0.307	0.286	0.282	0.2	0.198	0.118	0.119	0.051	0.051
209.204	0.326	0	0.328	0	0.306	0.307	0.285	0.282	0.201	0.198	0.119	0.119	0.051	0.051
209.404	0.322	0	0.33	0	0.311	0.307	0.286	0.282	0.202	0.198	0.119	0.119	0.051	0.051
209.604	0.322	0	0.334	0	0.308	0.307	0.28	0.282	0.196	0.198	0.117	0.119	0.043	0.051
209.804	0.323	0	0.327	0	0.31	0.307	0.28	0.282	0.198	0.198	0.117	0.119	0.051	0.051
210.004	0.327	0	0.33	0	0.309	0.307	0.285	0.282	0.197	0.198	0.122	0.119	0.049	0.051
210.204	0.323	0	0.336	0	0.316	0.307	0.287	0.282	0.2	0.198	0.119	0.119	0.053	0.051
210.404	0.328	0	0.327	0	0.313	0.307	0.285	0.282	0.2	0.198	0.123	0.119	0.054	0.051
210.604	0.331	0	0.332	0	0.309	0.307	0.286	0.282	0.197	0.198	0.122	0.119	0.054	0.051
210.804	0.321	0	0.333	0	0.31	0.307	0.278	0.282	0.196	0.198	0.122	0.119	0.049	0.051
211.004	0.326	0	0.328	0	0.31	0.307	0.284	0.282	0.197	0.198	0.114	0.119	0.05	0.051
211.204	0.32	0	0.331	0	0.305	0.307	0.281	0.282	0.195	0.198	0.114	0.119	0.05	0.051
211.404	0.328	0	0.329	0	0.309	0.307	0.28	0.282	0.2	0.198	0.121	0.119	0.045	0.051
211.604	0.323	0	0.334	0	0.308	0.307	0.278	0.282	0.195	0.198	0.12	0.119	0.048	0.051
211.804	0.325	0	0.338	0	0.308	0.307	0.284	0.282	0.2	0.198	0.118	0.119	0.051	0.051
212.004	0.323	0	0.329	0	0.305	0.307	0.277	0.282	0.195	0.198	0.11	0.119	0.044	0.051
212.204	0.325	0	0.333	0	0.31	0.307	0.28	0.282	0.196	0.198	0.118	0.119	0.045	0.051
212.404	0.324	0	0.326	0	0.312	0.307	0.28	0.282	0.194	0.198	0.119	0.119	0.05	0.051
212.604	0.319	0	0.328	0	0.305	0.307	0.282	0.282	0.192	0.198	0.111	0.119	0.045	0.051
212.804	0.319	0	0.326	0	0.305	0.307	0.277	0.282	0.195	0.198	0.113	0.119	0.049	0.051
213.004	0.337	0	0.33	0	0.317	0.306	0.291	0.282	0.205	0.198	0.122	0.119	0.058	0.051
213.204	0.332	0	0.333	0	0.315	0.306	0.289	0.282	0.201	0.198	0.124	0.119	0.053	0.051
213.404	0.326	0	0.339	0	0.318	0.306	0.288	0.282	0.202	0.198	0.123	0.119	0.055	0.051
213.604	0.326	0	0.333	0	0.314	0.306	0.282	0.282	0.2	0.198	0.12	0.119	0.049	0.051
213.804	0.321	0	0.328	0	0.302	0.306	0.28	0.282	0.197	0.198	0.118	0.119	0.054	0.051
214.004	0.323	0	0.328	0	0.308	0.306	0.282	0.282	0.195	0.198	0.115	0.119	0.047	0.051
214.204	0.321	0	0.329	0	0.301	0.306	0.278	0.281	0.192	0.198	0.111	0.119	0.047	0.051
214.404	0.326	0	0.333	0	0.307	0.306	0.281	0.281	0.196	0.198	0.115	0.119	0.053	0.051
214.604	0.319	0	0.327	0	0.304	0.306	0.281	0.281	0.194	0.198	0.113	0.119	0.049	0.051
214.804	0.321	0	0.331	0	0.312	0.306	0.28	0.281	0.199	0.198	0.112	0.119	0.051	0.051
215.004	0.327	0	0.334	0	0.314	0.306	0.284	0.281	0.196	0.198	0.122	0.119	0.055	0.051
215.204	0.315	0	0.333	0	0.31	0.306	0.283	0.281	0.194	0.198	0.12	0.119	0.048	0.051
215.404	0.318	0	0.329	0	0.308	0.306	0.284	0.281	0.196	0.198	0.117	0.119	0.047	0.051
215.604	0.325	0	0.328	0	0.304	0.306	0.285	0.281	0.198	0.198	0.113	0.119	0.049	0.051
215.804	0.322	0	0.328	0	0.3	0.306	0.282	0.281	0.195	0.198	0.117	0.119	0.049	0.051
216.004	0.326	0	0.333	0	0.314	0.306	0.286	0.281	0.198	0.198	0.126	0.119	0.048	0.051
216.204	0.326	0	0.335	0	0.311	0.306	0.283	0.281	0.199	0.198	0.119	0.119	0.053	0.051
216.404	0.321	0	0.327	0	0.307	0.306	0.274	0.281	0.194	0.198	0.113	0.119	0.049	0.051
216.604	0.322	0	0.335	0	0.311	0.306	0.285	0.281	0.195	0.198	0.119	0.119	0.054	0.051
216.804	0.327	0	0.328	0	0.309	0.306	0.282	0.281	0.199	0.198	0.119	0.119	0.051	0.051
217.004	0.324	0	0.33	0	0.309	0.306	0.287	0.281	0.2	0.198	0.121	0.119	0.056	0.051
217.204	0.325	0	0.326	0	0.311	0.306	0.277	0.281	0.196	0.198	0.119	0.119	0.052	0.051
217.404	0.329	0	0.335	0	0.311	0.306	0.279	0.281	0.197	0.198	0.115	0.119	0.054	0.051
217.604	0.326	0	0.329	0	0.304	0.306	0.278	0.281	0.199	0.198	0.12	0.119	0.046	0.051
217.804	0.322	0	0.33	0	0.305	0.306	0.278	0.281	0.197	0.198	0.113	0.119	0.053	0.051
218.004	0.322	0	0.323	0	0.308	0.306	0.288	0.281	0.2	0.198	0.113	0.119	0.05	0.051
218.204	0.33	0	0.337	0	0.318	0.306	0.291	0.281	0.203	0.198	0.126	0.119	0.057	0.051
218.404	0.326	0	0.337	0	0.313	0.306	0.286	0.281	0.199	0.198	0.123	0.119	0.05	0.051
218.604	0.329	0	0.336	0	0.318	0.306	0.286	0.281	0.202	0.198	0.122	0.119	0.055	0.051
218.804	0.334	0	0.336	0	0.312	0.306	0.283	0.281	0.206	0.198	0.124	0.119	0.053	0.051
219.004	0.322	0	0.318	0	0.305	0.305	0.275	0.281	0.196	0.198	0.115	0.119	0.049	0.051
219.204	0.322	0	0.328	0	0.307	0.305	0.283	0.281	0.203	0.198	0.117	0.119	0.05	0.051
219.404	0.324	0	0.331	0	0.312	0.305	0.282	0.281	0.197	0.198	0.122	0.119	0.052	0.051
219.604	0.319	0	0.33	0	0.314	0.305	0.283	0.281	0.202	0.198	0.116	0.119	0.05	0.051
219.804	0.321	0	0.329	0	0.309	0.305	0.28	0.281	0.195	0.198	0.117	0.119	0.05	0.051
220.004	0.326	0	0.335	0	0.311	0.305	0.284	0.281	0.201	0.198	0.122	0.119	0.054	0.051
220.204	0.327	0	0.335	0	0.311	0.305	0.291	0.281	0.2	0.198	0.12	0.119	0.055	0.051
220.404	0.325	0	0.329	0	0.311	0.305	0.29	0.281	0.203	0.198	0.123	0.119	0.056	0.051
220.604	0.321	0	0.327	0	0.305	0.305	0.285	0.281	0.196	0.198	0.12	0.119	0.046	0.051
220.804	0.323	0	0.331	0	0.308	0.305	0.28	0.281	0.195	0.198	0.12	0.119	0.048	0.051
221.004	0.32	0	0.33	0	0.302	0.305	0.281	0.281	0.197	0.198	0.119	0.119	0.05	0.051
221.204	0.32	0	0.331	0	0.311	0.305	0.282	0.281	0.197	0.198	0.118	0.119	0.051	0.051
221.404	0.318	0	0.332	0	0.3	0.305	0.276	0.281	0.195	0.198	0.113	0.119	0.048	0.051
221.604	0.328	0	0.331	0	0.311	0.305	0.279	0.281	0.201	0.198	0.124	0.119	0.053	0.051
221.804	0.322	0	0.328	0	0.306	0.305	0.28	0.281	0.196	0.198	0.121	0.119	0.052	0.051
222.004	0.325	0	0.33	0	0.307	0.305	0.28	0.281	0.199	0.198	0.116	0.119	0.05	0.051
222.204	0.33	0	0.324	0	0.308	0.305	0.278	0.28	0.196	0.198	0.121	0.119	0.049	0.051
222.404	0.319	0	0.328	0	0.304	0.305	0.277	0.28	0.197	0.198	0.115	0.119	0.053	0.051
222.604	0.321	0	0.331	0	0.311	0.305	0.282	0.28	0.199	0.198	0.121	0.119	0.053	0.051
222.804	0.324	0	0.333	0	0.313	0.305	0.283	0.28	0.198	0.198	0.123	0.119	0.055	0.051
223.004	0.321	0	0.337	0	0.308	0.305	0.28	0.28	0.195	0.198	0.126	0.119	0.055	0.051
223.204	0.326	0	0.327	0	0.305	0.305	0.283	0.28	0.195	0.198	0.117	0.119	0.053	0.051
223.404	0.329	0	0.331	0	0.313	0.305	0.289	0.28	0.204	0.198	0.123	0.119	0.056	0.051
223.604	0.32	0	0.327	0	0.309	0.305	0.281	0.28	0.2	0.198	0.118	0.119	0.049	0.051
223.804	0.325	0	0.326	0	0.305	0.305	0.279	0.28	0.193	0.198	0.117	0.119	0.048	0.051
224.004	0.318	0	0.318	0	0.296	0.305	0.275	0.28	0.189	0.198	0.111	0.119	0.038	0.051
224.204	0.32	0	0.332	0	0.31	0.305	0.284	0.28	0.201	0.198	0.126	0.119	0.054	0.051
224.404	0.323	0	0.329	0	0.314	0.305	0.282	0.28	0.2	0.197	0.121	0.118	0.053	0.051
224.604	0.328	0	0.323	0	0.308	0.305	0.28	0.28	0.201	0.197	0.121	0.118	0.05	0.051
224.804	0.321	0	0.33	0	0.305	0.305	0.282	0.28	0.195	0.197	0.116	0.118	0.043	0.051
225.004	0.325	0	0.331	0	0.312	0.305	0.281	0.28	0.196	0.197	0.119	0.118	0.052	0.051
225.204	0.319	0	0.327	0	0.307	0.305	0.277	0.28	0.197	0.197	0.111	0.118	0.048	0.051
225.404	0.329	0	0.333	0	0.31	0.305	0.284	0.28	0.197	0.197	0.12	0.118	0.054	0.051
225.604	0.318	0	0.326	0	0.304	0.304	0.279	0.28	0.197	0.197	0.119	0.118	0.046	0.051
225.804	0.319	0	0.327	0	0.309	0.304	0.277	0.28	0.197	0.197	0.118	0.118	0.048	0.051
226.004	0.317	0	0.327	0	0.306	0.304	0.282	0.28	0.202	0.197	0.117	0.118	0.055	0.051
226.204	0.318	0	0.329	0	0.308	0.304	0.282	0.28	0.198	0.197	0.115	0.118	0.052	0.051
226.404	0.315	0	0.325	0	0.302	0.304	0.273	0.28	0.195	0.197	0.109	0.118	0.045	0.051
226.604	0.316	0	0.326	0	0.312	0.304	0.278	0.28	0.197	0.197	0.114	0.118	0.052	0.051
226.804	0.32	0	0.328	0	0.307	0.304	0.276	0.28	0.195	0.197	0.118	0.118	0.051	0.051
227.004	0.324	0	0.33	0	0.313	0.304	0.28	0.28	0.196	0.197	0.119	0.118	0.055	0.051
227.204	0.317	0	0.326	0	0.306	0.304	0.275	0.28	0.19	0.197	0.113	0.118	0.051	0.051
227.404	0.317	0	0.321	0	0.301	0.304	0.277	0.28	0.196	0.197	0.114	0.118	0.052	0.051
227.604	0.322	0	0.326	0	0.305	0.304	0.282	0.28	0.196	0.197	0.116	0.118	0.05	0.051
227.804	0.319	0	0.329	0	0.307	0.304	0.279	0.28	0.193	0.197	0.119	0.118	0.05	0.051
228.004	0.318	0	0.322	0	0.303	0.304	0.274	0.28	0.19	0.197	0.112	0.118	0.049	0.051
228.204	0.324	0	0.328	0	0.303	0.304	0.281	0.28	0.199	0.197	0.119	0.118	0.054	0.051
228.404	0.317	0	0.322	0	0.301	0.304	0.28	0.28	0.196	0.197	0.117	0.118	0.048	0.051
228.604	0.319	0	0.327	0	0.31	0.304	0.278	0.28	0.197	0.197	0.118	0.118	0.053	0.051
228.804	0.316	0	0.329	0	0.301	0.304	0.278	0.28	0.197	0.197	0.115	0.118	0.05	0.051
229.004	0.322	0	0.328	0	0.308	0.304	0.278	0.28	0.194	0.197	0.121	0.118	0.048	0.051
229.204	0.319	0	0.331	0	0.309	0.304	0.28	0.28	0.199	0.197	0.118	0.118	0.051	0.051
229.404	0.319	0	0.324	0	0.306	0.304	0.286	0.28	0.194	0.197	0.118	0.118	0.05	0.051
229.604	0.323	0	0.333	0	0.311	0.304	0.283	0.28	0.203	0.197	0.122	0.118	0.055	0.051
229.804	0.317	0	0.33	0	0.308	0.304	0.274	0.28	0.197	0.197	0.12	0.118	0.05	0.051
230.004	0.32	0	0.325	0	0.309	0.304	0.282	0.28	0.2	0.197	0.122	0.118	0.054	0.051
230.204	0.316	0	0.324	0	0.305	0.304	0.276	0.28	0.193	0.197	0.114	0.118	0.048	0.051
230.404	0.323	0	0.331	0	0.31	0.304	0.279	0.28	0.194	0.197	0.114	0.118	0.052	0.051
230.604	0.318	0	0.329	0	0.308	0.304	0.278	0.28	0.196	0.197	0.119	0.118	0.056	0.051
230.804	0.32	0	0.325	0	0.309	0.304	0.282	0.279	0.197	0.197	0.119	0.118	0.047	0.051
231.004	0.318	0	0.333	0	0.304	0.304	0.277	0.279	0.195	0.197	0.118	0.118	0.047	0.051
231.204	0.321	0	0.324	0	0.297	0.304	0.278	0.279	0.194	0.197	0.11	0.118	0.049	0.051
231.404	0.317	0	0.326	0	0.304	0.304	0.278	0.279	0.198	0.197	0.116	0.118	0.052	0.051
231.604	0.326	0	0.332	0	0.302	0.304	0.284	0.279	0.201	0.197	0.125	0.118	0.055	0.051
231.804	0.318	0	0.333	0	0.309	0.304	0.288	0.279	0.195	0.197	0.119	0.118	0.051	0.051
232.004	0.324	0	0.332	0	0.304	0.304	0.279	0.279	0.194	0.197	0.118	0.118	0.056	0.051
232.204	0.314	0	0.326	0	0.297	0.304	0.275	0.279	0.194	0.197	0.111	0.118	0.051	0.051
232.404	0.322	0	0.326	0	0.304	0.304	0.282	0.279	0.198	0.197	0.123	0.118	0.05	0.051
232.604	0.324	0	0.33	0	0.309	0.303	0.278	0.279	0.197	0.197	0.123	0.118	0.048	0.051
232.804	0.313	0	0.324	0	0.303	0.303	0.274	0.279	0.194	0.197	0.115	0.118	0.05	0.051
233.004	0.315	0	0.319	0	0.3	0.303	0.274	0.279	0.194	0.197	0.115	0.118	0.046	0.051
233.204	0.326	0	0.334	0	0.308	0.303	0.28	0.279	0.199	0.197	0.126	0.118	0.055	0.051
233.404	0.316	0	0.326	0	0.301	0.303	0.28	0.279	0.195	0.197	0.117	0.118	0.048	0.051
233.604	0.318	0	0.328	0	0.307	0.303	0.28	0.279	0.196	0.197	0.112	0.118	0.047	0.051
233.804	0.319	0	0.327	0	0.305	0.303	0.279	0.279	0.195	0.197	0.116	0.118	0.051	0.051
234.004	0.315	0	0.324	0	0.306	0.303	0.279	0.279	0.191	0.197	0.117	0.118	0.049	0.051
234.204	0.318	0	0.327	0	0.303	0.303	0.275	0.279	0.193	0.197	0.112	0.118	0.046	0.051
234.404	0.324	0	0.332	0	0.302	0.303	0.283	0.279	0.196	0.197	0.12	0.118	0.054	0.051
234.604	0.324	0	0.334	0	0.307	0.303	0.285	0.279	0.199	0.197	0.126	0.118	0.054	0.051
234.804	0.314	0	0.322	0	0.306	0.303	0.279	0.279	0.198	0.197	0.118	0.118	0.052	0.051
235.004	0.324	0	0.33	0	0.306	0.303	0.277	0.279	0.197	0.197	0.127	0.118	0.053	0.051
235.204	0.325	0	0.325	0	0.302	0.303	0.279	0.279	0.198	0.197	0.123	0.118	0.059	0.051
235.404	0.322	0	0.328	0	0.306	0.303	0.283	0.279	0.201	0.197	0.121	0.118	0.054	0.051
235.604	0.318	0	0.331	0	0.308	0.303	0.28	0.279	0.198	0.197	0.117	0.118	0.053	0.051
235.804	0.324	0	0.335	0	0.309	0.303	0.284	0.279	0.2	0.197	0.118	0.118	0.053	0.051
236.004	0.317	0	0.328	0	0.309	0.303	0.285	0.279	0.199	0.197	0.118	0.118	0.049	0.051
236.204	0.318	0	0.331	0	0.31	0.303	0.281	0.279	0.201	0.197	0.123	0.118	0.053	0.051
236.404	0.317	0	0.325	0	0.304	0.303	0.275	0.279	0.197	0.197	0.117	0.118	0.046	0.051
236.604	0.317	0	0.327	0	0.303	0.303	0.277	0.279	0.192	0.197	0.112	0.118	0.049	0.051
236.804	0.327	0	0.334	0	0.308	0.303	0.287	0.279	0.201	0.197	0.126	0.118	0.057	0.051
237.004	0.314	0	0.325	0	0.301	0.303	0.279	0.279	0.194	0.197	0.119	0.118	0.05	0.051
237.204	0.318	0	0.325	0	0.304	0.303	0.28	0.279	0.195	0.197	0.115	0.118	0.047	0.051
237.404	0.317	0	0.324	0	0.303	0.303	0.278	0.279	0.191	0.197	0.117	0.118	0.051	0.051
237.604	0.32	0	0.329	0	0.302	0.303	0.284	0.279	0.198	0.197	0.124	0.118	0.053	0.051
237.804	0.32	0	0.32	0	0.308	0.303	0.277	0.279	0.195	0.197	0.112	0.118	0.052	0.051
238.004	0.32	0	0.321	0	0.305	0.303	0.277	0.279	0.197	0.197	0.116	0.118	0.049	0.051
238.204	0.317	0	0.333	0	0.31	0.303	0.279	0.279	0.198	0.197	0.122	0.118	0.053	0.051
238.404	0.316	0	0.33	0	0.308	0.303	0.284	0.279	0.198	0.197	0.121	0.118	0.051	0.051
238.604	0.318	0	0.33	0	0.304	0.303	0.276	0.279	0.195	0.197	0.115	0.118	0.051	0.051
238.804	0.323	0	0.331	0	0.302	0.303	0.278	0.279	0.196	0.197	0.119	0.118	0.053	0.051
239.004	0.321	0	0.33	0	0.306	0.303	0.281	0.279	0.2	0.197	0.119	0.118	0.056	0.051
239.204	0.317	0	0.331	0	0.308	0.303	0.277	0.279	0.2	0.197	0.122	0.118	0.051	0.051
239.404	0.323	0	0.331	0	0.307	0.303	0.28	0.279	0.202	0.197	0.121	0.118	0.054	0.051
239.604	0.317	0	0.325	0	0.301	0.303	0.276	0.279	0.193	0.197	0.117	0.118	0.05	0.051
239.804	0.323	0	0.333	0	0.308	0.303	0.278	0.279	0.196	0.197	0.124	0.118	0.051	0.051
240.004	0.321	0	0.328	0	0.307	0.303	0.278	0.279	0.194	0.197	0.117	0.118	0.051	0.051
240.204	0.317	0	0.326	0	0.305	0.302	0.28	0.278	0.195	0.197	0.117	0.118	0.051	0.051
240.404	0.32	0	0.328	0	0.306	0.302	0.283	0.278	0.194	0.197	0.118	0.118	0.051	0.051
240.604	0.323	0	0.329	0	0.313	0.302	0.279	0.278	0.197	0.197	0.119	0.118	0.054	0.051
240.804	0.315	0	0.33	0	0.302	0.302	0.277	0.278	0.198	0.197	0.122	0.118	0.052	0.051
241.004	0.318	0	0.326	0	0.304	0.302	0.277	0.278	0.199	0.197	0.119	0.118	0.052	0.051
241.204	0.317	0	0.329	0	0.305	0.302	0.275	0.278	0.193	0.197	0.117	0.118	0.053	0.051
241.404	0.322	0	0.325	0	0.311	0.302	0.281	0.278	0.195	0.196	0.118	0.118	0.05	0.051
241.604	0.317	0	0.325	0	0.302	0.302	0.273	0.278	0.192	0.196	0.118	0.118	0.047	0.051
241.804	0.317	0	0.316	0	0.299	0.302	0.276	0.278	0.19	0.196	0.112	0.118	0.049	0.05
242.004	0.316	0	0.327	0	0.298	0.302	0.271	0.278	0.192	0.196	0.115	0.118	0.043	0.05
242.204	0.322	0	0.333	0	0.305	0.302	0.283	0.278	0.198	0.196	0.121	0.118	0.059	0.05
242.404	0.323	0	0.33	0	0.304	0.302	0.283	0.278	0.197	0.196	0.124	0.118	0.053	0.05
242.604	0.322	0	0.329	0	0.305	0.302	0.284	0.278	0.199	0.196	0.122	0.118	0.053	0.05
242.804	0.319	0	0.324	0	0.302	0.302	0.283	0.278	0.196	0.196	0.12	0.118	0.05	0.05
243.004	0.315	0	0.322	0	0.295	0.302	0.276	0.278	0.19	0.196	0.113	0.118	0.048	0.05
243.204	0.322	0	0.324	0	0.306	0.302	0.281	0.278	0.199	0.196	0.123	0.118	0.05	0.05
243.404	0.318	0	0.323	0	0.301	0.302	0.273	0.278	0.193	0.196	0.118	0.118	0.051	0.05
243.604	0.317	0	0.32	0	0.303	0.302	0.277	0.278	0.194	0.196	0.114	0.118	0.048	0.05
243.804	0.32	0	0.325	0	0.304	0.302	0.281	0.278	0.194	0.196	0.12	0.118	0.053	0.05
244.004	0.314	0	0.317	0	0.294	0.302	0.268	0.278	0.189	0.196	0.112	0.118	0.048	0.05
244.204	0.313	0	0.322	0	0.298	0.302	0.273	0.278	0.19	0.196	0.112	0.118	0.045	0.05
244.404	0.32	0	0.324	0	0.3	0.302	0.28	0.278	0.198	0.196	0.116	0.118	0.05	0.05
244.604	0.322	0	0.325	0	0.303	0.302	0.282	0.278	0.189	0.196	0.122	0.118	0.05	0.05
244.804	0.318	0	0.322	0	0.303	0.302	0.277	0.278	0.199	0.196	0.117	0.118	0.051	0.05
245.004	0.314	0	0.325	0	0.297	0.302	0.268	0.278	0.19	0.196	0.113	0.118	0.049	0.05
245.204	0.313	0	0.322	0	0.303	0.302	0.279	0.278	0.19	0.196	0.114	0.118	0.05	0.05
245.404	0.322	0	0.325	0	0.303	0.302	0.281	0.278	0.196	0.196	0.12	0.118	0.047	0.05
245.604	0.315	0	0.32	0	0.3	0.302	0.274	0.278	0.194	0.196	0.111	0.118	0.048	0.05
245.804	0.311	0	0.318	0	0.301	0.302	0.277	0.278	0.19	0.196	0.111	0.118	0.047	0.05
246.004	0.317	0	0.325	0	0.302	0.302	0.278	0.278	0.193	0.196	0.113	0.118	0.043	0.05
246.204	0.324	0	0.334	0	0.309	0.302	0.286	0.278	0.2	0.196	0.122	0.118	0.058	0.05
246.404	0.319	0	0.326	0	0.303	0.302	0.28	0.278	0.199	0.196	0.12	0.118	0.053	0.05
246.604	0.317	0	0.322	0	0.303	0.302	0.283	0.278	0.2	0.196	0.119	0.118	0.051	0.05
246.804	0.321	0	0.327	0	0.305	0.302	0.284	0.278	0.2	0.196	0.119	0.118	0.055	0.05
247.004	0.307	0	0.315	0	0.297	0.302	0.272	0.278	0.19	0.196	0.12	0.118	0.046	0.05
247.204	0.315	0	0.327	0	0.301	0.302	0.277	0.278	0.193	0.196	0.116	0.118	0.045	0.05
247.404	0.318	0	0.326	0	0.305	0.302	0.281	0.278	0.199	0.196	0.116	0.118	0.048	0.05
247.604	0.312	0	0.322	0	0.296	0.302	0.274	0.278	0.193	0.196	0.112	0.118	0.048	0.05
247.804	0.319	0	0.324	0	0.305	0.302	0.277	0.278	0.199	0.196	0.115	0.118	0.055	0.05
248.004	0.319	0	0.324	0	0.303	0.302	0.279	0.278	0.192	0.196	0.117	0.118	0.053	0.05
248.204	0.321	0	0.331	0	0.303	0.301	0.279	0.278	0.196	0.196	0.125	0.118	0.05	0.05
248.404	0.314	0	0.326	0	0.298	0.301	0.279	0.278	0.195	0.196	0.118	0.118	0.047	0.05
248.604	0.317	0	0.324	0	0.304	0.301	0.279	0.278	0.201	0.196	0.119	0.118	0.053	0.05
248.804	0.319	0	0.328	0	0.306	0.301	0.282	0.278	0.198	0.196	0.117	0.118	0.05	0.05
249.004	0.317	0	0.326	0	0.3	0.301	0.28	0.278	0.196	0.196	0.116	0.118	0.051	0.05
249.204	0.317	0	0.325	0	0.303	0.301	0.27	0.278	0.193	0.196	0.12	0.118	0.048	0.05
249.404	0.319	0	0.328	0	0.302	0.301	0.278	0.278	0.195	0.196	0.117	0.118	0.049	0.05
249.604	0.319	0	0.326	0	0.306	0.301	0.277	0.278	0.198	0.196	0.12	0.118	0.053	0.05
249.804	0.314	0	0.322	0	0.299	0.301	0.278	0.278	0.193	0.196	0.117	0.118	0.051	0.05
250.004	0.323	0	0.325	0	0.3	0.301	0.277	0.277	0.193	0.196	0.115	0.118	0.045	0.05
250.204	0.317	0	0.326	0	0.302	0.301	0.281	0.277	0.198	0.196	0.122	0.118	0.056	0.05
250.404	0.314	0	0.327	0	0.301	0.301	0.278	0.277	0.19	0.196	0.122	0.118	0.052	0.05
250.604	0.311	0	0.32	0	0.299	0.301	0.277	0.277	0.189	0.196	0.114	0.118	0.046	0.05
250.804	0.314	0	0.326	0	0.305	0.301	0.272	0.277	0.193	0.196	0.111	0.118	0.045	0.05
251.004	0.314	0	0.326	0	0.3	0.301	0.277	0.277	0.191	0.196	0.114	0.118	0.051	0.05
251.204	0.318	0	0.325	0	0.301	0.301	0.274	0.277	0.197	0.196	0.115	0.118	0.049	0.05
251.404	0.318	0	0.325	0	0.303	0.301	0.28	0.277	0.197	0.196	0.12	0.118	0.051	0.05
251.604	0.316	0	0.323	0	0.3	0.301	0.274	0.277	0.19	0.196	0.121	0.118	0.048	0.05
251.804	0.318	0	0.326	0	0.3	0.301	0.276	0.277	0.193	0.196	0.117	0.118	0.049	0.05
252.004	0.315	0	0.325	0	0.297	0.301	0.276	0.277	0.19	0.196	0.112	0.118	0.044	0.05
252.204	0.317	0	0.331	0	0.309	0.301	0.285	0.277	0.2	0.196	0.119	0.118	0.056	0.05
252.404	0.32	0	0.322	0	0.303	0.301	0.279	0.277	0.2	0.196	0.116	0.118	0.052	0.05
252.604	0.315	0	0.324	0	0.3	0.301	0.272	0.277	0.197	0.196	0.122	0.118	0.051	0.05
252.804	0.323	0	0.326	0	0.308	0.301	0.282	0.277	0.195	0.196	0.123	0.117	0.053	0.05
253.004	0.313	0	0.324	0	0.295	0.301	0.274	0.277	0.196	0.196	0.116	0.117	0.047	0.05
253.204	0.314	0	0.324	0	0.301	0.301	0.271	0.277	0.194	0.196	0.117	0.117	0.05	0.05
253.404	0.319	0	0.32	0	0.306	0.301	0.275	0.277	0.196	0.196	0.12	0.117	0.05	0.05
253.604	0.323	0	0.329	0	0.303	0.301	0.281	0.277	0.196	0.196	0.124	0.117	0.051	0.05
253.804	0.312	0	0.318	0	0.299	0.301	0.276	0.277	0.192	0.196	0.119	0.117	0.046	0.05
254.004	0.314	0	0.324	0	0.301	0.301	0.272	0.277	0.193	0.196	0.111	0.117	0.045	0.05
254.204	0.311	0	0.324	0	0.299	0.301	0.279	0.277	0.188	0.196	0.113	0.117	0.045	0.05
254.404	0.321	0	0.327	0	0.309	0.301	0.279	0.277	0.197	0.196	0.117	0.117	0.053	0.05
254.604	0.318	0	0.329	0	0.305	0.301	0.277	0.277	0.195	0.196	0.117	0.117	0.048	0.05
254.804	0.317	0	0.327	0	0.3	0.301	0.278	0.277	0.196	0.196	0.115	0.117	0.044	0.05
255.004	0.313	0	0.318	0	0.296	0.301	0.269	0.277	0.192	0.196	0.114	0.117	0.047	0.05
255.204	0.316	0	0.32	0	0.298	0.301	0.274	0.277	0.193	0.196	0.121	0.117	0.047	0.05
255.404	0.317	0	0.327	0	0.299	0.301	0.273	0.277	0.19	0.196	0.113	0.117	0.048	0.05
255.604	0.317	0	0.324	0	0.306	0.301	0.282	0.277	0.198	0.196	0.119	0.117	0.05	0.05
255.804	0.321	0	0.325	0	0.306	0.301	0.283	0.277	0.201	0.196	0.12	0.117	0.055	0.05
256.004	0.314	0	0.326	0	0.298	0.301	0.271	0.277	0.193	0.196	0.113	0.117	0.048	0.05
256.204	0.314	0	0.318	0	0.298	0.301	0.274	0.277	0.192	0.196	0.112	0.117	0.048	0.05
256.404	0.319	0	0.324	0	0.304	0.301	0.276	0.277	0.2	0.196	0.121	0.117	0.051	0.05
256.604	0.319	0	0.325	0	0.302	0.301	0.278	0.277	0.196	0.196	0.123	0.117	0.049	0.05
256.804	0.308	0	0.317	0	0.298	0.3	0.273	0.277	0.189	0.196	0.112	0.117	0.047	0.05
257.004	0.318	0	0.323	0	0.299	0.3	0.274	0.277	0.191	0.196	0.115	0.117	0.048	0.05
257.204	0.311	0	0.319	0	0.301	0.3	0.277	0.277	0.193	0.196	0.116	0.117	0.05	0.05
257.404	0.313	0	0.322	0	0.297	0.3	0.274	0.277	0.193	0.196	0.113	0.117	0.049	0.05
257.604	0.32	0	0.327	0	0.301	0.3	0.279	0.277	0.198	0.196	0.12	0.117	0.051	0.05
257.804	0.313	0	0.321	0	0.297	0.3	0.278	0.277	0.194	0.196	0.118	0.117	0.052	0.05
258.004	0.318	0	0.322	0	0.305	0.3	0.278	0.277	0.196	0.196	0.12	0.117	0.053	0.05
258.204	0.314	0	0.324	0	0.295	0.3	0.273	0.277	0.189	0.196	0.115	0.117	0.051	0.05
258.404	0.317	0	0.325	0	0.303	0.3	0.28	0.277	0.196	0.195	0.121	0.117	0.056	0.05
258.604	0.318	0	0.326	0	0.303	0.3	0.275	0.277	0.196	0.195	0.114	0.117	0.055	0.05
258.804	0.315	0	0.319	0	0.3	0.3	0.271	0.277	0.198	0.195	0.111	0.117	0.053	0.05
259.004	0.313	0	0.322	0	0.297	0.3	0.274	0.277	0.198	0.195	0.116	0.117	0.053	0.05
259.204	0.315	0	0.321	0	0.3	0.3	0.275	0.277	0.197	0.195	0.12	0.117	0.05	0.05
259.404	0.319	0	0.326	0	0.303	0.3	0.282	0.277	0.195	0.195	0.122	0.117	0.05	0.05
259.604	0.31	0	0.319	0	0.301	0.3	0.272	0.277	0.196	0.195	0.11	0.117	0.043	0.05
259.804	0.318	0	0.326	0	0.307	0.3	0.282	0.277	0.2	0.195	0.12	0.117	0.052	0.05
260.004	0.315	0	0.321	0	0.301	0.3	0.274	0.277	0.197	0.195	0.119	0.117	0.048	0.05
260.204	0.316	0	0.324	0	0.302	0.3	0.276	0.277	0.197	0.195	0.112	0.117	0.051	0.05
260.404	0.31	0	0.321	0	0.301	0.3	0.275	0.276	0.196	0.195	0.112	0.117	0.053	0.05
260.604	0.315	0	0.322	0	0.3	0.3	0.275	0.276	0.197	0.195	0.12	0.117	0.051	0.05
260.804	0.315	0	0.323	0	0.301	0.3	0.274	0.276	0.191	0.195	0.118	0.117	0.052	0.05
261.004	0.319	0	0.325	0	0.3	0.3	0.275	0.276	0.197	0.195	0.115	0.117	0.047	0.05
261.204	0.317	0	0.328	0	0.307	0.3	0.286	0.276	0.199	0.195	0.122	0.117	0.06	0.05
261.404	0.314	0	0.327	0	0.306	0.3	0.278	0.276	0.194	0.195	0.118	0.117	0.053	0.05
261.604	0.312	0	0.324	0	0.302	0.3	0.277	0.276	0.192	0.195	0.121	0.117	0.054	0.05
261.804	0.315	0	0.324	0	0.302	0.3	0.277	0.276	0.199	0.195	0.118	0.117	0.055	0.05
262.004	0.313	0	0.326	0	0.3	0.3	0.28	0.276	0.189	0.195	0.115	0.117	0.047	0.05
262.204	0.316	0	0.326	0	0.307	0.3	0.281	0.276	0.202	0.195	0.122	0.117	0.057	0.05
262.404	0.315	0	0.323	0	0.3	0.3	0.272	0.276	0.198	0.195	0.115	0.117	0.05	0.05
262.604	0.319	0	0.327	0	0.304	0.3	0.275	0.276	0.198	0.195	0.119	0.117	0.057	0.05
262.804	0.31	0	0.313	0	0.297	0.3	0.266	0.276	0.189	0.195	0.109	0.117	0.047	0.05
263.004	0.314	0	0.32	0	0.296	0.3	0.274	0.276	0.194	0.195	0.112	0.117	0.048	0.05
263.204	0.315	0	0.326	0	0.303	0.3	0.28	0.276	0.193	0.195	0.119	0.117	0.052	0.05
263.404	0.31	0	0.325	0	0.298	0.3	0.274	0.276	0.192	0.195	0.117	0.117	0.05	0.05
263.604	0.316	0	0.324	0	0.303	0.3	0.284	0.276	0.199	0.195	0.123	0.117	0.054	0.05
263.804	0.315	0	0.32	0	0.301	0.3	0.276	0.276	0.196	0.195	0.119	0.117	0.052	0.05
264.004	0.322	0	0.33	0	0.307	0.3	0.278	0.276	0.197	0.195	0.123	0.117	0.056	0.05
264.204	0.313	0	0.327	0	0.298	0.3	0.273	0.276	0.191	0.195	0.115	0.117	0.053	0.05
264.404	0.315	0	0.32	0	0.303	0.3	0.278	0.276	0.192	0.195	0.119	0.117	0.055	0.05
264.604	0.308	0	0.315	0	0.297	0.3	0.27	0.276	0.186	0.195	0.108	0.117	0.041	0.05
264.804	0.314	0	0.329	0	0.304	0.3	0.275	0.276	0.194	0.195	0.117	0.117	0.054	0.05
265.004	0.31	0	0.319	0	0.301	0.3	0.275	0.276	0.194	0.195	0.117	0.117	0.051	0.05
265.204	0.311	0	0.321	0	0.3	0.3	0.277	0.276	0.189	0.195	0.117	0.117	0.053	0.05
265.404	0.319	0	0.326	0	0.299	0.3	0.281	0.276	0.2	0.195	0.122	0.117	0.055	0.05
265.604	0.314	0	0.326	0	0.305	0.3	0.281	0.276	0.192	0.195	0.121	0.117	0.054	0.05
265.804	0.319	0	0.326	0	0.305	0.3	0.28	0.276	0.198	0.195	0.123	0.117	0.057	0.05
266.004	0.31	0	0.322	0	0.296	0.299	0.272	0.276	0.194	0.195	0.116	0.117	0.046	0.05
266.204	0.316	0	0.325	0	0.301	0.299	0.274	0.276	0.192	0.195	0.119	0.117	0.054	0.05
266.404	0.319	0	0.323	0	0.301	0.299	0.28	0.276	0.193	0.195	0.115	0.117	0.054	0.05
266.604	0.318	0	0.324	0	0.302	0.299	0.278	0.276	0.197	0.195	0.121	0.117	0.049	0.05
266.804	0.319	0	0.319	0	0.299	0.299	0.277	0.276	0.193	0.195	0.117	0.117	0.049	0.05
267.004	0.316	0	0.318	0	0.304	0.299	0.276	0.276	0.192	0.195	0.116	0.117	0.05	0.05
267.204	0.314	0	0.318	0	0.3	0.299	0.272	0.276	0.193	0.195	0.119	0.117	0.053	0.05
267.404	0.307	0	0.323	0	0.294	0.299	0.27	0.276	0.189	0.195	0.114	0.117	0.051	0.05
267.604	0.316	0	0.327	0	0.305	0.299	0.28	0.276	0.195	0.195	0.115	0.117	0.053	0.05
267.804	0.319	0	0.328	0	0.307	0.299	0.28	0.276	0.202	0.195	0.123	0.117	0.058	0.05
268.004	0.307	0	0.316	0	0.299	0.299	0.269	0.276	0.188	0.195	0.115	0.117	0.045	0.05
268.204	0.31	0	0.319	0	0.296	0.299	0.269	0.276	0.187	0.195	0.113	0.117	0.044	0.05
268.404	0.309	0	0.316	0	0.295	0.299	0.271	0.276	0.189	0.195	0.117	0.117	0.053	0.05
268.604	0.315	0	0.319	0	0.296	0.299	0.275	0.276	0.191	0.195	0.117	0.117	0.048	0.05
268.804	0.316	0	0.322	0	0.299	0.299	0.281	0.276	0.197	0.195	0.115	0.117	0.056	0.05
269.004	0.313	0	0.322	0	0.298	0.299	0.278	0.276	0.2	0.195	0.115	0.117	0.055	0.05
269.204	0.31	0	0.32	0	0.3	0.299	0.273	0.276	0.192	0.195	0.122	0.117	0.048	0.05
269.404	0.31	0	0.322	0	0.296	0.299	0.274	0.276	0.193	0.195	0.117	0.117	0.05	0.05
269.604	0.316	0	0.323	0	0.303	0.299	0.275	0.276	0.194	0.195	0.117	0.117	0.055	0.05
269.804	0.317	0	0.317	0	0.298	0.299	0.278	0.276	0.191	0.195	0.121	0.117	0.048	0.05
270.004	0.309	0	0.317	0	0.298	0.299	0.27	0.276	0.187	0.195	0.112	0.117	0.05	0.05
270.204	0.31	0	0.322	0	0.296	0.299	0.274	0.276	0.192	0.195	0.114	0.117	0.049	0.05
270.404	0.314	0	0.325	0	0.303	0.299	0.279	0.276	0.193	0.195	0.12	0.117	0.057	0.05
270.604	0.31	0	0.32	0	0.298	0.299	0.271	0.276	0.188	0.195	0.115	0.117	0.049	0.05
270.804	0.311	0	0.322	0	0.295	0.299	0.273	0.276	0.192	0.195	0.118	0.117	0.047	0.05
271.004	0.31	0	0.316	0	0.295	0.299	0.273	0.276	0.193	0.195	0.114	0.117	0.049	0.05
271.204	0.314	0	0.322	0	0.299	0.299	0.276	0.275	0.19	0.195	0.112	0.117	0.052	0.05
271.404	0.305	0	0.316	0	0.295	0.299	0.276	0.275	0.187	0.195	0.11	0.117	0.049	0.05
271.604	0.312	0	0.32	0	0.302	0.299	0.275	0.275	0.19	0.195	0.117	0.117	0.047	0.05
271.804	0.315	0	0.323	0	0.3	0.299	0.281	0.275	0.196	0.195	0.116	0.117	0.047	0.05
272.004	0.307	0	0.32	0	0.299	0.299	0.273	0.275	0.188	0.195	0.117	0.117	0.043	0.05
272.204	0.313	0	0.326	0	0.299	0.299	0.275	0.275	0.196	0.195	0.12	0.117	0.057	0.05
272.404	0.308	0	0.323	0	0.299	0.299	0.276	0.275	0.193	0.195	0.116	0.117	0.053	0.05
272.604	0.315	0	0.326	0	0.301	0.299	0.27	0.275	0.195	0.195	0.113	0.117	0.048	0.05
272.804	0.306	0	0.313	0	0.295	0.299	0.274	0.275	0.185	0.195	0.112	0.117	0.044	0.05
273.004	0.315	0	0.317	0	0.298	0.299	0.276	0.275	0.194	0.195	0.118	0.117	0.047	0.05
273.204	0.315	0	0.328	0	0.305	0.299	0.278	0.275	0.194	0.195	0.123	0.117	0.055	0.05
273.404	0.308	0	0.316	0	0.294	0.299	0.271	0.275	0.191	0.195	0.11	0.117	0.045	0.05
273.604	0.31	0	0.321	0	0.3	0.299	0.275	0.275	0.19	0.195	0.115	0.117	0.049	0.05
273.804	0.307	0	0.314	0	0.298	0.299	0.277	0.275	0.193	0.195	0.114	0.117	0.047	0.05
274.004	0.307	0	0.321	0	0.298	0.299	0.277	0.275	0.192	0.195	0.115	0.117	0.048	0.05
274.204	0.313	0	0.321	0	0.305	0.299	0.275	0.275	0.195	0.195	0.117	0.117	0.053	0.05
274.404	0.309	0	0.318	0	0.3	0.299	0.275	0.275	0.192	0.195	0.116	0.117	0.051	0.05
274.604	0.316	0	0.321	0	0.302	0.299	0.276	0.275	0.195	0.195	0.119	0.117	0.052	0.05
274.804	0.312	0	0.317	0	0.297	0.299	0.273	0.275	0.195	0.195	0.119	0.117	0.048	0.05
275.004	0.315	0	0.321	0	0.305	0.299	0.278	0.275	0.2	0.195	0.118	0.117	0.054	0.05
275.204	0.301	0	0.315	0	0.3	0.299	0.273	0.275	0.194	0.195	0.114	0.117	0.049	0.05
275.404	0.31	0	0.313	0	0.297	0.299	0.272	0.275	0.191	0.195	0.113	0.117	0.046	0.05
275.604	0.307	0	0.32	0	0.296	0.298	0.274	0.275	0.189	0.194	0.115	0.117	0.047	0.05
275.804	0.316	0	0.323	0	0.301	0.298	0.272	0.275	0.197	0.194	0.121	0.117	0.053	0.05
276.004	0.307	0	0.318	0	0.296	0.298	0.271	0.275	0.191	0.194	0.114	0.117	0.051	0.05
276.204	0.316	0	0.32	0	0.301	0.298	0.275	0.275	0.19	0.194	0.117	0.117	0.05	0.05
276.404	0.311	0	0.324	0	0.303	0.298	0.275	0.275	0.195	0.194	0.117	0.117	0.053	0.05
276.604	0.315	0	0.317	0	0.3	0.298	0.272	0.275	0.187	0.194	0.117	0.117	0.047	0.05
276.804	0.31	0	0.317	0	0.3	0.298	0.275	0.275	0.191	0.194	0.115	0.117	0.048	0.05
277.004	0.314	0	0.319	0	0.3	0.298	0.275	0.275	0.193	0.194	0.116	0.117	0.049	0.05
277.204	0.306	0	0.318	0	0.297	0.298	0.272	0.275	0.193	0.194	0.118	0.117	0.048	0.05
277.404	0.314	0	0.315	0	0.304	0.298	0.279	0.275	0.189	0.194	0.117	0.117	0.05	0.05
277.604	0.305	0	0.315	0	0.292	0.298	0.269	0.275	0.192	0.194	0.11	0.117	0.04	0.05
277.804	0.312	0	0.328	0	0.299	0.298	0.275	0.275	0.191	0.194	0.118	0.117	0.053	0.05
278.004	0.317	0	0.321	0	0.304	0.298	0.274	0.275	0.198	0.194	0.12	0.117	0.051	0.05
278.204	0.308	0	0.318	0	0.293	0.298	0.267	0.275	0.19	0.194	0.118	0.117	0.049	0.05
278.404	0.305	0	0.314	0	0.294	0.298	0.277	0.275	0.191	0.194	0.116	0.117	0.047	0.05
278.604	0.315	0	0.32	0	0.299	0.298	0.275	0.275	0.193	0.194	0.122	0.117	0.052	0.05
278.804	0.313	0	0.322	0	0.296	0.298	0.274	0.275	0.194	0.194	0.12	0.117	0.049	0.05
279.004	0.316	0	0.321	0	0.299	0.298	0.275	0.275	0.189	0.194	0.12	0.117	0.054	0.05
279.204	0.309	0	0.317	0	0.295	0.298	0.267	0.275	0.184	0.194	0.11	0.117	0.046	0.05
279.404	0.316	0	0.316	0	0.294	0.298	0.274	0.275	0.185	0.194	0.116	0.117	0.046	0.05
279.604	0.304	0	0.315	0	0.297	0.298	0.269	0.275	0.187	0.194	0.109	0.117	0.046	0.05
279.804	0.31	0	0.323	0	0.304	0.298	0.28	0.275	0.199	0.194	0.122	0.117	0.057	0.05
280.004	0.319	0	0.325	0	0.301	0.298	0.275	0.275	0.195	0.194	0.12	0.117	0.053	0.05
280.204	0.313	0	0.32	0	0.301	0.298	0.276	0.275	0.193	0.194	0.118	0.117	0.053	0.05
280.404	0.315	0	0.319	0	0.303	0.298	0.278	0.275	0.195	0.194	0.122	0.117	0.052	0.05
280.604	0.308	0	0.32	0	0.298	0.298	0.275	0.275	0.19	0.194	0.121	0.117	0.053	0.05
280.804	0.314	0	0.323	0	0.304	0.298	0.278	0.275	0.196	0.194	0.12	0.117	0.054	0.05
281.004	0.311	0	0.326	0	0.299	0.298	0.275	0.275	0.19	0.194	0.117	0.117	0.053	0.05
281.204	0.31	0	0.321	0	0.298	0.298	0.274	0.275	0.192	0.194	0.122	0.117	0.051	0.05
281.404	0.311	0	0.318	0	0.3	0.298	0.276	0.275	0.193	0.194	0.114	0.116	0.051	0.05
281.604	0.31	0	0.321	0	0.295	0.298	0.281	0.275	0.192	0.194	0.119	0.116	0.051	0.05
281.804	0.307	0	0.311	0	0.292	0.298	0.266	0.275	0.186	0.194	0.108	0.116	0.043	0.05
282.004	0.311	0	0.321	0	0.298	0.298	0.269	0.275	0.189	0.194	0.112	0.116	0.05	0.05
282.204	0.31	0	0.32	0	0.302	0.298	0.273	0.275	0.196	0.194	0.12	0.116	0.054	0.05
282.404	0.315	0	0.327	0	0.299	0.298	0.278	0.274	0.193	0.194	0.118	0.116	0.055	0.05
282.604	0.31	0	0.32	0	0.298	0.298	0.271	0.274	0.193	0.194	0.121	0.116	0.05	0.05
282.804	0.321	0	0.326	0	0.306	0.298	0.275	0.274	0.198	0.194	0.126	0.116	0.058	0.05
283.004	0.311	0	0.321	0	0.3	0.298	0.273	0.274	0.192	0.194	0.116	0.116	0.054	0.05
283.204	0.313	0	0.319	0	0.299	0.298	0.271	0.274	0.19	0.194	0.114	0.116	0.046	0.05
283.404	0.311	0	0.321	0	0.301	0.298	0.269	0.274	0.191	0.194	0.115	0.116	0.048	0.05
283.604	0.304	0	0.325	0	0.298	0.298	0.27	0.274	0.193	0.194	0.119	0.116	0.047	0.05
283.804	0.315	0	0.326	0	0.299	0.298	0.276	0.274	0.196	0.194	0.117	0.116	0.05	0.05
284.004	0.314	0	0.321	0	0.3	0.298	0.272	0.274	0.195	0.194	0.117	0.116	0.051	0.05
284.204	0.311	0	0.321	0	0.297	0.298	0.275	0.274	0.193	0.194	0.116	0.116	0.048	0.05
284.404	0.317	0	0.323	0	0.3	0.298	0.278	0.274	0.197	0.194	0.119	0.116	0.058	0.05
284.604	0.313	0	0.321	0	0.298	0.298	0.274	0.274	0.196	0.194	0.119	0.116	0.052	0.05
284.804	0.312	0	0.323	0	0.3	0.298	0.277	0.274	0.191	0.194	0.12	0.116	0.052	0.05
285.004	0.315	0	0.317	0	0.302	0.298	0.273	0.274	0.193	0.194	0.118	0.116	0.052	0.05
285.204	0.305	0	0.316	0	0.301	0.298	0.27	0.274	0.198	0.194	0.111	0.116	0.045	0.05
285.404	0.311	0	0.319	0	0.295	0.298	0.277	0.274	0.193	0.194	0.114	0.116	0.051	0.05
285.604	0.312	0	0.314	0	0.3	0.297	0.274	0.274	0.193	0.194	0.117	0.116	0.049	0.05
285.804	0.311	0	0.317	0	0.298	0.297	0.275	0.274	0.194	0.194	0.118	0.116	0.05	0.05
286.004	0.308	0	0.32	0	0.297	0.297	0.272	0.274	0.193	0.194	0.116	0.116	0.054	0.05
286.204	0.311	0	0.318	0	0.298	0.297	0.271	0.274	0.194	0.194	0.117	0.116	0.051	0.05
286.404	0.316	0	0.323	0	0.3	0.297	0.277	0.274	0.196	0.194	0.119	0.116	0.052	0.05
286.604	0.307	0	0.317	0	0.299	0.297	0.281	0.274	0.192	0.194	0.12	0.116	0.051	0.05
286.804	0.304	0	0.315	0	0.299	0.297	0.272	0.274	0.189	0.194	0.11	0.116	0.048	0.05
287.004	0.313	0	0.321	0	0.298	0.297	0.273	0.274	0.197	0.194	0.119	0.116	0.045	0.05
287.204	0.317	0	0.322	0	0.306	0.297	0.277	0.274	0.201	0.194	0.12	0.116	0.055	0.05
287.404	0.309	0	0.32	0	0.295	0.297	0.274	0.274	0.191	0.194	0.119	0.116	0.053	0.05
287.604	0.31	0	0.321	0	0.3	0.297	0.274	0.274	0.193	0.194	0.12	0.116	0.052	0.05
287.804	0.314	0	0.322	0	0.296	0.297	0.278	0.274	0.195	0.194	0.119	0.116	0.046	0.05
288.004	0.311	0	0.314	0	0.295	0.297	0.273	0.274	0.196	0.194	0.117	0.116	0.054	0.05
288.204	0.314	0	0.317	0	0.301	0.297	0.276	0.274	0.194	0.194	0.122	0.116	0.054	0.05
288.404	0.314	0	0.32	0	0.302	0.297	0.275	0.274	0.202	0.194	0.116	0.116	0.052	0.05
288.604	0.306	0	0.314	0	0.297	0.297	0.271	0.274	0.192	0.194	0.118	0.116	0.048	0.05
288.804	0.307	0	0.317	0	0.293	0.297	0.271	0.274	0.196	0.194	0.119	0.116	0.05	0.05
289.004	0.314	0	0.32	0	0.299	0.297	0.272	0.274	0.187	0.194	0.123	0.116	0.049	0.05
289.204	0.308	0	0.317	0	0.296	0.297	0.269	0.274	0.191	0.194	0.108	0.116	0.05	0.05
289.404	0.311	0	0.32	0	0.296	0.297	0.269	0.274	0.192	0.194	0.115	0.116	0.05	0.05
289.604	0.307	0	0.317	0	0.298	0.297	0.271	0.274	0.186	0.194	0.112	0.116	0.044	0.05
289.804	0.309	0	0.316	0	0.297	0.297	0.275	0.274	0.191	0.194	0.113	0.116	0.047	0.05
290.004	0.309	0	0.317	0	0.294	0.297	0.273	0.274	0.193	0.194	0.118	0.116	0.057	0.05
290.204	0.307	0	0.323	0	0.298	0.297	0.278	0.274	0.195	0.194	0.119	0.116	0.055	0.05
290.404	0.311	0	0.322	0	0.3	0.297	0.279	0.274	0.194	0.194	0.116	0.116	0.049	0.05
290.604	0.307	0	0.317	0	0.297	0.297	0.269	0.274	0.189	0.194	0.11	0.116	0.048	0.05
290.804	0.307	0	0.315	0	0.298	0.297	0.272	0.274	0.192	0.194	0.117	0.116	0.047	0.05
291.004	0.306	0	0.312	0	0.293	0.297	0.269	0.274	0.19	0.194	0.116	0.116	0.045	0.05
291.204	0.306	0	0.318	0	0.301	0.297	0.27	0.274	0.191	0.194	0.116	0.116	0.049	0.05
291.404	0.307	0	0.308	0	0.296	0.297	0.269	0.274	0.194	0.194	0.112	0.116	0.045	0.05
291.604	0.31	0	0.315	0	0.297	0.297	0.27	0.274	0.193	0.194	0.117	0.116	0.049	0.05
291.804	0.309	0	0.321	0	0.303	0.297	0.276	0.274	0.191	0.194	0.112	0.116	0.046	0.05
292.004	0.305	0	0.317	0	0.294	0.297	0.267	0.274	0.189	0.194	0.113	0.116	0.048	0.05
292.204	0.307	0	0.32	0	0.293	0.297	0.269	0.274	0.189	0.194	0.115	0.116	0.044	0.05
292.404	0.307	0	0.316	0	0.294	0.297	0.27	0.274	0.191	0.194	0.114	0.116	0.046	0.05
292.604	0.31	0	0.315	0	0.294	0.297	0.274	0.274	0.192	0.194	0.117	0.116	0.047	0.05
292.804	0.309	0	0.323	0	0.301	0.297	0.276	0.274	0.198	0.193	0.119	0.116	0.053	0.05
293.004	0.313	0	0.319	0	0.302	0.297	0.278	0.274	0.193	0.193	0.116	0.116	0.054	0.05
293.204	0.304	0	0.314	0	0.292	0.297	0.272	0.274	0.183	0.193	0.111	0.116	0.052	0.05
293.404	0.311	0	0.317	0	0.297	0.297	0.271	0.274	0.19	0.193	0.113	0.116	0.054	0.05
293.604	0.308	0	0.318	0	0.294	0.297	0.273	0.274	0.193	0.193	0.112	0.116	0.047	0.05
293.804	0.304	0	0.312	0	0.291	0.297	0.265	0.273	0.186	0.193	0.118	0.116	0.045	0.05
294.004	0.31	0	0.315	0	0.296	0.297	0.27	0.273	0.194	0.193	0.112	0.116	0.051	0.05
294.204	0.303	0	0.315	0	0.297	0.297	0.272	0.273	0.196	0.193	0.111	0.116	0.048	0.05
294.404	0.306	0	0.314	0	0.292	0.297	0.273	0.273	0.19	0.193	0.116	0.116	0.046	0.05
294.604	0.306	0	0.312	0	0.295	0.297	0.273	0.273	0.188	0.193	0.114	0.116	0.046	0.05
294.804	0.307	0	0.318	0	0.293	0.297	0.276	0.273	0.186	0.193	0.115	0.116	0.049	0.05
295.004	0.314	0	0.32	0	0.297	0.297	0.274	0.273	0.196	0.193	0.119	0.116	0.054	0.05
295.204	0.309	0	0.315	0	0.297	0.297	0.275	0.273	0.19	0.193	0.117	0.116	0.05	0.05
295.404	0.312	0	0.319	0	0.297	0.297	0.276	0.273	0.192	0.193	0.113	0.116	0.049	0.05
295.604	0.305	0	0.315	0	0.296	0.297	0.269	0.273	0.19	0.193	0.119	0.116	0.049	0.05
295.804	0.306	0	0.317	0	0.297	0.296	0.273	0.273	0.195	0.193	0.116	0.116	0.055	0.05
296.004	0.308	0	0.318	0	0.297	0.296	0.269	0.273	0.191	0.193	0.116	0.116	0.051	0.05
296.204	0.301	0	0.316	0	0.293	0.296	0.269	0.273	0.191	0.193	0.111	0.116	0.05	0.05
296.404	0.308	0	0.317	0	0.299	0.296	0.278	0.273	0.191	0.193	0.117	0.116	0.044	0.05
296.604	0.304	0	0.309	0	0.294	0.296	0.269	0.273	0.19	0.193	0.114	0.116	0.047	0.05
296.804	0.304	0	0.319	0	0.292	0.296	0.27	0.273	0.194	0.193	0.116	0.116	0.051	0.05
297.004	0.311	0	0.318	0	0.293	0.296	0.273	0.273	0.192	0.193	0.116	0.116	0.049	0.05
297.204	0.307	0	0.317	0	0.293	0.296	0.268	0.273	0.188	0.193	0.118	0.116	0.045	0.05
297.404	0.308	0	0.311	0	0.298	0.296	0.27	0.273	0.187	0.193	0.114	0.116	0.05	0.05
297.604	0.306	0	0.318	0	0.298	0.296	0.271	0.273	0.193	0.193	0.114	0.116	0.052	0.05
297.804	0.308	0	0.309	0	0.296	0.296	0.268	0.273	0.19	0.193	0.112	0.116	0.049	0.05
298.004	0.304	0	0.314	0	0.298	0.296	0.269	0.273	0.191	0.193	0.114	0.116	0.047	0.05
298.204	0.311	0	0.321	0	0.301	0.296	0.279	0.273	0.192	0.193	0.121	0.116	0.055	0.05
298.404	0.303	0	0.314	0	0.29	0.296	0.268	0.273	0.182	0.193	0.113	0.116	0.049	0.05
298.604	0.303	0	0.316	0	0.295	0.296	0.27	0.273	0.187	0.193	0.115	0.116	0.052	0.05
298.804	0.309	0	0.316	0	0.298	0.296	0.273	0.273	0.19	0.193	0.117	0.116	0.052	0.05
299.004	0.301	0	0.317	0	0.297	0.296	0.271	0.273	0.191	0.193	0.108	0.116	0.047	0.05
299.204	0.309	0	0.315	0	0.296	0.296	0.268	0.273	0.195	0.193	0.113	0.116	0.046	0.05
299.404	0.308	0	0.32	0	0.301	0.296	0.274	0.273	0.195	0.193	0.118	0.116	0.053	0.05
299.604	0.307	0	0.319	0	0.295	0.296	0.276	0.273	0.189	0.193	0.115	0.116	0.052	0.05
299.804	0.311	0	0.316	0	0.299	0.296	0.271	0.273	0.197	0.193	0.117	0.116	0.057	0.05
300.004	0.306	0	0.322	0	0.301	0.296	0.276	0.273	0.192	0.193	0.116	0.116	0.051	0.05
300.204	0.315	0	0.32	0	0.294	0.296	0.273	0.273	0.198	0.193	0.118	0.116	0.049	0.05
300.404	0.309	0	0.312	0	0.297	0.296	0.272	0.273	0.194	0.193	0.114	0.116	0.052	0.05
300.604	0.306	0	0.317	0	0.294	0.296	0.273	0.273	0.187	0.193	0.113	0.116	0.047	0.05
300.804	0.309	0	0.318	0	0.296	0.296	0.277	0.273	0.194	0.193	0.12	0.116	0.051	0.05
301.004	0.31	0	0.319	0	0.293	0.296	0.271	0.273	0.192	0.193	0.117	0.116	0.052	0.05
301.204	0.306	0	0.315	0	0.292	0.296	0.273	0.273	0.188	0.193	0.116	0.116	0.046	0.05
301.404	0.311	0	0.324	0	0.301	0.296	0.275	0.273	0.202	0.193	0.121	0.116	0.054	0.05
301.604	0.301	0	0.317	0	0.288	0.296	0.268	0.273	0.191	0.193	0.11	0.116	0.047	0.05
301.804	0.312	0	0.321	0	0.296	0.296	0.272	0.273	0.195	0.193	0.117	0.116	0.05	0.05
302.004	0.306	0	0.322	0	0.301	0.296	0.274	0.273	0.198	0.193	0.122	0.116	0.053	0.05
302.204	0.307	0	0.322	0	0.294	0.296	0.277	0.273	0.193	0.193	0.113	0.116	0.053	0.05
302.404	0.308	0	0.317	0	0.293	0.296	0.27	0.273	0.191	0.193	0.111	0.116	0.047	0.05
302.604	0.307	0	0.312	0	0.293	0.296	0.272	0.273	0.193	0.193	0.116	0.116	0.05	0.05
302.804	0.309	0	0.318	0	0.3	0.296	0.277	0.273	0.193	0.193	0.118	0.116	0.049	0.05
303.004	0.309	0	0.315	0	0.297	0.296	0.27	0.273	0.192	0.193	0.117	0.116	0.049	0.05
303.204	0.306	0	0.321	0	0.298	0.296	0.27	0.273	0.191	0.193	0.117	0.116	0.049	0.05
303.404	0.308	0	0.312	0	0.293	0.296	0.273	0.273	0.192	0.193	0.114	0.116	0.046	0.05
303.604	0.307	0	0.314	0	0.297	0.296	0.273	0.273	0.194	0.193	0.115	0.116	0.052	0.05
303.804	0.303	0	0.309	0	0.29	0.296	0.268	0.273	0.182	0.193	0.115	0.116	0.045	0.05
304.004	0.307	0	0.317	0	0.295	0.296	0.27	0.273	0.195	0.193	0.117	0.116	0.056	0.05
304.204	0.303	0	0.317	0	0.291	0.296	0.272	0.273	0.189	0.193	0.115	0.116	0.047	0.05
304.404	0.308	0	0.316	0	0.298	0.296	0.272	0.273	0.195	0.193	0.118	0.116	0.053	0.05
304.604	0.308	0	0.32	0	0.298	0.296	0.275	0.273	0.196	0.193	0.118	0.116	0.049	0.05
304.804	0.308	0	0.32	0	0.297	0.296	0.267	0.273	0.195	0.193	0.115	0.116	0.054	0.05
305.004	0.308	0	0.314	0	0.298	0.296	0.271	0.273	0.19	0.193	0.117	0.116	0.056	0.05
305.204	0.31	0	0.314	0	0.298	0.296	0.272	0.273	0.191	0.193	0.115	0.116	0.053	0.05
305.404	0.298	0	0.315	0	0.287	0.296	0.268	0.273	0.188	0.193	0.113	0.116	0.046	0.05
305.604	0.317	0	0.32	0	0.3	0.296	0.28	0.272	0.2	0.193	0.123	0.116	0.064	0.05
305.804	0.305	0	0.311	0	0.288	0.296	0.267	0.272	0.189	0.193	0.112	0.116	0.046	0.05
306.004	0.307	0	0.317	0	0.295	0.296	0.271	0.272	0.191	0.193	0.118	0.116	0.057	0.05
306.204	0.31	0	0.316	0	0.296	0.296	0.273	0.272	0.19	0.193	0.118	0.116	0.052	0.05
306.404	0.303	0	0.311	0	0.29	0.295	0.266	0.272	0.194	0.193	0.114	0.116	0.048	0.05
306.604	0.309	0	0.318	0	0.294	0.295	0.27	0.272	0.191	0.193	0.119	0.116	0.054	0.05
306.804	0.307	0	0.319	0	0.294	0.295	0.268	0.272	0.184	0.193	0.115	0.116	0.051	0.05
307.004	0.302	0	0.313	0	0.289	0.295	0.265	0.272	0.185	0.193	0.109	0.116	0.051	0.05
307.204	0.303	0	0.315	0	0.291	0.295	0.27	0.272	0.187	0.193	0.114	0.116	0.049	0.05
307.404	0.311	0	0.313	0	0.296	0.295	0.269	0.272	0.187	0.193	0.114	0.116	0.047	0.05
307.604	0.305	0	0.316	0	0.294	0.295	0.268	0.272	0.191	0.193	0.118	0.116	0.047	0.05
307.804	0.304	0	0.314	0	0.295	0.295	0.267	0.272	0.186	0.193	0.115	0.116	0.047	0.05
308.004	0.307	0	0.317	0	0.294	0.295	0.269	0.272	0.19	0.193	0.118	0.116	0.05	0.05
308.204	0.306	0	0.321	0	0.3	0.295	0.274	0.272	0.194	0.193	0.114	0.116	0.053	0.05
308.404	0.301	0	0.31	0	0.286	0.295	0.27	0.272	0.184	0.193	0.109	0.116	0.043	0.05
308.604	0.301	0	0.318	0	0.297	0.295	0.269	0.272	0.19	0.193	0.113	0.116	0.052	0.049
308.804	0.306	0	0.322	0	0.292	0.295	0.274	0.272	0.194	0.193	0.115	0.116	0.047	0.049
309.004	0.308	0	0.316	0	0.296	0.295	0.272	0.272	0.19	0.193	0.113	0.116	0.054	0.049
309.204	0.309	0	0.323	0	0.3	0.295	0.277	0.272	0.196	0.193	0.122	0.116	0.057	0.049
309.404	0.306	0	0.307	0	0.294	0.295	0.266	0.272	0.187	0.193	0.111	0.116	0.046	0.049
309.604	0.316	0	0.317	0	0.302	0.295	0.274	0.272	0.19	0.193	0.119	0.116	0.052	0.049
309.804	0.306	0	0.315	0	0.299	0.295	0.278	0.272	0.188	0.193	0.109	0.116	0.054	0.049
310.004	0.306	0	0.313	0	0.295	0.295	0.267	0.272	0.189	0.192	0.112	0.116	0.045	0.049
310.204	0.302	0	0.319	0	0.295	0.295	0.272	0.272	0.187	0.192	0.116	0.115	0.046	0.049
310.404	0.303	0	0.319	0	0.292	0.295	0.267	0.272	0.187	0.192	0.115	0.115	0.045	0.049
310.604	0.308	0	0.312	0	0.292	0.295	0.271	0.272	0.187	0.192	0.115	0.115	0.048	0.049
310.804	0.311	0	0.316	0	0.291	0.295	0.269	0.272	0.193	0.192	0.118	0.115	0.049	0.049
311.004	0.306	0	0.311	0	0.294	0.295	0.265	0.272	0.19	0.192	0.115	0.115	0.053	0.049
311.204	0.303	0	0.309	0	0.294	0.295	0.267	0.272	0.189	0.192	0.114	0.115	0.05	0.049
311.404	0.313	0	0.32	0	0.298	0.295	0.278	0.272	0.196	0.192	0.12	0.115	0.048	0.049
311.604	0.309	0	0.316	0	0.298	0.295	0.27	0.272	0.186	0.192	0.118	0.115	0.049	0.049
311.804	0.302	0	0.309	0	0.293	0.295	0.264	0.272	0.184	0.192	0.108	0.115	0.042	0.049
312.004	0.304	0	0.314	0	0.299	0.295	0.269	0.272	0.194	0.192	0.117	0.115	0.048	0.049
312.204	0.302	0	0.316	0	0.296	0.295	0.266	0.272	0.191	0.192	0.115	0.115	0.049	0.049
312.404	0.301	0	0.313	0	0.292	0.295	0.275	0.272	0.194	0.192	0.113	0.115	0.051	0.049
312.604	0.307	0	0.32	0	0.297	0.295	0.275	0.272	0.19	0.192	0.121	0.115	0.05	0.049
312.804	0.303	0	0.311	0	0.291	0.295	0.266	0.272	0.184	0.192	0.109	0.115	0.04	0.049
313.004	0.308	0	0.32	0	0.298	0.295	0.271	0.272	0.191	0.192	0.116	0.115	0.05	0.049
313.204	0.309	0	0.318	0	0.299	0.295	0.273	0.272	0.188	0.192	0.115	0.115	0.053	0.049
313.404	0.307	0	0.32	0	0.295	0.295	0.268	0.272	0.189	0.192	0.116	0.115	0.05	0.049
313.604	0.31	0	0.319	0	0.293	0.295	0.267	0.272	0.194	0.192	0.111	0.115	0.049	0.049
313.804	0.307	0	0.309	0	0.292	0.295	0.27	0.272	0.187	0.192	0.113	0.115	0.045	0.049
314.004	0.306	0	0.314	0	0.296	0.295	0.27	0.272	0.192	0.192	0.117	0.115	0.048	0.049
314.204	0.314	0	0.324	0	0.292	0.295	0.278	0.272	0.198	0.192	0.12	0.115	0.053	0.049
314.404	0.314	0	0.318	0	0.298	0.295	0.27	0.272	0.19	0.192	0.124	0.115	0.057	0.049
314.604	0.31	0	0.312	0	0.296	0.295	0.268	0.272	0.192	0.192	0.114	0.115	0.046	0.049
314.804	0.304	0	0.311	0	0.289	0.295	0.264	0.272	0.188	0.192	0.108	0.115	0.044	0.049
315.004	0.303	0	0.309	0	0.291	0.295	0.27	0.272	0.189	0.192	0.114	0.115	0.049	0.049
315.204	0.307	0	0.316	0	0.294	0.295	0.271	0.272	0.193	0.192	0.12	0.115	0.054	0.049
315.404	0.307	0	0.315	0	0.292	0.295	0.266	0.272	0.191	0.192	0.113	0.115	0.049	0.049
315.604	0.308	0	0.319	0	0.294	0.295	0.276	0.272	0.193	0.192	0.113	0.115	0.049	0.049
315.804	0.309	0	0.317	0	0.295	0.295	0.267	0.272	0.187	0.192	0.115	0.115	0.049	0.049
316.004	0.312	0	0.313	0	0.302	0.295	0.274	0.272	0.198	0.192	0.115	0.115	0.051	0.049
316.204	0.312	0	0.32	0	0.302	0.295	0.266	0.272	0.191	0.192	0.116	0.115	0.055	0.049
316.404	0.303	0	0.312	0	0.295	0.295	0.268	0.272	0.191	0.192	0.116	0.115	0.044	0.049
316.604	0.306	0	0.322	0	0.293	0.295	0.272	0.272	0.191	0.192	0.125	0.115	0.054	0.049
316.804	0.302	0	0.311	0	0.289	0.295	0.274	0.272	0.191	0.192	0.11	0.115	0.045	0.049
317.004	0.305	0	0.315	0	0.292	0.295	0.27	0.272	0.188	0.192	0.111	0.115	0.054	0.049
317.204	0.305	0	0.317	0	0.294	0.294	0.272	0.272	0.192	0.192	0.118	0.115	0.048	0.049
317.404	0.309	0	0.313	0	0.299	0.294	0.274	0.271	0.192	0.192	0.121	0.115	0.055	0.049
317.604	0.304	0	0.311	0	0.291	0.294	0.269	0.271	0.184	0.192	0.113	0.115	0.052	0.049
317.804	0.306	0	0.315	0	0.287	0.294	0.269	0.271	0.186	0.192	0.119	0.115	0.048	0.049
318.004	0.304	0	0.312	0	0.294	0.294	0.271	0.271	0.19	0.192	0.113	0.115	0.051	0.049
318.204	0.306	0	0.312	0	0.295	0.294	0.267	0.271	0.185	0.192	0.115	0.115	0.045	0.049
318.404	0.304	0	0.308	0	0.29	0.294	0.268	0.271	0.186	0.192	0.114	0.115	0.048	0.049
318.604	0.3	0	0.315	0	0.291	0.294	0.268	0.271	0.189	0.192	0.114	0.115	0.048	0.049
318.804	0.307	0	0.31	0	0.29	0.294	0.269	0.271	0.193	0.192	0.117	0.115	0.044	0.049
319.004	0.305	0	0.31	0	0.292	0.294	0.269	0.271	0.194	0.192	0.122	0.115	0.053	0.049
319.204	0.304	0	0.314	0	0.29	0.294	0.27	0.271	0.188	0.192	0.116	0.115	0.049	0.049
319.404	0.304	0	0.313	0	0.288	0.294	0.269	0.271	0.19	0.192	0.11	0.115	0.047	0.049
319.604	0.301	0	0.311	0	0.286	0.294	0.267	0.271	0.187	0.192	0.113	0.115	0.047	0.049
319.804	0.306	0	0.308	0	0.29	0.294	0.265	0.271	0.188	0.192	0.111	0.115	0.054	0.049
320.004	0.308	0	0.315	0	0.292	0.294	0.27	0.271	0.191	0.192	0.115	0.115	0.053	0.049
320.204	0.305	0	0.309	0	0.293	0.294	0.265	0.271	0.184	0.192	0.115	0.115	0.048	0.049
320.404	0.306	0	0.307	0	0.293	0.294	0.268	0.271	0.185	0.192	0.112	0.115	0.048	0.049
320.604	0.307	0	0.317	0	0.301	0.294	0.273	0.271	0.195	0.192	0.116	0.115	0.052	0.049
320.804	0.31	0	0.319	0	0.292	0.294	0.271	0.271	0.191	0.192	0.115	0.115	0.05	0.049
321.004	0.308	0	0.308	0	0.288	0.294	0.264	0.271	0.19	0.192	0.112	0.115	0.049	0.049
321.204	0.306	0	0.319	0	0.294	0.294	0.274	0.271	0.192	0.192	0.116	0.115	0.055	0.049
321.404	0.304	0	0.312	0	0.287	0.294	0.265	0.271	0.188	0.192	0.11	0.115	0.05	0.049
321.604	0.305	0	0.317	0	0.295	0.294	0.269	0.271	0.192	0.192	0.115	0.115	0.051	0.049
321.804	0.307	0	0.31	0	0.291	0.294	0.272	0.271	0.191	0.192	0.115	0.115	0.053	0.049
322.004	0.308	0	0.32	0	0.298	0.294	0.272	0.271	0.193	0.192	0.116	0.115	0.054	0.049
322.204	0.309	0	0.321	0	0.294	0.294	0.273	0.271	0.195	0.192	0.122	0.115	0.051	0.049
322.404	0.315	0	0.319	0	0.297	0.294	0.273	0.271	0.195	0.192	0.119	0.115	0.052	0.049
322.604	0.311	0	0.32	0	0.295	0.294	0.269	0.271	0.197	0.192	0.118	0.115	0.049	0.049
322.804	0.306	0	0.315	0	0.293	0.294	0.271	0.271	0.191	0.192	0.119	0.115	0.049	0.049
323.004	0.308	0	0.319	0	0.297	0.294	0.274	0.271	0.196	0.192	0.116	0.115	0.053	0.049
323.204	0.309	0	0.317	0	0.297	0.294	0.271	0.271	0.191	0.192	0.117	0.115	0.05	0.049
323.404	0.307	0	0.315	0	0.296	0.294	0.274	0.271	0.189	0.192	0.117	0.115	0.051	0.049
323.604	0.301	0	0.316	0	0.294	0.294	0.264	0.271	0.191	0.192	0.113	0.115	0.05	0.049
323.804	0.306	0	0.312	0	0.291	0.294	0.271	0.271	0.19	0.192	0.118	0.115	0.048	0.049
324.004	0.309	0	0.316	0	0.292	0.294	0.269	0.271	0.19	0.192	0.117	0.115	0.049	0.049
324.204	0.311	0	0.317	0	0.292	0.294	0.268	0.271	0.193	0.192	0.117	0.115	0.05	0.049
324.404	0.306	0	0.309	0	0.291	0.294	0.268	0.271	0.188	0.192	0.109	0.115	0.049	0.049
324.604	0.304	0	0.305	0	0.29	0.294	0.268	0.271	0.182	0.192	0.11	0.115	0.041	0.049
324.804	0.302	0	0.312	0	0.292	0.294	0.268	0.271	0.188	0.192	0.114	0.115	0.048	0.049
325.004	0.306	0	0.317	0	0.296	0.294	0.277	0.271	0.189	0.192	0.123	0.115	0.054	0.049
325.204	0.302	0	0.312	0	0.293	0.294	0.267	0.271	0.189	0.192	0.116	0.115	0.048	0.049
325.404	0.302	0	0.314	0	0.292	0.294	0.271	0.271	0.185	0.192	0.11	0.115	0.044	0.049
325.604	0.31	0	0.315	0	0.297	0.294	0.271	0.271	0.19	0.192	0.117	0.115	0.054	0.049
325.804	0.306	0	0.318	0	0.293	0.294	0.27	0.271	0.186	0.192	0.117	0.115	0.049	0.049
326.004	0.307	0	0.318	0	0.292	0.294	0.267	0.271	0.191	0.192	0.115	0.115	0.047	0.049
326.204	0.303	0	0.309	0	0.288	0.294	0.267	0.271	0.184	0.192	0.112	0.115	0.048	0.049
326.404	0.304	0	0.318	0	0.291	0.294	0.271	0.271	0.194	0.192	0.116	0.115	0.047	0.049
326.604	0.302	0	0.314	0	0.292	0.294	0.269	0.271	0.19	0.192	0.113	0.115	0.052	0.049
326.804	0.304	0	0.31	0	0.288	0.294	0.265	0.271	0.186	0.192	0.108	0.115	0.047	0.049
327.004	0.308	0	0.318	0	0.295	0.294	0.265	0.271	0.192	0.192	0.113	0.115	0.049	0.049
327.204	0.309	0	0.316	0	0.291	0.294	0.272	0.271	0.197	0.192	0.114	0.115	0.049	0.049
327.404	0.31	0	0.318	0	0.293	0.294	0.275	0.271	0.197	0.191	0.119	0.115	0.048	0.049
327.604	0.31	0	0.312	0	0.295	0.294	0.276	0.271	0.19	0.191	0.117	0.115	0.048	0.049
327.804	0.306	0	0.313	0	0.292	0.294	0.269	0.271	0.192	0.191	0.122	0.115	0.048	0.049
328.004	0.299	0	0.31	0	0.289	0.294	0.267	0.271	0.182	0.191	0.11	0.115	0.045	0.049
328.204	0.305	0	0.312	0	0.29	0.293	0.269	0.271	0.185	0.191	0.114	0.115	0.049	0.049
328.404	0.31	0	0.315	0	0.297	0.293	0.275	0.271	0.192	0.191	0.119	0.115	0.052	0.049
328.604	0.303	0	0.312	0	0.291	0.293	0.274	0.271	0.192	0.191	0.113	0.115	0.053	0.049
328.804	0.302	0	0.312	0	0.292	0.293	0.271	0.271	0.188	0.191	0.113	0.115	0.052	0.049
329.004	0.303	0	0.308	0	0.289	0.293	0.263	0.271	0.182	0.191	0.114	0.115	0.046	0.049
329.204	0.303	0	0.315	0	0.29	0.293	0.268	0.271	0.191	0.191	0.115	0.115	0.053	0.049
329.404	0.302	0	0.312	0	0.286	0.293	0.267	0.27	0.19	0.191	0.114	0.115	0.052	0.049
329.604	0.312	0	0.324	0	0.295	0.293	0.278	0.27	0.193	0.191	0.12	0.115	0.055	0.049
329.804	0.307	0	0.315	0	0.3	0.293	0.272	0.27	0.196	0.191	0.119	0.115	0.053	0.049
330.004	0.299	0	0.314	0	0.288	0.293	0.268	0.27	0.19	0.191	0.113	0.115	0.046	0.049
330.204	0.309	0	0.317	0	0.295	0.293	0.273	0.27	0.194	0.191	0.121	0.115	0.055	0.049
330.404	0.3	0	0.31	0	0.29	0.293	0.269	0.27	0.184	0.191	0.11	0.115	0.052	0.049
330.604	0.302	0	0.312	0	0.29	0.293	0.266	0.27	0.196	0.191	0.113	0.115	0.051	0.049
330.804	0.301	0	0.312	0	0.287	0.293	0.264	0.27	0.185	0.191	0.112	0.115	0.049	0.049
331.004	0.308	0	0.316	0	0.295	0.293	0.276	0.27	0.19	0.191	0.122	0.115	0.051	0.049
331.204	0.31	0	0.315	0	0.293	0.293	0.271	0.27	0.188	0.191	0.116	0.115	0.047	0.049
331.404	0.301	0	0.314	0	0.293	0.293	0.268	0.27	0.188	0.191	0.118	0.115	0.053	0.049
331.604	0.301	0	0.312	0	0.297	0.293	0.268	0.27	0.188	0.191	0.121	0.115	0.053	0.049
331.804	0.304	0	0.315	0	0.293	0.293	0.27	0.27	0.186	0.191	0.119	0.115	0.047	0.049
332.004	0.301	0	0.309	0	0.29	0.293	0.265	0.27	0.189	0.191	0.11	0.115	0.049	0.049
332.204	0.303	0	0.314	0	0.292	0.293	0.268	0.27	0.191	0.191	0.109	0.115	0.049	0.049
332.404	0.302	0	0.313	0	0.288	0.293	0.265	0.27	0.184	0.191	0.114	0.115	0.047	0.049
332.604	0.307	0	0.313	0	0.288	0.293	0.264	0.27	0.187	0.191	0.112	0.115	0.052	0.049
332.804	0.298	0	0.311	0	0.29	0.293	0.262	0.27	0.188	0.191	0.115	0.115	0.044	0.049
333.004	0.311	0	0.314	0	0.295	0.293	0.27	0.27	0.188	0.191	0.112	0.115	0.05	0.049
333.204	0.309	0	0.311	0	0.296	0.293	0.27	0.27	0.192	0.191	0.12	0.115	0.055	0.049
333.404	0.307	0	0.314	0	0.297	0.293	0.279	0.27	0.198	0.191	0.12	0.115	0.052	0.049
333.604	0.297	0	0.313	0	0.289	0.293	0.265	0.27	0.186	0.191	0.109	0.115	0.04	0.049
333.804	0.304	0	0.314	0	0.291	0.293	0.268	0.27	0.187	0.191	0.109	0.115	0.05	0.049
334.004	0.304	0	0.32	0	0.295	0.293	0.27	0.27	0.192	0.191	0.117	0.115	0.052	0.049
334.204	0.304	0	0.319	0	0.295	0.293	0.271	0.27	0.193	0.191	0.116	0.115	0.051	0.049
334.404	0.299	0	0.312	0	0.289	0.293	0.264	0.27	0.186	0.191	0.115	0.115	0.047	0.049
334.604	0.305	0	0.315	0	0.293	0.293	0.271	0.27	0.193	0.191	0.116	0.115	0.045	0.049
334.804	0.305	0	0.309	0	0.293	0.293	0.267	0.27	0.186	0.191	0.114	0.115	0.046	0.049
335.004	0.303	0	0.313	0	0.294	0.293	0.268	0.27	0.191	0.191	0.114	0.115	0.049	0.049
335.204	0.298	0	0.305	0	0.29	0.293	0.264	0.27	0.187	0.191	0.115	0.115	0.047	0.049
335.404	0.301	0	0.312	0	0.293	0.293	0.269	0.27	0.187	0.191	0.114	0.115	0.047	0.049
335.604	0.306	0	0.31	0	0.292	0.293	0.268	0.27	0.188	0.191	0.114	0.115	0.044	0.049
335.804	0.307	0	0.31	0	0.293	0.293	0.269	0.27	0.192	0.191	0.12	0.115	0.05	0.049
336.004	0.306	0	0.315	0	0.287	0.293	0.266	0.27	0.187	0.191	0.115	0.115	0.052	0.049
336.204	0.303	0	0.308	0	0.287	0.293	0.271	0.27	0.187	0.191	0.113	0.115	0.047	0.049
336.404	0.305	0	0.309	0	0.288	0.293	0.265	0.27	0.186	0.191	0.108	0.115	0.049	0.049
336.604	0.311	0	0.321	0	0.299	0.293	0.276	0.27	0.196	0.191	0.121	0.115	0.057	0.049
336.804	0.299	0	0.305	0	0.289	0.293	0.268	0.27	0.184	0.191	0.111	0.115	0.045	0.049
337.004	0.299	0	0.316	0	0.293	0.293	0.27	0.27	0.187	0.191	0.113	0.115	0.049	0.049
337.204	0.31	0	0.319	0	0.296	0.293	0.274	0.27	0.192	0.191	0.117	0.115	0.054	0.049
337.404	0.306	0	0.307	0	0.293	0.293	0.264	0.27	0.193	0.191	0.108	0.115	0.052	0.049
337.604	0.304	0	0.312	0	0.29	0.293	0.266	0.27	0.187	0.191	0.114	0.115	0.05	0.049
337.804	0.302	0	0.313	0	0.29	0.293	0.264	0.27	0.185	0.191	0.116	0.115	0.051	0.049
338.004	0.302	0	0.314	0	0.293	0.293	0.269	0.27	0.194	0.191	0.12	0.115	0.05	0.049
338.204	0.306	0	0.316	0	0.292	0.293	0.271	0.27	0.194	0.191	0.117	0.115	0.054	0.049
338.404	0.31	0	0.318	0	0.293	0.293	0.269	0.27	0.19	0.191	0.118	0.115	0.056	0.049
338.604	0.304	0	0.309	0	0.287	0.293	0.267	0.27	0.184	0.191	0.114	0.115	0.046	0.049
338.804	0.302	0	0.318	0	0.289	0.293	0.266	0.27	0.188	0.191	0.112	0.115	0.046	0.049
339.004	0.307	0	0.318	0	0.291	0.293	0.264	0.27	0.193	0.191	0.115	0.115	0.049	0.049
339.204	0.3	0	0.309	0	0.293	0.292	0.267	0.27	0.189	0.191	0.114	0.114	0.053	0.049
339.404	0.307	0	0.311	0	0.291	0.292	0.268	0.27	0.192	0.191	0.117	0.114	0.049	0.049
339.604	0.303	0	0.31	0	0.294	0.292	0.266	0.27	0.191	0.191	0.111	0.114	0.049	0.049
339.804	0.303	0	0.31	0	0.291	0.292	0.275	0.27	0.19	0.191	0.114	0.114	0.05	0.049
340.004	0.302	0	0.31	0	0.287	0.292	0.27	0.27	0.186	0.191	0.115	0.114	0.049	0.049
340.204	0.31	0	0.314	0	0.295	0.292	0.274	0.27	0.195	0.191	0.123	0.114	0.053	0.049
340.404	0.311	0	0.314	0	0.298	0.292	0.273	0.27	0.19	0.191	0.123	0.114	0.048	0.049
340.604	0.311	0	0.322	0	0.298	0.292	0.273	0.27	0.195	0.191	0.122	0.114	0.054	0.049
340.804	0.308	0	0.316	0	0.292	0.292	0.269	0.27	0.191	0.191	0.115	0.114	0.053	0.049
341.004	0.302	0	0.311	0	0.292	0.292	0.266	0.27	0.188	0.191	0.117	0.114	0.047	0.049
341.204	0.307	0	0.316	0	0.292	0.292	0.275	0.27	0.186	0.191	0.115	0.114	0.05	0.049
341.404	0.311	0	0.315	0	0.292	0.292	0.268	0.27	0.191	0.191	0.117	0.114	0.053	0.049
341.604	0.301	0	0.309	0	0.288	0.292	0.265	0.269	0.187	0.191	0.113	0.114	0.046	0.049
341.804	0.298	0	0.31	0	0.295	0.292	0.264	0.269	0.188	0.191	0.116	0.114	0.043	0.049
342.004	0.301	0	0.311	0	0.29	0.292	0.264	0.269	0.187	0.191	0.113	0.114	0.046	0.049
342.204	0.304	0	0.312	0	0.288	0.292	0.269	0.269	0.183	0.191	0.114	0.114	0.051	0.049
342.404	0.308	0	0.316	0	0.293	0.292	0.268	0.269	0.189	0.191	0.118	0.114	0.052	0.049
342.604	0.306	0	0.313	0	0.288	0.292	0.27	0.269	0.186	0.191	0.111	0.114	0.051	0.049
342.804	0.307	0	0.309	0	0.295	0.292	0.269	0.269	0.187	0.191	0.119	0.114	0.05	0.049
343.004	0.305	0	0.311	0	0.289	0.292	0.267	0.269	0.188	0.191	0.114	0.114	0.049	0.049
343.204	0.309	0	0.316	0	0.291	0.292	0.271	0.269	0.191	0.191	0.114	0.114	0.052	0.049
343.404	0.301	0	0.312	0	0.292	0.292	0.264	0.269	0.183	0.191	0.112	0.114	0.048	0.049
343.604	0.308	0	0.315	0	0.299	0.292	0.278	0.269	0.192	0.191	0.118	0.114	0.057	0.049
343.804	0.304	0	0.315	0	0.292	0.292	0.267	0.269	0.195	0.191	0.116	0.114	0.049	0.049
344.004	0.307	0	0.309	0	0.289	0.292	0.266	0.269	0.188	0.191	0.113	0.114	0.05	0.049
344.204	0.3	0	0.31	0	0.287	0.292	0.263	0.269	0.188	0.191	0.114	0.114	0.047	0.049
344.404	0.307	0	0.313	0	0.285	0.292	0.266	0.269	0.19	0.191	0.111	0.114	0.046	0.049
344.604	0.302	0	0.311	0	0.294	0.292	0.269	0.269	0.193	0.191	0.112	0.114	0.05	0.049
344.804	0.304	0	0.313	0	0.294	0.292	0.273	0.269	0.188	0.191	0.118	0.114	0.054	0.049
345.004	0.306	0	0.317	0	0.29	0.292	0.274	0.269	0.189	0.19	0.122	0.114	0.053	0.049
345.204	0.306	0	0.315	0	0.291	0.292	0.272	0.269	0.183	0.19	0.119	0.114	0.053	0.049
345.404	0.307	0	0.315	0	0.298	0.292	0.272	0.269	0.191	0.19	0.122	0.114	0.055	0.049
345.604	0.306	0	0.311	0	0.295	0.292	0.271	0.269	0.193	0.19	0.115	0.114	0.05	0.049
345.804	0.299	0	0.305	0	0.289	0.292	0.269	0.269	0.184	0.19	0.111	0.114	0.046	0.049
346.004	0.301	0	0.313	0	0.292	0.292	0.273	0.269	0.186	0.19	0.113	0.114	0.051	0.049
346.204	0.302	0	0.31	0	0.293	0.292	0.266	0.269	0.188	0.19	0.113	0.114	0.045	0.049
346.404	0.304	0	0.31	0	0.29	0.292	0.267	0.269	0.191	0.19	0.119	0.114	0.05	0.049
346.604	0.309	0	0.319	0	0.295	0.292	0.278	0.269	0.199	0.19	0.118	0.114	0.059	0.049
346.804	0.308	0	0.317	0	0.289	0.292	0.272	0.269	0.189	0.19	0.117	0.114	0.051	0.049
347.004	0.301	0	0.316	0	0.289	0.292	0.268	0.269	0.192	0.19	0.109	0.114	0.052	0.049
347.204	0.308	0	0.313	0	0.295	0.292	0.276	0.269	0.193	0.19	0.119	0.114	0.055	0.049
347.404	0.307	0	0.317	0	0.294	0.292	0.276	0.269	0.192	0.19	0.117	0.114	0.053	0.049
347.604	0.304	0	0.311	0	0.291	0.292	0.268	0.269	0.189	0.19	0.113	0.114	0.049	0.049
347.804	0.305	0	0.315	0	0.293	0.292	0.269	0.269	0.192	0.19	0.115	0.114	0.051	0.049
348.004	0.303	0	0.319	0	0.297	0.292	0.275	0.269	0.195	0.19	0.119	0.114	0.054	0.049
348.204	0.299	0	0.308	0	0.29	0.292	0.264	0.269	0.186	0.19	0.112	0.114	0.05	0.049
348.404	0.308	0	0.315	0	0.29	0.292	0.267	0.269	0.189	0.19	0.117	0.114	0.049	0.049
348.604	0.308	0	0.315	0	0.293	0.292	0.269	0.269	0.189	0.19	0.117	0.114	0.054	0.049
348.804	0.305	0	0.314	0	0.292	0.292	0.269	0.269	0.192	0.19	0.12	0.114	0.047	0.049
349.004	0.306	0	0.313	0	0.288	0.292	0.265	0.269	0.191	0.19	0.11	0.114	0.05	0.049
349.204	0.306	0	0.314	0	0.291	0.292	0.27	0.269	0.195	0.19	0.122	0.114	0.052	0.049
349.404	0.306	0	0.312	0	0.291	0.292	0.267	0.269	0.192	0.19	0.112	0.114	0.051	0.049
349.604	0.308	0	0.316	0	0.294	0.292	0.274	0.269	0.199	0.19	0.121	0.114	0.054	0.049
349.804	0.305	0	0.317	0	0.293	0.292	0.269	0.269	0.189	0.19	0.12	0.114	0.052	0.049
350.004	0.308	0	0.315	0	0.292	0.292	0.267	0.269	0.195	0.19	0.117	0.114	0.051	0.049
350.204	0.302	0	0.32	0	0.293	0.292	0.268	0.269	0.193	0.19	0.119	0.114	0.054	0.049
350.404	0.307	0	0.321	0	0.292	0.291	0.278	0.269	0.198	0.19	0.123	0.114	0.06	0.049
350.604	0.305	0	0.318	0	0.296	0.291	0.269	0.269	0.193	0.19	0.117	0.114	0.047	0.049
350.804	0.303	0	0.31	0	0.292	0.291	0.268	0.269	0.193	0.19	0.12	0.114	0.053	0.049
351.004	0.301	0	0.315	0	0.292	0.291	0.27	0.269	0.19	0.19	0.115	0.114	0.051	0.049
351.204	0.306	0	0.309	0	0.295	0.291	0.272	0.269	0.188	0.19	0.12	0.114	0.05	0.049
351.404	0.307	0	0.309	0	0.296	0.291	0.272	0.269	0.188	0.19	0.113	0.114	0.048	0.049
351.604	0.298	0	0.306	0	0.285	0.291	0.261	0.269	0.182	0.19	0.114	0.114	0.041	0.049
351.804	0.306	0	0.319	0	0.292	0.291	0.27	0.269	0.191	0.19	0.115	0.114	0.055	0.049
352.004	0.31	0	0.313	0	0.293	0.291	0.271	0.269	0.192	0.19	0.118	0.114	0.055	0.049
352.204	0.306	0	0.312	0	0.292	0.291	0.27	0.269	0.187	0.19	0.117	0.114	0.055	0.049
352.404	0.312	0	0.314	0	0.298	0.291	0.271	0.269	0.192	0.19	0.118	0.114	0.055	0.049
352.604	0.297	0	0.305	0	0.285	0.291	0.268	0.269	0.183	0.19	0.113	0.114	0.043	0.049
352.804	0.294	0	0.305	0	0.284	0.291	0.26	0.269	0.183	0.19	0.113	0.114	0.044	0.049
353.004	0.307	0	0.316	0	0.291	0.291	0.275	0.269	0.191	0.19	0.12	0.114	0.055	0.049
353.204	0.303	0	0.313	0	0.288	0.291	0.271	0.269	0.19	0.19	0.115	0.114	0.047	0.049
353.404	0.298	0	0.306	0	0.287	0.291	0.267	0.269	0.184	0.19	0.109	0.114	0.044	0.049
353.604	0.302	0	0.312	0	0.293	0.291	0.268	0.269	0.189	0.19	0.114	0.114	0.049	0.049
353.804	0.304	0	0.309	0	0.295	0.291	0.27	0.269	0.192	0.19	0.114	0.114	0.05	0.049
354.004	0.302	0	0.309	0	0.292	0.291	0.264	0.268	0.193	0.19	0.114	0.114	0.048	0.049
354.204	0.307	0	0.312	0	0.293	0.291	0.269	0.268	0.191	0.19	0.122	0.114	0.054	0.049
354.404	0.303	0	0.312	0	0.287	0.291	0.272	0.268	0.19	0.19	0.116	0.114	0.048	0.049
354.604	0.301	0	0.312	0	0.291	0.291	0.272	0.268	0.195	0.19	0.116	0.114	0.05	0.049
354.804	0.308	0	0.306	0	0.292	0.291	0.272	0.268	0.191	0.19	0.119	0.114	0.051	0.049
355.004	0.302	0	0.309	0	0.291	0.291	0.265	0.268	0.187	0.19	0.112	0.114	0.048	0.049
355.204	0.302	0	0.316	0	0.293	0.291	0.263	0.268	0.192	0.19	0.117	0.114	0.051	0.049
355.404	0.308	0	0.311	0	0.289	0.291	0.267	0.268	0.19	0.19	0.114	0.114	0.05	0.049
355.604	0.308	0	0.315	0	0.289	0.291	0.268	0.268	0.184	0.19	0.12	0.114	0.054	0.049
355.804	0.304	0	0.31	0	0.294	0.291	0.264	0.268	0.188	0.19	0.118	0.114	0.048	0.049
356.004	0.307	0	0.314	0	0.296	0.291	0.269	0.268	0.189	0.19	0.117	0.114	0.052	0.049
356.204	0.302	0	0.309	0	0.294	0.291	0.268	0.268	0.184	0.19	0.113	0.114	0.046	0.049
356.404	0.304	0	0.307	0	0.284	0.291	0.267	0.268	0.186	0.19	0.111	0.114	0.044	0.049
356.604	0.303	0	0.308	0	0.292	0.291	0.262	0.268	0.186	0.19	0.115	0.114	0.042	0.049
356.804	0.297	0	0.315	0	0.295	0.291	0.268	0.268	0.185	0.19	0.117	0.114	0.05	0.049
357.004	0.303	0	0.31	0	0.288	0.291	0.267	0.268	0.191	0.19	0.111	0.114	0.049	0.049
357.204	0.304	0	0.312	0	0.291	0.291	0.265	0.268	0.196	0.19	0.117	0.114	0.046	0.049
357.404	0.299	0	0.308	0	0.293	0.291	0.268	0.268	0.185	0.19	0.119	0.114	0.047	0.049
357.604	0.305	0	0.312	0	0.296	0.291	0.273	0.268	0.193	0.19	0.123	0.114	0.054	0.049
357.804	0.302	0	0.314	0	0.287	0.291	0.264	0.268	0.188	0.19	0.116	0.114	0.049	0.049
358.004	0.306	0	0.315	0	0.291	0.291	0.27	0.268	0.19	0.19	0.114	0.114	0.051	0.049
358.204	0.302	0	0.312	0	0.292	0.291	0.269	0.268	0.184	0.19	0.114	0.114	0.049	0.049
358.404	0.302	0	0.31	0	0.288	0.291	0.262	0.268	0.187	0.19	0.111	0.114	0.046	0.049
358.604	0.303	0	0.31	0	0.291	0.291	0.265	0.268	0.184	0.19	0.116	0.114	0.048	0.049
358.804	0.306	0	0.307	0	0.29	0.291	0.267	0.268	0.188	0.19	0.115	0.114	0.052	0.049
359.004	0.304	0	0.308	0	0.289	0.291	0.26	0.268	0.185	0.19	0.119	0.114	0.046	0.049
359.204	0.302	0	0.309	0	0.286	0.291	0.263	0.268	0.187	0.19	0.119	0.114	0.045	0.049
359.404	0.307	0	0.311	0	0.293	0.291	0.266	0.268	0.19	0.19	0.118	0.114	0.051	0.049
359.604	0.3	0	0.302	0	0.291	0.291	0.267	0.268	0.184	0.19	0.113	0.114	0.045	0.049
359.804	0.302	0	0.309	0	0.289	0.291	0.266	0.268	0.187	0.19	0.111	0.114	0.05	0.049
360.004	0.305	0	0.31	0	0.292	0.291	0.268	0.268	0.188	0.19	0.112	0.114	0.046	0.049
360.204	0.304	0	0.312	0	0.293	0.291	0.268	0.268	0.192	0.19	0.114	0.114	0.052	0.049
360.404	0.301	0	0.309	0	0.292	0.291	0.264	0.268	0.189	0.19	0.109	0.114	0.05	0.049
360.604	0.3	0	0.312	0	0.289	0.291	0.268	0.268	0.185	0.19	0.112	0.114	0.048	0.049
360.804	0.301	0	0.306	0	0.286	0.291	0.268	0.268	0.191	0.19	0.109	0.114	0.048	0.049
361.004	0.306	0	0.312	0	0.292	0.291	0.266	0.268	0.192	0.19	0.119	0.114	0.053	0.049
361.204	0.303	0	0.314	0	0.292	0.291	0.27	0.268	0.191	0.19	0.121	0.114	0.051	0.049
361.404	0.306	0	0.313	0	0.295	0.291	0.268	0.268	0.188	0.19	0.12	0.114	0.051	0.049
361.604	0.303	0	0.305	0	0.29	0.291	0.274	0.268	0.188	0.19	0.118	0.114	0.05	0.049
361.804	0.309	0	0.318	0	0.294	0.29	0.274	0.268	0.193	0.19	0.12	0.114	0.059	0.049
362.004	0.298	0	0.308	0	0.289	0.29	0.264	0.268	0.188	0.19	0.113	0.114	0.046	0.049
362.204	0.296	0	0.304	0	0.287	0.29	0.264	0.268	0.183	0.19	0.111	0.114	0.048	0.049
362.404	0.303	0	0.315	0	0.29	0.29	0.272	0.268	0.19	0.189	0.113	0.114	0.048	0.049
362.604	0.31	0	0.314	0	0.292	0.29	0.268	0.268	0.194	0.189	0.119	0.114	0.051	0.049
362.804	0.302	0	0.306	0	0.287	0.29	0.262	0.268	0.185	0.189	0.111	0.114	0.045	0.049
363.004	0.302	0	0.306	0	0.286	0.29	0.264	0.268	0.187	0.189	0.113	0.114	0.052	0.049
363.204	0.3	0	0.308	0	0.287	0.29	0.267	0.268	0.186	0.189	0.114	0.114	0.049	0.049
363.404	0.3	0	0.307	0	0.289	0.29	0.271	0.268	0.188	0.189	0.114	0.114	0.044	0.049
363.604	0.303	0	0.317	0	0.29	0.29	0.266	0.268	0.187	0.189	0.123	0.114	0.045	0.049
363.804	0.304	0	0.31	0	0.29	0.29	0.269	0.268	0.187	0.189	0.112	0.114	0.048	0.049
364.004	0.306	0	0.306	0	0.295	0.29	0.271	0.268	0.192	0.189	0.114	0.114	0.05	0.049
364.204	0.308	0	0.316	0	0.294	0.29	0.275	0.268	0.195	0.189	0.119	0.114	0.052	0.049
364.404	0.301	0	0.311	0	0.293	0.29	0.272	0.268	0.187	0.189	0.115	0.114	0.05	0.049
364.604	0.305	0	0.307	0	0.292	0.29	0.267	0.268	0.188	0.189	0.113	0.114	0.046	0.049
364.804	0.305	0	0.308	0	0.292	0.29	0.27	0.268	0.189	0.189	0.116	0.114	0.05	0.049
365.004	0.311	0	0.314	0	0.291	0.29	0.272	0.268	0.193	0.189	0.116	0.114	0.048	0.049
365.204	0.302	0	0.314	0	0.29	0.29	0.265	0.268	0.191	0.189	0.117	0.114	0.051	0.049
365.404	0.3	0	0.311	0	0.286	0.29	0.261	0.268	0.185	0.189	0.114	0.114	0.05	0.049
365.604	0.301	0	0.312	0	0.283	0.29	0.265	0.268	0.186	0.189	0.111	0.114	0.047	0.049
365.804	0.304	0	0.312	0	0.288	0.29	0.269	0.268	0.191	0.189	0.111	0.114	0.051	0.049
366.004	0.301	0	0.309	0	0.293	0.29	0.27	0.268	0.188	0.189	0.112	0.114	0.048	0.049
366.204	0.303	0	0.311	0	0.293	0.29	0.267	0.268	0.19	0.189	0.116	0.114	0.052	0.049
366.404	0.298	0	0.313	0	0.288	0.29	0.265	0.267	0.189	0.189	0.114	0.114	0.047	0.049
366.604	0.3	0	0.303	0	0.286	0.29	0.272	0.267	0.186	0.189	0.107	0.114	0.047	0.049
366.804	0.307	0	0.312	0	0.292	0.29	0.273	0.267	0.192	0.189	0.122	0.114	0.056	0.049
367.004	0.308	0	0.31	0	0.292	0.29	0.263	0.267	0.186	0.189	0.117	0.114	0.049	0.049
367.204	0.309	0	0.308	0	0.29	0.29	0.268	0.267	0.189	0.189	0.119	0.114	0.048	0.049
367.404	0.302	0	0.309	0	0.29	0.29	0.27	0.267	0.189	0.189	0.111	0.114	0.048	0.049
367.604	0.304	0	0.311	0	0.285	0.29	0.268	0.267	0.187	0.189	0.117	0.114	0.045	0.049
367.804	0.301	0	0.311	0	0.289	0.29	0.269	0.267	0.189	0.189	0.113	0.114	0.052	0.049
368.004	0.302	0	0.313	0	0.297	0.29	0.274	0.267	0.194	0.189	0.122	0.114	0.054	0.049
368.204	0.308	0	0.315	0	0.295	0.29	0.273	0.267	0.192	0.189	0.117	0.114	0.055	0.049
368.404	0.301	0	0.312	0	0.293	0.29	0.268	0.267	0.196	0.189	0.12	0.113	0.053	0.049
368.604	0.311	0	0.31	0	0.296	0.29	0.268	0.267	0.194	0.189	0.119	0.113	0.049	0.049
368.804	0.304	0	0.309	0	0.288	0.29	0.266	0.267	0.19	0.189	0.114	0.113	0.052	0.049
369.004	0.305	0	0.316	0	0.298	0.29	0.275	0.267	0.19	0.189	0.125	0.113	0.058	0.049
369.204	0.308	0	0.31	0	0.288	0.29	0.273	0.267	0.188	0.189	0.118	0.113	0.048	0.049
369.404	0.308	0	0.312	0	0.291	0.29	0.272	0.267	0.191	0.189	0.121	0.113	0.054	0.049
369.604	0.302	0	0.31	0	0.294	0.29	0.265	0.267	0.192	0.189	0.116	0.113	0.051	0.049
369.804	0.303	0	0.315	0	0.292	0.29	0.268	0.267	0.197	0.189	0.115	0.113	0.054	0.049
370.004	0.304	0	0.31	0	0.288	0.29	0.269	0.267	0.191	0.189	0.114	0.113	0.052	0.049
370.204	0.304	0	0.311	0	0.29	0.29	0.269	0.267	0.186	0.189	0.111	0.113	0.052	0.049
370.404	0.296	0	0.303	0	0.286	0.29	0.269	0.267	0.188	0.189	0.113	0.113	0.048	0.049
370.604	0.303	0	0.31	0	0.289	0.29	0.271	0.267	0.187	0.189	0.115	0.113	0.051	0.049
370.804	0.304	0	0.311	0	0.29	0.29	0.265	0.267	0.188	0.189	0.116	0.113	0.05	0.049
371.004	0.304	0	0.316	0	0.29	0.29	0.273	0.267	0.185	0.189	0.117	0.113	0.051	0.049
371.204	0.303	0	0.314	0	0.287	0.29	0.271	0.267	0.187	0.189	0.113	0.113	0.05	0.049
371.404	0.304	0	0.308	0	0.291	0.29	0.267	0.267	0.189	0.189	0.117	0.113	0.051	0.049
371.604	0.295	0	0.309	0	0.291	0.29	0.265	0.267	0.187	0.189	0.116	0.113	0.05	0.049
371.804	0.301	0	0.312	0	0.295	0.29	0.269	0.267	0.187	0.189	0.118	0.113	0.053	0.049
372.004	0.301	0	0.316	0	0.288	0.29	0.265	0.267	0.188	0.189	0.115	0.113	0.047	0.049
372.204	0.297	0	0.308	0	0.287	0.29	0.264	0.267	0.187	0.189	0.112	0.113	0.048	0.049
372.404	0.3	0	0.307	0	0.292	0.29	0.268	0.267	0.19	0.189	0.115	0.113	0.046	0.049
372.604	0.303	0	0.308	0	0.285	0.29	0.261	0.267	0.187	0.189	0.112	0.113	0.047	0.049
372.804	0.3	0	0.311	0	0.289	0.29	0.27	0.267	0.191	0.189	0.117	0.113	0.055	0.049
373.004	0.303	0	0.31	0	0.288	0.29	0.27	0.267	0.193	0.189	0.113	0.113	0.047	0.049
373.204	0.302	0	0.315	0	0.29	0.289	0.27	0.267	0.191	0.189	0.114	0.113	0.052	0.049
373.404	0.304	0	0.314	0	0.288	0.289	0.266	0.267	0.185	0.189	0.116	0.113	0.051	0.049
373.604	0.3	0	0.311	0	0.285	0.289	0.264	0.267	0.188	0.189	0.116	0.113	0.048	0.049
373.804	0.305	0	0.312	0	0.285	0.289	0.265	0.267	0.184	0.189	0.116	0.113	0.046	0.049
374.004	0.304	0	0.313	0	0.288	0.289	0.267	0.267	0.194	0.189	0.119	0.113	0.054	0.049
374.204	0.298	0	0.301	0	0.279	0.289	0.266	0.267	0.186	0.189	0.113	0.113	0.045	0.049
374.404	0.305	0	0.305	0	0.287	0.289	0.271	0.267	0.188	0.189	0.112	0.113	0.048	0.049
374.604	0.301	0	0.308	0	0.294	0.289	0.266	0.267	0.186	0.189	0.115	0.113	0.055	0.049
374.804	0.301	0	0.307	0	0.287	0.289	0.266	0.267	0.187	0.189	0.114	0.113	0.048	0.049
375.004	0.307	0	0.309	0	0.294	0.289	0.27	0.267	0.186	0.189	0.117	0.113	0.05	0.049
375.204	0.302	0	0.313	0	0.288	0.289	0.267	0.267	0.193	0.189	0.118	0.113	0.052	0.049
375.404	0.297	0	0.307	0	0.288	0.289	0.265	0.267	0.187	0.189	0.11	0.113	0.043	0.049
375.604	0.298	0	0.308	0	0.291	0.289	0.265	0.267	0.191	0.189	0.118	0.113	0.042	0.049
375.804	0.304	0	0.309	0	0.288	0.289	0.268	0.267	0.192	0.189	0.117	0.113	0.05	0.049
376.004	0.302	0	0.313	0	0.293	0.289	0.265	0.267	0.192	0.189	0.116	0.113	0.054	0.049
376.204	0.299	0	0.307	0	0.285	0.289	0.266	0.267	0.187	0.189	0.114	0.113	0.047	0.049
376.404	0.3	0	0.313	0	0.288	0.289	0.264	0.267	0.187	0.189	0.114	0.113	0.049	0.049
376.604	0.303	0	0.314	0	0.29	0.289	0.271	0.267	0.192	0.189	0.119	0.113	0.05	0.049
376.804	0.296	0	0.308	0	0.287	0.289	0.269	0.267	0.186	0.189	0.11	0.113	0.046	0.048
377.004	0.298	0	0.31	0	0.284	0.289	0.27	0.267	0.188	0.189	0.114	0.113	0.048	0.048
377.204	0.305	0	0.309	0	0.286	0.289	0.265	0.267	0.189	0.189	0.112	0.113	0.047	0.048
377.404	0.306	0	0.314	0	0.293	0.289	0.269	0.267	0.192	0.189	0.121	0.113	0.054	0.048
377.604	0.296	0	0.307	0	0.287	0.289	0.26	0.267	0.182	0.189	0.111	0.113	0.045	0.048
377.804	0.299	0	0.309	0	0.286	0.289	0.267	0.267	0.187	0.189	0.119	0.113	0.05	0.048
378.004	0.295	0	0.308	0	0.287	0.289	0.26	0.267	0.186	0.189	0.109	0.113	0.048	0.048
378.204	0.295	0	0.31	0	0.284	0.289	0.27	0.267	0.187	0.189	0.116	0.113	0.049	0.048
378.404	0.297	0	0.305	0	0.29	0.289	0.266	0.267	0.19	0.189	0.115	0.113	0.051	0.048
378.604	0.303	0	0.318	0	0.288	0.289	0.271	0.267	0.192	0.189	0.119	0.113	0.054	0.048
378.804	0.301	0	0.315	0	0.289	0.289	0.265	0.266	0.187	0.189	0.111	0.113	0.051	0.048
379.004	0.301	0	0.31	0	0.289	0.289	0.267	0.266	0.195	0.189	0.113	0.113	0.057	0.048
379.204	0.299	0	0.312	0	0.295	0.289	0.266	0.266	0.191	0.189	0.117	0.113	0.051	0.048
379.404	0.305	0	0.314	0	0.288	0.289	0.27	0.266	0.191	0.189	0.115	0.113	0.05	0.048
379.604	0.303	0	0.307	0	0.287	0.289	0.269	0.266	0.187	0.189	0.11	0.113	0.048	0.048
379.804	0.304	0	0.313	0	0.294	0.289	0.269	0.266	0.192	0.189	0.117	0.113	0.055	0.048
380.004	0.301	0	0.307	0	0.288	0.289	0.268	0.266	0.187	0.189	0.115	0.113	0.046	0.048
380.204	0.307	0	0.313	0	0.293	0.289	0.268	0.266	0.191	0.188	0.121	0.113	0.056	0.048
380.404	0.301	0	0.31	0	0.287	0.289	0.266	0.266	0.185	0.188	0.112	0.113	0.05	0.048
380.604	0.3	0	0.306	0	0.287	0.289	0.268	0.266	0.187	0.188	0.116	0.113	0.048	0.048
380.804	0.296	0	0.305	0	0.281	0.289	0.263	0.266	0.188	0.188	0.108	0.113	0.049	0.048
381.004	0.301	0	0.312	0	0.295	0.289	0.266	0.266	0.19	0.188	0.121	0.113	0.053	0.048
381.204	0.299	0	0.305	0	0.29	0.289	0.265	0.266	0.183	0.188	0.114	0.113	0.05	0.048
381.404	0.304	0	0.311	0	0.289	0.289	0.271	0.266	0.191	0.188	0.119	0.113	0.054	0.048
381.604	0.301	0	0.303	0	0.287	0.289	0.268	0.266	0.188	0.188	0.112	0.113	0.051	0.048
381.804	0.299	0	0.307	0	0.284	0.289	0.263	0.266	0.188	0.188	0.113	0.113	0.043	0.048
382.004	0.3	0	0.308	0	0.29	0.289	0.264	0.266	0.191	0.188	0.115	0.113	0.046	0.048
382.204	0.3	0	0.303	0	0.289	0.289	0.264	0.266	0.191	0.188	0.109	0.113	0.05	0.048
382.404	0.3	0	0.312	0	0.291	0.289	0.269	0.266	0.187	0.188	0.116	0.113	0.05	0.048
382.604	0.295	0	0.301	0	0.283	0.289	0.266	0.266	0.183	0.188	0.111	0.113	0.046	0.048
382.804	0.298	0	0.307	0	0.288	0.289	0.27	0.266	0.189	0.188	0.116	0.113	0.048	0.048
383.004	0.295	0	0.306	0	0.29	0.289	0.264	0.266	0.184	0.188	0.112	0.113	0.046	0.048
383.204	0.297	0	0.303	0	0.285	0.289	0.265	0.266	0.181	0.188	0.117	0.113	0.052	0.048
383.404	0.291	0	0.306	0	0.282	0.289	0.265	0.266	0.188	0.188	0.113	0.113	0.047	0.048
383.604	0.296	0	0.306	0	0.286	0.289	0.264	0.266	0.181	0.188	0.113	0.113	0.05	0.048
383.804	0.302	0	0.307	0	0.284	0.289	0.264	0.266	0.185	0.188	0.111	0.113	0.048	0.048
384.004	0.303	0	0.305	0	0.288	0.289	0.267	0.266	0.186	0.188	0.115	0.113	0.052	0.048
384.204	0.301	0	0.305	0	0.292	0.289	0.269	0.266	0.186	0.188	0.117	0.113	0.053	0.048
384.404	0.297	0	0.305	0	0.284	0.289	0.264	0.266	0.188	0.188	0.112	0.113	0.049	0.048
384.604	0.297	0	0.309	0	0.286	0.288	0.265	0.266	0.188	0.188	0.118	0.113	0.047	0.048
384.804	0.298	0	0.307	0	0.284	0.288	0.265	0.266	0.186	0.188	0.112	0.113	0.048	0.048
385.004	0.301	0	0.309	0	0.288	0.288	0.267	0.266	0.187	0.188	0.122	0.113	0.048	0.048
385.204	0.301	0	0.306	0	0.289	0.288	0.271	0.266	0.193	0.188	0.114	0.113	0.056	0.048
385.404	0.304	0	0.313	0	0.293	0.288	0.266	0.266	0.19	0.188	0.118	0.113	0.052	0.048
385.604	0.296	0	0.306	0	0.281	0.288	0.265	0.266	0.188	0.188	0.109	0.113	0.05	0.048
385.804	0.303	0	0.311	0	0.286	0.288	0.27	0.266	0.191	0.188	0.117	0.113	0.048	0.048
386.004	0.294	0	0.306	0	0.284	0.288	0.262	0.266	0.188	0.188	0.11	0.113	0.05	0.048
386.204	0.296	0	0.306	0	0.288	0.288	0.264	0.266	0.191	0.188	0.115	0.113	0.052	0.048
386.404	0.296	0	0.307	0	0.284	0.288	0.26	0.266	0.182	0.188	0.112	0.113	0.044	0.048
386.604	0.296	0	0.303	0	0.283	0.288	0.258	0.266	0.186	0.188	0.112	0.113	0.048	0.048
386.804	0.305	0	0.308	0	0.287	0.288	0.267	0.266	0.188	0.188	0.114	0.113	0.05	0.048
387.004	0.297	0	0.307	0	0.285	0.288	0.267	0.266	0.186	0.188	0.117	0.113	0.049	0.048
387.204	0.304	0	0.313	0	0.292	0.288	0.271	0.266	0.19	0.188	0.119	0.113	0.052	0.048
387.404	0.298	0	0.31	0	0.288	0.288	0.265	0.266	0.188	0.188	0.121	0.113	0.054	0.048
387.604	0.297	0	0.302	0	0.28	0.288	0.259	0.266	0.186	0.188	0.112	0.113	0.045	0.048
387.804	0.302	0	0.309	0	0.292	0.288	0.27	0.266	0.19	0.188	0.116	0.113	0.053	0.048
388.004	0.297	0	0.304	0	0.281	0.288	0.267	0.266	0.189	0.188	0.118	0.113	0.05	0.048
388.204	0.297	0	0.308	0	0.287	0.288	0.264	0.266	0.187	0.188	0.112	0.113	0.049	0.048
388.404	0.302	0	0.304	0	0.289	0.288	0.263	0.266	0.191	0.188	0.117	0.113	0.053	0.048
388.604	0.296	0	0.308	0	0.287	0.288	0.265	0.266	0.188	0.188	0.11	0.113	0.047	0.048
388.804	0.294	0	0.304	0	0.286	0.288	0.267	0.266	0.188	0.188	0.114	0.113	0.045	0.048
389.004	0.302	0	0.311	0	0.294	0.288	0.272	0.266	0.19	0.188	0.119	0.113	0.047	0.048
389.204	0.292	0	0.305	0	0.289	0.288	0.266	0.266	0.187	0.188	0.11	0.113	0.047	0.048
389.404	0.294	0	0.305	0	0.284	0.288	0.259	0.266	0.186	0.188	0.107	0.113	0.045	0.048
389.604	0.3	0	0.308	0	0.287	0.288	0.268	0.266	0.184	0.188	0.114	0.113	0.05	0.048
389.804	0.299	0	0.307	0	0.29	0.288	0.269	0.266	0.189	0.188	0.118	0.113	0.051	0.048
390.004	0.301	0	0.308	0	0.29	0.288	0.263	0.266	0.189	0.188	0.114	0.113	0.05	0.048
390.204	0.294	0	0.312	0	0.291	0.288	0.266	0.266	0.187	0.188	0.116	0.113	0.053	0.048
390.404	0.29	0	0.303	0	0.282	0.288	0.261	0.266	0.18	0.188	0.109	0.113	0.045	0.048
390.604	0.294	0	0.301	0	0.281	0.288	0.261	0.266	0.181	0.188	0.112	0.113	0.046	0.048
390.804	0.3	0	0.308	0	0.289	0.288	0.272	0.266	0.186	0.188	0.112	0.113	0.048	0.048
391.004	0.298	0	0.311	0	0.287	0.288	0.266	0.266	0.185	0.188	0.115	0.113	0.05	0.048
391.204	0.3	0	0.306	0	0.285	0.288	0.266	0.265	0.186	0.188	0.116	0.113	0.048	0.048
391.404	0.301	0	0.309	0	0.285	0.288	0.263	0.265	0.191	0.188	0.119	0.113	0.053	0.048
391.604	0.301	0	0.309	0	0.287	0.288	0.267	0.265	0.191	0.188	0.115	0.113	0.05	0.048
391.804	0.299	0	0.309	0	0.286	0.288	0.266	0.265	0.19	0.188	0.115	0.113	0.046	0.048
392.004	0.303	0	0.31	0	0.289	0.288	0.27	0.265	0.19	0.188	0.117	0.113	0.052	0.048
392.204	0.295	0	0.309	0	0.288	0.288	0.264	0.265	0.186	0.188	0.116	0.113	0.051	0.048
392.404	0.3	0	0.304	0	0.285	0.288	0.267	0.265	0.189	0.188	0.116	0.113	0.049	0.048
392.604	0.298	0	0.307	0	0.289	0.288	0.27	0.265	0.187	0.188	0.118	0.113	0.05	0.048
392.804	0.301	0	0.311	0	0.29	0.288	0.274	0.265	0.19	0.188	0.122	0.113	0.056	0.048
393.004	0.303	0	0.311	0	0.287	0.288	0.268	0.265	0.192	0.188	0.119	0.113	0.053	0.048
393.204	0.298	0	0.307	0	0.288	0.288	0.271	0.265	0.192	0.188	0.114	0.113	0.054	0.048
393.404	0.291	0	0.299	0	0.282	0.288	0.257	0.265	0.183	0.188	0.111	0.113	0.042	0.048
393.604	0.302	0	0.311	0	0.286	0.288	0.265	0.265	0.188	0.188	0.111	0.113	0.05	0.048
393.804	0.299	0	0.304	0	0.286	0.288	0.263	0.265	0.185	0.188	0.113	0.113	0.045	0.048
394.004	0.304	0	0.314	0	0.285	0.288	0.268	0.265	0.188	0.188	0.12	0.113	0.053	0.048
394.204	0.295	0	0.307	0	0.284	0.288	0.264	0.265	0.185	0.188	0.114	0.113	0.049	0.048
394.404	0.293	0	0.304	0	0.287	0.288	0.263	0.265	0.185	0.188	0.116	0.113	0.046	0.048
394.604	0.297	0	0.308	0	0.285	0.288	0.26	0.265	0.188	0.188	0.115	0.113	0.052	0.048
394.804	0.301	0	0.308	0	0.283	0.288	0.265	0.265	0.184	0.188	0.114	0.113	0.047	0.048
395.004	0.296	0	0.307	0	0.287	0.288	0.267	0.265	0.187	0.188	0.119	0.113	0.051	0.048
395.204	0.294	0	0.301	0	0.282	0.288	0.26	0.265	0.187	0.188	0.116	0.113	0.047	0.048
395.404	0.297	0	0.303	0	0.283	0.288	0.263	0.265	0.188	0.188	0.112	0.113	0.049	0.048
395.604	0.296	0	0.304	0	0.286	0.288	0.263	0.265	0.191	0.188	0.116	0.113	0.049	0.048
395.804	0.297	0	0.304	0	0.286	0.288	0.258	0.265	0.18	0.188	0.112	0.113	0.048	0.048
396.004	0.293	0	0.304	0	0.284	0.288	0.262	0.265	0.181	0.188	0.115	0.113	0.045	0.048
396.204	0.292	0	0.297	0	0.28	0.287	0.259	0.265	0.179	0.188	0.108	0.113	0.042	0.048
396.404	0.299	0	0.308	0	0.287	0.287	0.262	0.265	0.189	0.188	0.113	0.113	0.047	0.048
396.604	0.291	0	0.299	0	0.282	0.287	0.257	0.265	0.184	0.188	0.111	0.113	0.044	0.048
396.804	0.302	0	0.307	0	0.291	0.287	0.265	0.265	0.193	0.188	0.112	0.113	0.046	0.048
397.004	0.294	0	0.304	0	0.284	0.287	0.261	0.265	0.188	0.188	0.11	0.113	0.05	0.048
397.204	0.294	0	0.307	0	0.285	0.287	0.268	0.265	0.184	0.188	0.115	0.113	0.046	0.048
397.404	0.293	0	0.299	0	0.285	0.287	0.261	0.265	0.183	0.188	0.115	0.113	0.049	0.048
397.604	0.291	0	0.303	0	0.284	0.287	0.264	0.265	0.189	0.188	0.116	0.113	0.046	0.048
397.804	0.294	0	0.305	0	0.287	0.287	0.262	0.265	0.185	0.188	0.112	0.113	0.046	0.048
398.004	0.296	0	0.311	0	0.291	0.287	0.268	0.265	0.194	0.187	0.115	0.112	0.054	0.048
398.204	0.294	0	0.31	0	0.283	0.287	0.261	0.265	0.185	0.187	0.115	0.112	0.05	0.048
398.404	0.289	0	0.297	0	0.279	0.287	0.265	0.265	0.179	0.187	0.111	0.112	0.042	0.048
398.604	0.292	0	0.303	0	0.288	0.287	0.271	0.265	0.185	0.187	0.116	0.112	0.049	0.048
398.804	0.296	0	0.305	0	0.282	0.287	0.266	0.265	0.183	0.187	0.111	0.112	0.044	0.048
399.004	0.298	0	0.305	0	0.285	0.287	0.266	0.265	0.181	0.187	0.109	0.112	0.045	0.048
399.204	0.299	0	0.308	0	0.289	0.287	0.267	0.265	0.192	0.187	0.119	0.112	0.05	0.048
[truncated: 403 more rows]

## Sheet: Fig. 4D Right
Apa-20S CP (a E244A,D252A,E255A,D257A) BLI curves
	1000 nM		500 nM		250 nM		125 nM		62,5 nM		31,25 nM		15,63 nM
Adjusted time	Raw	fit	Raw	fit	Raw	fit	Raw	fit	Raw	fit	Raw	fit	Raw	fit
0	-0.0016678	0	-0.00233359	0	-0.00274217	0	-0.0035238	0	-0.0028617	0	-0.00130005	0	-0.000850288	0
0.2	0.0358374	0.0317817	0.0191316	0.0116445	0.0109963	0.00556493	0.00404899	0.00325871	0.00572947	0.00144167	0.00165629	0.00093986	0.000345899	0.000485549
0.4	0.0512923	0.0571537	0.0252021	0.0219535	0.0122465	0.0107535	0.00688737	0.00637404	-0.00369124	0.00283821	-0.00208214	0.00185637	-0.00936203	0.000960483
0.6	0.0751249	0.077425	0.0408154	0.031083	0.024329	0.015592	0.0136542	0.00935247	0.00543667	0.00419108	0.00399222	0.00275014	0.000769266	0.00142505
0.8	0.0844531	0.093637	0.0488424	0.039171	0.0295762	0.0201047	0.0196634	0.0122002	0.00874526	0.00550172	0.00586924	0.00362176	-0.00144999	0.00187949
1	0.0911844	0.106619	0.0586188	0.046339	0.0406048	0.0243143	0.0240288	0.014923	0.0107522	0.00677149	0.0110379	0.00447183	0.00122512	0.00232403
1.2	0.0979068	0.117029	0.0568297	0.0526946	0.0405058	0.0282419	0.0221904	0.0175267	0.00897529	0.00800173	0.00590086	0.0053009	-0.00165435	0.0027589
1.4	0.106999	0.125393	0.0655078	0.0583326	0.0470373	0.0319072	0.0276754	0.0200166	0.0122787	0.00919372	0.0103306	0.00610953	0.00216769	0.00318433
1.6	0.116201	0.132129	0.074022	0.0633369	0.0557863	0.0353285	0.0369127	0.0223977	0.023172	0.0103487	0.0184725	0.00689825	0.0051081	0.00360054
1.8	0.112467	0.137568	0.0726498	0.0677815	0.0564896	0.0385226	0.0336025	0.0246751	0.0161568	0.0114679	0.0128363	0.00766759	0.00571526	0.00400773
2	0.116005	0.141975	0.0744559	0.0717317	0.0534065	0.0415054	0.034203	0.0268534	0.0135998	0.0125525	0.0116153	0.00841805	-0.00403908	0.00440611
2.2	0.123904	0.14556	0.0731444	0.0752452	0.0561789	0.0442917	0.0388281	0.028937	0.0197032	0.0136036	0.0133674	0.00915013	0.00502181	0.0047959
2.4	0.123478	0.148491	0.0838326	0.078373	0.057114	0.046895	0.0377953	0.0309302	0.0178397	0.0146223	0.00882501	0.00986431	0.00327271	0.00517728
2.6	0.123605	0.150901	0.0770626	0.0811602	0.0516474	0.0493281	0.0346517	0.0328372	0.0136579	0.0156096	0.0105896	0.0105611	0.00116055	0.00555046
2.8	0.128849	0.152895	0.0820371	0.0836464	0.0626928	0.0516029	0.0450942	0.0346618	0.0203668	0.0165666	0.0128631	0.0112409	0.00520674	0.00591561
3	0.131109	0.154559	0.0862714	0.0858667	0.0687961	0.0537304	0.0488864	0.0364076	0.025256	0.0174942	0.0215223	0.0119041	0.00586285	0.00627293
3.2	0.13401	0.155959	0.0862873	0.0878522	0.0657547	0.0557208	0.0524684	0.0380784	0.0253686	0.0183935	0.0187804	0.0125513	0.00215348	0.00662259
3.4	0.127909	0.157148	0.0831193	0.0896303	0.0634635	0.0575836	0.0422331	0.0396774	0.0187332	0.0192652	0.00861859	0.0131828	0.00191402	0.00696478
3.6	0.132285	0.15817	0.0906424	0.091225	0.0713787	0.0593277	0.0483818	0.0412078	0.0256175	0.0201105	0.0161595	0.013799	0.00713039	0.00729966
3.8	0.133822	0.159058	0.0907077	0.0926578	0.0689891	0.0609614	0.0478535	0.0426728	0.0247358	0.02093	0.0165274	0.0144004	0.00441703	0.00762741
4	0.139463	0.159838	0.0932105	0.0939474	0.0773478	0.0624923	0.0495819	0.0440754	0.0267221	0.0217246	0.0247403	0.0149873	0.00679421	0.00794818
4.2	0.141335	0.160533	0.0941135	0.0951107	0.0760922	0.0639276	0.0561942	0.0454183	0.0276378	0.0224952	0.0283601	0.0155601	0.00538235	0.00826215
4.4	0.141103	0.161159	0.0917213	0.0961621	0.0766112	0.0652739	0.0581729	0.0467042	0.0320033	0.0232425	0.0215381	0.0161192	0.0116747	0.00856946
4.6	0.137427	0.161731	0.0909147	0.0971148	0.0674235	0.0665374	0.0457476	0.0479357	0.0272409	0.0239673	0.0171079	0.016665	0.00163146	0.00887026
4.8	0.135178	0.162258	0.0893604	0.0979801	0.0741248	0.0677238	0.0519601	0.0491152	0.0268081	0.0246704	0.0176728	0.0171977	0.00431387	0.00916472
5	0.140142	0.162749	0.0930161	0.0987683	0.07827	0.0688385	0.0535117	0.0502451	0.028775	0.0253523	0.0257393	0.0177178	0.00354344	0.00945298
5.2	0.147446	0.163211	0.0933797	0.0994882	0.0759109	0.0698865	0.0564161	0.0513277	0.030906	0.0260138	0.0217712	0.0182255	0.010122	0.00973517
5.4	0.156845	0.16365	0.104572	0.100148	0.0874775	0.0708723	0.0631221	0.052365	0.0364513	0.0266557	0.0362178	0.0187212	0.0147953	0.0100114
5.6	0.145706	0.16407	0.0968871	0.100754	0.0758694	0.0718004	0.055389	0.053359	0.0337062	0.0272784	0.0256714	0.0192052	0.00828409	0.0102819
5.8	0.152716	0.164475	0.102556	0.101313	0.0825867	0.0726746	0.0595129	0.0543119	0.0316338	0.0278827	0.0268612	0.0196779	0.00768634	0.0105468
6	0.152042	0.164866	0.0974707	0.10183	0.0841747	0.0734988	0.0645836	0.0552253	0.0338412	0.0284691	0.0316137	0.0201394	0.0149066	0.0108061
6.2	0.142555	0.165247	0.0914147	0.10231	0.069309	0.0742764	0.0501262	0.056101	0.0257487	0.0290382	0.0156128	0.0205901	-0.00300428	0.01106
6.4	0.15311	0.165619	0.0999592	0.102758	0.0786599	0.0750105	0.061646	0.0569409	0.0354308	0.0295906	0.0263232	0.0210303	0.0108453	0.0113087
6.6	0.152835	0.165984	0.100039	0.103176	0.0825393	0.0757043	0.0584778	0.0577464	0.0358943	0.0301268	0.0311169	0.0214603	0.011542	0.0115522
6.8	0.148683	0.166342	0.0912193	0.103569	0.0770768	0.0763605	0.0514218	0.0585191	0.0304949	0.0306474	0.0229491	0.0218803	0.00357724	0.0117906
7	0.155929	0.166694	0.101008	0.103939	0.0822988	0.0769818	0.0602982	0.0592605	0.035616	0.0311528	0.0243802	0.0222906	0.012737	0.0120242
7.2	0.152893	0.167042	0.10112	0.104289	0.0751379	0.0775704	0.0643533	0.0599721	0.0308865	0.0316436	0.0234684	0.0226914	0.0124673	0.0122529
7.4	0.155871	0.167386	0.105794	0.10462	0.0841281	0.0781287	0.0648785	0.0606551	0.0361385	0.0321202	0.0257091	0.023083	0.0155303	0.012477
7.6	0.156459	0.167725	0.107583	0.104936	0.0845263	0.0786587	0.0616221	0.0613108	0.0362798	0.0325831	0.0315089	0.0234656	0.0125414	0.0126965
7.8	0.155687	0.168062	0.0991661	0.105238	0.0807642	0.0791625	0.0596422	0.0619404	0.0339834	0.0330327	0.023322	0.0238395	0.00853698	0.0129115
8	0.15014	0.168395	0.0960528	0.105528	0.0811776	0.0796418	0.0597968	0.0625452	0.0360377	0.0334695	0.0256387	0.0242049	0.00995289	0.0131221
8.2	0.151483	0.168725	0.10354	0.105806	0.0799807	0.0800983	0.0581428	0.0631263	0.0397278	0.0338938	0.0256819	0.024562	0.00572804	0.0133285
8.4	0.158182	0.169052	0.107397	0.106074	0.0887353	0.0805335	0.0677788	0.0636847	0.0432612	0.0343062	0.0302812	0.024911	0.0136565	0.0135307
8.6	0.15911	0.169377	0.103787	0.106333	0.0806041	0.080949	0.0617067	0.0642214	0.0373884	0.0347069	0.0251459	0.0252522	0.00971591	0.0137288
8.8	0.155928	0.1697	0.10164	0.106585	0.0820193	0.081346	0.0586581	0.0647374	0.0347566	0.0350963	0.0273294	0.0255857	0.00687438	0.0139229
9	0.160136	0.17002	0.111337	0.106829	0.0866365	0.0817259	0.0634905	0.0652336	0.0374885	0.0354749	0.0357321	0.0259117	0.00761391	0.0141132
9.2	0.159741	0.170338	0.102104	0.107067	0.0830622	0.0820898	0.0629696	0.065711	0.0370745	0.035843	0.0257614	0.0262305	0.00828448	0.0142996
9.4	0.156551	0.170654	0.104922	0.1073	0.0803451	0.0824388	0.0615315	0.0661703	0.0320183	0.0362008	0.0271181	0.0265423	0.00647875	0.0144823
9.6	0.161296	0.170967	0.109278	0.107527	0.085756	0.0827739	0.0680191	0.0666124	0.0412165	0.0365488	0.0335164	0.0268471	0.0133983	0.0146614
9.8	0.159519	0.171279	0.108408	0.10775	0.087797	0.083096	0.0624068	0.0670381	0.0435372	0.0368873	0.0338768	0.0271453	0.0114729	0.0148369
10	0.165587	0.171588	0.111611	0.107969	0.0867757	0.0834061	0.065741	0.067448	0.0427156	0.0372165	0.0337806	0.0274369	0.0171625	0.015009
10.2	0.161585	0.171896	0.105073	0.108184	0.0869874	0.083705	0.0646632	0.067843	0.0355683	0.0375368	0.0329923	0.0277222	0.0148859	0.0151777
10.4	0.166139	0.172201	0.109021	0.108396	0.0871767	0.0839934	0.0662044	0.0682236	0.0412796	0.0378484	0.0300343	0.0280013	0.0101685	0.015343
10.6	0.168496	0.172505	0.106882	0.108604	0.0874464	0.084272	0.0695796	0.0685905	0.0383735	0.0381517	0.0307853	0.0282743	0.0136086	0.0155052
10.8	0.160195	0.172806	0.108243	0.10881	0.0898164	0.0845415	0.0640142	0.0689443	0.038359	0.0384469	0.0283967	0.0285415	0.016215	0.0156642
11	0.168918	0.173106	0.115607	0.109014	0.0919057	0.0848025	0.0676047	0.0692857	0.0416255	0.0387342	0.03389	0.0288029	0.0166627	0.0158201
11.2	0.161684	0.173404	0.112056	0.109215	0.0880557	0.0850556	0.0644533	0.0696151	0.0405192	0.039014	0.0309309	0.0290588	0.00695256	0.0159729
11.4	0.15919	0.173699	0.103607	0.109414	0.0818824	0.0853013	0.060251	0.0699331	0.0372994	0.0392865	0.0233367	0.0293093	0.00696128	0.0161229
11.6	0.16195	0.173993	0.10508	0.109611	0.089756	0.0855401	0.0661366	0.0702402	0.0393939	0.0395518	0.0295576	0.0295544	0.0100746	0.0162699
11.8	0.168872	0.174286	0.113783	0.109806	0.0897022	0.0857724	0.0646206	0.0705369	0.0387259	0.0398103	0.033341	0.0297945	0.01198	0.0164142
12	0.167181	0.174576	0.105443	0.11	0.0923102	0.0859987	0.0663605	0.0708236	0.0400548	0.0400622	0.0301858	0.0300295	0.0132702	0.0165557
12.2	0.164438	0.174865	0.11105	0.110192	0.0894167	0.0862194	0.0647699	0.0711009	0.0374486	0.0403076	0.029633	0.0302596	0.0110537	0.0166945
12.4	0.168366	0.175151	0.109266	0.110383	0.0920721	0.0864348	0.0689297	0.0713691	0.0374895	0.0405468	0.0297309	0.030485	0.0112772	0.0168307
12.6	0.173316	0.175436	0.114237	0.110572	0.0959686	0.0866453	0.0730756	0.0716286	0.0454474	0.04078	0.0377198	0.0307057	0.0134848	0.0169644
12.8	0.169294	0.17572	0.111857	0.11076	0.0901687	0.0868512	0.0686838	0.0718798	0.0426173	0.0410073	0.0332044	0.030922	0.0121716	0.0170955
13	0.167151	0.176001	0.109611	0.110947	0.0887689	0.0870529	0.0671022	0.0721232	0.0372591	0.041229	0.0275234	0.0311338	0.0121502	0.0172242
13.2	0.173507	0.176281	0.115467	0.111133	0.0970981	0.0872505	0.081371	0.0723589	0.046392	0.0414453	0.0398865	0.0313414	0.0156402	0.0173505
13.4	0.16825	0.176559	0.111585	0.111318	0.0930326	0.0874444	0.0688167	0.0725874	0.0404061	0.0416563	0.0328586	0.0315448	0.0154537	0.0174744
13.6	0.173912	0.176835	0.11212	0.111502	0.0914251	0.0876347	0.0720774	0.0728091	0.0486349	0.0418621	0.035918	0.0317441	0.0180913	0.0175961
13.8	0.176548	0.177109	0.117664	0.111685	0.0958575	0.0878218	0.0701664	0.0730241	0.0444835	0.0420631	0.0347558	0.0319395	0.015561	0.0177156
14	0.171463	0.177382	0.11152	0.111867	0.0918112	0.0880057	0.0666243	0.0732328	0.0411467	0.0422592	0.03352	0.0321311	0.0161805	0.0178328
14.2	0.175752	0.177653	0.111749	0.112048	0.0944349	0.0881868	0.0678505	0.0734355	0.0431143	0.0424507	0.0357819	0.0323189	0.0184054	0.017948
14.4	0.168948	0.177923	0.113368	0.112228	0.0892453	0.0883652	0.0697238	0.0736325	0.0410215	0.0426378	0.0347293	0.032503	0.0164726	0.018061
14.6	0.170768	0.17819	0.109195	0.112407	0.0954108	0.088541	0.0687002	0.0738239	0.0413393	0.0428205	0.0328041	0.0326836	0.0177617	0.0181721
14.8	0.169325	0.178457	0.111785	0.112586	0.0913293	0.0887144	0.0682641	0.0740101	0.0471488	0.042999	0.0354143	0.0328607	0.0149265	0.0182811
15	0.172208	0.178721	0.118168	0.112764	0.0916162	0.0888856	0.0720435	0.0741912	0.0434697	0.0431734	0.034696	0.0330344	0.0166192	0.0183882
15.2	0.178069	0.178984	0.118735	0.112941	0.0998775	0.0890547	0.0758437	0.0743676	0.0423263	0.0433439	0.0331638	0.0332049	0.0165928	0.0184934
15.4	0.175898	0.179245	0.119883	0.113117	0.0958007	0.0892218	0.069482	0.0745393	0.0451445	0.0435106	0.0386538	0.0333721	0.0152145	0.0185968
15.6	0.171577	0.179504	0.115874	0.113292	0.09334	0.089387	0.0712507	0.0747067	0.0431404	0.0436736	0.0351358	0.0335363	0.0174417	0.0186983
15.8	0.172561	0.179762	0.119163	0.113467	0.0930418	0.0895505	0.0710578	0.0748698	0.0469385	0.043833	0.0346914	0.0336974	0.0183996	0.0187981
16	0.166776	0.180019	0.114352	0.113641	0.0898136	0.0897123	0.0725485	0.075029	0.041627	0.043989	0.0400629	0.0338555	0.0141897	0.0188962
16.2	0.174967	0.180273	0.110625	0.113815	0.0887332	0.0898726	0.0651666	0.0751843	0.0467161	0.0441417	0.0313036	0.0340107	0.0137256	0.0189925
16.4	0.180055	0.180526	0.115754	0.113988	0.0924429	0.0900313	0.0786612	0.0753359	0.0495779	0.0442911	0.0378911	0.0341632	0.0226872	0.0190872
16.6	0.180145	0.180778	0.121997	0.11416	0.0982564	0.0901887	0.0729233	0.075484	0.0461909	0.0444374	0.0339284	0.0343129	0.0170777	0.0191803
16.8	0.177984	0.181028	0.118436	0.114331	0.0939993	0.0903448	0.0766192	0.0756288	0.0472325	0.0445806	0.034876	0.0344599	0.017678	0.0192718
17	0.17509	0.181276	0.119244	0.114502	0.0990537	0.0904996	0.075118	0.0757704	0.0443473	0.0447209	0.0364066	0.0346043	0.0192263	0.0193618
17.2	0.178045	0.181523	0.117172	0.114672	0.0928528	0.0906532	0.0709013	0.0759088	0.0428385	0.0448584	0.0332554	0.0347462	0.0121329	0.0194503
17.4	0.176571	0.181769	0.115905	0.114842	0.09896	0.0908058	0.0696002	0.0760444	0.0456309	0.0449932	0.0330034	0.0348857	0.0188824	0.0195373
17.6	0.177694	0.182013	0.117276	0.115011	0.094652	0.0909572	0.0720075	0.0761771	0.0426814	0.0451252	0.0354402	0.0350227	0.0151588	0.0196229
17.8	0.181548	0.182255	0.116764	0.115179	0.0973832	0.0911077	0.0669273	0.0763072	0.0442787	0.0452547	0.0320753	0.0351574	0.0176596	0.019707
18	0.177005	0.182496	0.114588	0.115347	0.0910745	0.0912572	0.0664045	0.0764347	0.0465682	0.0453817	0.0321312	0.0352899	0.0168746	0.0197898
18.2	0.182004	0.182735	0.117328	0.115514	0.0902135	0.0914057	0.0714292	0.0765597	0.0414253	0.0455063	0.0286727	0.0354201	0.0216505	0.0198713
18.4	0.174213	0.182973	0.114083	0.11568	0.0959099	0.0915534	0.0671167	0.0766824	0.0479164	0.0456285	0.0314977	0.0355481	0.0170179	0.0199514
18.6	0.180536	0.183209	0.120113	0.115846	0.0972967	0.0917003	0.0747172	0.0768028	0.0455634	0.0457485	0.0367842	0.0356741	0.016417	0.0200303
18.8	0.181689	0.183444	0.124886	0.116011	0.0969052	0.0918464	0.0766327	0.0769211	0.0454946	0.0458663	0.046028	0.0357979	0.023069	0.0201079
19	0.18661	0.183677	0.126381	0.116176	0.101674	0.0919917	0.0775479	0.0770373	0.0497867	0.045982	0.0439536	0.0359198	0.0257166	0.0201843
19.2	0.178262	0.183909	0.116154	0.11634	0.0959827	0.0921363	0.0768287	0.0771515	0.0448412	0.0460956	0.0390288	0.0360398	0.016421	0.0202595
19.4	0.183277	0.18414	0.119136	0.116504	0.100867	0.0922802	0.0755121	0.0772639	0.0495145	0.0462072	0.0386995	0.0361578	0.0215127	0.0203335
19.6	0.179819	0.184369	0.119923	0.116667	0.101266	0.0924234	0.074509	0.0773744	0.0420908	0.0463169	0.0375531	0.036274	0.0195323	0.0204064
19.8	0.189204	0.184597	0.122676	0.116829	0.102118	0.092566	0.0793291	0.0774832	0.054555	0.0464247	0.0418583	0.0363884	0.021098	0.0204781
20	0.183316	0.184823	0.117229	0.116991	0.0985173	0.092708	0.076601	0.0775904	0.0466047	0.0465307	0.0393534	0.036501	0.0147896	0.0205488
20.2	0.175703	0.185048	0.112569	0.117152	0.092838	0.0928494	0.0705705	0.0776959	0.0387123	0.046635	0.0319905	0.0366119	0.00980047	0.0206184
20.4	0.175655	0.185271	0.114544	0.117312	0.0922476	0.0929902	0.068083	0.0777999	0.0343918	0.0467376	0.0309122	0.0367212	0.0119805	0.020687
20.6	0.181747	0.185493	0.11442	0.117472	0.0910642	0.0931304	0.0741532	0.0779025	0.0435265	0.0468385	0.033991	0.0368288	0.0209167	0.0207545
20.8	0.184633	0.185714	0.117756	0.117632	0.0954303	0.0932701	0.0777575	0.0780037	0.048928	0.0469378	0.0419815	0.0369348	0.0196329	0.0208211
21	0.183998	0.185933	0.11747	0.117791	0.100695	0.0934093	0.0756647	0.0781035	0.0508183	0.0470356	0.0357068	0.0370393	0.0220312	0.0208866
21.2	0.187225	0.186151	0.122291	0.117949	0.103275	0.093548	0.0737428	0.0782021	0.0484418	0.0471319	0.0380224	0.0371423	0.0196978	0.0209513
21.4	0.188578	0.186368	0.118633	0.118107	0.0964096	0.0936862	0.0795401	0.0782994	0.0492303	0.0472268	0.0423674	0.0372438	0.0242671	0.021015
21.6	0.181906	0.186583	0.124131	0.118264	0.101073	0.0938239	0.0759342	0.0783955	0.0496555	0.0473203	0.0455111	0.0373439	0.0248313	0.0210778
21.8	0.18447	0.186797	0.124415	0.118421	0.104864	0.0939612	0.0781436	0.0784905	0.0508021	0.0474124	0.0436941	0.0374426	0.0216863	0.0211397
22	0.188177	0.18701	0.120329	0.118577	0.100855	0.094098	0.082879	0.0785844	0.0431006	0.0475031	0.0398012	0.03754	0.0225107	0.0212007
22.2	0.182267	0.187221	0.121052	0.118732	0.0974332	0.0942344	0.0754119	0.0786773	0.0438599	0.0475927	0.0318813	0.037636	0.0150969	0.0212609
22.4	0.186958	0.187431	0.126028	0.118887	0.102654	0.0943704	0.0811189	0.0787692	0.0534663	0.0476809	0.0433104	0.0377308	0.0216076	0.0213202
22.6	0.184317	0.18764	0.122681	0.119042	0.100286	0.0945059	0.0765703	0.0788601	0.0476258	0.047768	0.0399513	0.0378242	0.0241191	0.0213788
22.8	0.190114	0.187847	0.125038	0.119195	0.106681	0.094641	0.0801779	0.0789501	0.0538177	0.0478539	0.0443598	0.0379165	0.0248702	0.0214365
23	0.18891	0.188053	0.128401	0.119349	0.101253	0.0947758	0.0814887	0.0790392	0.0494459	0.0479388	0.0439334	0.0380076	0.0205873	0.0214935
23.2	0.182756	0.188258	0.125674	0.119502	0.0987521	0.0949101	0.0775016	0.0791275	0.0488004	0.0480225	0.0440385	0.0380975	0.022262	0.0215497
23.4	0.193052	0.188461	0.129191	0.119654	0.112923	0.0950441	0.0883193	0.079215	0.0550769	0.0481051	0.0479405	0.0381862	0.0261695	0.0216052
23.6	0.183497	0.188663	0.125074	0.119806	0.0975259	0.0951776	0.0785689	0.0793016	0.0485171	0.0481868	0.0406882	0.0382739	0.0219741	0.02166
23.8	0.186473	0.188864	0.125691	0.119957	0.104645	0.0953109	0.0812762	0.0793875	0.0469746	0.0482674	0.0408178	0.0383605	0.0167414	0.021714
24	0.193137	0.189064	0.127197	0.120107	0.105134	0.0954437	0.0828844	0.0794727	0.054822	0.0483471	0.044173	0.038446	0.0233183	0.0217674
24.2	0.183803	0.189263	0.120803	0.120258	0.10026	0.0955762	0.0795667	0.0795572	0.0468278	0.0484258	0.0369362	0.0385306	0.0185116	0.0218201
24.4	0.187085	0.18946	0.131924	0.120407	0.107535	0.0957083	0.0808905	0.0796411	0.0520142	0.0485037	0.0472749	0.0386141	0.0292203	0.0218721
24.6	0.185691	0.189656	0.1248	0.120556	0.100961	0.0958401	0.0782523	0.0797242	0.0509719	0.0485807	0.0457999	0.0386966	0.0235274	0.0219235
24.8	0.193073	0.189851	0.125527	0.120705	0.106247	0.0959716	0.0841846	0.0798068	0.0487932	0.0486568	0.0433984	0.0387782	0.0224122	0.0219743
25	0.199557	0.190044	0.12978	0.120853	0.105412	0.0961027	0.0837359	0.0798888	0.0588914	0.0487321	0.0450346	0.0388589	0.0273349	0.0220244
25.2	0.191596	0.190237	0.125359	0.121	0.111442	0.0962335	0.0851195	0.0799702	0.0477579	0.0488066	0.0447983	0.0389387	0.0259298	0.0220739
25.4	0.190747	0.190428	0.133163	0.121147	0.105053	0.0963639	0.0846295	0.080051	0.0564181	0.0488804	0.0394834	0.0390176	0.0249921	0.0221229
25.6	0.192447	0.190618	0.129801	0.121294	0.107271	0.096494	0.0824831	0.0801313	0.0545217	0.0489533	0.0444989	0.0390956	0.0274289	0.0221712
25.8	0.189201	0.190807	0.130833	0.12144	0.103428	0.0966239	0.0826587	0.0802111	0.051791	0.0490256	0.042419	0.0391728	0.0263966	0.022219
26	0.189361	0.190995	0.128335	0.121585	0.104283	0.0967533	0.0823548	0.0802904	0.0483914	0.0490971	0.0439123	0.0392492	0.0243439	0.0222663
26.2	0.191583	0.191181	0.126842	0.12173	0.105719	0.0968825	0.0876279	0.0803693	0.0524913	0.049168	0.0483646	0.0393248	0.0238836	0.022313
26.4	0.186129	0.191366	0.121773	0.121874	0.10406	0.0970114	0.0740881	0.0804476	0.0472419	0.0492382	0.0464218	0.0393996	0.024289	0.0223591
26.6	0.190256	0.191551	0.129439	0.122018	0.108532	0.0971399	0.0847158	0.0805256	0.0530204	0.0493078	0.0439523	0.0394736	0.0225894	0.0224048
26.8	0.191873	0.191734	0.125557	0.122162	0.0988492	0.0972681	0.0771734	0.080603	0.0512765	0.0493767	0.041622	0.039547	0.0207306	0.02245
27	0.178664	0.191916	0.120145	0.122304	0.0970227	0.0973961	0.0740933	0.0806801	0.0450063	0.049445	0.036784	0.0396196	0.0157205	0.0224946
27.2	0.18795	0.192096	0.121741	0.122447	0.0979342	0.0975237	0.0740345	0.0807568	0.0437065	0.0495127	0.0400836	0.0396915	0.0201785	0.0225388
27.4	0.18556	0.192276	0.125395	0.122589	0.0981748	0.097651	0.0789498	0.0808331	0.0500992	0.0495799	0.0431047	0.0397627	0.0192469	0.0225825
27.6	0.197028	0.192454	0.124538	0.12273	0.110488	0.0977781	0.0881022	0.080909	0.0493284	0.0496465	0.0430133	0.0398332	0.0275859	0.0226258
27.8	0.192889	0.192632	0.12596	0.122871	0.102359	0.0979048	0.0829522	0.0809846	0.04613	0.0497126	0.044532	0.0399031	0.0255118	0.0226686
28	0.19549	0.192808	0.130547	0.123011	0.106613	0.0980313	0.0850504	0.0810598	0.0479643	0.0497781	0.0450481	0.0399724	0.0227759	0.0227109
28.2	0.192972	0.192983	0.124727	0.123151	0.101384	0.0981574	0.0816105	0.0811347	0.0449444	0.0498432	0.0366265	0.040041	0.0185111	0.0227529
28.4	0.191886	0.193158	0.129181	0.12329	0.101044	0.0982833	0.07825	0.0812092	0.0473887	0.0499077	0.0382817	0.0401091	0.0213698	0.0227944
28.6	0.18951	0.193331	0.126708	0.123429	0.103355	0.0984089	0.0768419	0.0812834	0.0520066	0.0499718	0.0418984	0.0401765	0.0241642	0.0228355
28.8	0.196694	0.193503	0.127105	0.123568	0.105345	0.0985341	0.0845265	0.0813574	0.055441	0.0500354	0.0444446	0.0402434	0.0241443	0.0228762
29	0.192812	0.193674	0.131113	0.123706	0.107545	0.0986591	0.0833942	0.081431	0.0497262	0.0500985	0.042496	0.0403097	0.0221107	0.0229165
29.2	0.18605	0.193843	0.124855	0.123843	0.101733	0.0987839	0.080979	0.0815043	0.050007	0.0501612	0.0386688	0.0403755	0.0206868	0.0229564
29.4	0.193993	0.194012	0.131089	0.12398	0.109278	0.0989083	0.0881406	0.0815774	0.0592703	0.0502235	0.0413802	0.0404407	0.0243739	0.0229959
29.6	0.194573	0.19418	0.129611	0.124116	0.107915	0.0990325	0.0874862	0.0816501	0.0540319	0.0502853	0.0512005	0.0405054	0.0274389	0.0230351
29.8	0.195048	0.194347	0.130387	0.124252	0.109479	0.0991563	0.0833544	0.0817226	0.0537655	0.0503468	0.0482836	0.0405696	0.0260551	0.0230739
30	0.192816	0.194512	0.127036	0.124388	0.102681	0.0992799	0.0827907	0.0817949	0.0497472	0.0504079	0.0413116	0.0406333	0.0168257	0.0231123
30.2	0.195627	0.194677	0.13083	0.124523	0.105396	0.0994032	0.0824081	0.0818669	0.0510294	0.0504686	0.0475218	0.0406965	0.0253258	0.0231504
30.4	0.192733	0.194841	0.12295	0.124657	0.102066	0.0995263	0.0807903	0.0819387	0.0504291	0.0505289	0.0439766	0.0407592	0.0243184	0.0231882
30.6	0.197469	0.195003	0.134776	0.124791	0.105785	0.099649	0.0823426	0.0820102	0.048202	0.0505888	0.0430438	0.0408215	0.0241966	0.0232256
30.8	0.197932	0.195165	0.125998	0.124925	0.103097	0.0997715	0.0853643	0.0820815	0.0522135	0.0506484	0.0454912	0.0408833	0.0197011	0.0232627
31	0.193687	0.195325	0.128888	0.125058	0.107188	0.0998937	0.0822321	0.0821525	0.0498205	0.0507077	0.0437936	0.0409447	0.0244334	0.0232995
31.2	0.190255	0.195485	0.122997	0.125191	0.0993043	0.100016	0.0786541	0.0822234	0.0437301	0.0507666	0.0372531	0.0410057	0.0163489	0.023336
31.4	0.192788	0.195643	0.127818	0.125323	0.103231	0.100137	0.0775511	0.082294	0.0509219	0.0508252	0.0463431	0.0410662	0.0229623	0.0233722
31.6	0.186291	0.195801	0.126785	0.125455	0.104657	0.100259	0.0763884	0.0823644	0.0498394	0.0508835	0.0385508	0.0411264	0.018147	0.0234081
31.8	0.193459	0.195958	0.12522	0.125586	0.101493	0.10038	0.0789572	0.0824346	0.0515523	0.0509415	0.0424817	0.0411861	0.016026	0.0234437
32	0.189851	0.196113	0.128197	0.125717	0.103767	0.100501	0.086211	0.0825046	0.0494366	0.0509992	0.0457378	0.0412454	0.0238681	0.023479
32.2	0.192796	0.196268	0.136984	0.125847	0.108204	0.100621	0.0861175	0.0825745	0.0521977	0.0510566	0.0456253	0.0413044	0.0225811	0.023514
32.4	0.19141	0.196422	0.12418	0.125977	0.0993097	0.100742	0.0724009	0.0826441	0.0469158	0.0511137	0.0410002	0.0413629	0.0239056	0.0235488
32.6	0.196074	0.196575	0.128616	0.126106	0.108188	0.100862	0.0861842	0.0827135	0.0537976	0.0511706	0.0405403	0.0414212	0.0222478	0.0235832
32.8	0.192313	0.196726	0.127091	0.126235	0.105689	0.100982	0.0787873	0.0827828	0.0504331	0.0512271	0.03963	0.041479	0.0187756	0.0236175
33	0.19419	0.196877	0.129769	0.126364	0.107986	0.101101	0.0817768	0.0828519	0.0526926	0.0512835	0.0426086	0.0415365	0.0221333	0.0236515
33.2	0.202887	0.197027	0.133406	0.126492	0.107837	0.10122	0.088809	0.0829208	0.0537211	0.0513395	0.0520007	0.0415937	0.0308274	0.0236852
33.4	0.194473	0.197176	0.127051	0.126619	0.100491	0.101339	0.0850864	0.0829895	0.0468476	0.0513953	0.0406099	0.0416505	0.0195269	0.0237187
33.6	0.199478	0.197324	0.132957	0.126746	0.109913	0.101458	0.0871343	0.0830581	0.0536208	0.0514509	0.0445993	0.041707	0.0263637	0.0237519
33.8	0.195959	0.197471	0.129078	0.126873	0.105544	0.101577	0.0859162	0.0831265	0.0536321	0.0515062	0.0392888	0.0417632	0.0232101	0.0237849
34	0.196148	0.197618	0.124929	0.126999	0.108126	0.101695	0.0802601	0.0831947	0.0492327	0.0515613	0.0425119	0.0418191	0.0207177	0.0238177
34.2	0.196269	0.197763	0.126243	0.127125	0.102241	0.101813	0.0816345	0.0832628	0.05247	0.0516162	0.0450393	0.0418747	0.0193276	0.0238502
34.4	0.199694	0.197907	0.130924	0.12725	0.107631	0.10193	0.0855181	0.0833307	0.0504458	0.0516709	0.0462879	0.04193	0.0259848	0.0238826
34.6	0.190485	0.198051	0.123377	0.127375	0.0987346	0.102048	0.0790106	0.0833985	0.0454637	0.0517253	0.0344615	0.041985	0.0161081	0.0239147
34.8	0.190781	0.198194	0.130999	0.1275	0.107413	0.102165	0.0832734	0.0834661	0.0531553	0.0517796	0.0448502	0.0420397	0.0273561	0.0239466
35	0.195626	0.198335	0.139268	0.127624	0.108326	0.102282	0.0895287	0.0835336	0.0572795	0.0518336	0.0466475	0.0420941	0.0253581	0.0239783
35.2	0.196967	0.198476	0.126483	0.127747	0.106622	0.102399	0.0828057	0.0836009	0.048098	0.0518875	0.0424177	0.0421483	0.0230438	0.0240098
35.4	0.196931	0.198616	0.129583	0.127871	0.104387	0.102515	0.0853421	0.0836681	0.0471259	0.0519411	0.0402877	0.0422022	0.0243523	0.0240411
35.6	0.19302	0.198755	0.130477	0.127993	0.112043	0.102631	0.0766934	0.0837351	0.0550636	0.0519946	0.0439757	0.0422558	0.0253887	0.0240722
35.8	0.191088	0.198894	0.127498	0.128116	0.105415	0.102747	0.0825917	0.083802	0.049571	0.0520478	0.0419912	0.0423092	0.0201163	0.0241031
36	0.195712	0.199031	0.127739	0.128237	0.106928	0.102863	0.0832619	0.0838688	0.0547882	0.0521009	0.0419692	0.0423623	0.0206995	0.0241339
36.2	0.199628	0.199168	0.132531	0.128359	0.107251	0.102978	0.0838581	0.0839354	0.0581027	0.0521538	0.0415539	0.0424152	0.0257613	0.0241644
36.4	0.197549	0.199303	0.1281	0.12848	0.104042	0.103093	0.078136	0.0840019	0.0488156	0.0522066	0.0354013	0.0424679	0.0205874	0.0241948
36.6	0.201394	0.199438	0.132213	0.1286	0.107871	0.103208	0.0860919	0.0840682	0.0571192	0.0522592	0.0438998	0.0425203	0.0228088	0.024225
36.8	0.197828	0.199572	0.130977	0.12872	0.110278	0.103323	0.082387	0.0841344	0.0478365	0.0523116	0.0456367	0.0425725	0.0283643	0.024255
37	0.197497	0.199705	0.129099	0.12884	0.10639	0.103437	0.0824116	0.0842005	0.0504288	0.0523638	0.0457094	0.0426245	0.0247402	0.0242849
37.2	0.200494	0.199838	0.136285	0.128959	0.112697	0.103551	0.0935117	0.0842665	0.0545247	0.0524159	0.0471224	0.0426762	0.0251358	0.0243146
37.4	0.200862	0.199969	0.133102	0.129078	0.111851	0.103665	0.0867019	0.0843323	0.0587027	0.0524678	0.047398	0.0427278	0.029418	0.0243441
37.6	0.199276	0.2001	0.130528	0.129197	0.11038	0.103779	0.0886627	0.084398	0.0533206	0.0525196	0.0463197	0.0427791	0.0228591	0.0243735
37.8	0.199605	0.20023	0.127321	0.129315	0.111254	0.103892	0.0858899	0.0844636	0.0545495	0.0525712	0.0442373	0.0428303	0.0203905	0.0244027
38	0.201301	0.200359	0.131708	0.129432	0.108097	0.104006	0.0866764	0.0845291	0.0520438	0.0526227	0.0455353	0.0428812	0.0218055	0.0244318
38.2	0.194244	0.200487	0.132455	0.12955	0.11002	0.104118	0.0889079	0.0845944	0.0552593	0.0526741	0.0384766	0.0429319	0.0252333	0.0244607
38.4	0.200247	0.200615	0.133653	0.129666	0.108616	0.104231	0.0897713	0.0846597	0.0541488	0.0527253	0.0509007	0.0429825	0.029771	0.0244895
38.6	0.20009	0.200742	0.132127	0.129783	0.109129	0.104343	0.0858941	0.0847248	0.0478766	0.0527764	0.0426416	0.0430328	0.0242958	0.0245181
38.8	0.203106	0.200867	0.133501	0.129899	0.107612	0.104456	0.0904908	0.0847898	0.0579605	0.0528273	0.0457847	0.043083	0.0264743	0.0245466
39	0.199128	0.200993	0.127806	0.130014	0.107126	0.104568	0.0867512	0.0848546	0.0521903	0.0528781	0.0463333	0.043133	0.0223625	0.024575
39.2	0.197909	0.201117	0.12615	0.130129	0.107104	0.104679	0.0827101	0.0849194	0.0539219	0.0529288	0.0475614	0.0431828	0.0247543	0.0246032
39.4	0.195126	0.201241	0.130024	0.130244	0.107329	0.104791	0.0857369	0.084984	0.053585	0.0529793	0.0436684	0.0432324	0.0204591	0.0246313
39.6	0.201607	0.201363	0.129468	0.130359	0.111363	0.104902	0.0890953	0.0850486	0.0531285	0.0530297	0.0469428	0.0432819	0.0243011	0.0246592
39.8	0.204298	0.201485	0.136127	0.130472	0.108824	0.105013	0.0908725	0.085113	0.0521918	0.05308	0.0450637	0.0433312	0.0195014	0.0246871
40	0.2011	0.201607	0.14034	0.130586	0.112217	0.105123	0.0870073	0.0851773	0.0573083	0.0531302	0.0445288	0.0433803	0.0275021	0.0247148
40.2	0.195382	0.201727	0.127827	0.130699	0.109777	0.105234	0.0837041	0.0852415	0.051785	0.0531803	0.0466183	0.0434293	0.0226626	0.0247424
40.4	0.201131	0.201847	0.132888	0.130812	0.106704	0.105344	0.0850178	0.0853055	0.0526309	0.0532302	0.0461523	0.0434781	0.0252074	0.0247698
40.6	0.197134	0.201966	0.133563	0.130924	0.105397	0.105454	0.089078	0.0853695	0.0515091	0.05328	0.048508	0.0435268	0.023815	0.0247972
40.8	0.208213	0.202084	0.134932	0.131036	0.111721	0.105564	0.0918803	0.0854334	0.0556591	0.0533298	0.0503406	0.0435753	0.0312903	0.0248244
41	0.196982	0.202202	0.134134	0.131148	0.108389	0.105673	0.0832455	0.0854971	0.0541006	0.0533794	0.0481578	0.0436237	0.023631	0.0248516
41.2	0.20455	0.202319	0.136089	0.131259	0.112838	0.105783	0.0938105	0.0855608	0.0571702	0.0534289	0.0445611	0.0436719	0.0262461	0.0248786
41.4	0.196572	0.202435	0.129582	0.13137	0.107274	0.105892	0.083264	0.0856243	0.0503199	0.0534783	0.0415075	0.04372	0.0173751	0.0249055
41.6	0.199229	0.20255	0.133751	0.13148	0.111205	0.106	0.0849992	0.0856878	0.056451	0.0535276	0.0468034	0.0437679	0.0233736	0.0249323
41.8	0.200789	0.202665	0.133291	0.13159	0.111328	0.106109	0.083292	0.0857511	0.0550137	0.0535768	0.0430918	0.0438157	0.0211749	0.024959
42	0.196164	0.202779	0.129204	0.131699	0.108337	0.106217	0.0853699	0.0858143	0.0533534	0.0536258	0.0447715	0.0438633	0.0278111	0.0249856
42.2	0.203662	0.202892	0.138624	0.131809	0.109124	0.106325	0.0867021	0.0858774	0.0601074	0.0536748	0.0463163	0.0439109	0.0231037	0.025012
42.4	0.203947	0.203005	0.12685	0.131917	0.10583	0.106433	0.0811187	0.0859404	0.049574	0.0537237	0.0429096	0.0439583	0.0231331	0.0250384
42.6	0.207595	0.203117	0.136941	0.132026	0.116981	0.106541	0.0922659	0.0860033	0.0624508	0.0537725	0.047831	0.0440055	0.0290957	0.0250647
42.8	0.206501	0.203228	0.132657	0.132134	0.105596	0.106648	0.0832318	0.0860662	0.0502621	0.0538212	0.0407408	0.0440527	0.0212408	0.0250909
43	0.204928	0.203338	0.136922	0.132242	0.109871	0.106755	0.0914919	0.0861289	0.0592153	0.0538698	0.0530719	0.0440997	0.029472	0.025117
43.2	0.21372	0.203448	0.136768	0.132349	0.115629	0.106862	0.0922771	0.0861915	0.0645102	0.0539183	0.0520895	0.0441466	0.0310763	0.0251431
43.4	0.200403	0.203557	0.126837	0.132456	0.107002	0.106969	0.0829579	0.086254	0.048058	0.0539667	0.0428277	0.0441934	0.0163433	0.025169
43.6	0.202195	0.203666	0.126727	0.132562	0.10714	0.107075	0.0861237	0.0863164	0.0540517	0.0540151	0.0451675	0.0442401	0.0236916	0.0251948
43.8	0.197287	0.203773	0.130284	0.132668	0.111206	0.107181	0.0849851	0.0863787	0.055296	0.0540633	0.0443052	0.0442866	0.0269417	0.0252206
44	0.201175	0.20388	0.132172	0.132774	0.111368	0.107287	0.0897436	0.0864409	0.0561132	0.0541114	0.0461192	0.044333	0.0276364	0.0252462
44.2	0.194579	0.203987	0.126002	0.13288	0.105351	0.107393	0.0844684	0.086503	0.0522358	0.0541595	0.0425125	0.0443793	0.0217507	0.0252718
44.4	0.202404	0.204093	0.137957	0.132985	0.112199	0.107498	0.08728	0.086565	0.0598093	0.0542075	0.0467028	0.0444256	0.0265659	0.0252973
44.6	0.205017	0.204198	0.131355	0.133089	0.110593	0.107604	0.090189	0.0866269	0.0591526	0.0542554	0.042271	0.0444717	0.024699	0.0253227
44.8	0.207555	0.204302	0.141031	0.133194	0.115683	0.107709	0.0925259	0.0866887	0.0593817	0.0543032	0.0546994	0.0445177	0.0350904	0.0253481
45	0.201527	0.204406	0.137066	0.133298	0.115678	0.107813	0.0873881	0.0867504	0.0591208	0.0543509	0.0475204	0.0445635	0.0268464	0.0253733
45.2	0.205898	0.204509	0.136012	0.133401	0.108849	0.107918	0.0901166	0.086812	0.0586995	0.0543985	0.0480839	0.0446093	0.0277928	0.0253985
45.4	0.208504	0.204612	0.136966	0.133504	0.112883	0.108022	0.0885332	0.0868735	0.060682	0.0544461	0.0468997	0.044655	0.0314525	0.0254236
45.6	0.199099	0.204714	0.135048	0.133607	0.107766	0.108127	0.087747	0.0869349	0.0521378	0.0544936	0.0445706	0.0447006	0.0222466	0.0254486
45.8	0.212199	0.204815	0.142589	0.13371	0.113475	0.10823	0.0935042	0.0869962	0.0584376	0.054541	0.0543828	0.0447461	0.0308264	0.0254736
46	0.20496	0.204915	0.135978	0.133812	0.113158	0.108334	0.0909019	0.0870575	0.0561076	0.0545883	0.0463284	0.0447915	0.0273098	0.0254985
46.2	0.196971	0.205015	0.131641	0.133913	0.107091	0.108437	0.0853672	0.0871186	0.0506686	0.0546356	0.0439715	0.0448368	0.023377	0.0255233
46.4	0.20647	0.205115	0.133362	0.134015	0.110801	0.108541	0.0894467	0.0871796	0.0554142	0.0546827	0.0432634	0.044882	0.0253796	0.0255481
46.6	0.204446	0.205213	0.137976	0.134116	0.108837	0.108644	0.0914279	0.0872406	0.0545439	0.0547298	0.0447927	0.0449271	0.025228	0.0255727
46.8	0.207338	0.205312	0.136563	0.134217	0.119632	0.108746	0.0900782	0.0873014	0.0583005	0.0547769	0.0502349	0.0449721	0.0267876	0.0255973
47	0.207295	0.205409	0.144073	0.134317	0.115607	0.108849	0.0947043	0.0873621	0.0614094	0.0548238	0.0541983	0.045017	0.0260704	0.0256219
47.2	0.207143	0.205506	0.143366	0.134417	0.113089	0.108951	0.0889362	0.0874228	0.0596944	0.0548707	0.0497039	0.0450619	0.0283412	0.0256464
47.4	0.200901	0.205602	0.132581	0.134516	0.11373	0.109053	0.0879031	0.0874833	0.0508535	0.0549175	0.0448509	0.0451066	0.0228498	0.0256708
47.6	0.206349	0.205698	0.136969	0.134616	0.117309	0.109155	0.0917659	0.0875438	0.0607157	0.0549642	0.047673	0.0451513	0.0254379	0.0256951
47.8	0.204759	0.205793	0.13451	0.134715	0.111465	0.109257	0.0829037	0.0876042	0.0531252	0.0550109	0.0459298	0.0451959	0.0254626	0.0257194
48	0.204846	0.205888	0.134638	0.134813	0.107539	0.109358	0.0887116	0.0876645	0.0545799	0.0550575	0.0436358	0.0452404	0.0230089	0.0257437
48.2	0.208508	0.205982	0.139645	0.134911	0.117946	0.109459	0.0932808	0.0877246	0.0599106	0.055104	0.0495966	0.0452848	0.0289236	0.0257678
48.4	0.204621	0.206075	0.136373	0.135009	0.116827	0.10956	0.0868584	0.0877847	0.0566933	0.0551504	0.0530405	0.0453291	0.0302523	0.0257919
48.6	0.202249	0.206168	0.137149	0.135107	0.116816	0.109661	0.0878114	0.0878447	0.0594539	0.0551968	0.0508543	0.0453734	0.0290305	0.025816
48.8	0.21282	0.20626	0.140549	0.135204	0.115946	0.109762	0.092423	0.0879046	0.0593326	0.0552431	0.050171	0.0454175	0.0280334	0.02584
49	0.205215	0.206352	0.13748	0.135301	0.114599	0.109862	0.0934374	0.0879644	0.0659235	0.0552893	0.0509909	0.0454616	0.0280808	0.0258639
49.2	0.202084	0.206443	0.130486	0.135397	0.109985	0.109962	0.088092	0.0880241	0.055363	0.0553355	0.0433674	0.0455056	0.0219072	0.0258878
49.4	0.207344	0.206533	0.136331	0.135493	0.114838	0.110062	0.0892454	0.0880838	0.0576672	0.0553816	0.0503816	0.0455496	0.0236558	0.0259117
49.6	0.207509	0.206623	0.139895	0.135589	0.113753	0.110162	0.0903276	0.0881433	0.0564989	0.0554277	0.0516308	0.0455934	0.0308092	0.0259354
49.8	0.198812	0.206712	0.132866	0.135685	0.110719	0.110261	0.0851785	0.0882028	0.0507936	0.0554736	0.0443943	0.0456372	0.0221554	0.0259591
50	0.20466	0.206801	0.133644	0.13578	0.104811	0.11036	0.0837868	0.0882621	0.0522389	0.0555195	0.0412707	0.0456809	0.0242393	0.0259828
50.2	0.209104	0.20689	0.136393	0.135875	0.112561	0.110459	0.0879022	0.0883214	0.0564106	0.0555654	0.0451168	0.0457246	0.0264573	0.0260064
50.4	0.206993	0.206977	0.134339	0.135969	0.113043	0.110558	0.088301	0.0883805	0.0529421	0.0556112	0.0447425	0.0457681	0.0262404	0.02603
50.6	0.204544	0.207064	0.14016	0.136063	0.116637	0.110657	0.0920931	0.0884396	0.0563696	0.0556569	0.0513921	0.0458116	0.0304069	0.0260535
50.8	0.207253	0.207151	0.142247	0.136157	0.117731	0.110755	0.0991146	0.0884986	0.0636603	0.0557025	0.0542963	0.045855	0.0350523	0.026077
51	0.203601	0.207237	0.131687	0.13625	0.114554	0.110853	0.0898776	0.0885575	0.0598863	0.0557481	0.0490493	0.0458984	0.0265117	0.0261004
51.2	0.207179	0.207323	0.133465	0.136344	0.113872	0.110951	0.0872743	0.0886163	0.0537961	0.0557936	0.0474894	0.0459417	0.0244335	0.0261238
51.4	0.205768	0.207408	0.141709	0.136436	0.113432	0.111049	0.0948581	0.088675	0.0569099	0.0558391	0.0435477	0.0459849	0.0246185	0.0261471
51.6	0.204834	0.207492	0.134171	0.136529	0.111335	0.111146	0.0874547	0.0887337	0.0528519	0.0558845	0.048851	0.046028	0.0252859	0.0261704
51.8	0.206085	0.207576	0.138693	0.136621	0.116897	0.111244	0.0906156	0.0887922	0.0581982	0.0559298	0.0439816	0.0460711	0.02835	0.0261936
52	0.210017	0.20766	0.14154	0.136713	0.112014	0.111341	0.0922673	0.0888506	0.0539992	0.0559751	0.0533511	0.0461141	0.0285412	0.0262168
52.2	0.208842	0.207743	0.13903	0.136804	0.113768	0.111438	0.0946656	0.088909	0.0628886	0.0560203	0.0505616	0.0461571	0.0266267	0.0262399
52.4	0.203378	0.207825	0.134604	0.136895	0.110677	0.111534	0.0908637	0.0889673	0.0542822	0.0560655	0.0447848	0.0462	0.0274599	0.026263
52.6	0.199371	0.207907	0.136669	0.136986	0.110825	0.111631	0.0890833	0.0890255	0.0518294	0.0561105	0.0423193	0.0462428	0.0225913	0.0262861
52.8	0.213442	0.207988	0.141596	0.137077	0.11369	0.111727	0.0901063	0.0890835	0.0573087	0.0561556	0.0521114	0.0462855	0.0292168	0.0263091
53	0.216269	0.208069	0.136304	0.137167	0.119487	0.111823	0.0935441	0.0891416	0.0577879	0.0562006	0.0491713	0.0463282	0.0287638	0.026332
53.2	0.204208	0.20815	0.131883	0.137257	0.113847	0.111919	0.0852824	0.0891995	0.0529897	0.0562455	0.0470826	0.0463709	0.0217364	0.026355
53.4	0.212321	0.208229	0.135616	0.137347	0.118743	0.112014	0.0910155	0.0892573	0.0567027	0.0562903	0.0454392	0.0464134	0.027089	0.0263779
53.6	0.202486	0.208309	0.13637	0.137436	0.114202	0.11211	0.0912701	0.089315	0.0558636	0.0563351	0.0485884	0.0464559	0.0233881	0.0264007
53.8	0.208284	0.208388	0.135327	0.137525	0.113811	0.112205	0.0893476	0.0893727	0.0560396	0.0563798	0.0461963	0.0464984	0.0249093	0.0264235
54	0.20667	0.208466	0.144034	0.137613	0.116371	0.1123	0.0945763	0.0894303	0.0599226	0.0564245	0.0535877	0.0465408	0.0286986	0.0264462
54.2	0.210555	0.208544	0.142574	0.137702	0.117407	0.112395	0.0952369	0.0894877	0.0606941	0.0564691	0.0523957	0.0465831	0.028276	0.026469
54.4	0.205431	0.208621	0.138106	0.13779	0.11525	0.112489	0.0924183	0.0895451	0.0612175	0.0565137	0.046046	0.0466254	0.0287769	0.0264916
54.6	0.201341	0.208698	0.136369	0.137877	0.113873	0.112584	0.0889045	0.0896024	0.049635	0.0565582	0.0418248	0.0466676	0.0225194	0.0265143
54.8	0.214196	0.208775	0.1456	0.137965	0.119159	0.112678	0.0930744	0.0896596	0.0645061	0.0566026	0.0524974	0.0467097	0.0359014	0.0265369
55	0.210857	0.208851	0.138205	0.138052	0.1166	0.112772	0.0903454	0.0897168	0.0603297	0.056647	0.0470481	0.0467518	0.0272039	0.0265595
55.2	0.208198	0.208926	0.13961	0.138139	0.116483	0.112865	0.0901364	0.0897738	0.0577586	0.0566914	0.0480931	0.0467938	0.0251512	0.026582
55.4	0.211219	0.209001	0.139087	0.138225	0.119855	0.112959	0.0958095	0.0898308	0.0605259	0.0567356	0.0504172	0.0468358	0.027698	0.0266045
55.6	0.20949	0.209076	0.14014	0.138311	0.113963	0.113052	0.0902503	0.0898876	0.0604972	0.0567799	0.0435568	0.0468777	0.0273985	0.0266269
55.8	0.207545	0.20915	0.1339	0.138397	0.109951	0.113145	0.0879683	0.0899444	0.0556284	0.056824	0.042511	0.0469196	0.0270992	0.0266494
56	0.202486	0.209224	0.136155	0.138483	0.111005	0.113238	0.0835651	0.0900011	0.05489	0.0568681	0.0457716	0.0469614	0.0251605	0.0266717
56.2	0.209501	0.209297	0.14043	0.138568	0.116845	0.113331	0.0878221	0.0900577	0.0590886	0.0569122	0.0547587	0.0470032	0.0315676	0.0266941
56.4	0.208346	0.20937	0.141479	0.138653	0.116841	0.113424	0.0908792	0.0901143	0.0613635	0.0569562	0.051628	0.0470449	0.0288632	0.0267164
56.6	0.208679	0.209442	0.139492	0.138738	0.112766	0.113516	0.0919873	0.0901707	0.0621918	0.0570001	0.0503734	0.0470865	0.0288463	0.0267387
56.8	0.204583	0.209514	0.135962	0.138822	0.110614	0.113608	0.0936388	0.090227	0.0516518	0.057044	0.0453154	0.0471281	0.0203733	0.0267609
57	0.219532	0.209585	0.141376	0.138906	0.12197	0.1137	0.100201	0.0902833	0.0672581	0.0570878	0.0568007	0.0471696	0.0336662	0.0267831
57.2	0.213753	0.209656	0.140885	0.13899	0.115657	0.113792	0.0929021	0.0903395	0.0600222	0.0571316	0.0512003	0.0472111	0.0281356	0.0268053
57.4	0.205075	0.209727	0.131398	0.139073	0.11108	0.113883	0.0872525	0.0903956	0.0568842	0.0571753	0.0430837	0.0472525	0.0237944	0.0268274
57.6	0.211852	0.209797	0.138765	0.139156	0.113658	0.113974	0.0910373	0.0904516	0.0577579	0.057219	0.0487836	0.0472939	0.024741	0.0268496
57.8	0.206868	0.209867	0.138999	0.139239	0.113492	0.114066	0.0925456	0.0905075	0.0618244	0.0572626	0.0502225	0.0473353	0.0279759	0.0268716
58	0.210428	0.209936	0.137532	0.139322	0.112379	0.114157	0.0888979	0.0905634	0.0570257	0.0573061	0.0521835	0.0473765	0.0262118	0.0268937
58.2	0.213611	0.210005	0.15075	0.139404	0.120539	0.114247	0.0966205	0.0906191	0.0653776	0.0573496	0.0557372	0.0474177	0.0358356	0.0269157
58.4	0.208479	0.210073	0.141967	0.139486	0.118543	0.114338	0.0895156	0.0906748	0.0610704	0.0573931	0.0473348	0.0474589	0.0303934	0.0269377
58.6	0.208329	0.210141	0.134965	0.139568	0.111082	0.114428	0.0897874	0.0907304	0.0553194	0.0574365	0.0430356	0.0475	0.023229	0.0269596
58.8	0.208232	0.210208	0.141636	0.139649	0.112597	0.114518	0.0923559	0.0907859	0.0569954	0.0574798	0.0485563	0.0475411	0.0256311	0.0269815
59	0.209539	0.210275	0.133088	0.13973	0.116608	0.114608	0.0924667	0.0908413	0.0545139	0.0575231	0.0499194	0.0475821	0.0270095	0.0270034
59.2	0.21051	0.210342	0.146584	0.139811	0.121281	0.114698	0.0986767	0.0908967	0.0598783	0.0575663	0.0554556	0.0476231	0.032858	0.0270253
59.4	0.211	0.210408	0.141855	0.139892	0.117163	0.114787	0.0951462	0.0909519	0.0591503	0.0576095	0.0493704	0.047664	0.0270796	0.0270471
59.6	0.213363	0.210474	0.14475	0.139972	0.120032	0.114877	0.0981999	0.0910071	0.0624112	0.0576526	0.0456628	0.0477049	0.0368073	0.0270689
59.8	0.214681	0.21054	0.144869	0.140052	0.113616	0.114966	0.0946288	0.0910622	0.0598232	0.0576957	0.0483792	0.0477457	0.0336149	0.0270907
60	0.208168	0.210605	0.141649	0.140132	0.113261	0.115055	0.089934	0.0911172	0.0536312	0.0577387	0.0490064	0.0477865	0.0287926	0.0271124
60.2	0.211446	0.210669	0.138713	0.140211	0.113792	0.115144	0.0957652	0.0911721	0.058017	0.0577817	0.045646	0.0478272	0.0321462	0.0271341
60.4	0.214951	0.210734	0.14344	0.14029	0.116682	0.115232	0.0885001	0.0912269	0.0584759	0.0578246	0.0488296	0.0478679	0.0277738	0.0271558
60.6	0.209301	0.210797	0.133033	0.140369	0.114473	0.11532	0.0912726	0.0912817	0.0589653	0.0578674	0.0491186	0.0479085	0.0274377	0.0271774
60.8	0.211846	0.210861	0.138913	0.140448	0.116257	0.115409	0.0895096	0.0913363	0.0533342	0.0579103	0.0511418	0.0479491	0.0298806	0.0271991
61	0.209564	0.210924	0.141603	0.140526	0.117405	0.115497	0.0930438	0.0913909	0.0589457	0.057953	0.0442878	0.0479896	0.0253522	0.0272207
61.2	0.2126	0.210986	0.137447	0.140604	0.112771	0.115584	0.0981685	0.0914454	0.0562646	0.0579957	0.047449	0.0480301	0.0220202	0.0272422
61.4	0.219102	0.211049	0.145914	0.140682	0.117893	0.115672	0.0996822	0.0914999	0.0665131	0.0580384	0.054876	0.0480705	0.0293946	0.0272638
61.6	0.203501	0.211111	0.136203	0.140759	0.109042	0.115759	0.0919681	0.0915542	0.0538178	0.058081	0.0407666	0.0481109	0.0182082	0.0272853
61.8	0.209159	0.211172	0.140302	0.140837	0.112397	0.115847	0.0921054	0.0916085	0.0620436	0.0581235	0.0453419	0.0481513	0.0296186	0.0273067
62	0.213839	0.211233	0.14501	0.140914	0.115769	0.115934	0.093313	0.0916626	0.0625216	0.058166	0.0501159	0.0481915	0.0304202	0.0273282
62.2	0.211257	0.211294	0.142792	0.14099	0.118806	0.11602	0.0978807	0.0917167	0.0609569	0.0582085	0.0468177	0.0482318	0.0292033	0.0273496
62.4	0.213445	0.211354	0.139588	0.141067	0.117612	0.116107	0.0923014	0.0917707	0.0575277	0.0582509	0.0520446	0.048272	0.0304111	0.027371
62.6	0.21417	0.211414	0.143316	0.141143	0.119462	0.116194	0.0935948	0.0918247	0.063582	0.0582932	0.0508427	0.0483122	0.0279229	0.0273924
62.8	0.214479	0.211474	0.139278	0.141219	0.116412	0.11628	0.0915388	0.0918785	0.0621491	0.0583355	0.0424179	0.0483523	0.0269703	0.0274137
63	0.208206	0.211533	0.142954	0.141294	0.115208	0.116366	0.0907627	0.0919323	0.0590936	0.0583777	0.0491058	0.0483923	0.027222	0.0274351
63.2	0.210092	0.211592	0.139015	0.14137	0.117094	0.116452	0.0924112	0.091986	0.0625382	0.0584199	0.0509063	0.0484323	0.0270119	0.0274564
63.4	0.208537	0.21165	0.140249	0.141445	0.108976	0.116537	0.0880327	0.0920396	0.0584182	0.0584621	0.0435474	0.0484723	0.0310201	0.0274776
63.6	0.215706	0.211708	0.142428	0.141519	0.117368	0.116623	0.0892401	0.0920931	0.0625341	0.0585042	0.0468236	0.0485122	0.0269956	0.0274989
63.8	0.21487	0.211766	0.139988	0.141594	0.119824	0.116708	0.0944006	0.0921465	0.0626439	0.0585462	0.047714	0.0485521	0.0309849	0.0275201
64	0.208869	0.211824	0.141284	0.141668	0.117128	0.116793	0.0932774	0.0921999	0.0628751	0.0585882	0.049664	0.048592	0.0279403	0.0275413
64.2	0.213043	0.211881	0.141428	0.141742	0.114345	0.116878	0.0933142	0.0922532	0.0593714	0.0586301	0.0516735	0.0486318	0.0331869	0.0275624
64.4	0.216426	0.211937	0.14261	0.141816	0.12101	0.116963	0.0970448	0.0923064	0.0656716	0.058672	0.0500799	0.0486715	0.0380445	0.0275836
64.6	0.204852	0.211994	0.133308	0.14189	0.117194	0.117048	0.0907408	0.0923595	0.0560005	0.0587139	0.050629	0.0487112	0.0244599	0.0276047
64.8	0.213405	0.21205	0.145876	0.141963	0.119188	0.117132	0.0934685	0.0924125	0.0613136	0.0587556	0.0511623	0.0487509	0.0295529	0.0276258
65	0.215292	0.212105	0.141843	0.142036	0.121338	0.117216	0.0920758	0.0924655	0.0596438	0.0587974	0.0476422	0.0487905	0.0289054	0.0276469
65.2	0.212576	0.212161	0.143845	0.142108	0.117834	0.1173	0.0946533	0.0925184	0.0579309	0.0588391	0.0493095	0.0488301	0.0272665	0.0276679
65.4	0.213939	0.212216	0.142092	0.142181	0.118833	0.117384	0.0917863	0.0925712	0.0619253	0.0588807	0.0461984	0.0488696	0.0292683	0.0276889
65.6	0.208728	0.21227	0.135776	0.142253	0.11454	0.117468	0.0900951	0.0926239	0.0499517	0.0589223	0.0468332	0.0489091	0.0241798	0.0277099
65.8	0.210042	0.212325	0.138602	0.142325	0.117835	0.117551	0.0914426	0.0926765	0.0594637	0.0589638	0.0489479	0.0489485	0.0237302	0.0277309
66	0.211811	0.212378	0.142676	0.142397	0.115797	0.117635	0.0920392	0.0927291	0.0607966	0.0590053	0.0469025	0.0489879	0.0256626	0.0277518
66.2	0.215226	0.212432	0.143365	0.142468	0.118182	0.117718	0.0969883	0.0927816	0.0629171	0.0590468	0.0495721	0.0490273	0.0290418	0.0277727
66.4	0.212994	0.212485	0.142459	0.142539	0.119775	0.117801	0.095268	0.092834	0.0574674	0.0590881	0.0468842	0.0490666	0.0227137	0.0277936
66.6	0.20974	0.212538	0.138669	0.14261	0.112671	0.117883	0.0863525	0.0928863	0.0553423	0.0591295	0.0440548	0.0491059	0.0208673	0.0278145
66.8	0.216543	0.212591	0.143932	0.142681	0.114791	0.117966	0.0961482	0.0929385	0.0614567	0.0591708	0.0468518	0.0491451	0.0301279	0.0278354
67	0.220528	0.212643	0.145965	0.142751	0.115181	0.118048	0.0991628	0.0929907	0.060031	0.059212	0.0483325	0.0491843	0.0282514	0.0278562
67.2	0.210189	0.212695	0.138883	0.142822	0.112012	0.118131	0.0874724	0.0930428	0.0563915	0.0592532	0.0472493	0.0492234	0.0259939	0.027877
67.4	0.213758	0.212747	0.147685	0.142892	0.113895	0.118213	0.0946491	0.0930948	0.0662148	0.0592944	0.0485391	0.0492625	0.0322651	0.0278978
67.6	0.216113	0.212798	0.144123	0.142961	0.119513	0.118295	0.0936399	0.0931467	0.0587228	0.0593354	0.0551286	0.0493016	0.028632	0.0279185
67.8	0.213749	0.212849	0.141682	0.143031	0.117171	0.118376	0.094894	0.0931986	0.0599343	0.0593765	0.0529463	0.0493406	0.030464	0.0279393
68	0.215933	0.2129	0.140973	0.1431	0.11987	0.118458	0.092734	0.0932503	0.0647033	0.0594175	0.0554307	0.0493796	0.0263244	0.02796
68.2	0.21403	0.21295	0.138837	0.143169	0.117113	0.118539	0.0926112	0.093302	0.0618334	0.0594584	0.0444684	0.0494185	0.026818	0.0279807
68.4	0.216462	0.213	0.139005	0.143238	0.118319	0.11862	0.0927428	0.0933537	0.0595892	0.0594993	0.0504493	0.0494574	0.0236663	0.0280013
68.6	0.210799	0.21305	0.141835	0.143306	0.117272	0.118701	0.0873703	0.0934052	0.0557813	0.0595402	0.0465404	0.0494963	0.0259477	0.028022
68.8	0.215025	0.213099	0.140335	0.143374	0.116989	0.118782	0.0981304	0.0934566	0.062752	0.059581	0.0481444	0.0495351	0.0270333	0.0280426
69	0.210689	0.213148	0.135454	0.143442	0.11234	0.118863	0.0913057	0.093508	0.0558611	0.0596217	0.0438512	0.0495738	0.024563	0.0280632
69.2	0.218609	0.213197	0.143754	0.14351	0.123535	0.118943	0.0951925	0.0935593	0.0667086	0.0596625	0.0552621	0.0496126	0.0328932	0.0280838
69.4	0.212424	0.213246	0.141094	0.143577	0.112664	0.119023	0.09436	0.0936106	0.0593464	0.0597031	0.0509328	0.0496512	0.0292182	0.0281043
69.6	0.214236	0.213294	0.14468	0.143645	0.121041	0.119103	0.093687	0.0936617	0.0658916	0.0597437	0.0503492	0.0496899	0.0324829	0.0281249
69.8	0.217089	0.213342	0.146063	0.143712	0.120502	0.119183	0.0913792	0.0937128	0.0599994	0.0597843	0.0499214	0.0497285	0.0262369	0.0281454
70	0.218908	0.213389	0.143581	0.143779	0.120161	0.119263	0.0937909	0.0937638	0.0568859	0.0598248	0.0501027	0.049767	0.0257378	0.0281659
70.2	0.222625	0.213437	0.146212	0.143845	0.121154	0.119343	0.0964763	0.0938147	0.0632443	0.0598653	0.0523374	0.0498056	0.0365753	0.0281863
70.4	0.213647	0.213484	0.139383	0.143911	0.113006	0.119422	0.0924754	0.0938655	0.0568285	0.0599057	0.0513046	0.049844	0.025123	0.0282068
70.6	0.221435	0.213531	0.14518	0.143978	0.118636	0.119501	0.0978084	0.0939163	0.0538752	0.059946	0.049075	0.0498825	0.0295479	0.0282272
70.8	0.211434	0.213577	0.142008	0.144043	0.117937	0.11958	0.0923459	0.093967	0.0556816	0.0599864	0.0427994	0.0499209	0.0266505	0.0282476
71	0.210454	0.213623	0.144013	0.144109	0.117573	0.119659	0.0909767	0.0940176	0.0563815	0.0600266	0.0487847	0.0499592	0.0254861	0.028268
71.2	0.214817	0.213669	0.145097	0.144174	0.118111	0.119738	0.0952205	0.0940681	0.0619894	0.0600669	0.0487633	0.0499976	0.0281921	0.0282883
71.4	0.215206	0.213715	0.1486	0.14424	0.120334	0.119816	0.104393	0.0941186	0.0685853	0.060107	0.055968	0.0500358	0.0360294	0.0283087
71.6	0.218059	0.21376	0.147295	0.144305	0.122275	0.119895	0.096722	0.094169	0.0574714	0.0601472	0.0512044	0.0500741	0.0333927	0.028329
71.8	0.219192	0.213805	0.149239	0.144369	0.122211	0.119973	0.0977914	0.0942193	0.071149	0.0601873	0.0531342	0.0501123	0.0368602	0.0283493
72	0.217843	0.21385	0.147814	0.144434	0.122508	0.120051	0.0985363	0.0942695	0.0636301	0.0602273	0.0523481	0.0501504	0.0331011	0.0283696
72.2	0.221207	0.213894	0.145741	0.144498	0.116218	0.120129	0.0973044	0.0943196	0.0621175	0.0602673	0.0532391	0.0501885	0.0270227	0.0283898
72.4	0.216586	0.213938	0.146892	0.144562	0.125373	0.120206	0.0951768	0.0943697	0.0629024	0.0603072	0.0527304	0.0502266	0.0289766	0.0284101
72.6	0.215336	0.213982	0.145831	0.144626	0.115986	0.120284	0.0987463	0.0944197	0.0640555	0.0603471	0.0545975	0.0502646	0.0300252	0.0284303
72.8	0.215883	0.214026	0.144601	0.144689	0.120869	0.120361	0.0966749	0.0944696	0.0641464	0.060387	0.0548258	0.0503026	0.0309755	0.0284505
73	0.2197	0.214069	0.149887	0.144753	0.124695	0.120438	0.0960552	0.0945195	0.0604171	0.0604268	0.052826	0.0503406	0.0346411	0.0284706
73.2	0.215757	0.214112	0.143995	0.144816	0.120945	0.120515	0.0994897	0.0945693	0.0660604	0.0604665	0.054333	0.0503785	0.030603	0.0284908
73.4	0.2156	0.214155	0.13903	0.144879	0.1206	0.120592	0.0916215	0.094619	0.0554356	0.0605062	0.0489078	0.0504164	0.0264404	0.0285109
73.6	0.216538	0.214198	0.144317	0.144941	0.118663	0.120669	0.0979884	0.0946686	0.0644221	0.0605459	0.0510683	0.0504542	0.0328709	0.028531
73.8	0.21093	0.21424	0.146244	0.145004	0.11623	0.120745	0.0974114	0.0947181	0.0550787	0.0605855	0.0498475	0.050492	0.0282965	0.0285511
74	0.215727	0.214282	0.143706	0.145066	0.117984	0.120822	0.0935313	0.0947676	0.0564722	0.0606251	0.0451777	0.0505298	0.0297594	0.0285712
74.2	0.213003	0.214324	0.13618	0.145128	0.112854	0.120898	0.0918803	0.094817	0.0570873	0.0606646	0.0482303	0.0505675	0.0221861	0.0285912
74.4	0.214485	0.214365	0.148587	0.14519	0.121159	0.120974	0.0971475	0.0948663	0.0585338	0.0607041	0.0512191	0.0506052	0.0299383	0.0286113
74.6	0.209946	0.214407	0.14233	0.145251	0.11017	0.121049	0.091787	0.0949156	0.0567919	0.0607435	0.0464666	0.0506428	0.0230314	0.0286313
74.8	0.219	0.214448	0.146024	0.145313	0.122696	0.121125	0.0912601	0.0949648	0.0618699	0.0607829	0.0494246	0.0506804	0.0289423	0.0286512
75	0.21477	0.214488	0.14551	0.145374	0.116634	0.121201	0.093639	0.0950139	0.0565101	0.0608222	0.0505561	0.050718	0.025083	0.0286712
75.2	0.212103	0.214529	0.138992	0.145435	0.114302	0.121276	0.092072	0.0950629	0.0546581	0.0608615	0.04793	0.0507555	0.0237276	0.0286912
75.4	0.215276	0.214569	0.146447	0.145496	0.117183	0.121351	0.0963954	0.0951118	0.0620882	0.0609007	0.0528782	0.050793	0.0261602	0.0287111
75.6	0.212919	0.214609	0.143357	0.145556	0.11618	0.121426	0.0919424	0.0951607	0.0524814	0.0609399	0.0465722	0.0508305	0.0297075	0.028731
75.8	0.222062	0.214649	0.149437	0.145616	0.117932	0.121501	0.0984114	0.0952095	0.0628734	0.0609791	0.0456126	0.0508679	0.0293336	0.0287509
76	0.221702	0.214688	0.151899	0.145676	0.119714	0.121576	0.100215	0.0952583	0.0677656	0.0610182	0.0567296	0.0509053	0.029585	0.0287708
76.2	0.218587	0.214727	0.148078	0.145736	0.123711	0.12165	0.100633	0.0953069	0.0627307	0.0610572	0.0515386	0.0509426	0.0330541	0.0287906
76.4	0.217271	0.214766	0.151471	0.145796	0.122955	0.121724	0.097215	0.0953555	0.061345	0.0610962	0.0494241	0.0509799	0.0308072	0.0288104
76.6	0.218062	0.214805	0.145618	0.145855	0.117553	0.121799	0.0962209	0.095404	0.0578219	0.0611352	0.045561	0.0510171	0.0335657	0.0288302
76.8	0.222369	0.214844	0.147617	0.145915	0.117673	0.121873	0.0949985	0.0954524	0.0632446	0.0611741	0.0498779	0.0510544	0.0310857	0.02885
77	0.215432	0.214882	0.14888	0.145974	0.113873	0.121947	0.0917718	0.0955008	0.0608851	0.061213	0.0518652	0.0510915	0.0301462	0.0288698
77.2	0.216706	0.21492	0.145311	0.146032	0.119034	0.12202	0.0973611	0.0955491	0.060479	0.0612518	0.0510045	0.0511287	0.0294607	0.0288895
77.4	0.213165	0.214958	0.14826	0.146091	0.12	0.122094	0.0919711	0.0955973	0.0560283	0.0612906	0.0419178	0.0511658	0.0277306	0.0289093
77.6	0.217678	0.214995	0.140967	0.146149	0.118237	0.122167	0.0984525	0.0956455	0.057488	0.0613293	0.0503858	0.0512029	0.0292001	0.028929
77.8	0.218826	0.215033	0.147007	0.146208	0.121927	0.12224	0.0981516	0.0956935	0.062451	0.061368	0.0521147	0.0512399	0.0304904	0.0289487
78	0.21664	0.21507	0.151261	0.146266	0.121164	0.122313	0.0944001	0.0957415	0.0595232	0.0614067	0.0514579	0.0512769	0.0319134	0.0289684
78.2	0.214112	0.215107	0.146265	0.146323	0.119085	0.122386	0.0913295	0.0957895	0.0603516	0.0614453	0.0501829	0.0513138	0.0273461	0.028988
78.4	0.216481	0.215143	0.139781	0.146381	0.119731	0.122459	0.0918653	0.0958373	0.0589729	0.0614838	0.0486786	0.0513507	0.0281387	0.0290076
78.6	0.219434	0.21518	0.145345	0.146438	0.120279	0.122532	0.0932744	0.0958851	0.0640334	0.0615223	0.0509638	0.0513876	0.0288142	0.0290273
78.8	0.226172	0.215216	0.151712	0.146496	0.123761	0.122604	0.100302	0.0959328	0.0629896	0.0615608	0.0585205	0.0514244	0.0335522	0.0290469
79	0.217985	0.215252	0.147669	0.146553	0.124716	0.122676	0.0975108	0.0959804	0.062275	0.0615992	0.0525963	0.0514612	0.032525	0.0290664
79.2	0.221229	0.215288	0.146913	0.146609	0.120883	0.122748	0.0949932	0.096028	0.0604926	0.0616376	0.0536285	0.051498	0.0268501	0.029086
79.4	0.217853	0.215323	0.144376	0.146666	0.119743	0.12282	0.0920358	0.0960755	0.0626935	0.0616759	0.0475463	0.0515347	0.0284447	0.0291055
79.6	0.220651	0.215359	0.1454	0.146722	0.123072	0.122892	0.103563	0.0961229	0.0648111	0.0617142	0.0518109	0.0515714	0.0354044	0.029125
79.8	0.221895	0.215394	0.150662	0.146778	0.122344	0.122964	0.103139	0.0961703	0.0644749	0.0617524	0.0494194	0.0516081	0.0303447	0.0291445
80	0.215405	0.215429	0.149125	0.146834	0.121214	0.123035	0.094633	0.0962176	0.0616008	0.0617906	0.0491627	0.0516447	0.0321075	0.029164
80.2	0.217846	0.215463	0.147786	0.14689	0.120463	0.123107	0.0961573	0.0962648	0.0625335	0.0618288	0.0539249	0.0516813	0.0270603	0.0291835
80.4	0.215809	0.215498	0.152321	0.146946	0.120499	0.123178	0.0953479	0.0963119	0.0698499	0.0618669	0.0524526	0.0517178	0.0301844	0.0292029
80.6	0.216165	0.215532	0.143347	0.147001	0.120156	0.123249	0.0972838	0.096359	0.0602038	0.0619049	0.0473235	0.0517543	0.0272191	0.0292224
80.8	0.219487	0.215566	0.151665	0.147056	0.120874	0.12332	0.0972737	0.096406	0.0662218	0.0619429	0.0535656	0.0517908	0.0337775	0.0292418
81	0.215794	0.2156	0.146437	0.147111	0.115775	0.12339	0.092997	0.0964529	0.057302	0.0619809	0.0424337	0.0518272	0.0274438	0.0292612
81.2	0.217346	0.215633	0.148248	0.147166	0.125927	0.123461	0.0973616	0.0964997	0.0628698	0.0620188	0.0535152	0.0518636	0.03079	0.0292805
81.4	0.218389	0.215667	0.147331	0.147221	0.121255	0.123531	0.0960824	0.0965465	0.0625681	0.0620567	0.0496339	0.0518999	0.0304253	0.0292999
81.6	0.223208	0.2157	0.147366	0.147275	0.122205	0.123601	0.0980701	0.0965932	0.0600132	0.0620945	0.0547607	0.0519363	0.0251866	0.0293192
81.8	0.228023	0.215733	0.148742	0.147329	0.126871	0.123671	0.098898	0.0966399	0.0648961	0.0621323	0.0511537	0.0519725	0.0350706	0.0293385
82	0.217788	0.215765	0.147259	0.147383	0.114473	0.123741	0.0954969	0.0966864	0.0585857	0.0621701	0.0540781	0.0520088	0.0221677	0.0293578
82.2	0.222116	0.215798	0.148271	0.147437	0.120196	0.123811	0.101249	0.0967329	0.0678824	0.0622078	0.0547179	0.052045	0.0335071	0.0293771
82.4	0.220171	0.21583	0.142416	0.147491	0.121836	0.123881	0.0927428	0.0967794	0.0620178	0.0622454	0.0472665	0.0520811	0.0211108	0.0293964
82.6	0.219468	0.215863	0.147445	0.147544	0.125492	0.12395	0.096853	0.0968257	0.064466	0.062283	0.0583108	0.0521173	0.0312558	0.0294156
82.8	0.219682	0.215894	0.146697	0.147598	0.121116	0.12402	0.0953113	0.096872	0.0579012	0.0623206	0.0498904	0.0521534	0.0295066	0.0294348
83	0.217371	0.215926	0.148222	0.147651	0.124472	0.124089	0.0999234	0.0969182	0.0638283	0.0623581	0.0509241	0.0521894	0.0318643	0.029454
83.2	0.219011	0.215958	0.145813	0.147704	0.120449	0.124158	0.0992017	0.0969644	0.0599732	0.0623956	0.0543212	0.0522254	0.0278267	0.0294732
83.4	0.222794	0.215989	0.145917	0.147756	0.123723	0.124227	0.0988589	0.0970105	0.0637187	0.062433	0.0559026	0.0522614	0.0303417	0.0294924
83.6	0.22401	0.21602	0.152266	0.147809	0.120018	0.124295	0.099995	0.0970565	0.0645812	0.0624704	0.0542582	0.0522974	0.0320145	0.0295115
83.8	0.22686	0.216051	0.150138	0.147861	0.123448	0.124364	0.102281	0.0971024	0.0649039	0.0625078	0.0545207	0.0523333	0.0319641	0.0295306
84	0.215805	0.216082	0.145485	0.147913	0.11849	0.124432	0.0992338	0.0971483	0.0596478	0.0625451	0.0509379	0.0523692	0.0306632	0.0295498
84.2	0.224489	0.216113	0.145524	0.147965	0.119695	0.124501	0.0960666	0.0971941	0.0590227	0.0625823	0.0508866	0.052405	0.027062	0.0295689
84.4	0.230084	0.216143	0.155658	0.148017	0.1259	0.124569	0.0973472	0.0972398	0.0683879	0.0626195	0.0564864	0.0524408	0.0342188	0.0295879
84.6	0.223424	0.216173	0.14875	0.148069	0.119729	0.124637	0.0954041	0.0972855	0.0583144	0.0626567	0.0511166	0.0524766	0.025502	0.029607
84.8	0.218762	0.216203	0.148909	0.14812	0.11794	0.124705	0.102125	0.0973311	0.0628034	0.0626938	0.0525976	0.0525123	0.0304986	0.029626
85	0.215464	0.216233	0.13962	0.148171	0.124744	0.124772	0.0984928	0.0973766	0.0594731	0.0627309	0.0489116	0.052548	0.0271271	0.029645
85.2	0.222801	0.216263	0.145669	0.148222	0.12644	0.12484	0.096326	0.097422	0.0645536	0.062768	0.0485111	0.0525836	0.0310656	0.0296641
85.4	0.21932	0.216292	0.142443	0.148273	0.1183	0.124907	0.0930772	0.0974674	0.0601738	0.062805	0.048471	0.0526193	0.0296777	0.029683
85.6	0.224077	0.216321	0.146451	0.148324	0.116694	0.124974	0.0931618	0.0975128	0.0567047	0.0628419	0.0477333	0.0526549	0.0276642	0.029702
85.8	0.222047	0.216351	0.150968	0.148374	0.125154	0.125041	0.105988	0.097558	0.0652232	0.0628788	0.0543646	0.0526904	0.0292598	0.029721
86	0.221276	0.216379	0.145983	0.148425	0.121372	0.125108	0.0968674	0.0976032	0.0601697	0.0629157	0.0507464	0.0527259	0.0285952	0.0297399
86.2	0.222035	0.216408	0.147806	0.148475	0.11781	0.125175	0.103518	0.0976483	0.0627711	0.0629525	0.049051	0.0527614	0.0308565	0.0297588
86.4	0.226863	0.216437	0.150994	0.148525	0.126601	0.125242	0.0996681	0.0976933	0.065747	0.0629893	0.0527176	0.0527968	0.0292466	0.0297777
86.6	0.227581	0.216465	0.148075	0.148575	0.123678	0.125308	0.0959796	0.0977383	0.0616918	0.063026	0.0507554	0.0528322	0.0330925	0.0297966
86.8	0.224029	0.216493	0.151826	0.148624	0.119071	0.125375	0.0963094	0.0977832	0.0623445	0.0630627	0.0552428	0.0528676	0.0311682	0.0298154
87	0.22074	0.216521	0.146781	0.148674	0.119236	0.125441	0.0974962	0.0978281	0.0592075	0.0630994	0.0484318	0.0529029	0.0252302	0.0298343
87.2	0.221213	0.216549	0.14709	0.148723	0.129125	0.125507	0.100288	0.0978728	0.0630035	0.063136	0.0507205	0.0529382	0.030987	0.0298531
87.4	0.224801	0.216577	0.151055	0.148772	0.122257	0.125573	0.0976134	0.0979175	0.0653881	0.0631726	0.0542362	0.0529735	0.0314927	0.0298719
87.6	0.216168	0.216604	0.139223	0.148821	0.118927	0.125639	0.0969618	0.0979622	0.0558398	0.0632091	0.0487583	0.0530087	0.0295264	0.0298907
87.8	0.22164	0.216632	0.151315	0.14887	0.123349	0.125704	0.0973624	0.0980068	0.0583791	0.0632456	0.0534181	0.0530439	0.0315239	0.0299095
88	0.220065	0.216659	0.146761	0.148918	0.120892	0.12577	0.0976182	0.0980513	0.0600148	0.063282	0.0490586	0.0530791	0.0246335	0.0299282
88.2	0.219144	0.216686	0.147481	0.148967	0.125417	0.125835	0.0958084	0.0980957	0.0674911	0.0633184	0.0524333	0.0531142	0.0316637	0.029947
88.4	0.220847	0.216713	0.143482	0.149015	0.115564	0.1259	0.0949849	0.0981401	0.0595462	0.0633547	0.0476432	0.0531493	0.0291028	0.0299657
88.6	0.218443	0.216739	0.147359	0.149063	0.115872	0.125965	0.0947131	0.0981844	0.056248	0.063391	0.0434812	0.0531843	0.0261558	0.0299844
88.8	0.226093	0.216766	0.149012	0.149111	0.124802	0.12603	0.0994388	0.0982286	0.061527	0.0634273	0.050544	0.0532193	0.032741	0.0300031
89	0.215836	0.216792	0.148828	0.149159	0.119753	0.126095	0.0982561	0.0982728	0.0578548	0.0634635	0.0486298	0.0532543	0.0293163	0.0300217
89.2	0.219598	0.216818	0.149383	0.149206	0.125215	0.12616	0.10449	0.0983169	0.059561	0.0634997	0.0495996	0.0532893	0.0298328	0.0300404
89.4	0.224863	0.216844	0.149336	0.149254	0.123563	0.126224	0.0990628	0.0983609	0.0678433	0.0635358	0.0531412	0.0533242	0.0348647	0.030059
89.6	0.221085	0.21687	0.143102	0.149301	0.115868	0.126288	0.0933609	0.0984049	0.0621592	0.0635719	0.0457566	0.053359	0.0252966	0.0300776
89.8	0.224779	0.216896	0.147814	0.149348	0.121515	0.126353	0.0958169	0.0984488	0.0672476	0.063608	0.0573536	0.0533939	0.0280836	0.0300962
90	0.228607	0.216921	0.15235	0.149395	0.123957	0.126417	0.100066	0.0984926	0.0683922	0.063644	0.0534658	0.0534287	0.033511	0.0301148
90.2	0.222259	0.216947	0.146295	0.149442	0.123359	0.126481	0.0967387	0.0985364	0.0603692	0.06368	0.0518005	0.0534634	0.0294611	0.0301333
90.4	0.219836	0.216972	0.145401	0.149488	0.117943	0.126544	0.0915024	0.0985801	0.0594394	0.0637159	0.0479253	0.0534982	0.0269853	0.0301519
90.6	0.223827	0.216997	0.153612	0.149535	0.123499	0.126608	0.0941752	0.0986237	0.0628684	0.0637518	0.0487963	0.0535329	0.0310149	0.0301704
90.8	0.227433	0.217022	0.150511	0.149581	0.125946	0.126672	0.102048	0.0986673	0.0671346	0.0637876	0.0538652	0.0535675	0.0350566	0.0301889
91	0.216451	0.217047	0.140408	0.149627	0.117412	0.126735	0.0943648	0.0987108	0.0574191	0.0638234	0.0464837	0.0536022	0.0267101	0.0302074
91.2	0.217519	0.217071	0.145338	0.149673	0.11918	0.126798	0.097886	0.0987542	0.0613332	0.0638592	0.0516798	0.0536367	0.0321313	0.0302259
91.4	0.223864	0.217096	0.143469	0.149719	0.119831	0.126861	0.0966192	0.0987976	0.0582506	0.0638949	0.0481447	0.0536713	0.0293057	0.0302443
91.6	0.217752	0.21712	0.144264	0.149764	0.119461	0.126924	0.0964287	0.0988409	0.0602946	0.0639306	0.0528939	0.0537058	0.0292037	0.0302628
91.8	0.218621	0.217144	0.144956	0.14981	0.117668	0.126987	0.0953401	0.0988842	0.0614193	0.0639662	0.0525844	0.0537403	0.028629	0.0302812
92	0.223436	0.217168	0.155539	0.149855	0.125289	0.12705	0.0977446	0.0989273	0.0611344	0.0640018	0.0505769	0.0537748	0.0342025	0.0302996
92.2	0.225546	0.217192	0.147743	0.1499	0.124376	0.127112	0.0975957	0.0989705	0.0643116	0.0640373	0.0545499	0.0538092	0.0309215	0.030318
92.4	0.222633	0.217216	0.147138	0.149945	0.124411	0.127175	0.0949098	0.0990135	0.0596126	0.0640728	0.0506257	0.0538436	0.0281572	0.0303364
92.6	0.223883	0.217239	0.148182	0.14999	0.119644	0.127237	0.0965562	0.0990565	0.0598083	0.0641083	0.0511534	0.0538779	0.028191	0.0303547
92.8	0.230145	0.217263	0.149466	0.150034	0.126945	0.127299	0.102543	0.0990994	0.0660121	0.0641437	0.0552218	0.0539122	0.0295103	0.0303731
93	0.223434	0.217286	0.156148	0.150079	0.126707	0.127361	0.102887	0.0991423	0.0695894	0.0641791	0.0560111	0.0539465	0.0390874	0.0303914
93.2	0.223415	0.217309	0.149003	0.150123	0.123858	0.127423	0.103337	0.099185	0.0655463	0.0642144	0.0529206	0.0539807	0.0336388	0.0304097
93.4	0.224843	0.217332	0.152756	0.150167	0.126656	0.127485	0.0981265	0.0992278	0.0675697	0.0642497	0.0532916	0.0540149	0.031286	0.030428
93.6	0.225257	0.217355	0.14906	0.150211	0.125308	0.127546	0.104708	0.0992704	0.0637707	0.064285	0.0512042	0.0540491	0.0320893	0.0304462
93.8	0.228783	0.217377	0.147758	0.150255	0.129487	0.127608	0.101931	0.099313	0.0626322	0.0643202	0.0569913	0.0540833	0.0347519	0.0304645
94	0.229633	0.2174	0.152229	0.150299	0.128397	0.127669	0.106028	0.0993555	0.0693376	0.0643554	0.0566567	0.0541174	0.035336	0.0304827
94.2	0.225288	0.217422	0.146782	0.150343	0.120928	0.12773	0.0993601	0.099398	0.0648764	0.0643905	0.049105	0.0541514	0.0296837	0.0305009
94.4	0.228413	0.217445	0.158139	0.150386	0.129139	0.127791	0.100789	0.0994404	0.0670906	0.0644256	0.0538276	0.0541855	0.0299633	0.0305191
94.6	0.222946	0.217467	0.15416	0.150429	0.124625	0.127852	0.101941	0.0994827	0.0600621	0.0644607	0.0512042	0.0542195	0.0285384	0.0305373
94.8	0.231812	0.217489	0.153035	0.150472	0.131535	0.127913	0.108122	0.099525	0.0682729	0.0644957	0.0569524	0.0542534	0.0360949	0.0305555
95	0.229037	0.217511	0.149538	0.150515	0.1289	0.127974	0.105673	0.0995672	0.0675403	0.0645306	0.0562198	0.0542874	0.0362314	0.0305736
95.2	0.22481	0.217532	0.148498	0.150558	0.122796	0.128034	0.0992195	0.0996094	0.0657172	0.0645656	0.0518637	0.0543213	0.0330028	0.0305918
95.4	0.221331	0.217554	0.145475	0.150601	0.118318	0.128095	0.0981073	0.0996515	0.0604558	0.0646004	0.0469415	0.0543551	0.0271773	0.0306099
95.6	0.224046	0.217575	0.144686	0.150643	0.119583	0.128155	0.0989065	0.0996935	0.0603213	0.0646353	0.0503512	0.054389	0.0293808	0.030628
95.8	0.222475	0.217597	0.152068	0.150685	0.127672	0.128215	0.0961684	0.0997354	0.0596024	0.0646701	0.0590284	0.0544228	0.0375988	0.0306461
96	0.219639	0.217618	0.143082	0.150728	0.122108	0.128275	0.103592	0.0997773	0.0599063	0.0647049	0.0522753	0.0544565	0.0273928	0.0306641
96.2	0.216778	0.217639	0.146074	0.15077	0.121567	0.128335	0.0953432	0.0998191	0.0605929	0.0647396	0.0515947	0.0544903	0.0285596	0.0306822
96.4	0.220414	0.21766	0.148201	0.150811	0.124452	0.128395	0.0938795	0.0998609	0.0651466	0.0647743	0.0484265	0.054524	0.0229061	0.0307002
96.6	0.215341	0.217681	0.143536	0.150853	0.120268	0.128454	0.0954351	0.0999026	0.0595625	0.0648089	0.0514619	0.0545576	0.0214682	0.0307182
96.8	0.223007	0.217701	0.148527	0.150895	0.121534	0.128514	0.0978087	0.0999442	0.0595047	0.0648435	0.0486644	0.0545912	0.0250287	0.0307362
97	0.225971	0.217722	0.147214	0.150936	0.123171	0.128573	0.0999046	0.0999858	0.0661038	0.0648781	0.0542315	0.0546248	0.0307781	0.0307542
97.2	0.225637	0.217742	0.148456	0.150978	0.122869	0.128632	0.0989245	0.100027	0.0613166	0.0649126	0.0517557	0.0546584	0.0287432	0.0307722
97.4	0.224889	0.217762	0.153192	0.151019	0.125888	0.128691	0.102117	0.100069	0.0643838	0.064947	0.0518897	0.0546919	0.0329311	0.0307901
97.6	0.220319	0.217782	0.144557	0.15106	0.115866	0.12875	0.0967419	0.10011	0.0573404	0.0649815	0.0464799	0.0547254	0.0247118	0.0308081
97.8	0.228132	0.217802	0.150104	0.151101	0.12946	0.128809	0.105942	0.100151	0.0666418	0.0650159	0.0565054	0.0547589	0.0331212	0.030826
98	0.218928	0.217822	0.149843	0.151141	0.124895	0.128868	0.0971534	0.100193	0.0678042	0.0650502	0.0519654	0.0547923	0.0314524	0.0308439
98.2	0.221944	0.217842	0.149301	0.151182	0.121823	0.128927	0.0952507	0.100234	0.0636012	0.0650846	0.0490841	0.0548257	0.0278549	0.0308618
98.4	0.22265	0.217862	0.154378	0.151222	0.128899	0.128985	0.0965059	0.100275	0.0646319	0.0651188	0.050997	0.054859	0.035843	0.0308796
98.6	0.224768	0.217881	0.146471	0.151263	0.118353	0.129043	0.0984228	0.100316	0.0634935	0.0651531	0.0534138	0.0548924	0.0265172	0.0308975
98.8	0.219178	0.217901	0.148185	0.151303	0.119411	0.129101	0.0978534	0.100357	0.0631757	0.0651873	0.0462984	0.0549257	0.0278348	0.0309153
99	0.228927	0.21792	0.151851	0.151343	0.12664	0.12916	0.100343	0.100398	0.071385	0.0652214	0.0546049	0.0549589	0.0336381	0.0309331
99.2	0.221782	0.217939	0.156282	0.151383	0.125006	0.129217	0.0995052	0.100439	0.0617553	0.0652555	0.0526544	0.0549921	0.0361744	0.0309509
99.4	0.223742	0.217958	0.152718	0.151422	0.124105	0.129275	0.100143	0.10048	0.0591592	0.0652896	0.0549254	0.0550253	0.0317197	0.0309687
99.6	0.224614	0.217977	0.150655	0.151462	0.122008	0.129333	0.0993876	0.100521	0.0686691	0.0653236	0.0566427	0.0550585	0.0344845	0.0309865
99.8	0.227654	0.217996	0.15213	0.151501	0.124324	0.129391	0.0960316	0.100561	0.0657728	0.0653576	0.0526804	0.0550916	0.0319013	0.0310042
100	0.226203	0.218015	0.149734	0.151541	0.123968	0.129448	0.100609	0.100602	0.0637496	0.0653916	0.0529771	0.0551247	0.0308191	0.0310219
100.2	0.222831	0.218033	0.153392	0.15158	0.126176	0.129505	0.101702	0.100643	0.0565383	0.0654255	0.0519785	0.0551577	0.0289653	0.0310397
100.4	0.226164	0.218052	0.14911	0.151619	0.12681	0.129562	0.0989305	0.100683	0.0571206	0.0654594	0.0567974	0.0551908	0.0280892	0.0310574
100.6	0.22538	0.21807	0.151252	0.151658	0.126259	0.12962	0.104039	0.100724	0.0637653	0.0654932	0.0542539	0.0552238	0.0321566	0.031075
100.8	0.225137	0.218088	0.152003	0.151696	0.127389	0.129676	0.0996828	0.100764	0.0636298	0.065527	0.0524682	0.0552567	0.0270541	0.0310927
101	0.223148	0.218106	0.149855	0.151735	0.123673	0.129733	0.0973337	0.100804	0.0618292	0.0655608	0.0531174	0.0552896	0.0289168	0.0311104
101.2	0.224345	0.218124	0.147599	0.151773	0.122906	0.12979	0.0948439	0.100845	0.0636744	0.0655945	0.0458282	0.0553225	0.0275388	0.031128
101.4	0.224813	0.218142	0.152858	0.151812	0.130682	0.129847	0.106351	0.100885	0.0645863	0.0656282	0.0560007	0.0553554	0.033232	0.0311456
101.6	0.2261	0.21816	0.155767	0.15185	0.121474	0.129903	0.0948694	0.100925	0.0608575	0.0656618	0.052799	0.0553882	0.0323241	0.0311632
101.8	0.22351	0.218178	0.153432	0.151888	0.123908	0.129959	0.101022	0.100965	0.0643523	0.0656954	0.050627	0.055421	0.0258949	0.0311808
102	0.233292	0.218195	0.154923	0.151926	0.129337	0.130015	0.103435	0.101005	0.0694131	0.0657289	0.0561294	0.0554538	0.0358935	0.0311984
102.2	0.233913	0.218213	0.151145	0.151964	0.126507	0.130072	0.0992623	0.101045	0.065837	0.0657625	0.0506643	0.0554865	0.0337534	0.0312159
102.4	0.226274	0.21823	0.154441	0.152002	0.127571	0.130127	0.102756	0.101085	0.0644626	0.0657959	0.056525	0.0555192	0.0387818	0.0312335
102.6	0.224987	0.218247	0.148246	0.152039	0.121662	0.130183	0.0953537	0.101125	0.0573701	0.0658294	0.0505677	0.0555518	0.0263048	0.031251
102.8	0.231915	0.218264	0.157772	0.152076	0.133062	0.130239	0.103818	0.101165	0.0676157	0.0658628	0.0567641	0.0555845	0.0333024	0.0312685
103	0.224667	0.218281	0.147205	0.152114	0.114163	0.130295	0.0995179	0.101204	0.0562336	0.0658961	0.0467384	0.055617	0.0298777	0.031286
103.2	0.22928	0.218298	0.156518	0.152151	0.126493	0.13035	0.099279	0.101244	0.0683363	0.0659295	0.0535126	0.0556496	0.0358229	0.0313034
103.4	0.225271	0.218315	0.153626	0.152188	0.126881	0.130405	0.102201	0.101284	0.0668899	0.0659628	0.0586026	0.0556821	0.0349918	0.0313209
103.6	0.221978	0.218332	0.152341	0.152225	0.125506	0.130461	0.0960001	0.101323	0.0598704	0.065996	0.0465144	0.0557146	0.0267952	0.0313383
103.8	0.224831	0.218348	0.151013	0.152261	0.118941	0.130516	0.0958156	0.101363	0.0624729	0.0660292	0.0480046	0.0557471	0.0256822	0.0313558
104	0.228741	0.218365	0.149559	0.152298	0.121969	0.130571	0.0988536	0.101402	0.0621952	0.0660624	0.0514642	0.0557795	0.0303235	0.0313732
104.2	0.222757	0.218381	0.150637	0.152335	0.118966	0.130626	0.0994272	0.101441	0.0578397	0.0660955	0.0505345	0.0558119	0.030248	0.0313906
104.4	0.22284	0.218398	0.147082	0.152371	0.126725	0.13068	0.0994795	0.101481	0.0635193	0.0661286	0.0515818	0.0558443	0.0318639	0.0314079
104.6	0.227968	0.218414	0.155122	0.152407	0.127284	0.130735	0.106204	0.10152	0.0656157	0.0661616	0.0555393	0.0558766	0.035754	0.0314253
104.8	0.230052	0.21843	0.149373	0.152443	0.128863	0.130789	0.105814	0.101559	0.0667238	0.0661946	0.0502679	0.0559089	0.0326645	0.0314426
105	0.232829	0.218446	0.150496	0.152479	0.126667	0.130844	0.102476	0.101598	0.0651113	0.0662276	0.057492	0.0559412	0.0313449	0.03146
105.2	0.230449	0.218462	0.154869	0.152515	0.124264	0.130898	0.10341	0.101637	0.0657621	0.0662605	0.0534168	0.0559734	0.0314237	0.0314773
105.4	0.225011	0.218478	0.154273	0.152551	0.127484	0.130952	0.100063	0.101676	0.0637672	0.0662934	0.0528117	0.0560056	0.0271262	0.0314946
105.6	0.219563	0.218493	0.148049	0.152586	0.125886	0.131006	0.0996225	0.101715	0.0650249	0.0663263	0.0489091	0.0560378	0.0274695	0.0315119
105.8	0.224912	0.218509	0.14955	0.152622	0.129923	0.13106	0.0996883	0.101754	0.0625866	0.0663591	0.0463747	0.0560699	0.0270353	0.0315291
106	0.227755	0.218524	0.15487	0.152657	0.129958	0.131114	0.109134	0.101793	0.0602125	0.0663919	0.0524384	0.056102	0.0349766	0.0315464
106.2	0.228594	0.21854	0.155085	0.152692	0.124663	0.131168	0.105388	0.101832	0.0673598	0.0664246	0.0541775	0.0561341	0.0301237	0.0315636
106.4	0.23049	0.218555	0.157077	0.152728	0.127794	0.131221	0.0995561	0.101871	0.0645883	0.0664573	0.0576187	0.0561661	0.0340652	0.0315808
106.6	0.225853	0.21857	0.147793	0.152763	0.123007	0.131275	0.0976715	0.101909	0.0603874	0.06649	0.0535136	0.0561981	0.0273263	0.031598
106.8	0.22956	0.218586	0.157345	0.152797	0.127463	0.131328	0.0982043	0.101948	0.0660856	0.0665226	0.0522147	0.0562301	0.0304181	0.0316152
107	0.230081	0.218601	0.147438	0.152832	0.128402	0.131381	0.101626	0.101986	0.0672408	0.0665552	0.0505777	0.0562621	0.0282623	0.0316324
107.2	0.231041	0.218615	0.157002	0.152867	0.130184	0.131434	0.103623	0.102025	0.0659149	0.0665878	0.0582872	0.056294	0.0345565	0.0316495
107.4	0.225171	0.21863	0.151246	0.152901	0.124267	0.131487	0.100308	0.102063	0.061018	0.0666203	0.054409	0.0563258	0.027415	0.0316666
107.6	0.220071	0.218645	0.150997	0.152936	0.122164	0.13154	0.0972622	0.102102	0.0539796	0.0666527	0.0456887	0.0563577	0.0249806	0.0316838
107.8	0.227849	0.21866	0.155341	0.15297	0.122986	0.131593	0.100147	0.10214	0.0619912	0.0666852	0.0493271	0.0563895	0.034533	0.0317009
108	0.221471	0.218674	0.149456	0.153004	0.12338	0.131645	0.101043	0.102178	0.0614917	0.0667176	0.0464228	0.0564213	0.0306896	0.031718
108.2	0.229351	0.218689	0.151324	0.153038	0.127746	0.131698	0.105833	0.102216	0.0703831	0.0667499	0.0540066	0.056453	0.0346136	0.031735
108.4	0.225773	0.218703	0.153447	0.153072	0.125603	0.13175	0.10315	0.102255	0.0664617	0.0667822	0.0494958	0.0564848	0.0354673	0.0317521
108.6	0.232833	0.218717	0.152232	0.153106	0.12383	0.131802	0.105588	0.102293	0.065288	0.0668145	0.0541707	0.0565164	0.03185	0.0317691
108.8	0.232661	0.218732	0.152071	0.153139	0.128353	0.131855	0.103853	0.102331	0.0666822	0.0668468	0.05254	0.0565481	0.0296361	0.0317862
109	0.232036	0.218746	0.154435	0.153173	0.126253	0.131907	0.106076	0.102369	0.0622511	0.066879	0.0562074	0.0565797	0.0345118	0.0318032
109.2	0.228776	0.21876	0.154828	0.153206	0.126934	0.131959	0.0979434	0.102407	0.0635263	0.0669111	0.052299	0.0566113	0.0346856	0.0318202
109.4	0.2266	0.218774	0.150354	0.153239	0.127626	0.13201	0.0997662	0.102444	0.0633667	0.0669433	0.0540177	0.0566429	0.0306442	0.0318371
109.6	0.225748	0.218788	0.148071	0.153273	0.120579	0.132062	0.102126	0.102482	0.0599945	0.0669754	0.0426745	0.0566744	0.0268877	0.0318541
109.8	0.225529	0.218801	0.150039	0.153306	0.126019	0.132114	0.0987193	0.10252	0.0611779	0.0670074	0.0462	0.0567059	0.0271615	0.031871
110	0.220679	0.218815	0.144819	0.153339	0.118266	0.132165	0.0935839	0.102558	0.0589621	0.0670394	0.0451218	0.0567374	0.0293151	0.031888
110.2	0.226141	0.218829	0.157316	0.153371	0.13052	0.132217	0.102583	0.102595	0.0649654	0.0670714	0.0568001	0.0567688	0.0308931	0.0319049
110.4	0.237975	0.218842	0.161309	0.153404	0.132147	0.132268	0.107318	0.102633	0.0723376	0.0671033	0.0616475	0.0568002	0.0425184	0.0319218
110.6	0.224313	0.218856	0.149234	0.153437	0.122345	0.132319	0.0993893	0.10267	0.0630843	0.0671353	0.0521288	0.0568316	0.0274585	0.0319387
110.8	0.228766	0.218869	0.155636	0.153469	0.128565	0.13237	0.0975508	0.102708	0.067117	0.0671671	0.0513555	0.0568629	0.0317879	0.0319555
111	0.224949	0.218882	0.154581	0.153501	0.125786	0.132421	0.0997639	0.102745	0.0647545	0.0671989	0.0573238	0.0568942	0.0338912	0.0319724
111.2	0.229205	0.218895	0.152735	0.153534	0.128402	0.132472	0.10131	0.102783	0.0614437	0.0672307	0.049549	0.0569255	0.0288798	0.0319892
111.4	0.229373	0.218908	0.15081	0.153566	0.119061	0.132522	0.104201	0.10282	0.0608199	0.0672625	0.0537495	0.0569567	0.0286389	0.0320061
111.6	0.233633	0.218922	0.15314	0.153598	0.131551	0.132573	0.105939	0.102857	0.0663809	0.0672942	0.0573556	0.0569879	0.0339216	0.0320229
111.8	0.232566	0.218934	0.151584	0.15363	0.129458	0.132624	0.106415	0.102894	0.0643512	0.0673259	0.0479341	0.0570191	0.0317256	0.0320397
112	0.228179	0.218947	0.154146	0.153662	0.125329	0.132674	0.0949577	0.102931	0.0619455	0.0673575	0.051423	0.0570503	0.0280931	0.0320564
112.2	0.227518	0.21896	0.150947	0.153693	0.121863	0.132724	0.103104	0.102968	0.0623225	0.0673891	0.0511004	0.0570814	0.0253257	0.0320732
112.4	0.233063	0.218973	0.158185	0.153725	0.128316	0.132774	0.106299	0.103005	0.0665925	0.0674207	0.057231	0.0571125	0.031919	0.0320899
112.6	0.231676	0.218985	0.161341	0.153756	0.127964	0.132824	0.10587	0.103042	0.0714171	0.0674522	0.0607751	0.0571435	0.0309764	0.0321067
112.8	0.220996	0.218998	0.146978	0.153788	0.123909	0.132874	0.0985016	0.103079	0.0556828	0.0674837	0.0505998	0.0571745	0.0241599	0.0321234
113	0.23051	0.21901	0.151808	0.153819	0.124232	0.132924	0.0993006	0.103116	0.0632745	0.0675152	0.0526602	0.0572055	0.0294311	0.0321401
113.2	0.230337	0.219023	0.154675	0.15385	0.126102	0.132974	0.105582	0.103153	0.0688596	0.0675466	0.0535561	0.0572365	0.0332735	0.0321568
113.4	0.235557	0.219035	0.1527	0.153881	0.128861	0.133023	0.103449	0.10319	0.0654383	0.067578	0.0559912	0.0572674	0.0325828	0.0321734
113.6	0.234076	0.219047	0.15523	0.153912	0.127323	0.133073	0.100959	0.103226	0.0668976	0.0676093	0.0561759	0.0572983	0.0343806	0.0321901
113.8	0.228624	0.219059	0.147514	0.153943	0.119721	0.133122	0.100913	0.103263	0.0624609	0.0676407	0.0467922	0.0573292	0.0301015	0.0322067
114	0.227097	0.219072	0.149738	0.153973	0.122685	0.133172	0.101402	0.103299	0.0602177	0.0676719	0.0503749	0.05736	0.0302442	0.0322233
114.2	0.228391	0.219084	0.153001	0.154004	0.126235	0.133221	0.0996426	0.103336	0.0636266	0.0677032	0.051641	0.0573908	0.0321214	0.0322399
114.4	0.227003	0.219096	0.152823	0.154034	0.124572	0.13327	0.0994779	0.103372	0.0651631	0.0677344	0.0512482	0.0574216	0.031684	0.0322565
114.6	0.22708	0.219107	0.157934	0.154065	0.127481	0.133319	0.101034	0.103409	0.0659193	0.0677655	0.05269	0.0574524	0.0327641	0.0322731
114.8	0.233306	0.219119	0.153909	0.154095	0.132761	0.133368	0.104365	0.103445	0.0678786	0.0677967	0.0532393	0.0574831	0.031579	0.0322897
115	0.23024	0.219131	0.154772	0.154125	0.122222	0.133416	0.101013	0.103481	0.0660852	0.0678277	0.0547052	0.0575138	0.0298352	0.0323062
115.2	0.234194	0.219142	0.152644	0.154155	0.131032	0.133465	0.103117	0.103518	0.0688482	0.0678588	0.056127	0.0575444	0.0380672	0.0323227
115.4	0.229099	0.219154	0.151105	0.154185	0.128249	0.133514	0.101041	0.103554	0.0629262	0.0678898	0.0549303	0.057575	0.030394	0.0323393
115.6	0.238357	0.219166	0.151487	0.154215	0.128043	0.133562	0.103207	0.10359	0.0613248	0.0679208	0.0563473	0.0576056	0.0340067	0.0323558
115.8	0.22746	0.219177	0.154653	0.154245	0.129284	0.13361	0.10025	0.103626	0.0634764	0.0679517	0.0542854	0.0576362	0.0307297	0.0323722
116	0.232443	0.219188	0.154823	0.154274	0.130028	0.133659	0.102185	0.103662	0.0667481	0.0679826	0.0543876	0.0576667	0.0311238	0.0323887
116.2	0.229935	0.2192	0.152035	0.154304	0.128453	0.133707	0.104087	0.103698	0.0626009	0.0680135	0.0508914	0.0576972	0.0285187	0.0324052
116.4	0.227719	0.219211	0.149969	0.154333	0.129438	0.133755	0.100792	0.103734	0.0648547	0.0680443	0.0513941	0.0577277	0.0303686	0.0324216
116.6	0.229639	0.219222	0.147022	0.154362	0.126375	0.133803	0.103695	0.10377	0.0576481	0.0680751	0.0554541	0.0577581	0.0362767	0.032438
116.8	0.227892	0.219233	0.155308	0.154392	0.12739	0.13385	0.104718	0.103806	0.0607122	0.0681059	0.0564895	0.0577885	0.0318877	0.0324544
117	0.228226	0.219244	0.150114	0.154421	0.123876	0.133898	0.100624	0.103841	0.061935	0.0681366	0.047789	0.0578189	0.0283828	0.0324708
117.2	0.228029	0.219255	0.146622	0.15445	0.125343	0.133946	0.099043	0.103877	0.0632661	0.0681673	0.0493622	0.0578492	0.0299653	0.0324872
117.4	0.231136	0.219266	0.152866	0.154479	0.128794	0.133993	0.100721	0.103913	0.0648888	0.068198	0.0549703	0.0578795	0.0297818	0.0325036
117.6	0.233713	0.219277	0.15289	0.154507	0.128992	0.13404	0.0991683	0.103948	0.0634566	0.0682286	0.0548419	0.0579098	0.0356144	0.0325199
117.8	0.226077	0.219287	0.147617	0.154536	0.122913	0.134088	0.101687	0.103984	0.0624288	0.0682592	0.0492527	0.0579401	0.0294624	0.0325362
118	0.233373	0.219298	0.15282	0.154565	0.131447	0.134135	0.104887	0.104019	0.0668587	0.0682897	0.0502422	0.0579703	0.0322111	0.0325526
118.2	0.239853	0.219309	0.160715	0.154593	0.127357	0.134182	0.105609	0.104055	0.0687037	0.0683202	0.0577179	0.0580005	0.038309	0.0325689
118.4	0.231721	0.219319	0.152429	0.154622	0.123136	0.134229	0.103448	0.10409	0.0653366	0.0683507	0.0555632	0.0580306	0.0300575	0.0325852
118.6	0.233676	0.21933	0.15262	0.15465	0.125835	0.134276	0.103043	0.104125	0.0623985	0.0683812	0.0512195	0.0580608	0.0354108	0.0326014
118.8	0.231283	0.21934	0.158392	0.154678	0.129343	0.134323	0.104048	0.104161	0.067603	0.0684116	0.0571253	0.0580909	0.03456	0.0326177
119	0.2305	0.21935	0.155267	0.154706	0.122626	0.134369	0.10566	0.104196	0.0681279	0.0684419	0.0549161	0.0581209	0.0320735	0.0326339
119.2	0.233019	0.219361	0.15806	0.154734	0.131123	0.134416	0.105046	0.104231	0.0666765	0.0684723	0.0524311	0.058151	0.0357063	0.0326502
119.4	0.230552	0.219371	0.153723	0.154762	0.127053	0.134462	0.100383	0.104266	0.0627988	0.0685026	0.0508896	0.058181	0.0308636	0.0326664
119.6	0.238258	0.219381	0.164199	0.15479	0.131158	0.134509	0.106709	0.104301	0.0715222	0.0685328	0.0590835	0.058211	0.033371	0.0326826
119.8	0.230037	0.219391	0.150639	0.154817	0.126949	0.134555	0.100035	0.104336	0.06486	0.068563	0.0505286	0.0582409	0.0282519	0.0326987
120.004	0.230037	0.219401	0.150639	0.154846	0.126949	0.134602	0.100035	0.104372	0.06486	0.0685938	0.0505286	0.0582714	0.0282519	0.0327152
120.204	0.228356	0.216282	0.150752	0.152849	0.132221	0.13301	0.10395	0.102941	0.065822	0.0677276	0.0553744	0.0575796	0.0351194	0.0323099
120.404	0.215302	0.213224	0.149672	0.150892	0.131413	0.131448	0.0979991	0.101538	0.0640049	0.0668781	0.0563661	0.0569011	0.0311905	0.0319125
120.604	0.203022	0.210226	0.136886	0.148972	0.125143	0.129917	0.0925326	0.100163	0.0650235	0.0660453	0.0525156	0.0562357	0.0351329	0.0315228
120.804	0.190897	0.207287	0.136313	0.14709	0.117408	0.128415	0.086604	0.0988146	0.0622124	0.0652286	0.0485989	0.0555833	0.0307645	0.0311406
121.004	0.190648	0.204405	0.132485	0.145245	0.118272	0.126943	0.0918863	0.0974925	0.0625202	0.0644278	0.0496044	0.0549435	0.0345717	0.0307659
121.204	0.18119	0.20158	0.130453	0.143436	0.121344	0.125498	0.0828391	0.0961964	0.0588151	0.0636425	0.0518388	0.054316	0.0335732	0.0303984
121.404	0.180928	0.19881	0.129223	0.141661	0.117471	0.124082	0.0851126	0.0949255	0.0607244	0.0628725	0.0480782	0.0537007	0.0324653	0.0300381
121.604	0.173724	0.196095	0.124325	0.139922	0.112233	0.122693	0.0810615	0.0936795	0.0657826	0.0621175	0.0509309	0.0530973	0.0296936	0.0296848
121.804	0.171169	0.193433	0.122553	0.138216	0.108919	0.121331	0.082872	0.0924578	0.0578528	0.0613771	0.0463021	0.0525055	0.0249758	0.0293383
122.004	0.170031	0.190822	0.124279	0.136543	0.108094	0.119996	0.0868737	0.09126	0.0606805	0.0606511	0.0476847	0.0519252	0.0298309	0.0289985
122.204	0.164101	0.188263	0.123232	0.134903	0.104146	0.118686	0.0829236	0.0900855	0.0540769	0.0599391	0.0436181	0.051356	0.0298919	0.0286653
122.404	0.163289	0.185754	0.119951	0.133294	0.110691	0.117401	0.0796075	0.0889339	0.0564211	0.059241	0.0491705	0.0507978	0.0305351	0.0283385
122.604	0.157846	0.183293	0.117142	0.131717	0.104928	0.116141	0.0772783	0.0878048	0.051827	0.0585563	0.0425188	0.0502504	0.024993	0.0280181
122.804	0.157871	0.180881	0.118642	0.13017	0.102399	0.114905	0.0781935	0.0866976	0.0523023	0.0578849	0.0473003	0.0497134	0.0288213	0.0277038
123.004	0.153671	0.178516	0.111913	0.128653	0.101282	0.113693	0.0784866	0.085612	0.0549679	0.0572265	0.0446784	0.0491869	0.0284539	0.0273956
123.204	0.151761	0.176197	0.108127	0.127166	0.104643	0.112504	0.0753622	0.0845476	0.0509952	0.0565808	0.0431194	0.0486704	0.0287208	0.0270934
123.404	0.153371	0.173924	0.112498	0.125707	0.102627	0.111338	0.0765214	0.0835038	0.0529111	0.0559476	0.0498745	0.0481638	0.0223242	0.026797
123.604	0.152496	0.171694	0.112519	0.124277	0.101573	0.110195	0.0745613	0.0824803	0.0515928	0.0553266	0.0495397	0.047667	0.0246221	0.0265062
123.804	0.148436	0.169509	0.113201	0.122874	0.102954	0.109073	0.073301	0.0814767	0.0517573	0.0547176	0.047113	0.0471797	0.0261244	0.0262211
124.004	0.147233	0.167365	0.104965	0.121499	0.0951438	0.107973	0.0718357	0.0804927	0.0497736	0.0541203	0.0461159	0.0467018	0.0224168	0.0259415
124.204	0.142456	0.165264	0.108101	0.12015	0.0958963	0.106894	0.0730313	0.0795277	0.0490407	0.0535346	0.0465821	0.046233	0.0279989	0.0256673
124.404	0.14326	0.163203	0.10374	0.118827	0.0937259	0.105835	0.072188	0.0785814	0.0525679	0.0529601	0.0437492	0.0457731	0.0302141	0.0253983
124.604	0.138473	0.161183	0.101505	0.117529	0.0977747	0.104797	0.0702747	0.0776535	0.0522951	0.0523966	0.04509	0.0453221	0.0258041	0.0251345
124.804	0.140824	0.159201	0.100979	0.116256	0.0973819	0.103779	0.0695894	0.0767436	0.050084	0.051844	0.0417167	0.0448796	0.0275233	0.0248757
125.004	0.132889	0.157259	0.100784	0.115008	0.088728	0.10278	0.0725669	0.0758513	0.0495284	0.051302	0.0426022	0.0444456	0.0219414	0.0246219
125.204	0.135016	0.155354	0.101784	0.113784	0.0936726	0.1018	0.0673097	0.0749762	0.0517841	0.0507704	0.0409827	0.0440199	0.0294164	0.024373
125.404	0.132774	0.153486	0.101591	0.112584	0.0952557	0.100838	0.0714251	0.0741181	0.0491816	0.050249	0.0414636	0.0436023	0.027416	0.0241289
125.604	0.133381	0.151654	0.0970948	0.111406	0.0917445	0.0998954	0.0701411	0.0732766	0.0463462	0.0497377	0.0392566	0.0431926	0.0241989	0.0238894
125.804	0.131701	0.149858	0.0965307	0.110252	0.0913524	0.0989703	0.0715307	0.0724514	0.0476381	0.0492361	0.0368291	0.0427908	0.0239336	0.0236544
126.004	0.126728	0.148096	0.0986071	0.109119	0.0860631	0.0980628	0.0689199	0.0716421	0.0434563	0.0487441	0.0407756	0.0423965	0.0229449	0.023424
126.204	0.12386	0.146369	0.0920024	0.108008	0.0823722	0.0971725	0.0614274	0.0708484	0.038271	0.0482615	0.0353805	0.0420098	0.0182599	0.023198
126.404	0.128206	0.144675	0.0996246	0.106918	0.0946168	0.0962991	0.0656153	0.07007	0.0511034	0.0477881	0.042019	0.0416304	0.0254859	0.0229763
126.604	0.123242	0.143014	0.0959806	0.105849	0.0904974	0.0954422	0.0692156	0.0693066	0.0478816	0.0473238	0.0412901	0.0412581	0.0223284	0.0227588
126.804	0.129968	0.141385	0.0978722	0.104801	0.0910455	0.0946016	0.0687132	0.0685579	0.0459121	0.0468683	0.039594	0.040893	0.0210739	0.0225454
127.004	0.126021	0.139788	0.0956343	0.103773	0.0883352	0.0937768	0.0720373	0.0678237	0.0478881	0.0464215	0.0409947	0.0405347	0.0215786	0.0223361
127.204	0.130496	0.138221	0.0938502	0.102764	0.0885577	0.0929676	0.0654112	0.0671035	0.0464223	0.0459832	0.0444562	0.0401832	0.0276606	0.0221308
127.404	0.120103	0.136685	0.0925575	0.101774	0.0863571	0.0921736	0.06024	0.0663972	0.0406529	0.0455532	0.0398372	0.0398383	0.0166784	0.0219293
127.604	0.121386	0.135178	0.0965858	0.100804	0.0874784	0.0913946	0.0611468	0.0657045	0.043293	0.0451315	0.0363716	0.0394999	0.0248057	0.0217317
127.804	0.120301	0.1337	0.0948037	0.0998515	0.0883465	0.0906303	0.0673952	0.065025	0.0479378	0.0447177	0.0442582	0.0391679	0.0288802	0.0215379
128.004	0.123655	0.132251	0.0956391	0.0989175	0.0889454	0.0898803	0.0677387	0.0643586	0.0502037	0.0443118	0.0421702	0.0388421	0.0278936	0.0213477
128.204	0.122259	0.13083	0.0911429	0.0980012	0.0849595	0.0891445	0.0651492	0.063705	0.0472893	0.0439136	0.0359839	0.0385225	0.0227126	0.0211611
128.404	0.123963	0.129436	0.0887183	0.0971024	0.0848275	0.0884224	0.0627404	0.0630639	0.042752	0.0435229	0.0350258	0.0382089	0.0228788	0.020978
128.604	0.114021	0.128069	0.0884286	0.0962205	0.0789178	0.0877138	0.0612237	0.062435	0.0458108	0.0431396	0.0371312	0.0379011	0.0238975	0.0207983
128.804	0.117564	0.126728	0.0906091	0.0953554	0.0828747	0.0870185	0.0648188	0.0618182	0.0450188	0.0427636	0.0395583	0.0375991	0.0238355	0.0206221
129.004	0.111714	0.125413	0.0876907	0.0945067	0.0835557	0.0863362	0.0611469	0.0612132	0.0388783	0.0423946	0.0406379	0.0373027	0.0250576	0.0204492
129.204	0.112007	0.124123	0.0861946	0.093674	0.0807674	0.0856666	0.0607296	0.0606197	0.0405312	0.0420326	0.0361859	0.0370119	0.0262506	0.0202795
129.404	0.114322	0.122858	0.091995	0.0928571	0.0803255	0.0850096	0.0607836	0.0600375	0.0471207	0.0416774	0.0404721	0.0367265	0.0258477	0.020113
129.604	0.116972	0.121617	0.0939131	0.0920556	0.08284	0.0843647	0.0600334	0.0594664	0.0466774	0.041329	0.0403538	0.0364464	0.0229653	0.0199496
129.804	0.114787	0.1204	0.0895456	0.0912692	0.0815523	0.0837318	0.0637819	0.0589062	0.0429932	0.040987	0.0399011	0.0361715	0.0260943	0.0197893
130.004	0.110781	0.119206	0.0902815	0.0904976	0.0759099	0.0831107	0.0634379	0.0583567	0.043404	0.0406515	0.0419438	0.0359018	0.0203658	0.019632
130.204	0.104458	0.118035	0.0870554	0.0897406	0.0760591	0.0825011	0.0549275	0.0578176	0.0402686	0.0403223	0.031901	0.035637	0.0227084	0.0194777
130.404	0.111955	0.116886	0.0836656	0.0889977	0.0826098	0.0819028	0.051246	0.0572887	0.0390471	0.0399992	0.0357339	0.0353772	0.0187267	0.0193262
130.604	0.107415	0.115759	0.0843727	0.0882689	0.0768176	0.0813155	0.0568106	0.0567698	0.0397662	0.0396822	0.0335451	0.0351221	0.0215412	0.0191775
130.804	0.111947	0.114654	0.085158	0.0875537	0.0775084	0.0807391	0.0567773	0.0562608	0.0409488	0.0393711	0.034007	0.0348718	0.0236707	0.0190317
131.004	0.109307	0.113569	0.0875596	0.0868518	0.0783732	0.0801734	0.0561212	0.0557615	0.0397737	0.0390658	0.04006	0.0346261	0.0197031	0.0188885
131.204	0.110603	0.112506	0.0811023	0.0861632	0.0812586	0.079618	0.0555368	0.0552715	0.0430305	0.0387662	0.0367999	0.0343849	0.021162	0.018748
131.404	0.109695	0.111462	0.0832167	0.0854874	0.0749204	0.0790729	0.0600583	0.0547909	0.044276	0.0384722	0.03464	0.0341481	0.0209267	0.0186101
131.604	0.107915	0.110439	0.0844879	0.0848242	0.0784853	0.0785377	0.0540475	0.0543193	0.0410828	0.0381837	0.0338038	0.0339157	0.0231203	0.0184747
131.804	0.110281	0.109435	0.0820128	0.0841733	0.0765208	0.0780124	0.0534498	0.0538566	0.0364874	0.0379005	0.0326655	0.0336876	0.0197728	0.0183419
132.004	0.106255	0.108449	0.0829983	0.0835346	0.0787618	0.0774966	0.0585923	0.0534026	0.0383241	0.0376225	0.036179	0.0334636	0.0243788	0.0182115
132.204	0.10211	0.107483	0.0855665	0.0829078	0.0714612	0.0769903	0.0546903	0.0529571	0.0396851	0.0373498	0.0355087	0.0332438	0.0178045	0.0180835
132.404	0.104946	0.106535	0.0788463	0.0822926	0.0764623	0.0764933	0.0519334	0.05252	0.0412137	0.037082	0.0360896	0.0330279	0.0227766	0.0179578
132.604	0.103463	0.105604	0.0795828	0.0816888	0.081657	0.0760052	0.0568667	0.0520912	0.0410701	0.0368192	0.0343746	0.032816	0.0227401	0.0178345
132.804	0.102719	0.104692	0.0755075	0.0810962	0.0765243	0.0755261	0.0519103	0.0516703	0.038162	0.0365612	0.0323173	0.0326079	0.0165655	0.0177134
133.004	0.105784	0.103796	0.0844615	0.0805145	0.0737216	0.0750556	0.0549778	0.0512574	0.0414638	0.036308	0.0364812	0.0324036	0.0180854	0.0175946
133.204	0.103488	0.102918	0.0789813	0.0799436	0.0728122	0.0745937	0.0489816	0.0508521	0.0418803	0.0360595	0.0310304	0.032203	0.0211354	0.0174779
133.404	0.102471	0.102056	0.0843974	0.0793832	0.0780482	0.0741401	0.0547635	0.0504545	0.0397646	0.0358155	0.0393058	0.0320061	0.0241953	0.0173634
133.604	0.101606	0.10121	0.0802758	0.0788331	0.0725702	0.0736947	0.0571746	0.0500642	0.0379949	0.0355759	0.0356093	0.0318127	0.0249613	0.017251
133.804	0.10547	0.10038	0.0797955	0.0782932	0.0725632	0.0732573	0.05111	0.0496813	0.0429013	0.0353408	0.0344921	0.0316228	0.0214567	0.0171406
134.004	0.10199	0.0995652	0.0809089	0.0777631	0.0702634	0.0728278	0.0545491	0.0493054	0.0390559	0.03511	0.0352771	0.0314363	0.0226845	0.0170322
134.204	0.0979551	0.0987661	0.0796228	0.0772428	0.0747021	0.072406	0.0515214	0.0489366	0.0392911	0.0348833	0.0319305	0.0312531	0.020798	0.0169258
134.404	0.10327	0.0979818	0.0793946	0.076732	0.071145	0.0719918	0.0507826	0.0485746	0.0354441	0.0346608	0.0334588	0.0310733	0.0193467	0.0168213
134.604	0.103017	0.0972123	0.0787066	0.0762305	0.0784696	0.0715849	0.056913	0.0482193	0.0442097	0.0344424	0.0346727	0.0308966	0.0229941	0.0167187
134.804	0.0964409	0.0964571	0.0815033	0.0757382	0.0781133	0.0711853	0.0488143	0.0478706	0.0396949	0.0342278	0.0310824	0.0307232	0.0212087	0.0166179
135.004	0.0991523	0.095716	0.0740057	0.0752548	0.0688354	0.0707928	0.0474025	0.0475283	0.0334246	0.0340172	0.0341914	0.0305528	0.0202514	0.016519
135.204	0.0953776	0.0949887	0.0779598	0.0747802	0.0753485	0.0704073	0.0532823	0.0471923	0.0404742	0.0338104	0.033761	0.0303854	0.0178079	0.0164218
135.404	0.0984182	0.0942749	0.0800421	0.0743143	0.072645	0.0700287	0.0501731	0.0468626	0.0364995	0.0336073	0.0353446	0.030221	0.0181917	0.0163264
135.604	0.100713	0.0935744	0.0790374	0.0738567	0.0709236	0.0696567	0.0573889	0.0465389	0.0398831	0.0334079	0.0376179	0.0300595	0.0182985	0.0162327
135.804	0.0935014	0.0928868	0.0667529	0.0734075	0.0673228	0.0692913	0.0492871	0.0462211	0.0360211	0.0332121	0.0268416	0.0299009	0.0153253	0.0161407
136.004	0.0950645	0.092212	0.0741278	0.0729663	0.0712829	0.0689323	0.0444461	0.0459092	0.0378692	0.0330198	0.0294104	0.029745	0.016585	0.0160503
136.204	0.0898809	0.0915497	0.0689446	0.0725331	0.0682066	0.0685797	0.046249	0.045603	0.0298549	0.0328309	0.0263718	0.0295919	0.0130915	0.0159616
136.404	0.0985219	0.0908996	0.0778564	0.0721077	0.0703853	0.0682332	0.0553899	0.0453024	0.0416364	0.0326454	0.0382617	0.0294415	0.0241555	0.0158744
136.604	0.0963456	0.0902615	0.0789317	0.0716899	0.0728755	0.0678927	0.0492933	0.0450073	0.0360767	0.0324632	0.0342075	0.0292938	0.0213805	0.0157887
136.804	0.0945918	0.0896351	0.0794221	0.0712796	0.0725967	0.0675583	0.054927	0.0447175	0.0395834	0.0322843	0.0342271	0.0291486	0.0191834	0.0157046
137.004	0.0914653	0.0890203	0.0768159	0.0708767	0.0669999	0.0672296	0.0471813	0.0444331	0.0320911	0.0321085	0.0291734	0.0290059	0.0182826	0.0156219
137.204	0.0956429	0.0884168	0.0746051	0.0704809	0.0745649	0.0669066	0.0503312	0.0441538	0.0394795	0.0319358	0.0372192	0.0288657	0.0249297	0.0155407
137.404	0.0897767	0.0878243	0.0724906	0.0700922	0.0681662	0.0665893	0.0495347	0.0438795	0.0366277	0.0317662	0.0351917	0.028728	0.0174377	0.015461
137.604	0.0944033	0.0872426	0.0712151	0.0697103	0.0660272	0.0662774	0.0488456	0.0436103	0.0333621	0.0315996	0.0318474	0.0285926	0.0189766	0.0153826
137.804	0.0861942	0.0866716	0.0701648	0.0693353	0.0631814	0.0659709	0.0447497	0.0433459	0.035862	0.031436	0.0293688	0.0284595	0.0162462	0.0153056
138.004	0.0850984	0.086111	0.0717178	0.0689669	0.0633981	0.0656696	0.0486424	0.0430863	0.0380897	0.0312752	0.0290032	0.0283288	0.0174823	0.01523
138.204	0.0919954	0.0855606	0.0697556	0.068605	0.0647841	0.0653735	0.0432385	0.0428313	0.0337625	0.0311172	0.0270043	0.0282003	0.0159466	0.0151556
138.404	0.0906022	0.0850203	0.0746484	0.0682494	0.0716231	0.0650825	0.0523227	0.0425809	0.0387474	0.030962	0.0335056	0.028074	0.0209285	0.0150826
138.604	0.0881188	0.0844897	0.0684465	0.0679001	0.0644807	0.0647964	0.0444028	0.042335	0.0365455	0.0308095	0.0307944	0.0279498	0.0187359	0.0150108
138.804	0.0836005	0.0839687	0.0678112	0.0675569	0.0675584	0.0645152	0.047967	0.0420936	0.0356652	0.0306596	0.0312314	0.0278278	0.0191641	0.0149403
139.004	0.0887947	0.0834572	0.069083	0.0672198	0.0643661	0.0642388	0.0453054	0.0418564	0.0384095	0.0305124	0.028843	0.0277078	0.0150899	0.014871
139.204	0.0897115	0.0829549	0.0707152	0.0668885	0.0691888	0.063967	0.0520564	0.0416235	0.038671	0.0303677	0.0317319	0.0275899	0.0168289	0.0148029
139.404	0.0927192	0.0824616	0.0715409	0.066563	0.0759024	0.0636998	0.052908	0.0413947	0.0343595	0.0302255	0.0348344	0.0274739	0.022957	0.0147359
139.604	0.0936779	0.0819773	0.07121	0.0662431	0.0693664	0.0634371	0.045631	0.0411699	0.04178	0.0300857	0.0329655	0.0273599	0.0192397	0.0146701
139.804	0.0876859	0.0815016	0.0744514	0.0659287	0.066959	0.0631788	0.0487626	0.0409492	0.0361449	0.0299483	0.0322503	0.0272478	0.021994	0.0146054
140.004	0.0923408	0.0810344	0.0754561	0.0656198	0.0701084	0.0629248	0.0568422	0.0407323	0.0418341	0.0298133	0.0337702	0.0271376	0.022878	0.0145418
140.204	0.0881838	0.0805756	0.0648594	0.0653163	0.0666651	0.0626751	0.0497134	0.0405193	0.0357832	0.0296807	0.0337616	0.0270293	0.0209618	0.0144793
140.404	0.0819931	0.080125	0.0697011	0.0650179	0.0627398	0.0624294	0.0453887	0.04031	0.0362309	0.0295502	0.0311528	0.0269227	0.0177767	0.0144178
140.604	0.0890497	0.0796824	0.071349	0.0647246	0.0670017	0.0621879	0.0505713	0.0401045	0.0397739	0.029422	0.0320361	0.0268179	0.0214497	0.0143574
140.804	0.0857815	0.0792476	0.0679618	0.0644364	0.0653528	0.0619503	0.0465234	0.0399025	0.0348285	0.029296	0.0275073	0.0267148	0.0171644	0.014298
141.004	0.0885204	0.0788206	0.0726434	0.0641531	0.0695956	0.0617166	0.0443809	0.039704	0.0410259	0.029172	0.0348361	0.0266134	0.01779	0.0142396
141.204	0.0789441	0.0784011	0.0653061	0.0638746	0.0653365	0.0614867	0.0367527	0.039509	0.0331923	0.0290502	0.0285219	0.0265137	0.0126362	0.0141822
141.404	0.0850318	0.0779891	0.0680051	0.0636008	0.0661511	0.0612606	0.048074	0.0393174	0.0340547	0.0289304	0.0293933	0.0264156	0.0154314	0.0141257
141.604	0.0827812	0.0775842	0.0680943	0.0633316	0.0583944	0.0610382	0.0412533	0.0391291	0.0305107	0.0288127	0.0265844	0.0263191	0.0132282	0.0140701
141.804	0.0885328	0.0771865	0.0687013	0.063067	0.0669845	0.0608194	0.0451781	0.038944	0.0327651	0.0286969	0.0351827	0.0262241	0.0197491	0.0140155
142.004	0.0835313	0.0767958	0.065658	0.0628068	0.0617511	0.060604	0.0476101	0.0387622	0.0329744	0.028583	0.0289879	0.0261307	0.0184963	0.0139618
142.204	0.0850125	0.0764119	0.0715829	0.0625509	0.06319	0.0603922	0.0468661	0.0385835	0.0325322	0.028471	0.032912	0.0260388	0.0215347	0.013909
142.404	0.0841845	0.0760348	0.0679184	0.0622994	0.0611179	0.0601838	0.044976	0.0384079	0.0345963	0.0283608	0.0277299	0.0259484	0.0150284	0.013857
142.604	0.0809585	0.0756641	0.0634959	0.062052	0.0625223	0.0599786	0.0434695	0.0382352	0.0306976	0.0282525	0.0250209	0.0258594	0.0139676	0.0138059
142.804	0.091653	0.0753	0.0728549	0.0618087	0.0692992	0.0597768	0.0495427	0.0380656	0.0420635	0.028146	0.0323923	0.0257719	0.0220663	0.0137556
143.004	0.0791157	0.0749421	0.0626514	0.0615695	0.0587606	0.0595781	0.0382895	0.0378988	0.0298526	0.0280411	0.0298563	0.0256857	0.0117531	0.0137061
143.204	0.0854568	0.0745904	0.0741336	0.0613342	0.0681724	0.0593825	0.0488663	0.0377348	0.0380457	0.0279381	0.034496	0.0256009	0.0218933	0.0136574
143.404	0.0839978	0.0742448	0.0656249	0.0611027	0.0625348	0.0591901	0.0410856	0.0375736	0.0312792	0.0278366	0.0302384	0.0255174	0.0183331	0.0136095
143.604	0.0845084	0.0739051	0.0665549	0.0608751	0.0602602	0.0590006	0.0394045	0.0374152	0.0313673	0.0277368	0.0326165	0.0254352	0.0172109	0.0135624
143.804	0.0764164	0.0735712	0.0650963	0.0606511	0.0603553	0.0588141	0.0439418	0.0372594	0.0309045	0.0276387	0.0298634	0.0253544	0.0183299	0.013516
144.004	0.0751964	0.0732431	0.0652301	0.0604308	0.0573027	0.0586305	0.0411122	0.0371062	0.0293887	0.0275421	0.0229908	0.0252747	0.0164282	0.0134704
[truncated: 1,679 more rows]

## Sheet: Fig. 5B
Apa Protection of MDH aggregation
Apa/MDH monomer ratio			0.11	0.21	0.32	0.52	5.21
[truncated: 202 more rows]

## Sheet: Fig. S1
Apa chromatograms			20S CP chromatogram
[truncated: 547 more rows]

[truncated: 4 more sheets: Fig. S10, Fig. S13, Figure S14 Left, Figure S14 Right]
