# Supplementary material
Source: Research Square preprint supplement (doi:10.21203/rs.3.rs-9902018/v1)
Supplement: Supplementary file 1 [file a4829e01c578e75b5c093412.pdf]

## SUPPLEMENTARY INFORMATION

# **Structural analysis of a heptameric ATP-independent proteasome activator reveals a novel mechanism for 20S proteasome binding and activation.**

Laura Mariño Puertas<sup>1#†</sup>, Federico Musso<sup>1#</sup>, Céline Brochier-Armanet<sup>2</sup>, Frank Gabel<sup>1†</sup>, Florian Chenavier<sup>1 †</sup>, Didier Flament<sup>4</sup>, Felix Weis<sup>1</sup>, Eric Girard<sup>1</sup>, Guy Schoehn<sup>1</sup> & Bruno Franzetti<sup>1\*</sup>

<sup>1</sup>Institut de Biologie Structurale, Univ. Grenoble Alpes, CNRS, CEA, IBS, F-38000 Grenoble.

<sup>2</sup>Laboratoire de Biométrie et Biologie Évolutive, Université Lyon 1, Lyon, France.

<sup>3</sup>Laboratoire de Microbiologie des Environnements Extrêmes, Ifremer-CNRS-Université de Bretagne Occidentale, Brest, France.

#These authors contributed equally.

†Present address: LMP: Molecular Biology Institute of Barcelona, IBMB-CSIC, Barcelona, Spain.

FG: Institut Laue-Langevin, Grenoble, France. FC: Chromatin Structure & Mobile DNA Laboratory, The Francis Crick Institute, London, UK

\*Corresponding author. Email: [bruno.franzetti@ibs.fr](mailto:bruno.franzetti@ibs.fr)

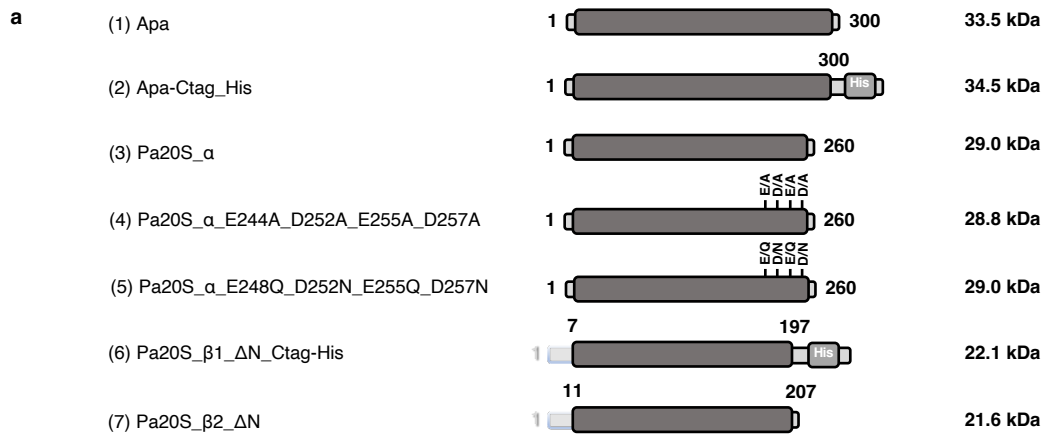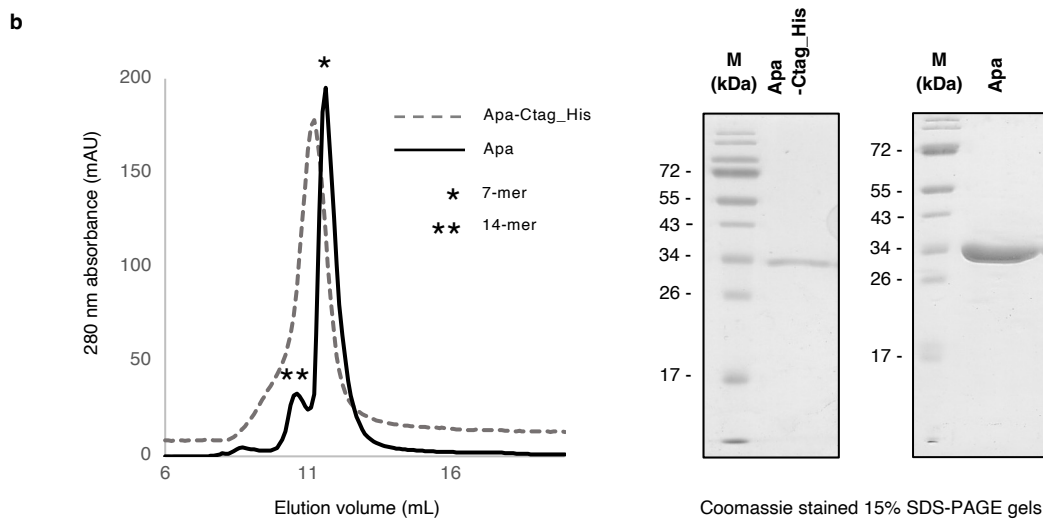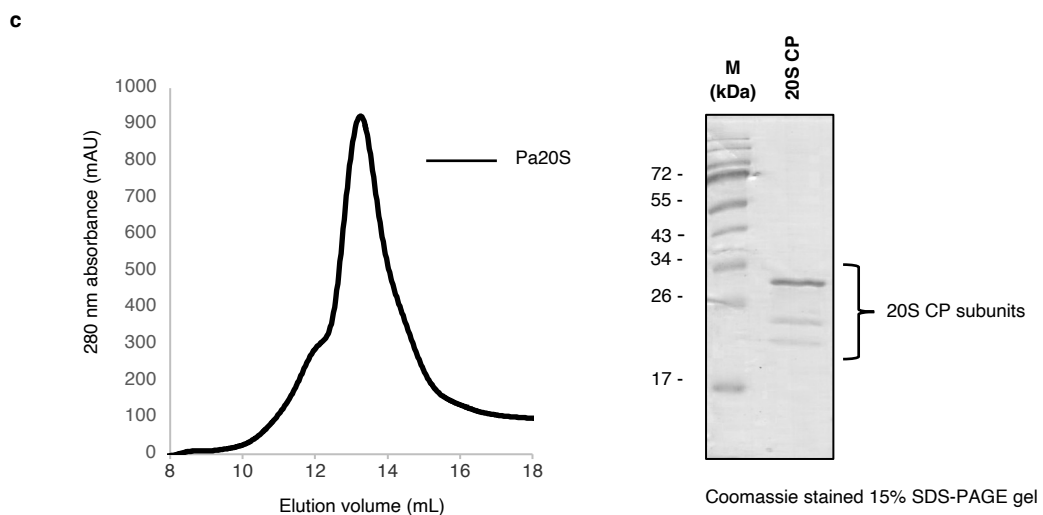

**Supplementary Figure 1: Overview of the recombinant proteins studied.**

**a**, Schematic diagram of Apa constructs and of 20S CP subunits used for the *in vitro* assembly of the *P. abyssi* 20S CP in *E. coli*. The construct (1) is the untagged full-length Apa protein, the construct (2) was modified with the addition of a 6x-Histidine tag at the C-terminal end. The construct (6) is the mature β1 20S CP subunit truncated for its 6 first amino acids, where the original Gly<sup>6</sup> was replaced by Met. In this construct a 6xHistidine tag was added at the C-terminal end. The construct (7) corresponds to the mature β2 20S CP subunit truncated for its 10 first amino acids, where the original Gly<sup>10</sup> was also replaced by Met. **b**, Left: size exclusion chromatography profile of Apa recombinant variants eluted from a Superdex 200 10/300 column (GE Healthcare). The 14-mer form tended to evolve into the 7-mer species while the low molecular weight peak remained stable in 7-mer. The 7-mer species (estimated molecular weight of 234.5 kDa) was used for further characterization. Right: SDS-PAGE gels of purified Apa recombinant proteins stained by Coomassie Blue. **c**, Left: size exclusion chromatography profile of the 20S CP eluted from a Superose 6 10/300 column (GE Healthcare) on the left panel; the shoulder corresponds to aggregate forms. Right: SDS-PAGE gel of purified and assembled 20S CP stained by Coomassie blue.

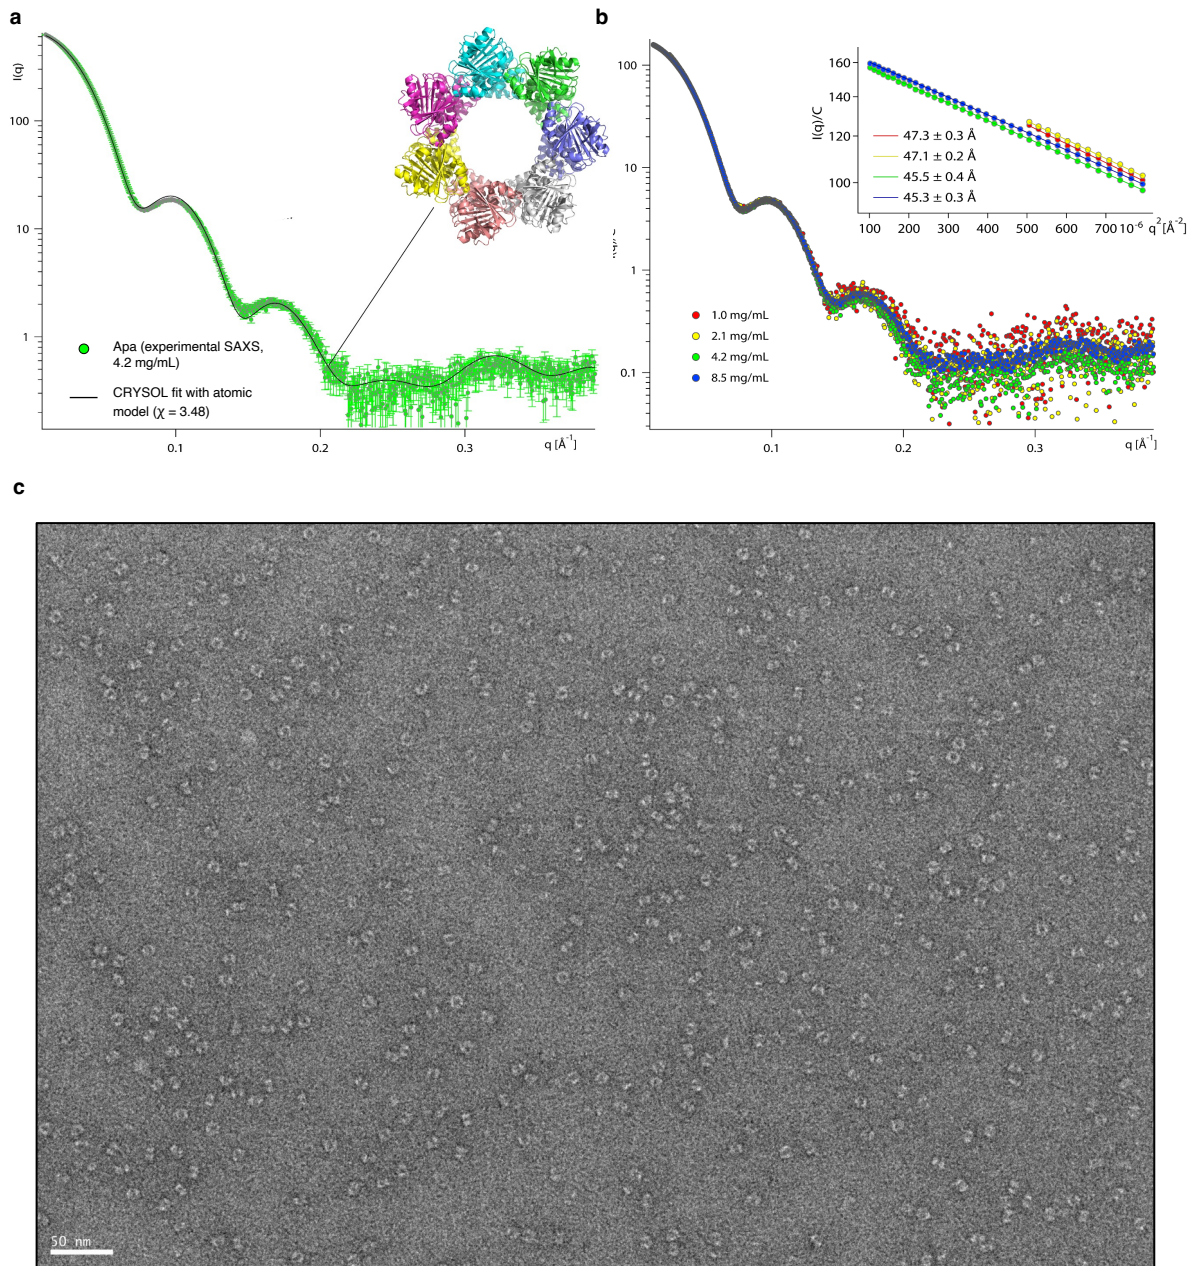

**Supplementary Figure 2: SAXS and negative staining TEM characterisation of Apa.**

**a**, CRYSOLOG fits of the Apa X-ray atomic model with the experimental SAXS data at 4.2 mg/mL (no background adjustment applied). The numerical value of  $\chi$ , as well as a visual inspection, confirm the oligomeric state of the atomic model and the conformations and arrangements of the individual subunits. **b**, Experimental Apa SAXS data at four different concentrations, normalized by concentration. *Inset:* Guinier fits and radii of gyration from the four data sets. The smallest  $q$ -values from the two lowest concentrations have been cut off, since aggregation was present in these two datasets. **c**, Negative staining micrograph of the untagged form of Apa stained with sodium silicotungstate at 30000X magnification.

**a**

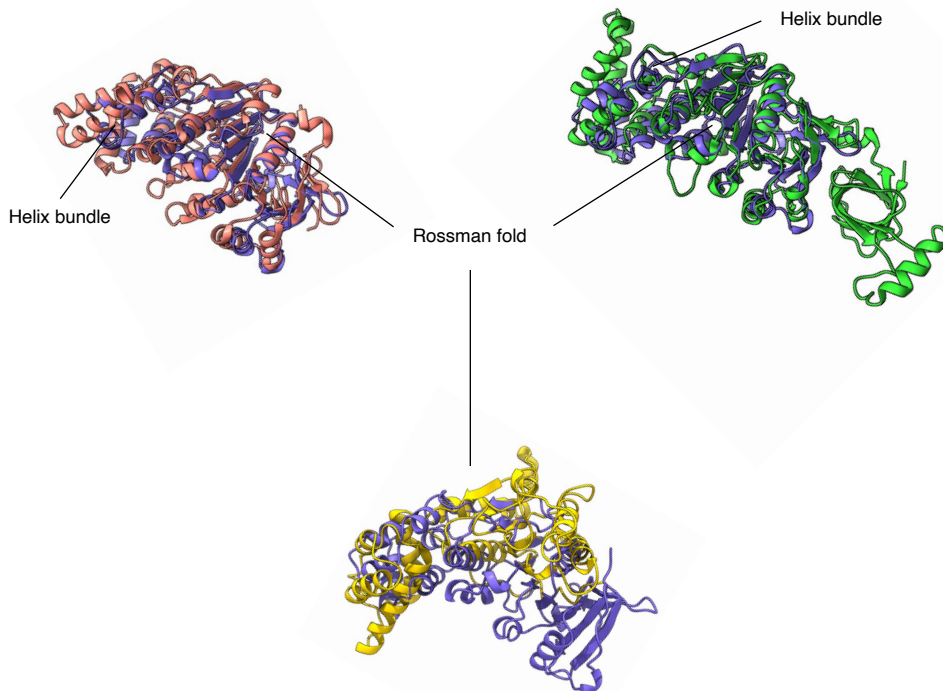

**b**

|     | Walker A: GXXXXGK [T/S]                                              | Walker B: HHHHD (E)            |
|-----|----------------------------------------------------------------------|--------------------------------|
| Apa | 0001 s001A MKASKLAVKLLKTEENDEIIYDPIYHGRTLKVIGIDDDPALVMEYLLAQYKEKGYNV | NAFLTLAAMLEDRRVAAYGLYDVSVLTF   |
|     | 0002 4ag6B NDGS--GIVLGKDRDGLVLVDIWK-NSNMTILAKPGGKSPFAKLLLRREYXQGSRV  | AQYFNVLSFWNILERTVLVVDEN-XLV    |
|     | 0003 7es4A ----PLQILFGHDRVQNPPLYWEPFXNTNTGIIIGTX-GKTKSLVTLQXRNQIGL   | LVVALTLDLPYA-LTKXILVDEDFNFXR   |
|     | 0004 4d2iA SQDG--QIRIGSLGKNVEVKLNI-NFAHLAIIAATGGKSNIVAVLSQRISELGGSV  | AVVSHYLRRLDSFPIIAVIEEAVFLS     |
|     | 0005 8rtbB PTGNPWAVTILKTVSGTPLYNFHASLGNMILIGQSSGKTVILGFLLAQAKFKPTI   | FVMYLLYRTESMIRFMYVDFEFWKPLQ    |
|     | 0006 8rtdT PTGNPWAVTILKTVSGTPLYNFHASLGNMILIGQSSGKTVILGFLLAQAKFKPTI   | FVMYLLYRTESMIRFMYVDFEFWKPLQ    |
|     | 0007 8do1A IKAKKREVIQRRGLGDFIAYAGQ---AIIGLIAPTRCKGVIMPNMINYP---QNI   | PILLEFFNVMIIY-RSCMLMDEFITLGG-  |
|     | 0008 2iutA -EHSKSVPLALGHDIGRPIITDLAK-MPELLVAGTT-GKSVQVNAMLLSILFKSARL | KEAANALRWSVAEPTIVVVVDFEADMMM   |
|     | 0009 1e9sA MTTREAKQVTV-----GVPMP-RDAEPHLLVNGATGGKSVILRELAYTGLLRGDRM  | AWVDVVCSTISLSRLRWLWLEIDEIAS--I |
|     | 0010 4nh0A -QRNRLRVPIGLDADGRPLELDIKMGPELCLIGAT-GKSEILRRLVLAAMTHLNF   | DRMYDALHGEMV-PTLFIIVLDEFSELLS  |
|     | 0011 4lyxA -HRASGFIPVGLDQTVRPAVAINXRT-DPECLIVGSRGKTNVVKVILESLLVQEPSI | ERLAQWLNEADAVPVVVFVDSILRLLOQ   |
|     | 0012 7wrxC MEEA--AFPGLLADGQPLPLN-FRFIGHINISIGSGTKTSVALFLLHSIFRSGGRA  | FVVGVLLEVFVYDTPVVFVLDENKRYAF   |
|     | 0013 4kfrB -----MNPD--DIVVLVGRKKGKSYILKVFIPVLKAHKISY                 | DFFEKLWQASKLHSTVLIIDENYHYFQ    |
|     | 0014 6sz9A -----ITFFGNDKTGEELWFA-NDDMTEALIFGSTGKKTETLVSLSYNALVQSGSF  | DLGKIIVSSLK---YMCILDEYGY---    |
|     | 0015 6tv1A ---ANGALPIGLDYGVTLQKIKLT---EPAMISSNPREIAHIAEIM-MKEIDIKYAI | KAIHQLMIEDLK-KISLYIINDFKTFID   |
|     | 0016 8gjaF ---RDHLTT---QQLDGILT---TTEIAGESAGKTOICMQLCLTVQLGGGA       | DDLHYCVSKVPVLLKLIITDSTAAALFR   |
|     | 0017 2f1hA ---VVKLSTSSSE---GGLE---SVTEFAGVFGGKTOIMHQSCVNLQNPQPKA     | QMQMLFAEKIEDLNKLVVIDSITSTFR    |
|     | 0018 3io5B ---VVRTK---PMMNGMQS---GLLILAGPSKFKSNHGLTMVSSYMRQYAVC      | EQRLRIDMVNQLD-EKVVVFIDISGNL-R  |
|     | 0019 8fazX ---SLKEIE-----PNLF---DLEFHHGPEGKGTETLVHLTARCIILEVEV       | THLLLTLYLSLESMFCLLILDSIGAF--   |
|     | 0020 8ouyC ---AILSTGI-----GSLDGLYT---EVTETIVGGPGKTOVCLCMANVAHLQONV   | FQMLDVLQELRG-TKVVVVDSVAVVS     |
|     | 0021 4wiaA ---ELARI-----KRIGGIPH---GSLIIEGESSKSVICQRLAYGFLQNRYSV     | DGFLKKVXETRAYEIVVIFDSIALIA     |

**Supplementary Figure 3: Structural comparison between Apa and representative hits from the DALI web server.**

**a**, Comparison of Apa (purple) and structurally similar proteins. Left: ATP-dependent protein translocase Vir4 (PDB 4AG6, salmon); Middle: the hexameric AAA+ ATPase proteasome activator PAN (PDB 6HE4, gold); Right: the hexameric AAA+ ATPase HerA (PDB 4D2I, lime green). Common structural features of AAA+ ATPases are indicated. **b**, Structure-based sequence alignment of Apa (on top) vs. high-scoring DALI hits from the PDB25 subset, ranked by significance (Z-score). Red boxes highlight the conserved ATP binding and hydrolysis motifs, which are absent in Apa. The locations of the degenerated ATP-binding sites on Apa correspond to the lower protomer-protomer interface area, thereby preventing access to a small molecule to the hypothetical binding site.

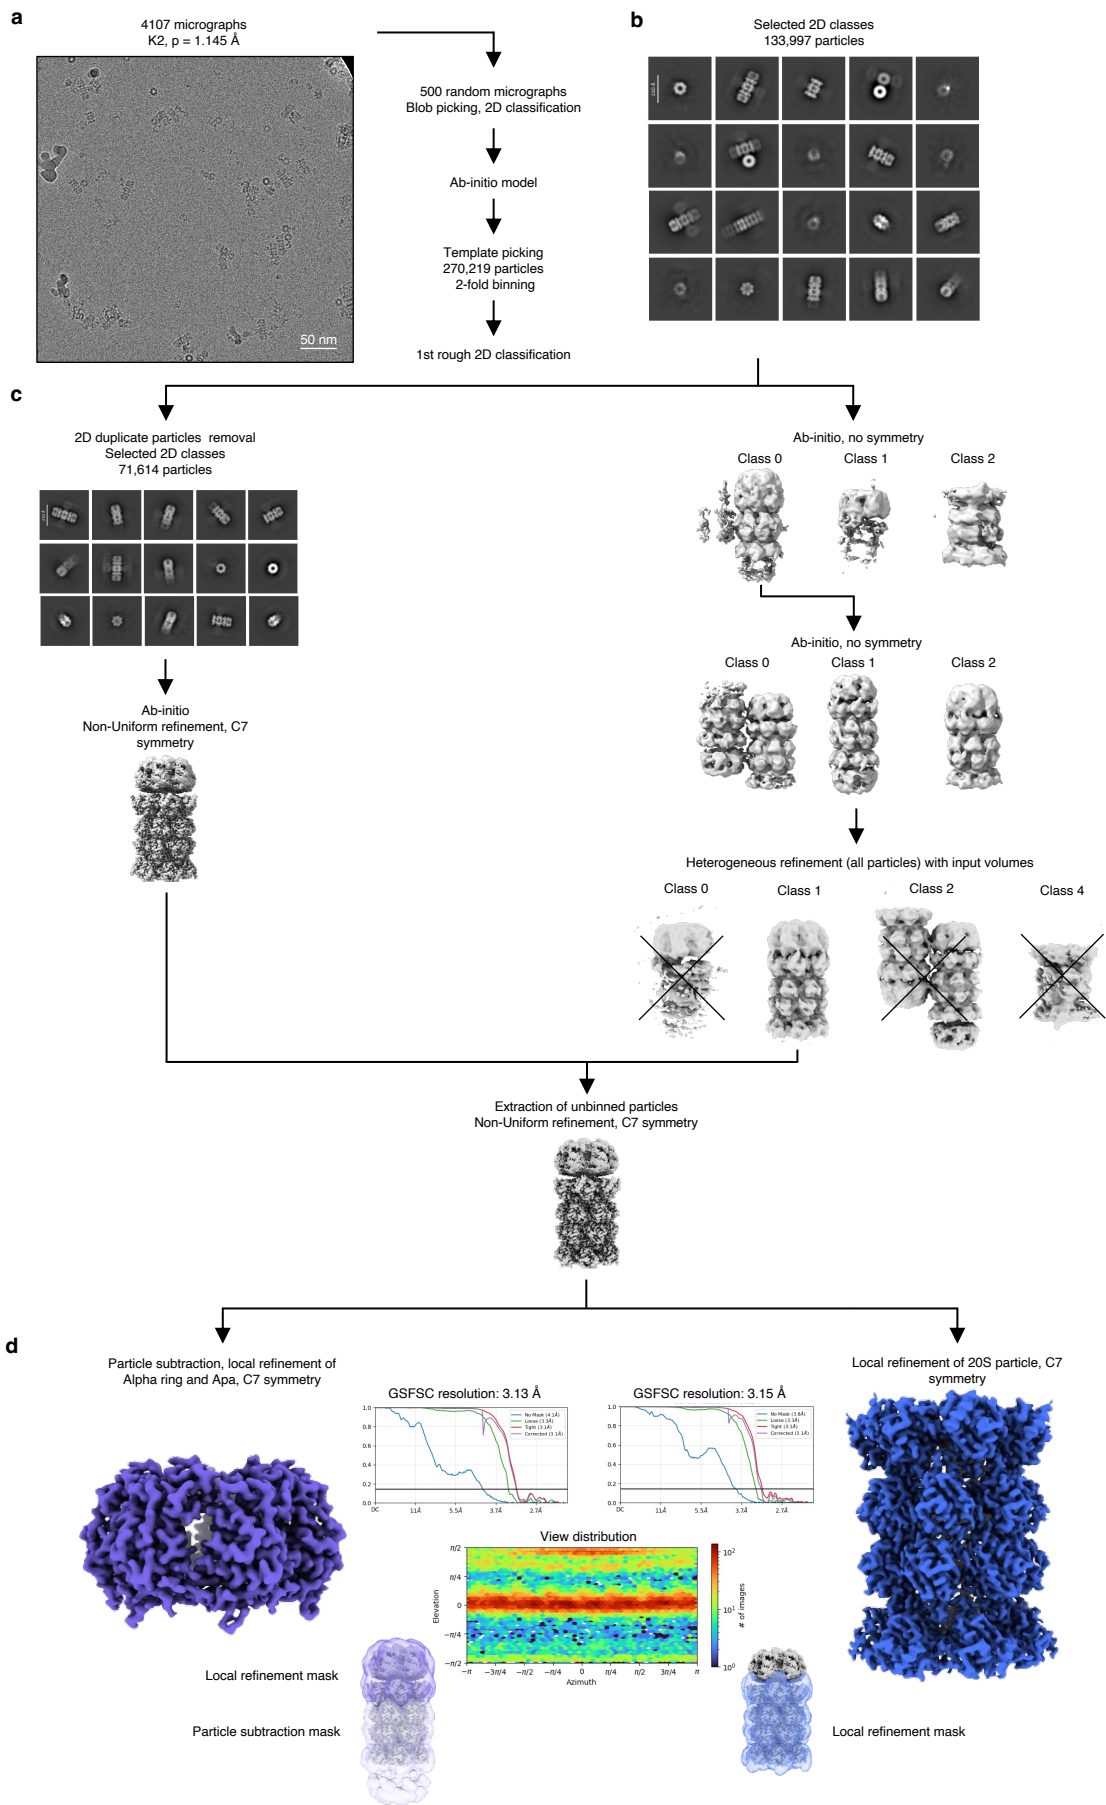

### Supplementary Figure 4: Cryo-EM data processing flowchart.

**a**, Representative micrograph of the Apa-20S CP complex and first steps of particle curation. Uncapped proteasomes are visible along with singly or doubly capped 20S CP particles. **b**, Selected 2D classes of the first coarse round of classification. Due to the strong tendency of 20S CP particles to cluster together on CryoEM grids, some classes contain duplicated views. **c**, Outline of the strategy used to obtain the first consensus volume. **d**, Locally refined maps of Apa and the 20S CP. Middle page: GSFSC curves for each reconstruction, angular distribution of the common particle set and masks used for particle subtraction or local refinement.

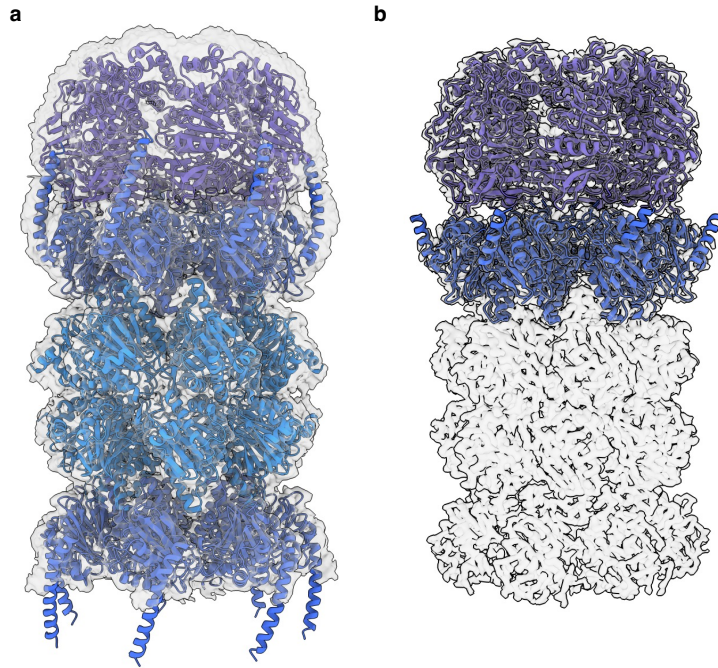

**Supplementary Figure 5: Models of the Apa-20S CP complex**

**a**, AlphaFold 3 predictions of the interaction between Apa (purple) and the 20S CP  $\alpha$  ring (blue) docked into the low contour consensus map of the Apa-20S CP assembly. Additional AlphaFold 3 models for the  $\beta$ 1 and  $\beta$ 2 rings are represented in light blue. **b**, Atomic model of Apa (purple) and the 20S CP  $\alpha$  ring (blue) were built inside the two focused maps, resulting in the  $\alpha$  ring model being truncated (PDB 9S34).

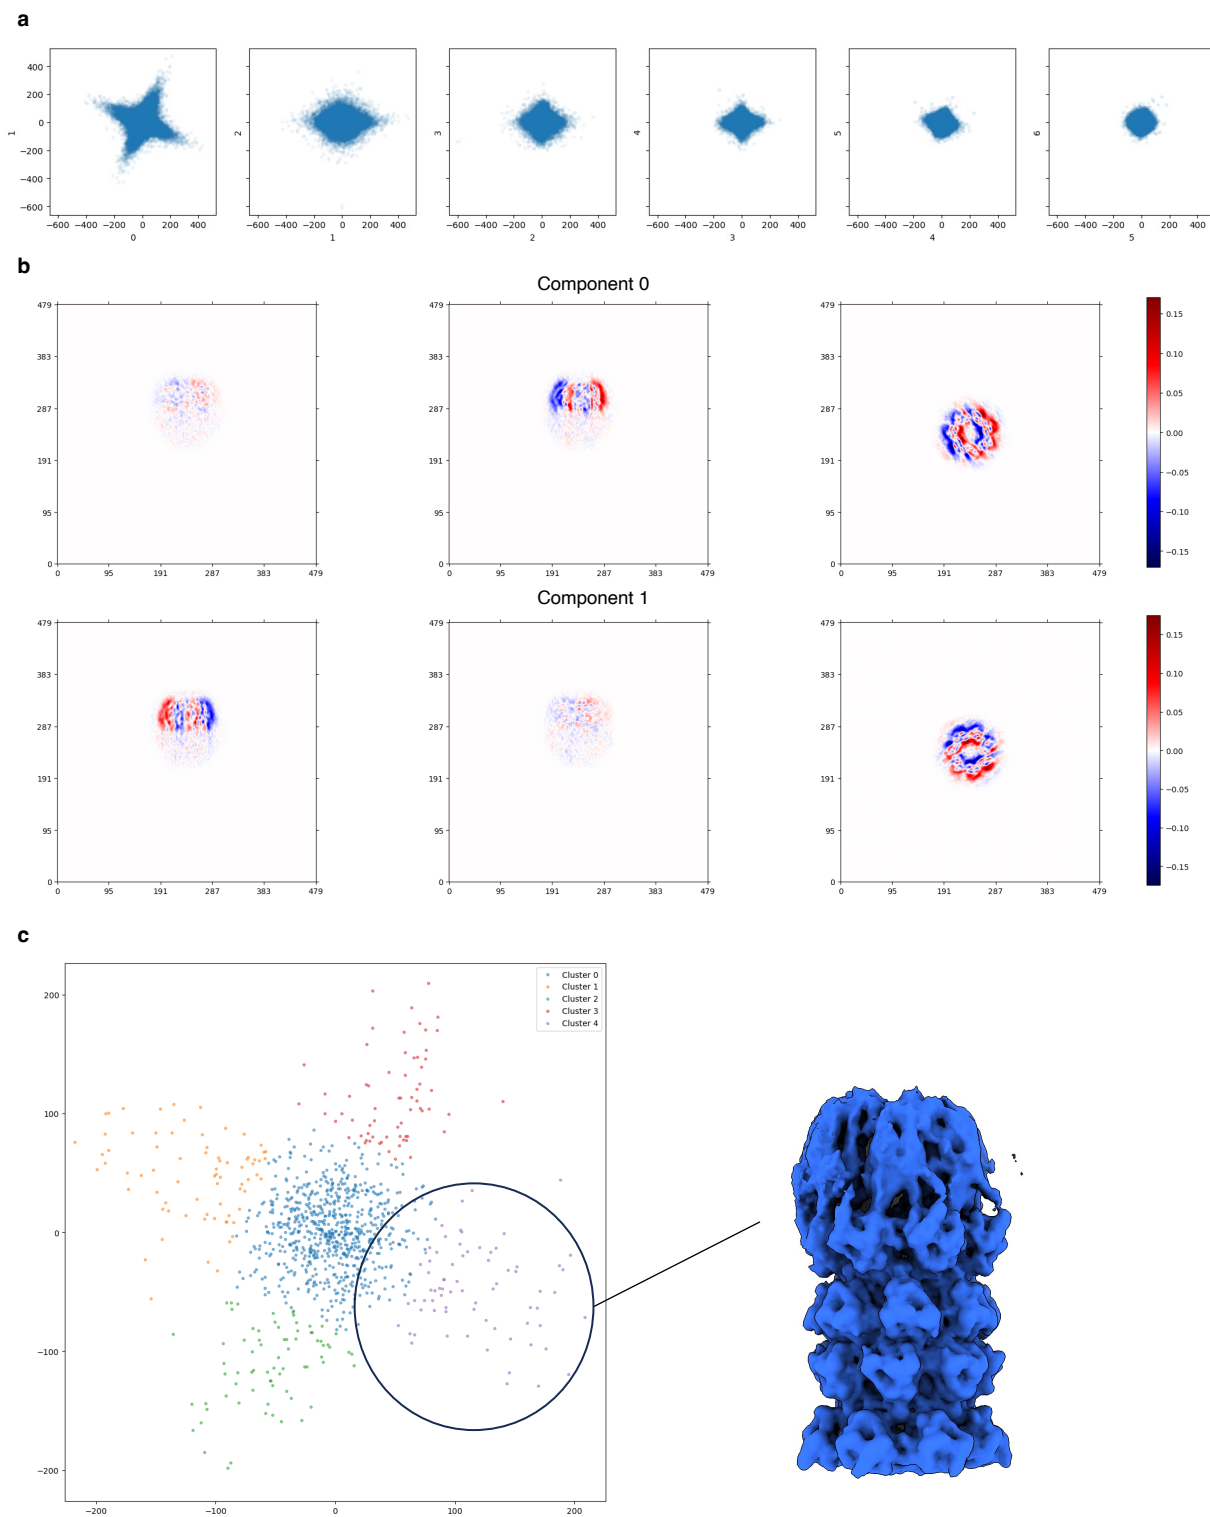

**Supplementary Figure 6: 3D variability analysis of the alignments of Apa with respect to the 20S CP.**

**a**, Distribution of particles along the first six principal components computed by the 3D Variability Analysis (3DVA) tool in CryoSPARC. The smooth distribution of particles suggests a continuous rather than discrete heterogeneity in the dataset. **b**, Detail of components 0 and 1. Differences captured by each principal component are here visualised in 2D as addition and subtraction of volume density, with red corresponding to added density and blue indicating a subtraction. **c**, The same variability along components 0,1 is here visualised in clustering mode. Clusters occupying the edges of the distribution correspond to a tilted state of Apa on top of the proteasome. The variability along components 0,1 is also summarised as a volume series in Supplementary Video 1.

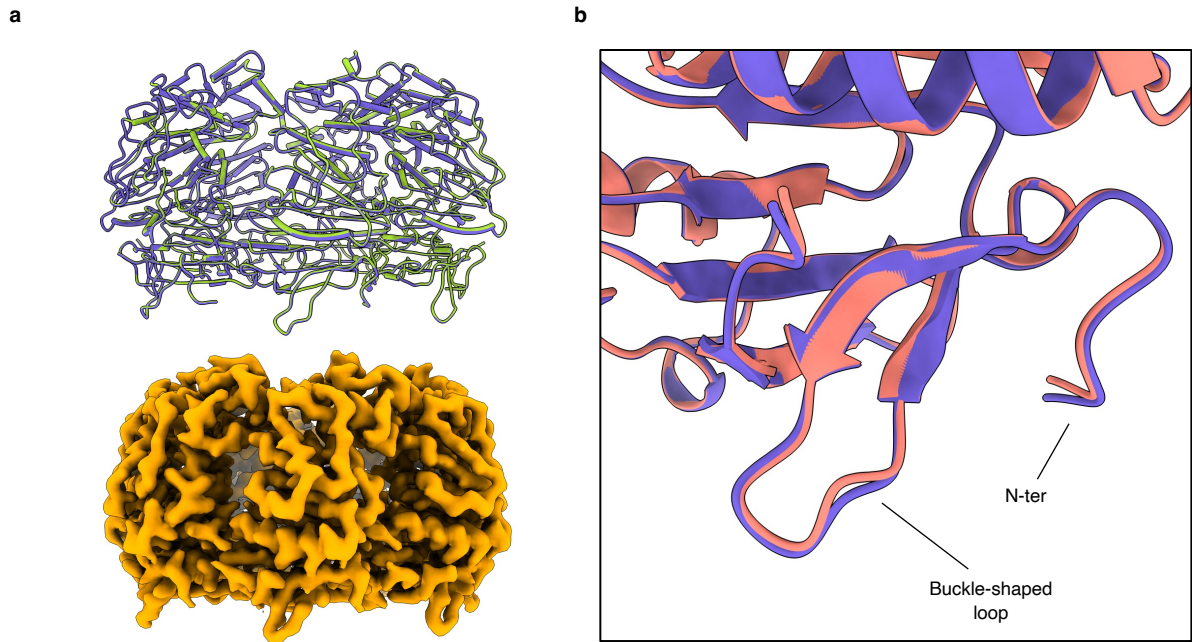

**Supplementary Figure 7: Structural comparison of Apa in its 20S CP-bound and free form.**

**a**, Top: Overlay of the backbone from the cryo-EM models of Apa in its 20S CP-bound (purple) and alone in solution (lime green), showing no trace of major rearrangements (RMSD 0.1 Å between 300 C $\alpha$ s). Bottom: Cryo-EM map of Apa alone in solution. **b**, Superposition detail of the unbound X-ray (salmon) vs. proteasome-bound (purple) cryo-EM Apa structure, showing the persistence of the buckle-shaped loop (RMSD 0.33 Å between 300 C $\alpha$ s).

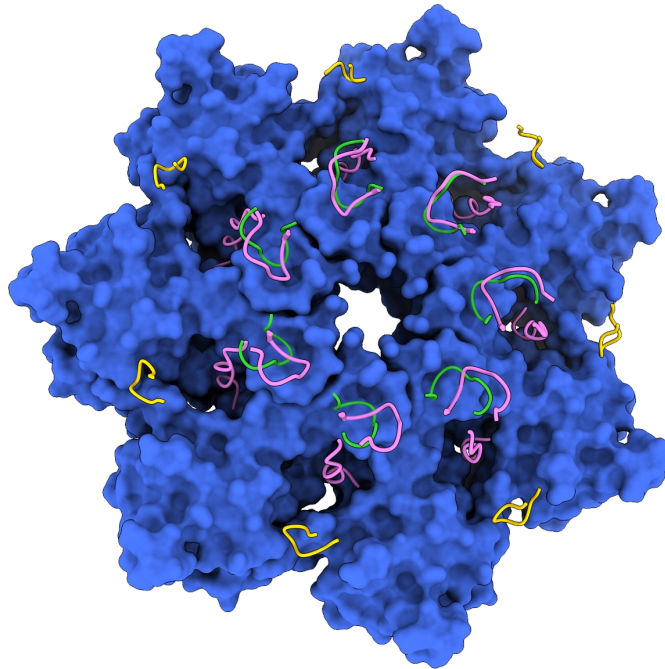

**Supplementary Figure 8: Structural comparison of the activation loops used by 11S activators vs Apa.**

Overlay of the buckle-shaped loops of Apa (shown as a cartoon in gold) vs. the activation loops from the eukaryotic ATP-independent proteasome activator PA28 from *Plasmodium falciparum* (PDB 6MUX, shown as a cartoon in lime green) and the combination of activation loops and docking C-termini from the PA26 activator of *Trypanosoma brucei* (PDB 1FNT, shown as a cartoon in pink). The  $\alpha$  rings from *P. falciparum* and *T. brucei* have been superimposed to our model, which is the only one shown as a blue coloured surface (RMSD 0.91 Å over 231 C $\alpha$ s for PA28 and 0.99 Å over 199 C $\alpha$ s for PA26).

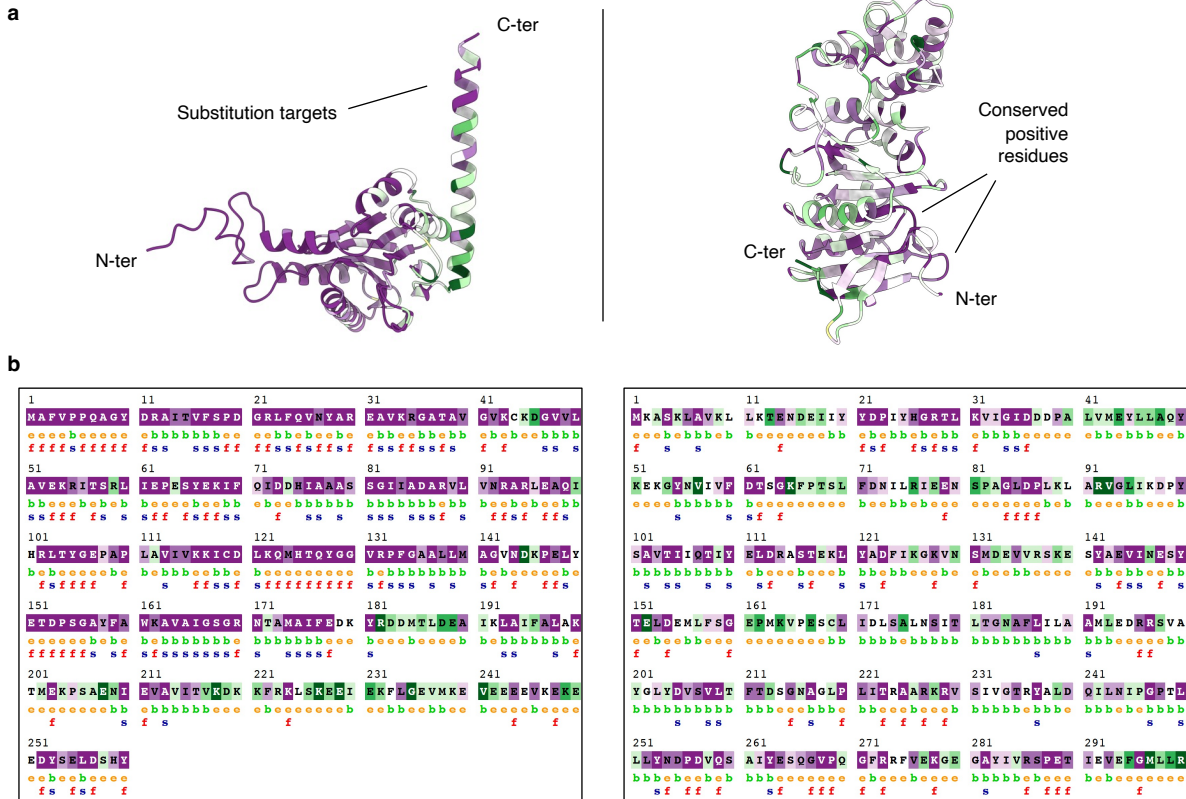

**Supplementary Figure 9: Conservation of the 20S CP  $\alpha$  subunit and Apa.**

**a**, Left: Conservation score computed using the ConSurf webserver mapped on the AlphaFold2 model of the 20S CP  $\alpha$  subunit, using all 100 RefSeq sequences from Archaea. The region where substitutions were performed is indicated. Conservation scores ranges from low (dark green) to high (dark purple). Right: conservation score mapped on our model of Apa, computed using all the 60 complete sequences within the *Thermococcales* order found by BlastP. **b**, Left: ConSurf conservation scores mapped on the sequence of the 20S CP  $\alpha$  subunit, including predictions for buried (b) and exposed (e) residues as well as predicted functional (f) and structural (s) residues. Right: same for the Apa sequence.

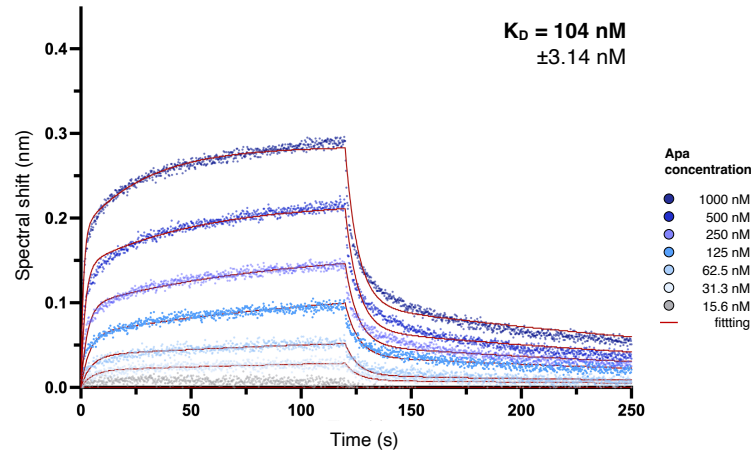

**Supplementary Figure 10: BLI sensorgram of the Apa-20S CP ( $\alpha$ E248Q,D252N,E255Q,D257N) interaction.**

Disruption of the charge with a preserved side chain size causes a net decrease in affinity compared to the wild-type interaction, resulting as well in a higher dissociation rate ( $K_a = 2.68 \times 10^4 \text{ 1/Ms}$ ;  $K_{dis} = 2.79 \times 10^{-3} \text{ 1/s}$ ).

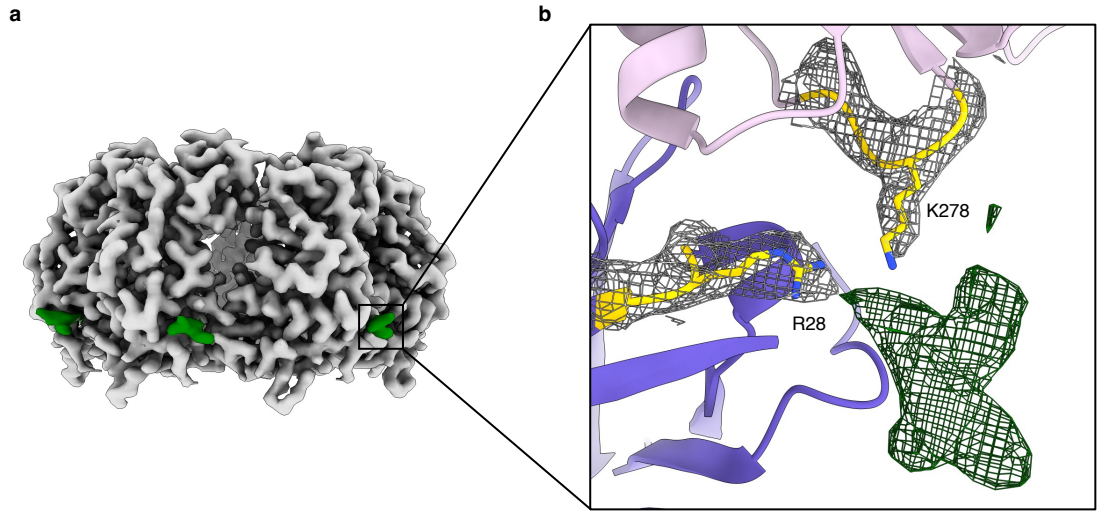

**Supplementary Figure 11: Additional density observed in the focused cryo-EM map of 20S CP-bound Apa.**

**a**, Unmodeled density is shown in green around the refined Apa map. **b**, Detail of the unmodelled density and its proximity to the conserved and positively charged residues in between two Apa protomers (coloured in purple and thistle).

**a**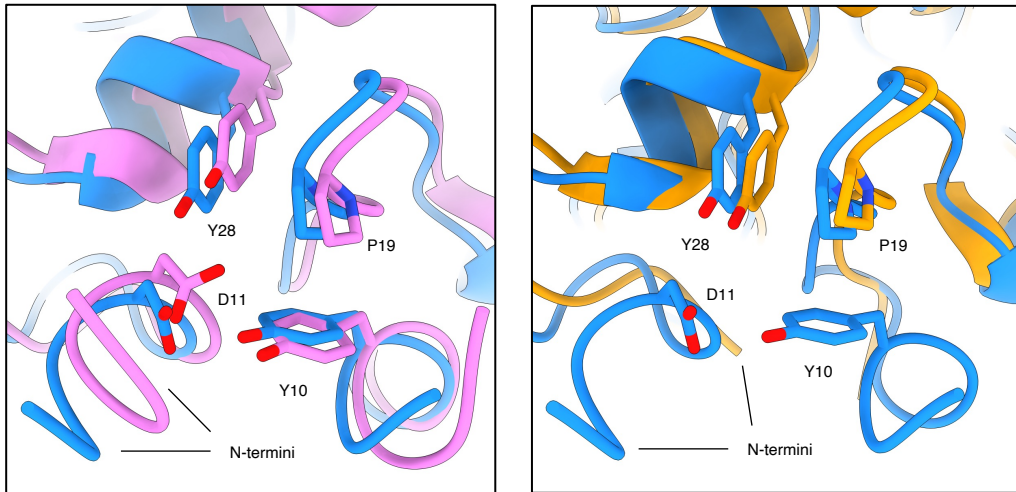**b**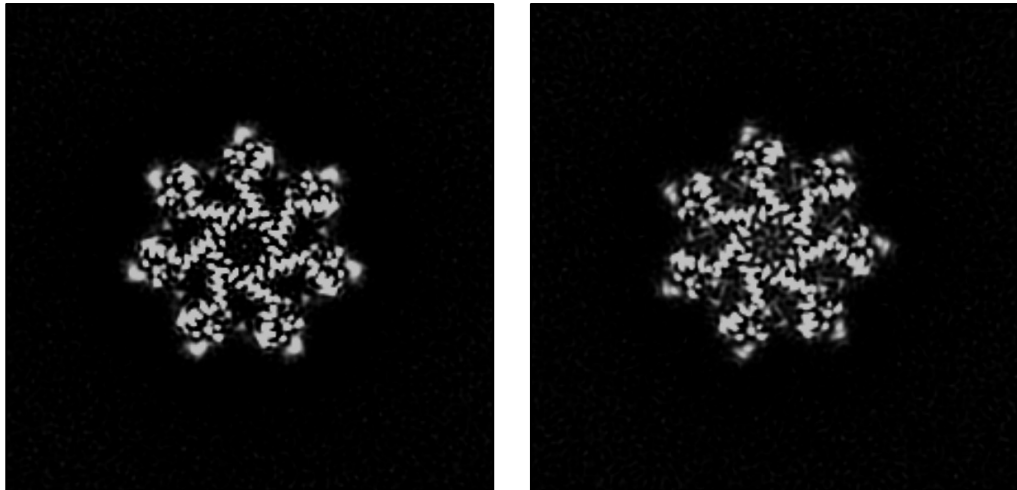

### Supplementary Figure 12: $\alpha$ subunit gating in Apa-20S CP complexes.

**a**, Left: Overlay of the four interlocking residues between two  $\alpha$  subunit protomers of the Apa-bound 20S CP (blue) with the open-gate  $\alpha$  subunit state in the *Archaeoglobus fulgidus* PAN-20S proteasome (pink, PDB 6HE8, RMSD 0.91 Å between 208 C $\alpha$ s). D11-Y10 likely establish H bonds, whereas Y28-P19 bind through CH/ $\pi$  interactions. The outward-facing N-termini are visible in the foreground. The first seven N-terminal residues displayed a smeared EM density, prompting us to model  $\alpha$  gates starting from A8. Right: overlay of the same residues (blue) with the inactive closed-gate  $\alpha$  subunit state in the *Archaeoglobus fulgidus* 20S proteasome (orange, PDB 6HE7, RMSD 0.84 Å between 201 C $\alpha$ s). The N-termini of the closed-gate 20S point inwards and exhibit a smeared electron density. **b**, Left: slice through density in the Apa-bound side of the 20S proteasome showing a clear axial channel. Right: slice through density in the unbound 20S side showing a density-occupied channel.

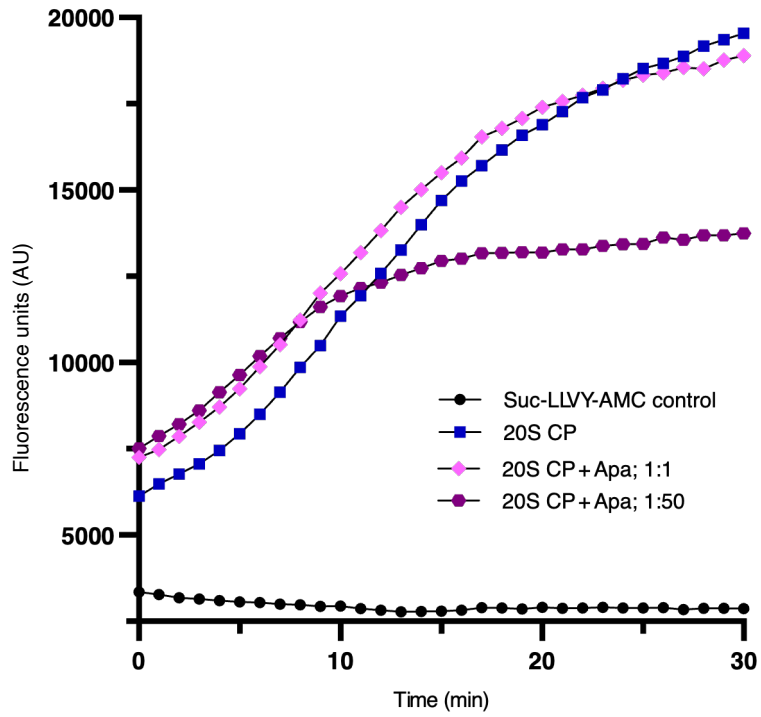

**Supplementary Figure 13: Apa does not enhance the hydrolysis of Suc-LLVY-AMC by the 20S CP.**

The degradation of Suc-LLVY-AMC was monitored by measuring fluorescence at 460 nm in 50 mM Tris pH 8.00 + 300 mM NaCl at 55 °C. 10  $\mu$ M substrate was incubated with 70 nM 20S CP and the indicated molar ratios of Apa. Error bars are not shown for visualization purposes.

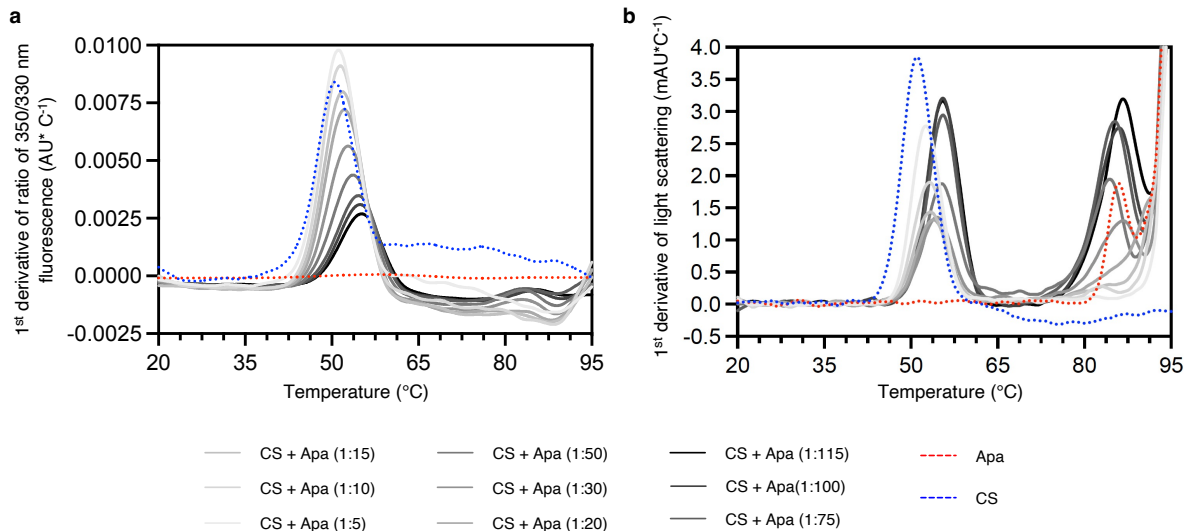

**Supplementary Figure 14: Chaperone activity of Apa toward the model substrate citrate synthase.**

**a**, First derivative of the fluorescence ratio measuring the denaturation of citrate synthase in the presence of Apa over a broad temperature range, measured with a NanoTemper nanoDSF machine. **b**, First derivative of the light scattering measurements of citrate synthase in the presence of Apa over a broad temperature range. Titration ratios of Apa over citrate synthase show that the presence of Apa slows down its thermal-dependent unfolding and aggregation.

Tree scale: 1

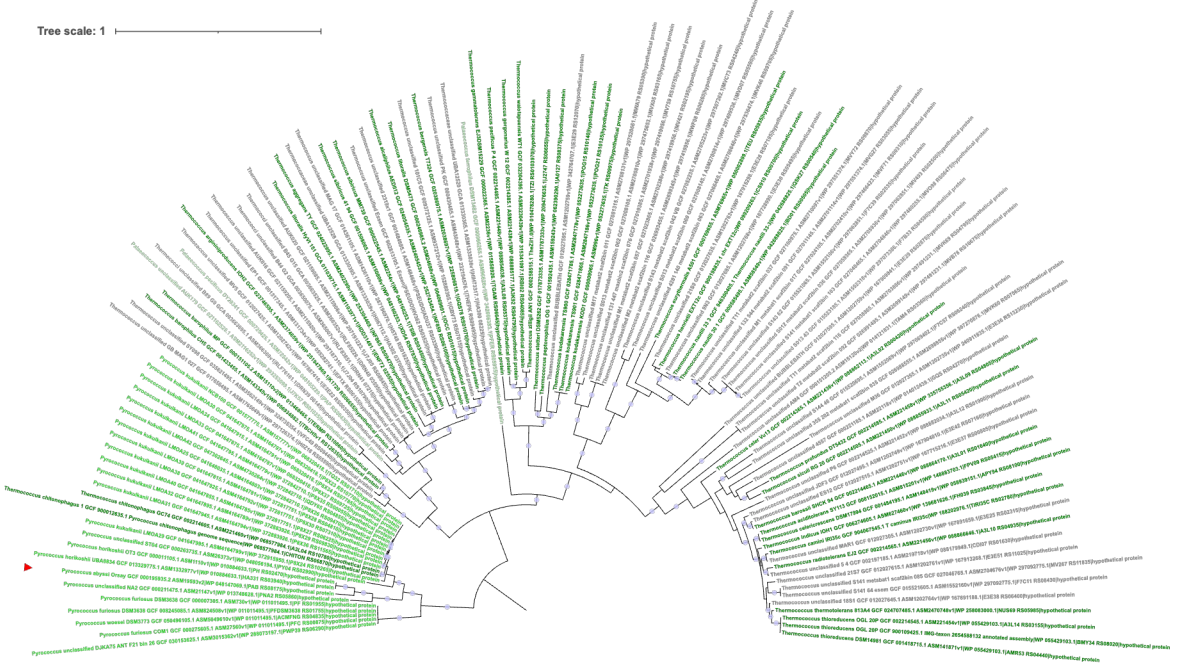

**Supplementary Figure 15: Phylogeny of Apa homologue proteins.**

The tree was built from 116 sequences and 294 amino acid positions using Maximum Likelihood. The tree has been rooted on the clade encompassing the *Pyrococcus* genus, in agreement with the species tree inferred from ribosomal proteins. Circles at nodes correspond to ultrafast bootstrap values greater than 90% (1,000 replicates). The scale bar represents the average number of substitutions per site.

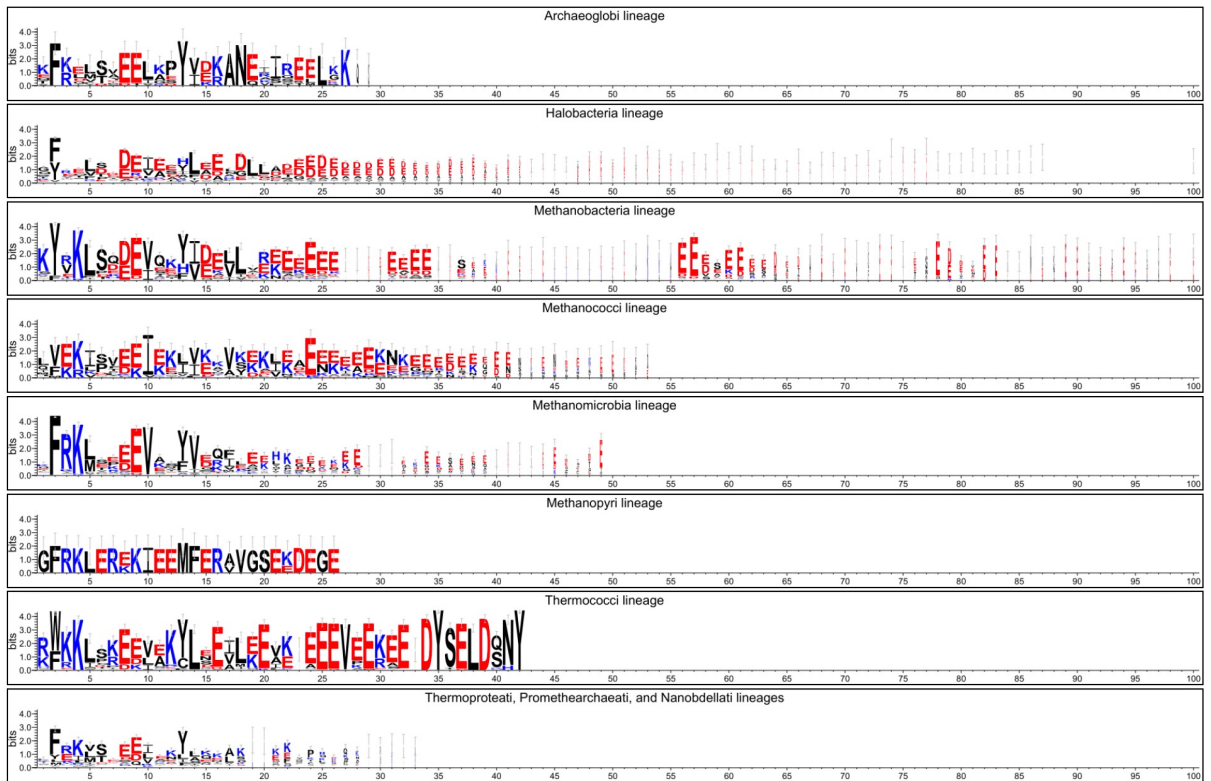

**Supplementary Figure 16: Conservation of the C-terminal extension of proteasome  $\alpha$  subunits in major archaeal lineages.**

Pictures correspond to Weblogos. The height of the stack indicates the sequence conservation at that position, while the height of a letter within a given stack indicates the relative frequency of the corresponding amino acid at that position. The relative position of amino acids is conserved among logos.

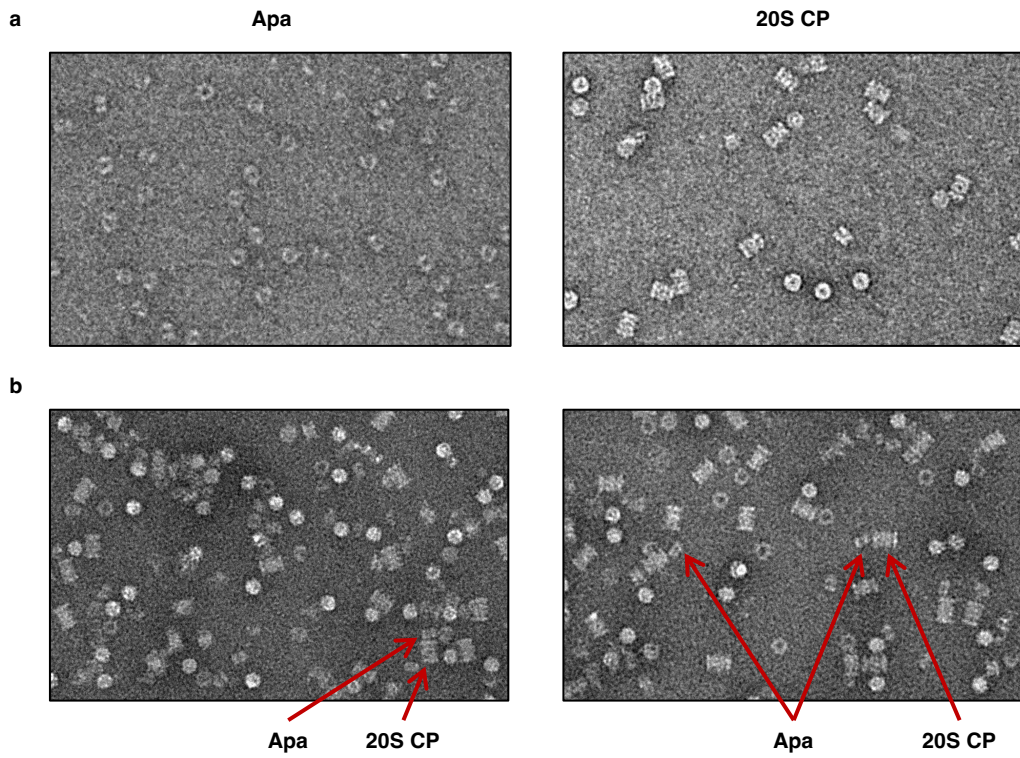

**Supplementary Figure 17: Negative staining TEM of Apa-20S CP complexes.**

**a**, Example micrographs of fractions containing only Apa or the 20S CP. **b**, Example micrographs of fractions corresponding to complexes. Tilting or partial dissociation is observable in most assemblies, with only a few views showing properly assembled complexes.

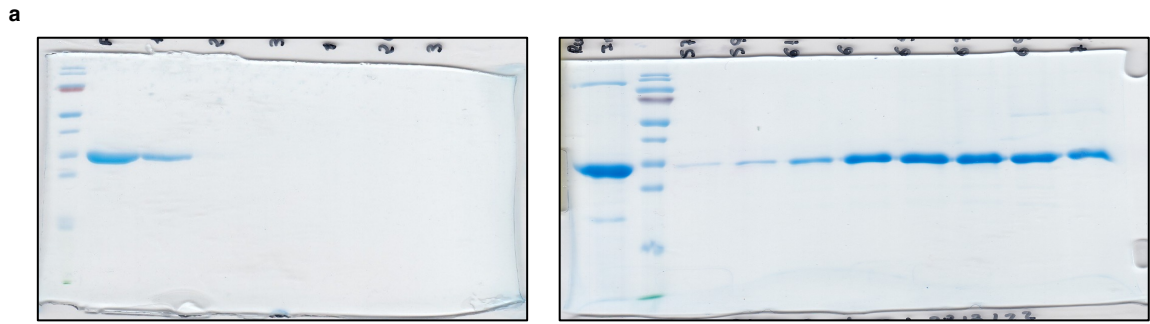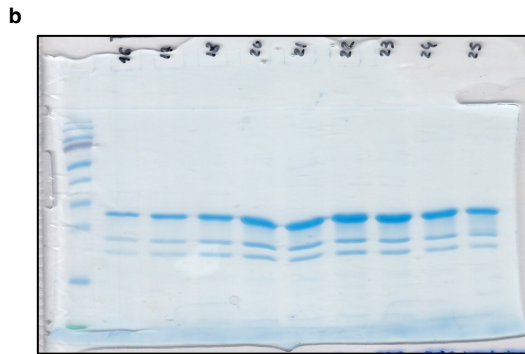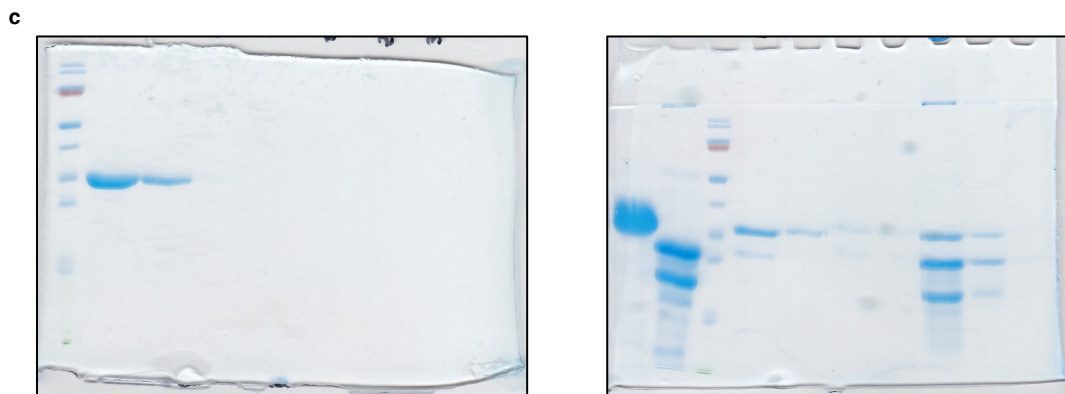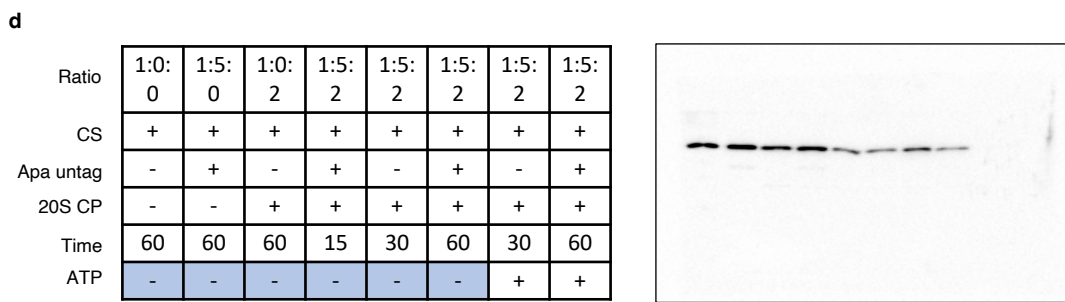

**Supplementary Figure 18: Unprocessed gel images.**

**a**, Left: Untagged Apa purification gel used in Figure S1. Right: His-tagged Apa purification gel used in Figure S1. **b**, 20S CP purification gel used in figure S1. **c**, Left: control pull-down gel with Apa against resin. Right: Apa-20S CP pull down gel. **d**, CS degradation assay Western-blot. Left: table with proportions of proteins. Right: corresponding bands from left to right.

**Supplementary Table 1: Primers and cloning strategies for recombinant expression.**

| Plasmid name  | Forward -primer *                    | Reverse-primer *                         | Cloning strategy                                                                                                                                                                                                                             |
|---------------|--------------------------------------|------------------------------------------|----------------------------------------------------------------------------------------------------------------------------------------------------------------------------------------------------------------------------------------------|
| pET30a-Apa-H6 | CAAT <u>CATATG</u> AAAG<br>CCAGCAAAC | CAAT <u>CTCGAG</u> ACGCA<br>GCAGCATACCAA | Synthetic gene of full-length <i>P. abyssi</i> Apa (M <sup>1</sup> -R <sup>300</sup> ) optimized for expression in <i>E. coli</i> inserted into the pET30a (+) vector between the NdeI and XhoI restriction sites, followed by a 6x-His tag. |
| pET30a-Apa    | CAAT <u>CATATG</u> AAAG<br>CCAGCAAAC | CAAT <u>CTCGAG</u> TTAAC<br>GCAGCAGC     | Modification of pET30a-Apa-H6 plasmid with the insertion of a stop codon before the XhoI restriction site and the His tag.                                                                                                                   |

\* Restriction site sequences for directional cloning are underlined.

**Supplementary Table 2: Sequencing primers for protein expression vectors**

| Primer name       | Parental DNA | Primer sequence (from 5' to 3') | Comments                                                                                               |
|-------------------|--------------|---------------------------------|--------------------------------------------------------------------------------------------------------|
| T7 promoter (fwd) | pET vectors  | TAATACGACTCACTATAGGG            | Forward primer to sequence the N-terminal end of the clonings performed and inserted into pET vectors. |
| T7 terminal (rev) | pET vectors  | GCTAGTTATTGCTCAGCGG             | Reverse primer to sequence the C-terminal end of the clonings performed and inserted into pET vectors. |

**Supplementary Table 3: Recombinant *Pyrococcus abyssi* proteins**

| Recombinant proteins            | Restriction enzymes | Protein sequence *                                      | Modifications                      | Extinction coefficient (M <sup>-1</sup> .cm <sup>-1</sup> ) | MW (Da) |
|---------------------------------|---------------------|---------------------------------------------------------|------------------------------------|-------------------------------------------------------------|---------|
| Pa20S_α                         | Ndel/XhoI           | M <sup>1</sup> +Y <sup>260</sup>                        |                                    | 20525 <sup>**</sup> /20400 <sup>***</sup>                   | 28994.3 |
| Pa20S_α_E244A_D252A_E255A_D257A | Ndel/XhoI           | M <sup>1</sup> +Y <sup>260</sup>                        | E244A_D252A_E255A_D257A            | 20525 <sup>**</sup> /20400 <sup>***</sup>                   | 28790.2 |
| Pa20S_α_E248Q_D252N_E255Q_D257N | Ndel/XhoI           | M <sup>1</sup> +Y <sup>260</sup>                        | E248Q_D252N_E255Q_D257N            | 20525 <sup>**</sup> /20400 <sup>***</sup>                   | 28990.3 |
| Pa20S_β1-ΔN-Ctag_His            | Ndel/XhoI           | M+T <sup>7</sup> +L <sup>197</sup> +LE+ H <sub>6x</sub> | Nter deletion (1-6)<br>6xHis C-ter | 21430                                                       | 22076.5 |
| Pa20S_β2-ΔN                     | Ndel/XhoI           | M+T <sup>11</sup> +Q <sup>207</sup>                     | Nter deletion (1-10)               | 18910                                                       | 21626.1 |
| Apa                             | Ndel/XhoI           | M <sup>1</sup> -R <sup>300</sup>                        |                                    | 25330                                                       | 33479.5 |
| Apa-Ctag_His                    | Ndel/XhoI           | M <sup>1</sup> -R <sup>300</sup> +LE+ H <sub>6x</sub>   | 6xHis C-ter                        | 25330                                                       | 34544.6 |

\* Peptide sequence of the expressed protein. Amino acids derived from the construct are in bold. See also Supplementary Fig. 1.

\*\*assuming all pairs of Cys residues form cystines

\*\*\*assuming all Cys residues are reduced

**Supplementary Table 4: SEC-MALS peak analysis.**

| Recombinant proteins     | Peak 1 (P1)       |                   |                        |                   | Peak 2 (P2)       |                   |                        |                   |
|--------------------------|-------------------|-------------------|------------------------|-------------------|-------------------|-------------------|------------------------|-------------------|
|                          | Mw (kDa)          | Mn (kDa)          | Polydispersity (Mw/Mn) | Mass fraction (%) | Mw (kDa)          | Mn (kDa)          | Polydispersity (Mw/Mn) | Mass fraction (%) |
| Pa20S                    | 745.2<br>(±1.3%)  | 744.3<br>(±1.3%)  | 1.001<br>(±1.9%)       | 73.5              | 1549.9<br>(±1.4%) | 1511.3<br>(±1.4%) | 1.026 (±1.9%)          | 26.5              |
| Apa                      | 250.8<br>(±1.4%)  | 250.5<br>(±1.4%)  | 1.001<br>(±2.0%)       | 93.4              | 416.8<br>(±1.4%)  | 416.5<br>(±1.4%)  | 1.001 (±2.0%)          | 6.6               |
| Pa20S and Apa in complex | 1033.4<br>(±1.4%) | 1032.0<br>(±1.4%) | 1.001<br>(±1.9%)       | 92.3              | 1698.6<br>(±1.3%) | 1692.5<br>(±1.3%) | 1.004 (±1.9%)          | 7.7               |

**Supplementary Table 5: Crystallographic data collection, refinement and validation statistics.**

|                                       | Native Apa             | TbXo4 derivative       |
|---------------------------------------|------------------------|------------------------|
| PDB code                              | 30PG                   | N/A                    |
| <b>Data collection and processing</b> |                        |                        |
| Source/Beamline                       | SOLEIL/Proxima1        | SOLEIL/Proxima1        |
| Spacegroup                            | P 3 <sub>2</sub> 1 2   | P 3 <sub>2</sub> 1 2   |
| Unit cell dimensions                  |                        |                        |
| a, b, c (Å)                           | 129.36, 129.36, 303.54 | 129.32, 129.32, 302.66 |
| α, β, γ (°)                           | 90, 90, 120            | 90, 90, 120            |
| Wavelength (Å)                        | 1.033                  | 1.649                  |
| Resolution (Å)                        | 49.23 – 1.95           | 49.16 – 2.50           |
| (Highest resolution shell)            | 2.05 – 1.95            | 2.63 – 2.50            |
| No. measured reflections              | 4421703                | 3991066                |
| No. unique reflections                | 212021                 | 100708                 |
| Rmerge                                | 0.111 (1.013)          | 0.111 (0.594)          |
| Rpim                                  | 0.025 (0.233)          | 0.018 (0.107)          |
| CC(1/2)                               | 1.000 (0.890)          | 0.999 (0.947)          |
| I/σ(I)                                | 22.8 (3.9)             | 29.8 (6.9)             |
| Completeness (%)                      | 99.9 (99.2)            | 99.9 (99.2)            |
| Multiplicity                          | 20.9 (19.7)            | 39.6 (31.1)            |
| <b>Refinement</b>                     |                        |                        |
| No. reflections                       | 211063                 | N/A                    |
| Rwork/Rfree                           | 0.1499/0.1806          | N/A                    |
| No. of non-H atoms                    | 18891                  |                        |
| Protein residues                      | 16747                  |                        |
| Ligand/ion                            | 132                    | N/A                    |
| Water                                 | 2012                   |                        |
| B factors (Å <sup>2</sup> )           | 31.58                  |                        |
| Protein                               | 30.57                  |                        |
| Ligand/ion                            | 55.41                  | N/A                    |
| Water                                 | 38.48                  |                        |
| R.m.s. deviations                     |                        |                        |
| Bond lengths (Å)                      | 0.013                  | N/A                    |
| Bond angles (°)                       | 1.210                  |                        |
| Clashscore                            | 4.93                   | N/A                    |
| Ramachandran plot                     |                        |                        |
| Favored (%)                           | 99.38                  |                        |
| Allowed (%)                           | 0.62                   | N/A                    |
| Disallowed (%)                        | 0                      |                        |

**Supplementary Table 6: SAXS data and analysis.****Data collection and processing**

|                                          |                                                                                       |
|------------------------------------------|---------------------------------------------------------------------------------------|
| Instrument/source                        | beamline BM29 at the European Synchrotron Radiation Facility (ESRF, Grenoble, France) |
| Wavelength (Å)                           | 0.99                                                                                  |
| Beam energy (keV)                        | 12.5                                                                                  |
| Beam size (μm)                           | ~ 200 μm x 100 μm                                                                     |
| Sample-to-detector distance (mm)         | 2870                                                                                  |
| $q$ measurement range (Å <sup>-1</sup> ) | 0.044 - 0.52                                                                          |
| Absolute scaling method                  | Comparison with scattering from 1 mm pure water                                       |
| Normalisation                            | To transmitted intensity from beam stop counter                                       |
| Exposure time                            | 10 x 1 s frames                                                                       |
| Sample temperature (°C)                  | 25                                                                                    |

**Software employed**

|                            |                                                                |
|----------------------------|----------------------------------------------------------------|
| SAXS data reduction        | IspyB                                                          |
| Basic analysis (Guinier)   | PRIMUS from ATSAS 2.8.3                                        |
| Fitting with atomic models | CRY SOL from ATSAS 2.8.3                                       |
| Mass from $V_c$ (kDa)      | 4.2 mg/mL solution: 247.3 (insert ratio with theoretical mass) |

**Guinier analysis**

|                            |             |
|----------------------------|-------------|
| $R_g$ (Å)                  | 45.4 ± 0    |
| $I(0)$ (cm <sup>-1</sup> ) | 670.6 ± 0.4 |
| $qR_g$ min,max             | 0.48, 1.23  |

**CRY SOL (no constant subtraction)**

|                      |                       |
|----------------------|-----------------------|
| Crystal structure    | Native Apa (PDB 30PG) |
| $\chi^2$             | 3.48                  |
| Calculated $R_g$ (Å) | 43.9                  |

**Supplementary Table 7: Cryo-EM data collection, refinement and validation statistics.**

|                                                     | 20S Focused map | Apa in complex with 20S Focused map | Apa alone  |
|-----------------------------------------------------|-----------------|-------------------------------------|------------|
| EMDB code                                           | EMD-54518       | EMD-54519                           | EMD-55799  |
| PDB code                                            | 9S34            | 9S34                                | 9TCW       |
| <b>Data collection and processing</b>               |                 |                                     |            |
| Magnification                                       | 36000           | 36000                               | 36000      |
| Voltage (kV)                                        | 200             | 200                                 | 200        |
| Electron exposure (e <sup>-</sup> /Å <sup>2</sup> ) | 40              | 40                                  | 40         |
| Defocus range (μm)                                  | -1 to -2.5      | -1 to -2.5                          | -1 to -2.5 |
| Pixel size (Å)                                      | 1.145           | 1.145                               | 1.145      |
| Symmetry imposed                                    | C7              | C7                                  | C7         |
| Initial particle images (no.)                       | 534,489         | 534,489                             | 1,849,407  |
| Final particle images (no.)                         | 50,092          | 50,092                              | 1,722,565  |
| Map resolution (Å)                                  | 3.15            | 3.13                                | 2.71       |
| <b>0.143</b> FSC threshold                          |                 |                                     |            |
| Map resolution range (Å)                            | 3.15-5          | 3.13-5                              | 2.71-4     |
| <b>Refinement</b>                                   |                 |                                     |            |
| Initial model used (PDB)                            | N/A             | N/A                                 | N/A        |
| Model resolution (Å)                                | N/A             | N/A                                 | N/A        |
| Model resolution range (Å)                          | N/A             | N/A                                 | N/A        |
| Map sharpening <i>B</i> factor (Å <sup>2</sup> )    | -100.7          | -91.7                               | -96.7      |
| Model composition                                   |                 |                                     |            |
| Non-hydrogen atoms                                  | 29400           | 29400                               | 16492      |
| Protein residues                                    | 3759            | 3759                                | 2100       |
| Ligands                                             | 0               | 0                                   | 0          |
| <i>B</i> factors (Å <sup>2</sup> )                  |                 |                                     |            |
| Protein                                             | 79.11           | 79.11                               | 57.78      |
| Ligand                                              | N/A             | N/A                                 | N/A        |
| R.m.s. deviations                                   |                 |                                     |            |
| Bond lengths (Å)                                    | 0.007           | 0.007                               | 0.006      |
| Bond angles (°)                                     | 1.153           | 1.153                               | 0.873      |
| Validation                                          |                 |                                     |            |
| MolProbity score                                    | 0.96            | 0.96                                | 0.98       |
| Clashscore                                          | 1.97            | 1.97                                | 2.11       |
| Poor rotamers (%)                                   | 0               | 0                                   | 0.2        |
| Ramachandran plot                                   |                 |                                     |            |
| Favored (%)                                         | 98.87           | 98.87                               | 98.66      |
| Allowed (%)                                         | 1.13            | 1.13                                | 1.34       |
| Disallowed (%)                                      | 0               | 0                                   | 0          |

**Supplementary Table 8: complete data from BLI experiments.**

| Experiment             | WT Pa20S + Apa | WT Pa20S + Apa; duplicate | Pa20S_α_E244A_D252A_E255A_D257A + Apa | Pa20S_α_E244A_D252A_E255A_D257A + Apa; duplicate | Pa20S_α_E248Q_D252N_E255Q_D257N + Apa | Pa20S_α_E248Q_D252N_E255Q_D257N + Apa; duplicate |
|------------------------|----------------|---------------------------|---------------------------------------|--------------------------------------------------|---------------------------------------|--------------------------------------------------|
| Binding model          | 2:1            | 2:1                       | 2:1                                   | 2:1                                              | 2:1                                   | 2:1                                              |
| K <sub>D</sub> (M)     | 2.59E-10       | 2.47E-10                  | 1.55E-07                              | 1.65E-07                                         | 1.04E-07                              | 1.26E-07                                         |
| K <sub>D</sub> 2       | 3.05E-08       | 5.44E-08                  | 9.68E-08                              | 1.38E-07                                         | 1.99E-07                              | 2.55E-07                                         |
| K <sub>D</sub> Error   | 4.92E-12       | 3.69E-12                  | 4.25E-09                              | 3.13E-09                                         | 3.14E-09                              | 2.54E-09                                         |
| K <sub>D</sub> 2 Error | 4.77E-09       | 9.12E-09                  | 2.08E-09                              | 2.59E-09                                         | 4.61E-09                              | 5.50E-09                                         |
| ka (1/Ms)              | 1.16E+06       | 1.13E+06                  | 2.70E+04                              | 1.71E+04                                         | 2.68E+04                              | 2.97E+04                                         |
| ka2                    | 9.74E+05       | 6.53E+05                  | 1.04E+06                              | 7.71E+05                                         | 7.68E+05                              | 6.78E+05                                         |
| ka Error               | 1.28E+04       | 1.01E+04                  | 7.24E+02                              | 3.11E+02                                         | 7.90E+02                              | 5.84E+02                                         |
| ka2 Error              | 1.50E+05       | 1.09E+05                  | 2.10E+04                              | 1.37E+04                                         | 1.67E+04                              | 1.37E+04                                         |
| kdis (1/s)             | 2.99E-04       | 2.80E-04                  | 4.19E-03                              | 2.81E-03                                         | 2.79E-03                              | 3.73E-03                                         |
| kdis2                  | 2.97E-02       | 3.55E-02                  | 1.01E-01                              | 1.07E-01                                         | 1.53E-01                              | 1.73E-01                                         |
| kdis Error             | 4.63E-06       | 3.36E-06                  | 2.27E-05                              | 1.54E-05                                         | 1.81E-05                              | 1.79E-05                                         |
| kdis2 Error            | 8.44E-04       | 7.91E-04                  | 7.53E-04                              | 6.45E-04                                         | 1.24E-03                              | 1.34E-03                                         |
| Full X <sup>2</sup>    | 0.4077         | 0.2744                    | 0.3447                                | 0.6228                                           | 0.4144                                | 0.3392                                           |
| Full R <sup>2</sup>    | 0.9968         | 0.998                     | 0.9904                                | 0.9933                                           | 0.9911                                | 0.9940                                           |
